# Supplementary material for: Altered mRNA Splicing, Chondrocyte Gene Expression and Abnormal Skeletal Development due to SF3B4 Mutations in Rodriguez Acrofacial Dysostosis
Source: PLoS Genet. 2016 Sep 13;12(9):e1006307. doi: 10.1371/journal.pgen.1006307 (PMC5021280; doi:10.1371/journal.pgen.1006307)
Supplement: S3 Table — (XLSX) [file pgen.1006307.s005.xlsx]

## Sheet: Summary
Number of alternative splicing events in each category.
	Increase exclusion in R08-269A (ΔPSI<0)	Increase inclusion in R08-269A (ΔPSI>0)	Total events
Skipped exon (SE)	412	353	765
Mutually exclusive exon (MXE)	68	56	124
Alternative 5’ splice site (A5SS)	107	27	134
Alternative 3’ splice site (A3SS)	222	47	269
Retained intron (RI)	233	16	249
Total events	1042	499	1541

## Sheet: SE
GeneID	geneSymbol	chr	strand	exonStart_0base	exonEnd	upstreamES	upstreamEE	downstreamES	downstreamEE	IJC_SAMPLE_1 (R08-269A vs. 14 week control)	SJC_SAMPLE_1 (R08-269A vs. 14 week control)	IJC_SAMPLE_2 (R08-269A vs. 14 week control)	SJC_SAMPLE_2 (R08-269A vs. 14 week control)	IncFormLen (R08-269A vs. 14 week control)	SkipFormLen (R08-269A vs. 14 week control)	PValue (R08-269A vs. 14 week control)	FDR (R08-269A vs. 14 week control)	IncLevel1 (R08-269A vs. 14 week control)	IncLevel2 (R08-269A vs. 14 week control)	IncLevelDifference (R08-269A vs. 14 week control)	IJC_SAMPLE_1 (R08-269A vs. 14 week control)	SJC_SAMPLE_1 (R08-269A vs. 14 week control)	IJC_SAMPLE_2 (R08-269A vs. 14 week control)	SJC_SAMPLE_2 (R08-269A vs. 14 week control)	IncFormLen (R08-269A vs. 14 week control)	SkipFormLen (R08-269A vs. 14 week control)	PValue (R08-269A vs. 14 week control)	FDR (R08-269A vs. 14 week control)	IncLevel1 (R08-269A vs. 14 week control)	IncLevel2 (R08-269A vs. 14 week control)	IncLevelDifference (R08-269A vs. 14 week control)	IJC_SAMPLE_1 (R08-269A vs. 15 week control)	SJC_SAMPLE_1 (R08-269A vs. 15 week control)	IJC_SAMPLE_2 (R08-269A vs. 15 week control)	SJC_SAMPLE_2 (R08-269A vs. 15 week control)	IncFormLen (R08-269A vs. 15 week control)	SkipFormLen (R08-269A vs. 15 week control)	PValue (R08-269A vs. 15 week control)	FDR (R08-269A vs. 15 week control)	IncLevel1 (R08-269A vs. 15 week control)	IncLevel2 (R08-269A vs. 15 week control)	IncLevelDifference (R08-269A vs. 15 week control)	IJC_SAMPLE_1 (R08-269A vs. 18 week control)	SJC_SAMPLE_1 (R08-269A vs. 18 week control)	IJC_SAMPLE_2 (R08-269A vs. 18 week control)	SJC_SAMPLE_2 (R08-269A vs. 18 week control)	IncFormLen (R08-269A vs. 18 week control)	SkipFormLen (R08-269A vs. 18 week control)	PValue (R08-269A vs. 18 week control)
ENSG00000074800	ENO1	chr1	-	8922945	8923057	8921063	8921488	8923293	8923402	1216	33	1284	0	147	74	6.26381e-09	1.45764e-07	0.949	1	-0.051	1216	33	1797	0	147	74	1.71602e-10	5.60385e-09	0.949	1	-0.051	1216	33	1123	0	147	74	2.54372e-08	6.30346e-07	0.949	1	-0.051	1216	33	1391	0	147	74	2.67285e-09
ENSG00000116731	PRDM2	chr1	+	14099572	14099683	14075855	14075982	14142921	14143065	13	16	57	3	147	74	1.79262e-07	3.41965e-06	0.29	0.905	-0.615	13	16	48	4	147	74	3.67351e-06	6.30547e-05	0.29	0.858	-0.568	13	16	22	3	147	74	0.000855589	0.00736007	0.29	0.787	-0.497	13	16	37	5	147	74	0.000109657
ENSG00000127483	HP1BP3	chr1	-	21106837	21107033	21106304	21106404	21113687	21113765	69	50	337	53	147	74	2.04713e-10	5.71648e-09	0.41	0.762	-0.352	69	50	201	73	147	74	0.00300676	0.020882	0.41	0.581	-0.171	69	50	165	50	147	74	0.000416721	0.00403155	0.41	0.624	-0.214	69	50	178	28	147	74	1.4323e-08
ENSG00000183726	TMEM50A	chr1	+	25666964	25667070	25664407	25664947	25669451	25669564	765	43	878	0	147	74	1.21014e-13	4.53982e-12	0.9	1	-0.1	765	43	395	0	147	74	3.47883e-08	8.41965e-07	0.9	1	-0.1	765	43	357	0	147	74	1.21693e-07	2.71241e-06	0.9	1	-0.1	765	43	408	0	147	74	2.29255e-08
ENSG00000242125	SNHG3	chr1	+	28834639	28834672	28832491	28832596	28835341	28837404	160	19	588	0	106	74	4.37772e-12	1.45743e-10	0.855	1	-0.145	160	19	372	0	106	74	6.34674e-10	1.94357e-08	0.855	1	-0.145	160	19	407	0	106	74	2.40857e-10	7.73224e-09	0.855	1	-0.145	160	19	529	0	106	74	1.38352e-11
ENSG00000084636	COL16A1	chr1	-	32128222	32128259	32127934	32127988	32130772	32130835	758	133	388	32	110	74	0.000115056	0.00119961	0.793	0.891	-0.098	758	133	615	43	110	74	1.30887e-07	2.91936e-06	0.793	0.906	-0.113	758	133	608	56	110	74	8.44107e-05	0.00101569	0.793	0.88	-0.087	758	133	821	61	110	74	5.06474e-08
ENSG00000084636	COL16A1	chr1	-	32157017	32157113	32156788	32156827	32157198	32157243	4014	377	2873	0	147	74	0	0	0.843	1	-0.157	4014	377	3044	0	147	74	0	0	0.843	1	-0.157	4014	377	4685	0	147	74	0	0	0.843	1	-0.157	4014	377	5390	0	147	74	0
ENSG00000084636	COL16A1	chr1	-	32158198	32158243	32158074	32158110	32158367	32158409	2188	76	1529	2	118	74	1.16906e-13	4.3922e-12	0.948	0.998	-0.05	2188	76	2033	2	118	74	1.11022e-16	5.639e-15	0.948	0.998	-0.05	2188	76	2301	3	118	74	0	0	0.948	0.998	-0.05	2188	76	3005	4	118	74	0
ENSG00000084636	COL16A1	chr1	-	32164083	32164204	32163506	32163773	32165413	32165531	1831	200	1360	65	147	74	3.45559e-09	8.2957e-08	0.822	0.913	-0.091	1831	200	1733	91	147	74	8.02519e-09	2.1354e-07	0.822	0.906	-0.084	1831	200	1859	114	147	74	1.52071e-06	2.77804e-05	0.822	0.891	-0.069	1831	200	2369	27	147	74	0
ENSG00000084636	COL16A1	chr1	-	32164083	32164207	32163506	32163773	32165413	32165531	3370	200	2706	65	147	74	3.94874e-11	1.19e-09	0.895	0.954	-0.059	3370	200	3562	91	147	74	1.19947e-11	4.42517e-10	0.895	0.952	-0.057	3370	200	3977	114	147	74	5.75645e-10	1.7618e-08	0.895	0.946	-0.051	3370	200	4798	27	147	74	0
ENSG00000054116	TRAPPC3	chr1	-	36603396	36603579	36602172	36602923	36605320	36605420	361	17	716	0	147	74	7.45504e-08	1.5079e-06	0.914	1	-0.086	361	17	189	0	147	74	0.000638892	0.00583835	0.914	1	-0.086	361	17	187	0	147	74	0.000674889	0.00602685	0.914	1	-0.086	361	17	246	0	147	74	0.000148451
ENSG00000163875	MEAF6	chr1	-	37974878	37974924	37967404	37967597	37975055	37975143	152	9	371	0	119	74	4.08508e-05	0.000479484	0.913	1	-0.087	152	9	138	0	119	74	0.00241043	0.0174969	0.913	1	-0.087	152	9	178	0	119	74	0.000905797	0.00771249	0.913	1	-0.087	152	9	156	0	119	74	0.00151899
ENSG00000049089	COL9A2	chr1	-	40769201	40769348	40768802	40768857	40769478	40769511	24139	1077	26820	357	147	74	0	0	0.919	0.974	-0.055	24139	1077	37638	507	147	74	0	0	0.919	0.974	-0.055	24139	1077	27552	366	147	74	0	0	0.919	0.974	-0.055	24139	1077	33253	439	147	74	0
ENSG00000117385	LEPRE1	chr1	-	43212923	43213079	43212201	43212523	43213393	43213469	61	14	146	0	147	74	6.38736e-08	1.30597e-06	0.687	1	-0.313	61	14	83	0	147	74	7.4139e-06	0.000119306	0.687	1	-0.313	61	14	68	0	147	74	3.19958e-05	0.000433189	0.687	1	-0.313	61	14	53	0	147	74	0.000167381
ENSG00000117385	LEPRE1	chr1	-	43212923	43213083	43212005	43212523	43213393	43213469	512	14	808	0	147	74	2.41304e-05	0.000301157	0.948	1	-0.052	512	14	662	0	147	74	6.17707e-05	0.00079024	0.948	1	-0.052	512	14	628	0	147	74	7.9343e-05	0.000960823	0.948	1	-0.052	512	14	495	0	147	74	0.000242615
ENSG00000117385	LEPRE1	chr1	-	43212942	43213079	43212044	43212523	43213393	43213469	328	14	389	0	147	74	3.30884e-05	0.000397828	0.922	1	-0.078	328	14	352	0	147	74	5.89891e-05	0.000758907	0.922	1	-0.078	328	14	390	0	147	74	3.25943e-05	0.000440081	0.922	1	-0.078	328	14	268	0	147	74	0.000261697
ENSG00000117410	ATP6V0B	chr1	+	44442697	44442888	44442444	44442496	44443652	44443961	619	81	1164	0	147	74	0	0	0.794	1	-0.206	619	81	603	0	147	74	0	0	0.794	1	-0.206	619	81	554	3	147	74	0	0	0.794	0.989	-0.195	619	81	496	4	147	74	7.77156e-16
ENSG00000142937	RPS8	chr1	+	45242346	45242446	45241705	45241812	45243671	45243759	1129	243	434	0	147	74	0	0	0.7	1	-0.3	1129	243	681	0	147	74	0	0	0.7	1	-0.3	1129	243	885	0	147	74	0	0	0.7	1	-0.3	1129	243	562	0	147	74	0
ENSG00000142937	RPS8	chr1	+	45243285	45243461	45241307	45241812	45243671	45243801	2422	243	1570	0	147	74	0	0	0.834	1	-0.166	2422	243	2691	0	147	74	0	0	0.834	1	-0.166	2422	243	3370	0	147	74	0	0	0.834	1	-0.166	2422	243	2487	0	147	74	0
ENSG00000132780	NASP	chr1	+	46072153	46072263	46070607	46070688	46072992	46074009	296	12	670	0	147	74	4.82708e-06	7.13819e-05	0.925	1	-0.075	296	12	326	0	147	74	0.000194322	0.00213141	0.925	1	-0.075	296	12	267	0	147	74	0.0005019	0.00470038	0.925	1	-0.075	296	12	294	0	147	74	0.00031978
ENSG00000184588	PDE4B	chr1	+	66828850	66828949	66827297	66827476	66829089	66829254	915	51	453	0	147	74	3.4117e-09	8.20583e-08	0.9	1	-0.1	915	51	609	0	147	74	3.00712e-11	1.06618e-09	0.9	1	-0.1	915	51	387	0	147	74	3.08334e-08	7.54569e-07	0.9	1	-0.1	915	51	665	0	147	74	6.33082e-12
ENSG00000137955	RABGGTB	chr1	+	76253181	76256202	76251881	76251959	76256969	76257022	148	33	174	0	147	74	2.55332e-11	7.88153e-10	0.693	1	-0.307	148	33	512	0	147	74	0	0	0.693	1	-0.307	148	33	173	0	147	74	2.80701e-11	9.98873e-10	0.693	1	-0.307	148	33	404	23	147	74	2.10254e-06
ENSG00000060718	COL11A1	chr1	-	103388891	103388945	103387073	103387127	103400004	103400112	12856	762	21583	80	127	74	0	0	0.908	0.994	-0.086	12856	762	17298	0	127	74	0	0	0.908	1	-0.092	12856	762	13908	0	127	74	0	0	0.908	1	-0.092	12856	762	18479	0	127	74	0
ENSG00000060718	COL11A1	chr1	-	103412404	103412512	103405882	103405990	103427421	103427475	18355	851	33767	7	147	74	0	0	0.916	1	-0.084	18355	851	26916	1	147	74	0	0	0.916	1	-0.084	18355	851	19139	0	147	74	0	0	0.916	1	-0.084	18355	851	26819	2	147	74	0
ENSG00000060718	COL11A1	chr1	-	103469999	103470044	103468770	103468824	103470163	103470217	11277	1158	21971	0	118	74	0	0	0.859	1	-0.141	11277	1158	17153	17	118	74	0	0	0.859	0.998	-0.139	11277	1158	13338	0	118	74	0	0	0.859	1	-0.141	11277	1158	18289	0	118	74	0
ENSG00000060718	COL11A1	chr1	-	103470007	103470044	103468770	103468824	103470163	103470217	4106	1158	9618	0	110	74	0	0	0.705	1	-0.295	4106	1158	5660	17	110	74	0	0	0.705	0.996	-0.291	4106	1158	5619	0	110	74	0	0	0.705	1	-0.295	4106	1158	8004	0	110	74	0
ENSG00000060718	COL11A1	chr1	-	103471623	103471677	103471393	103471447	103471817	103471871	15008	1062	34167	0	127	74	0	0	0.892	1	-0.108	15008	1062	24950	0	127	74	0	0	0.892	1	-0.108	15008	1062	16250	0	127	74	0	0	0.892	1	-0.108	15008	1062	24075	0	127	74	0
ENSG00000060718	COL11A1	chr1	-	103471623	103471720	103471393	103471447	103471817	103471871	9156	1062	19199	0	147	74	0	0	0.813	1	-0.187	9156	1062	13409	0	147	74	0	0	0.813	1	-0.187	9156	1062	9358	0	147	74	0	0	0.813	1	-0.187	9156	1062	12781	0	147	74	0
ENSG00000060718	COL11A1	chr1	-	103483375	103483438	103481223	103481298	103484373	103484415	8041	526	16564	0	136	74	0	0	0.893	1	-0.107	8041	526	15133	0	136	74	0	0	0.893	1	-0.107	8041	526	10706	0	136	74	0	0	0.893	1	-0.107	8041	526	14017	0	136	74	0
ENSG00000064886	CHI3L2	chr1	+	111781371	111781554	111778645	111778775	111783948	111784065	9312	287	389	0	147	74	1.43802e-05	0.000189562	0.942	1	-0.058	9312	287	296	0	147	74	0.000154081	0.00175416	0.942	1	-0.058	9312	287	152	0	147	74	0.0070657	0.0402061	0.942	1	-0.058	9312	287	332	0	147	74	6.10972e-05
ENSG00000143554	SLC27A3	chr1	+	153751162	153751361	153750938	153751029	153751589	153751687	25	13	57	8	147	74	0.0101089	0.0497426	0.492	0.782	-0.29	25	13	68	0	147	74	1.91249e-07	4.14381e-06	0.492	1	-0.508	25	13	53	0	147	74	1.59158e-06	2.89187e-05	0.492	1	-0.508	25	13	16	0	147	74	0.00299412
ENSG00000169231	THBS3	chr1	-	155170687	155170795	155170246	155170401	155170884	155170995	531	84	237	0	147	74	1.46883e-13	5.45794e-12	0.761	1	-0.239	531	84	563	0	147	74	0	0	0.761	1	-0.239	531	84	1250	0	147	74	0	0	0.761	1	-0.239	531	84	596	0	147	74	0
ENSG00000163468	CCT3	chr1	-	156280348	156280480	156278759	156279094	156280740	156280986	1061	29	3230	0	147	74	6.25566e-12	2.04384e-10	0.949	1	-0.051	1061	29	1074	0	147	74	7.43759e-08	1.71422e-06	0.949	1	-0.051	1061	29	894	0	147	74	3.97386e-07	8.00134e-06	0.949	1	-0.051	1061	29	1117	0	147	74	5.15324e-08
ENSG00000163382	APOA1BP	chr1	+	156561896	156562001	156561683	156561778	156562156	156562267	34	7	122	0	147	74	2.48485e-05	0.000308981	0.71	1	-0.29	34	7	35	0	147	74	0.00587471	0.0356723	0.71	1	-0.29	34	7	60	0	147	74	0.000709996	0.00629127	0.71	1	-0.29	34	7	39	0	147	74	0.00399503
ENSG00000234741	GAS5	chr1	-	173833394	173833442	173833038	173833213	173833812	173833842	124	15	106	0	121	74	7.81698e-05	0.000852229	0.835	1	-0.165	124	15	251	0	121	74	1.11933e-07	2.51716e-06	0.835	1	-0.165	124	15	215	0	121	74	4.14542e-07	8.32365e-06	0.835	1	-0.165	124	15	184	0	121	74	1.46965e-06
ENSG00000234741	GAS5	chr1	-	173833394	173833644	173833039	173833213	173833812	173833835	210	15	141	0	147	74	0.00032706	0.00297198	0.876	1	-0.124	210	15	357	0	147	74	6.02882e-07	1.20461e-05	0.876	1	-0.124	210	15	340	0	147	74	8.80988e-07	1.67272e-05	0.876	1	-0.124	210	15	251	0	147	74	8.40428e-06
ENSG00000234741	GAS5	chr1	-	173834366	173834420	173833394	173833442	173834647	173834685	565	160	297	33	127	74	9.71706e-07	1.64495e-05	0.673	0.84	-0.167	565	160	835	106	127	74	2.94907e-09	8.28729e-08	0.673	0.821	-0.148	565	160	712	112	127	74	1.26687e-05	0.000188933	0.673	0.787	-0.114	565	160	608	95	127	74	2.31901e-05
ENSG00000057252	SOAT1	chr1	+	179271811	179271937	179262931	179263071	179304640	179304792	30	8	118	0	147	74	3.94592e-06	5.9317e-05	0.654	1	-0.346	30	8	36	0	147	74	0.0018402	0.0140409	0.654	1	-0.346	30	8	25	0	147	74	0.00744539	0.0418142	0.654	1	-0.346	30	8	27	0	147	74	0.0056622
ENSG00000057252	SOAT1	chr1	+	179292571	179292630	179262924	179263071	179304640	179304792	13	8	99	0	132	74	1.55587e-07	3.00482e-06	0.477	1	-0.523	13	8	26	0	132	74	0.0003896	0.00383981	0.477	1	-0.523	13	8	16	0	132	74	0.00326785	0.0218987	0.477	1	-0.523	13	8	27	0	132	74	0.000324192
ENSG00000143337	TOR1AIP1	chr1	+	179858447	179858504	179853826	179853904	179869260	179869302	51	6	506	9	130	74	0.00205146	0.013881	0.829	0.97	-0.141	51	6	483	6	130	74	0.000572445	0.00531024	0.829	0.979	-0.15	51	6	333	6	130	74	0.00338129	0.0224874	0.829	0.969	-0.14	51	6	541	10	130	74	0.00223636
ENSG00000116260	QSOX1	chr1	+	180155187	180155317	180123968	180124307	180158686	180158809	254	40	353	0	147	74	4.32987e-15	1.79511e-13	0.762	1	-0.238	254	40	331	0	147	74	1.66533e-14	7.4962e-13	0.762	1	-0.238	254	40	323	0	147	74	2.74225e-14	1.21583e-12	0.762	1	-0.238	254	40	311	0	147	74	5.89528e-14
ENSG00000133048	CHI3L1	chr1	-	203155443	203155473	203154311	203154513	203155726	203155877	2143	190	649	0	103	74	0	0	0.89	1	-0.11	2143	190	274	0	103	74	3.65586e-10	1.14392e-08	0.89	1	-0.11	2143	190	187	0	103	74	1.87688e-07	4.03181e-06	0.89	1	-0.11	2143	190	168	0	103	74	7.65686e-07
ENSG00000058673	ZC3H11A	chr1	+	203809433	203809502	203807093	203807192	203816311	203816815	47	5	106	0	142	74	0.00199	0.0135481	0.83	1	-0.17	47	5	119	0	142	74	0.00137865	0.0110912	0.83	1	-0.17	47	5	89	0	142	74	0.00342398	0.0227252	0.83	1	-0.17	47	5	120	0	142	74	0.00134227
ENSG00000117724	CENPF	chr1	+	214817899	214820743	214811208	214811344	214822017	214822170	16	5	118	0	147	74	3.30127e-05	0.000397105	0.617	1	-0.383	16	5	57	0	147	74	0.00057026	0.00529357	0.617	1	-0.383	16	5	34	0	147	74	0.00351288	0.0231995	0.617	1	-0.383	16	5	57	0	147	74	0.00057026
ENSG00000162909	CAPN2	chr1	+	223945070	223945082	223943181	223943351	223946971	223947183	40	30	64	0	85	74	3.85869e-11	1.16355e-09	0.537	1	-0.463	40	30	22	0	85	74	2.03169e-05	0.00029519	0.537	1	-0.463	40	30	13	0	85	74	0.000939429	0.00795168	0.537	1	-0.463	40	30	503	105	85	74	3.50698e-06
ENSG00000123240	OPTN	chr10	+	13167417	13167567	13165994	13166110	13167945	13168039	613	33	314	0	147	74	1.63666e-06	2.64391e-05	0.903	1	-0.097	613	33	414	0	147	74	8.81853e-08	2.01128e-06	0.903	1	-0.097	613	33	162	0	147	74	0.000324799	0.00326102	0.903	1	-0.097	613	33	242	0	147	74	1.72698e-05
ENSG00000078403	MLLT10	chr10	+	21940601	21940697	21906040	21906136	21959377	21959633	16	4	94	0	147	74	0.000450078	0.00390019	0.668	1	-0.332	16	4	78	0	147	74	0.000807688	0.00712219	0.668	1	-0.332	16	4	52	0	147	74	0.00280699	0.0193668	0.668	1	-0.332	16	4	55	0	147	74	0.00237281
ENSG00000197746	PSAP	chr10	-	73583644	73583650	73581632	73581764	73585593	73585650	37	578	220	778	79	74	0	0	0.057	0.209	-0.152	37	578	141	621	79	74	1.28386e-12	5.12428e-11	0.057	0.175	-0.118	37	578	219	576	79	74	0	0	0.057	0.263	-0.206	37	578	179	335	79	74	0
ENSG00000156650	KAT6B	chr10	+	76741544	76744999	76738981	76739097	76748776	76748870	11	3	56	0	147	74	0.00417778	0.0248014	0.649	1	-0.351	11	3	75	0	147	74	0.00204505	0.0152857	0.649	1	-0.351	11	3	41	0	147	74	0.00872682	0.0473108	0.649	1	-0.351	11	3	60	0	147	74	0.00353076
ENSG00000198408	MGEA5	chr10	-	103567486	103567658	103563503	103563776	103572786	103572884	9	6	16	0	147	74	0.00436274	0.0256718	0.43	1	-0.57	9	6	58	0	147	74	1.91946e-05	0.000280676	0.43	1	-0.57	9	6	22	0	147	74	0.00136826	0.0108034	0.43	1	-0.57	9	6	25	1	147	74	0.00504305
ENSG00000173915	USMG5	chr10	-	105155502	105155789	105152127	105152223	105156165	105156198	48	418	64	150	147	74	6.99256e-10	1.82604e-08	0.055	0.177	-0.122	48	418	47	68	147	74	4.15112e-13	1.70418e-11	0.055	0.258	-0.203	48	418	45	85	147	74	3.99385e-10	1.24165e-08	0.055	0.21	-0.155	48	418	56	93	147	74	4.78617e-13
ENSG00000108055	SMC3	chr10	+	112360196	112360304	112359411	112359570	112360779	112360888	178	11	433	0	147	74	3.09937e-06	4.73699e-05	0.891	1	-0.109	178	11	256	0	147	74	6.08257e-05	0.000779852	0.891	1	-0.109	178	11	162	0	147	74	0.000620181	0.00562506	0.891	1	-0.109	178	11	227	0	147	74	0.000115598
ENSG00000138162	TACC2	chr10	+	124009058	124009179	124008564	124008671	124013505	124014057	58	8	131	0	147	74	6.8298e-05	0.000756419	0.785	1	-0.215	58	8	119	0	147	74	0.000110668	0.00131361	0.785	1	-0.215	58	8	111	0	147	74	0.000155985	0.00173375	0.785	1	-0.215	58	8	92	0	147	74	0.000382091
ENSG00000132334	PTPRE	chr10	+	129864338	129864458	129861346	129861444	129866386	129866550	269	8	273	0	147	74	0.00453372	0.026468	0.944	1	-0.056	269	8	310	0	147	74	0.0031203	0.0215224	0.944	1	-0.056	269	8	224	0	147	74	0.00796542	0.0439774	0.944	1	-0.056	269	8	331	0	147	74	0.00256767
ENSG00000177666	PNPLA2	chr11	+	819573	819905	818901	818958	821627	821860	50	10	66	0	147	74	0.000203623	0.0019764	0.716	1	-0.284	50	10	62	0	147	74	0.000285647	0.00295783	0.716	1	-0.284	50	10	55	0	147	74	0.000533917	0.00495777	0.716	1	-0.284	50	10	31	0	147	74	0.00665708
ENSG00000167325	RRM1	chr11	+	4130873	4130933	4128664	4128765	4132830	4132870	100	12	252	0	133	74	4.27802e-07	7.70618e-06	0.823	1	-0.177	100	12	152	0	133	74	1.45684e-05	0.000219012	0.823	1	-0.177	100	12	144	0	133	74	2.06988e-05	0.000293655	0.823	1	-0.177	100	12	162	0	133	74	9.55978e-06
ENSG00000166333	ILK	chr11	+	6629623	6629719	6629275	6629441	6629923	6630020	395	19	685	0	147	74	3.79741e-08	7.99563e-07	0.913	1	-0.087	395	19	685	0	147	74	3.79741e-08	9.14208e-07	0.913	1	-0.087	395	19	411	0	147	74	2.71098e-06	4.69617e-05	0.913	1	-0.087	395	19	361	0	147	74	7.30926e-06
ENSG00000175356	SCUBE2	chr11	-	9068902	9069109	9055172	9055343	9072152	9072257	118	9	281	0	147	74	2.21603e-05	0.000279586	0.868	1	-0.132	118	9	86	0	147	74	0.004619	0.0294813	0.868	1	-0.132	118	9	174	0	147	74	0.000238123	0.00250352	0.868	1	-0.132	118	9	106	0	147	74	0.0020795
ENSG00000175356	SCUBE2	chr11	-	9077339	9077456	9072152	9072257	9080849	9080972	111	7	338	0	147	74	9.07889e-05	0.000971436	0.889	1	-0.111	111	7	113	0	147	74	0.00492821	0.0310006	0.889	1	-0.111	111	7	133	0	147	74	0.00286549	0.0197013	0.889	1	-0.111	111	7	122	0	147	74	0.00383245
ENSG00000133805	AMPD3	chr11	+	10514895	10515090	10483061	10483287	10516445	10516577	234	44	37	0	147	74	0.00138529	0.010096	0.728	1	-0.272	234	44	372	1	147	74	1.11022e-16	5.639e-15	0.728	0.995	-0.267	234	44	108	0	147	74	8.89913e-08	2.02573e-06	0.728	1	-0.272	234	44	394	1	147	74	0
ENSG00000110328	GALNT18	chr11	-	11454167	11454334	11400627	11400811	11642905	11643552	154	10	141	0	147	74	0.00108206	0.00823156	0.886	1	-0.114	154	10	229	0	147	74	0.000109948	0.00130676	0.886	1	-0.114	154	10	126	0	147	74	0.00174234	0.0131777	0.886	1	-0.114	154	10	219	0	147	74	0.000137615
ENSG00000197601	FAR1	chr11	+	13733310	13733355	13732270	13732417	13733474	13733602	41	7	207	7	118	74	0.00624328	0.034157	0.786	0.949	-0.163	41	7	113	0	118	74	9.11156e-05	0.00110925	0.786	1	-0.214	41	7	56	0	118	74	0.00184855	0.0138196	0.786	1	-0.214	41	7	103	0	118	74	0.000139175
ENSG00000129084	PSMA1	chr11	-	14535362	14536037	14532417	14532497	14539187	14539219	422	18	706	0	147	74	1.69425e-07	3.25356e-06	0.922	1	-0.078	422	18	447	0	147	74	5.4672e-06	9.05963e-05	0.922	1	-0.078	422	18	351	0	147	74	2.92514e-05	0.00039955	0.922	1	-0.078	422	18	455	0	147	74	4.80871e-06
ENSG00000110700	RPS13	chr11	-	17098714	17098793	17097000	17097170	17098975	17099024	1648	278	909	0	147	74	0	0	0.749	1	-0.251	1648	278	1540	179	147	74	0.000244722	0.00259055	0.749	0.812	-0.063	1648	278	1983	233	147	74	0.000137669	0.00155396	0.749	0.811	-0.062	1648	278	1404	169	147	74	0.00110074
ENSG00000134333	LDHA	chr11	+	18420977	18421095	18418365	18418515	18424386	18424560	356	79	258	0	147	74	0	0	0.694	1	-0.306	356	79	1290	26	147	74	0	0	0.694	0.962	-0.268	356	79	740	34	147	74	1.45439e-14	6.54264e-13	0.694	0.916	-0.222	356	79	597	13	147	74	0
ENSG00000134333	LDHA	chr11	+	18422383	18422557	18418365	18418515	18424386	18424560	358	79	79	0	147	74	2.72331e-07	5.07454e-06	0.695	1	-0.305	358	79	936	26	147	74	0	0	0.695	0.948	-0.253	358	79	647	34	147	74	2.94187e-12	1.13376e-10	0.695	0.905	-0.21	358	79	280	13	147	74	8.29201e-09
ENSG00000134333	LDHA	chr11	+	18422383	18422557	18418365	18418515	18426995	18427119	320	328	62	0	147	74	0	0	0.329	1	-0.671	320	328	1676	0	147	74	0	0	0.329	1	-0.671	320	328	603	0	147	74	0	0	0.329	1	-0.671	320	328	257	1	147	74	0
ENSG00000149100	EIF3M	chr11	+	32616459	32616559	32615411	32615495	32622234	32622378	583	62	651	32	147	74	0.000451772	0.00391044	0.826	0.911	-0.085	583	62	525	15	147	74	8.30782e-07	1.60742e-05	0.826	0.946	-0.12	583	62	476	8	147	74	3.92395e-09	1.08126e-07	0.826	0.968	-0.142	583	62	494	22	147	74	0.000361893
ENSG00000149100	EIF3M	chr11	+	32617511	32617593	32615314	32615495	32622234	32622378	513	62	630	32	147	74	8.26693e-05	0.000894383	0.806	0.908	-0.102	513	62	520	15	147	74	6.76765e-08	1.57042e-06	0.806	0.946	-0.14	513	62	481	8	147	74	1.61718e-10	5.29173e-09	0.806	0.968	-0.162	513	62	547	22	147	74	5.31427e-06
ENSG00000110422	HIPK3	chr11	+	33350055	33350179	33307958	33309057	33360302	33360389	67	13	225	0	147	74	9.51795e-09	2.16451e-07	0.722	1	-0.278	67	13	179	0	147	74	7.10201e-08	1.64382e-06	0.722	1	-0.278	67	13	161	0	147	74	1.75176e-07	3.78285e-06	0.722	1	-0.278	67	13	151	0	147	74	2.99416e-07
ENSG00000026508	CD44	chr11	+	35198148	35198287	35160727	35160917	35201820	35201876	3283	113	1218	0	147	74	3.4639e-14	1.34716e-12	0.936	1	-0.064	3283	113	2195	0	147	74	0	0	0.936	1	-0.064	3283	113	1825	0	147	74	0	0	0.936	1	-0.064	3283	113	2301	0	147	74	0
ENSG00000026508	CD44	chr11	+	35211381	35211519	35201820	35201954	35236398	35236429	23	8	117	0	147	74	1.01466e-06	1.7097e-05	0.591	1	-0.409	23	8	25	0	147	74	0.00329107	0.0224311	0.591	1	-0.409	23	8	93	0	147	74	4.12124e-06	6.9152e-05	0.591	1	-0.409	23	8	25	0	147	74	0.00329107
ENSG00000026508	CD44	chr11	+	35211381	35211519	35208378	35208447	35236398	35236429	4080	172	1332	0	147	74	0	0	0.923	1	-0.077	4080	172	2422	6	147	74	0	0	0.923	0.995	-0.072	4080	172	2029	6	147	74	0	0	0.923	0.994	-0.071	4080	172	2772	6	147	74	0
ENSG00000151348	EXT2	chr11	+	44135734	44135851	44130743	44130833	44151594	44151688	327	34	556	0	147	74	1.65423e-14	6.60524e-13	0.829	1	-0.171	327	34	261	0	147	74	3.51681e-09	9.79701e-08	0.829	1	-0.171	327	34	310	0	147	74	2.99483e-10	9.49661e-09	0.829	1	-0.171	327	34	267	0	147	74	2.56996e-09
ENSG00000198561	CTNND1	chr11	+	57572134	57572252	57571092	57571276	57573353	57573507	214	11	795	0	147	74	5.1793e-07	9.1994e-06	0.907	1	-0.093	214	11	526	0	147	74	4.29069e-06	7.28923e-05	0.907	1	-0.093	214	11	253	0	147	74	0.000199793	0.00214827	0.907	1	-0.093	214	11	406	0	147	74	1.72187e-05
ENSG00000134824	FADS2	chr11	+	61615630	61615756	61608095	61608197	61624482	61624543	285	11	917	0	147	74	3.15555e-06	4.81761e-05	0.929	1	-0.071	285	11	595	0	147	74	2.04063e-05	0.000296174	0.929	1	-0.071	285	11	263	0	147	74	0.000840258	0.00725148	0.929	1	-0.071	285	11	377	0	147	74	0.000170809
ENSG00000168003	SLC3A2	chr11	+	62652648	62653080	62652103	62652162	62655606	62655641	1263	115	1629	0	147	74	0	0	0.847	1	-0.153	1263	115	5056	0	147	74	0	0	0.847	1	-0.153	1263	115	2952	0	147	74	0	0	0.847	1	-0.153	1263	115	2975	0	147	74	0
ENSG00000167770	OTUB1	chr11	+	63764247	63764413	63764001	63764120	63764521	63764716	188	21	363	0	147	74	3.98656e-10	1.07073e-08	0.818	1	-0.182	188	21	201	0	147	74	2.71868e-07	5.77598e-06	0.818	1	-0.182	188	21	160	0	147	74	2.33362e-06	4.09437e-05	0.818	1	-0.182	188	21	164	0	147	74	1.86909e-06
ENSG00000167770	OTUB1	chr11	+	63764328	63764413	63764001	63764120	63764521	63764716	294	21	611	0	147	74	3.43083e-10	9.31801e-09	0.876	1	-0.124	294	21	317	0	147	74	3.23171e-07	6.76848e-06	0.876	1	-0.124	294	21	264	0	147	74	1.71179e-06	3.09265e-05	0.876	1	-0.124	294	21	266	0	147	74	1.60198e-06
ENSG00000173120	KDM2A	chr11	+	67010479	67010563	67007771	67007840	67012659	67012929	132	17	257	0	147	74	1.7131e-08	3.75789e-07	0.796	1	-0.204	132	17	360	1	147	74	3.71312e-09	1.03071e-07	0.796	0.995	-0.199	132	17	212	0	147	74	1.11892e-07	2.5053e-06	0.796	1	-0.204	132	17	288	0	147	74	5.39811e-09
ENSG00000214530	STARD10	chr11	-	72469574	72469678	72466745	72466798	72470278	72470426	413	32	218	0	147	74	1.33585e-06	2.20414e-05	0.867	1	-0.133	413	32	347	0	147	74	6.40479e-09	1.73241e-07	0.867	1	-0.133	413	32	241	0	147	74	4.71942e-07	9.35783e-06	0.867	1	-0.133	413	32	239	0	147	74	5.1575e-07
ENSG00000149273	RPS3	chr11	+	75112683	75112777	75110563	75110621	75113395	75113490	563	481	476	0	147	74	0	0	0.371	1	-0.629	563	481	645	0	147	74	0	0	0.371	1	-0.629	563	481	557	0	147	74	0	0	0.371	1	-0.629	563	481	501	263	147	74	6.28864e-07
ENSG00000149269	PAK1	chr11	-	77043774	77043912	77036372	77036421	77047130	77047327	67	9	80	0	147	74	0.000625293	0.00515872	0.789	1	-0.211	67	9	123	0	147	74	7.094e-05	0.000890846	0.789	1	-0.211	67	9	84	0	147	74	0.000496096	0.00465755	0.789	1	-0.211	67	9	100	0	147	74	0.000209845
ENSG00000087053	MTMR2	chr11	-	95590715	95590799	95583763	95583913	95591694	95591796	152	7	271	0	147	74	0.000916293	0.00714577	0.916	1	-0.084	152	7	214	0	147	74	0.00200447	0.0150524	0.916	1	-0.084	152	7	190	0	147	74	0.00294369	0.0201238	0.916	1	-0.084	152	7	217	0	147	74	0.00191528
ENSG00000152558	TMEM123	chr11	-	102272269	102272423	102267062	102269622	102272646	102272937	486	28	976	0	147	74	1.41298e-12	4.87311e-11	0.897	1	-0.103	486	28	930	0	147	74	2.74947e-12	1.07078e-10	0.897	1	-0.103	486	28	600	0	147	74	9.0796e-10	2.71472e-08	0.897	1	-0.103	486	28	700	0	147	74	1.25795e-10
ENSG00000076043	REXO2	chr11	+	114316700	114316809	114314577	114314655	114318547	114318601	248	11	613	0	147	74	6.13417e-06	8.84977e-05	0.919	1	-0.081	248	11	267	0	147	74	0.000364101	0.00362514	0.919	1	-0.081	248	11	166	0	147	74	0.00274711	0.0190364	0.919	1	-0.081	248	11	300	0	147	74	0.000210999
ENSG00000082805	ERC1	chr12	+	1372199	1372331	1345934	1346070	1399017	1399178	51	6	248	5	147	74	0.0069935	0.0372992	0.811	0.961	-0.15	51	6	81	0	147	74	0.0023136	0.0169019	0.811	1	-0.189	51	6	67	0	147	74	0.00442923	0.0278189	0.811	1	-0.189	51	6	64	0	147	74	0.00515178
ENSG00000111640	GAPDH	chr12	+	6643975	6644027	6643706	6643735	6645659	6645759	3046	699	2822	453	125	74	4.57152e-08	9.51918e-07	0.721	0.787	-0.066	3046	699	9582	1	125	74	0	0	0.721	1	-0.279	3046	699	9385	1	125	74	0	0	0.721	1	-0.279	3046	699	5195	1	125	74	0
ENSG00000111640	GAPDH	chr12	+	6643975	6644157	6643698	6643735	6645659	6645759	2116	699	1852	453	147	74	9.75308e-06	0.000133875	0.604	0.673	-0.069	2116	699	6089	1	147	74	0	0	0.604	1	-0.396	2116	699	6855	1	147	74	0	0	0.604	1	-0.396	2116	699	3343	1	147	74	0
ENSG00000111788	RP11-22B23.1	chr12	+	9455218	9455298	9454823	9454870	9456570	9456615	33	5	130	2	147	74	0.0059736	0.0329728	0.769	0.97	-0.201	33	5	76	0	147	74	0.00190952	0.0144638	0.769	1	-0.231	33	5	46	0	147	74	0.00925437	0.0494887	0.769	1	-0.231	33	5	55	0	147	74	0.00540668
ENSG00000139154	AEBP2	chr12	+	19646733	19646920	19626181	19626289	19653030	19653155	147	14	290	0	147	74	3.51358e-07	6.41089e-06	0.841	1	-0.159	147	14	222	0	147	74	2.77597e-06	4.88307e-05	0.841	1	-0.159	147	14	172	0	147	74	1.73092e-05	0.000250252	0.841	1	-0.159	147	14	210	0	147	74	4.18941e-06
ENSG00000139219	COL2A1	chr12	-	48371102	48371210	48370884	48370938	48371382	48371436	153011	6819	230203	0	147	74	0	0	0.919	1	-0.081	153011	6819	244817	0	147	74	0	0	0.919	1	-0.081	153011	6819	186940	0	147	74	0	0	0.919	1	-0.081	153011	6819	227467	0	147	74	0
ENSG00000139219	COL2A1	chr12	-	48389492	48389546	48389037	48389091	48390330	48390408	18821	3811	29630	4485	127	74	0	0	0.742	0.794	-0.052	18821	3811	56874	6702	127	74	0	0	0.742	0.832	-0.09	18821	3811	37619	4781	127	74	0	0	0.742	0.821	-0.079	18821	3811	58293	6396	127	74	0
ENSG00000139644	TMBIM6	chr12	+	50135739	50135898	50135356	50135394	50146246	50146332	13	732	46	70	147	74	0	0	0.009	0.249	-0.24	13	732	18	80	147	74	2.05488e-10	6.63897e-09	0.009	0.102	-0.093	13	732	10	46	147	74	7.64089e-07	1.47005e-05	0.009	0.099	-0.09	13	732	18	60	147	74	4.30644e-12
ENSG00000139644	TMBIM6	chr12	+	50152009	50152058	50149417	50149538	50152165	50152263	1947	247	3265	0	122	74	0	0	0.827	1	-0.173	1947	247	2678	0	122	74	0	0	0.827	1	-0.173	1947	247	2009	0	122	74	0	0	0.827	1	-0.173	1947	247	2652	0	122	74	0
ENSG00000197111	PCBP2	chr12	+	53861004	53861077	53856264	53856351	53862560	53862616	368	17	578	0	146	74	4.91609e-07	8.78403e-06	0.916	1	-0.084	368	17	516	0	146	74	1.15942e-06	2.18823e-05	0.916	1	-0.084	368	17	528	7	146	74	0.00398466	0.0256375	0.916	0.975	-0.059	368	17	410	0	146	74	6.21412e-06
ENSG00000197111	PCBP2	chr12	+	53861004	53861077	53859715	53859757	53862563	53862616	296	19	377	0	146	74	3.2168e-07	5.9118e-06	0.888	1	-0.112	296	19	512	0	146	74	1.88967e-08	4.73721e-07	0.888	1	-0.112	296	19	454	0	146	74	5.89737e-08	1.38868e-06	0.888	1	-0.112	296	19	395	0	146	74	2.11844e-07
ENSG00000111481	COPZ1	chr12	+	54739243	54739299	54737008	54737100	54741550	54741628	466	39	768	27	129	74	0.000691336	0.00560987	0.873	0.942	-0.069	466	39	468	8	129	74	4.31451e-06	7.32515e-05	0.873	0.971	-0.098	466	39	439	0	129	74	2.56343e-11	9.15504e-10	0.873	1	-0.127	466	39	751	0	129	74	1.55431e-15
ENSG00000161638	ITGA5	chr12	-	54801615	54801660	54801432	54801476	54801893	54802019	1192	82	1770	0	118	74	0	0	0.901	1	-0.099	1192	82	1955	36	118	74	1.05188e-11	3.89381e-10	0.901	0.971	-0.07	1192	82	1131	31	118	74	7.11309e-06	0.000113363	0.901	0.958	-0.057	1192	82	1886	0	118	74	0
ENSG00000196531	NACA	chr12	-	57118235	57118333	57108385	57108471	57118745	57119040	35	9	155	0	147	74	4.00739e-07	7.25465e-06	0.662	1	-0.338	35	9	193	5	147	74	9.91613e-05	0.00119627	0.662	0.951	-0.289	35	9	156	5	147	74	0.000398956	0.00387722	0.662	0.94	-0.278	35	9	114	4	147	74	0.0011714
ENSG00000185633	NDUFA4L2	chr12	-	57630106	57630464	57629531	57629592	57630811	57630883	1320	109	135	0	147	74	1.90985e-05	0.000245152	0.859	1	-0.141	1320	109	1964	40	147	74	1.88738e-15	9.08755e-14	0.859	0.961	-0.102	1320	109	1682	62	147	74	4.70729e-07	9.34131e-06	0.859	0.932	-0.073	1320	109	1493	27	147	74	7.43849e-15
ENSG00000185633	NDUFA4L2	chr12	-	57630369	57630464	57629531	57629592	57630811	57630883	1668	109	148	0	147	74	7.00102e-05	0.000773213	0.885	1	-0.115	1668	109	2712	40	147	74	0	0	0.885	0.972	-0.087	1668	109	2296	62	147	74	2.69395e-08	6.65898e-07	0.885	0.949	-0.064	1668	109	2016	27	147	74	2.22045e-16
ENSG00000187109	NAP1L1	chr12	-	76453917	76454059	76449812	76449941	76467982	76468019	90	79	176	0	147	74	0	0	0.364	1	-0.636	90	79	131	35	147	74	6.30147e-07	1.2507e-05	0.364	0.653	-0.289	90	79	138	0	147	74	0	0	0.364	1	-0.636	90	79	110	5	147	74	1.11022e-16
ENSG00000028203	VEZT	chr12	+	95656681	95656857	95650325	95650398	95660132	95660365	37	10	71	0	147	74	2.81576e-05	0.000345318	0.651	1	-0.349	37	10	73	0	147	74	2.36438e-05	0.000336893	0.651	1	-0.349	37	10	49	0	147	74	0.000248692	0.00259249	0.651	1	-0.349	37	10	64	0	147	74	5.33847e-05
ENSG00000008405	CRY1	chr12	-	107398918	107399026	107395541	107395726	107415861	107415970	125	8	119	0	147	74	0.00322118	0.020054	0.887	1	-0.113	125	8	236	0	147	74	0.000212969	0.00230355	0.887	1	-0.113	125	8	229	0	147	74	0.000242104	0.00253779	0.887	1	-0.113	125	8	244	0	147	74	0.000184678
ENSG00000111011	RSRC2	chr12	-	122999651	122999774	122995655	122995700	123001773	123001977	445	20	647	0	147	74	9.93542e-08	1.97351e-06	0.918	1	-0.082	445	20	1314	18	147	74	0.000420521	0.00409211	0.918	0.974	-0.056	445	20	914	0	147	74	4.58282e-09	1.24952e-07	0.918	1	-0.082	445	20	828	0	147	74	1.11142e-08
ENSG00000111011	RSRC2	chr12	-	123005050	123005128	123003476	123003576	123005931	123005975	8	304	105	448	147	74	2.59792e-14	1.02209e-12	0.013	0.106	-0.093	8	304	293	1018	147	74	0	0	0.013	0.127	-0.114	8	304	167	632	147	74	0	0	0.013	0.117	-0.104	8	304	184	582	147	74	0
ENSG00000133110	POSTN	chr13	-	38143436	38143490	38138655	38138697	38143880	38143958	2541	1215	383	124	127	74	0.000254264	0.00238715	0.549	0.643	-0.094	2541	1215	2084	782	127	74	8.55606e-06	0.000136003	0.549	0.608	-0.059	2541	1215	7666	1939	127	74	0	0	0.549	0.697	-0.148	2541	1215	332	99	127	74	4.73516e-05
ENSG00000136110	LECT1	chr13	-	53286850	53287004	53277398	53277942	53298131	53298245	3850	244	5799	0	147	74	0	0	0.888	1	-0.112	3850	244	4887	0	147	74	0	0	0.888	1	-0.112	3850	244	4783	0	147	74	0	0	0.888	1	-0.112	3850	244	5956	0	147	74	0
ENSG00000102580	DNAJC3	chr13	+	96377431	96377506	96375495	96375620	96409897	96410050	138	7	677	0	147	74	3.12676e-05	0.000378981	0.908	1	-0.092	138	7	321	0	147	74	0.000326134	0.00330682	0.908	1	-0.092	138	7	215	0	147	74	0.00131596	0.0104694	0.908	1	-0.092	138	7	224	0	147	74	0.00114305
ENSG00000187498	COL4A1	chr13	-	110864215	110864269	110863993	110864020	110864763	110864826	380	75	491	0	127	74	0	0	0.747	1	-0.253	380	75	495	0	127	74	0	0	0.747	1	-0.253	380	75	566	0	127	74	0	0	0.747	1	-0.253	380	75	232	0	127	74	2.77556e-15
ENSG00000130177	CDC16	chr13	+	115008731	115008823	115007595	115007755	115009330	115009464	75	5	331	0	147	74	0.000348969	0.00313807	0.883	1	-0.117	75	5	116	0	147	74	0.00646455	0.0384542	0.883	1	-0.117	75	5	106	0	147	74	0.00823835	0.0452351	0.883	1	-0.117	75	5	124	0	147	74	0.00538763
ENSG00000165801	ARHGEF40	chr14	+	21544932	21545049	21544721	21544802	21546335	21546366	231	25	754	0	147	74	3.44169e-15	1.43507e-13	0.823	1	-0.177	231	25	347	0	147	74	2.66491e-10	8.49427e-09	0.823	1	-0.177	231	25	199	0	147	74	2.07735e-07	4.42957e-06	0.823	1	-0.177	231	25	246	0	147	74	1.9558e-08
ENSG00000092199	HNRNPC	chr14	-	21679564	21679722	21678771	21679465	21679968	21680082	99	36	120	12	147	74	0.000156803	0.00157267	0.581	0.834	-0.253	99	36	168	0	147	74	6.55032e-15	3.04905e-13	0.581	1	-0.419	99	36	135	0	147	74	5.08926e-13	2.07853e-11	0.581	1	-0.419	99	36	112	2	147	74	3.37171e-09
ENSG00000092199	HNRNPC	chr14	-	21679564	21679725	21677294	21679465	21679968	21680082	133	36	307	12	147	74	2.04116e-09	5.04783e-08	0.65	0.928	-0.278	133	36	396	0	147	74	0	0	0.65	1	-0.35	133	36	360	0	147	74	0	0	0.65	1	-0.35	133	36	335	2	147	74	1.11022e-16
ENSG00000092199	HNRNPC	chr14	-	21679968	21680082	21679564	21679725	21681118	21681276	121	39	290	0	147	74	0	0	0.61	1	-0.39	121	39	426	0	147	74	0	0	0.61	1	-0.39	121	39	394	0	147	74	0	0	0.61	1	-0.39	121	39	389	0	147	74	0
ENSG00000129562	DAD1	chr14	-	23043958	23044133	23033804	23034037	23057936	23058128	889	69	1031	0	147	74	0	0	0.866	1	-0.134	889	69	861	0	147	74	0	0	0.866	1	-0.134	889	69	696	0	147	74	1.11022e-16	5.61547e-15	0.866	1	-0.134	889	69	796	0	147	74	0
ENSG00000100911	PSME2	chr14	-	24614918	24614981	24614587	24614674	24615742	24615814	121	29	214	0	136	74	8.02913e-13	2.82073e-11	0.694	1	-0.306	121	29	51	0	136	74	4.7254e-05	0.000624725	0.694	1	-0.306	121	29	34	0	136	74	0.000805171	0.00699706	0.694	1	-0.306	121	29	56	0	136	74	2.16488e-05
ENSG00000100911	PSME2	chr14	-	24614918	24615449	24614587	24614674	24615742	24615805	163	29	315	0	147	74	1.32672e-13	4.95158e-12	0.739	1	-0.261	163	29	94	0	147	74	2.1503e-06	3.85705e-05	0.739	1	-0.261	163	29	83	0	147	74	7.10852e-06	0.000113326	0.739	1	-0.261	163	29	97	0	147	74	1.56695e-06
ENSG00000100938	GMPR2	chr14	+	24702684	24702792	24702424	24702546	24704942	24705026	46	11	87	0	147	74	1.03163e-05	0.000140921	0.678	1	-0.322	46	11	52	0	147	74	0.000255204	0.00268412	0.678	1	-0.322	46	11	55	0	147	74	0.000185587	0.00202112	0.678	1	-0.322	46	11	49	0	147	74	0.000354377
ENSG00000100938	GMPR2	chr14	+	24702684	24702799	24702424	24702546	24704942	24705022	47	11	89	0	147	74	1.00686e-05	0.000137797	0.683	1	-0.317	47	11	56	0	147	74	0.000186239	0.00205827	0.683	1	-0.317	47	11	58	0	147	74	0.000151948	0.0016953	0.683	1	-0.317	47	11	49	0	147	74	0.000392004
ENSG00000100938	GMPR2	chr14	+	24702684	24702804	24702424	24702546	24704942	24705026	95	11	152	0	147	74	2.4091e-05	0.000300812	0.813	1	-0.187	95	11	101	0	147	74	0.000256156	0.00269227	0.813	1	-0.187	95	11	112	0	147	74	0.000145502	0.00163227	0.813	1	-0.187	95	11	79	0	147	74	0.000894186
ENSG00000100934	SEC23A	chr14	-	39536376	39536500	39534116	39534197	39543618	39543734	321	26	731	5	147	74	1.77131e-09	4.40833e-08	0.861	0.987	-0.126	321	26	631	3	147	74	7.88417e-10	2.38495e-08	0.861	0.991	-0.13	321	26	380	2	147	74	2.02767e-07	4.32739e-06	0.861	0.99	-0.129	321	26	551	2	147	74	1.03738e-09
ENSG00000020577	SAMD4A	chr14	+	55218168	55218255	55215532	55215642	55226878	55227212	339	21	466	0	147	74	3.71811e-08	7.83513e-07	0.89	1	-0.11	339	21	453	0	147	74	4.92179e-08	1.16285e-06	0.89	1	-0.11	339	21	330	0	147	74	9.64271e-07	1.81683e-05	0.89	1	-0.11	339	21	365	0	147	74	3.87511e-07
ENSG00000100567	PSMA3	chr14	+	58730422	58730488	58724642	58724716	58734191	58734238	221	17	511	0	139	74	6.32581e-09	1.47005e-07	0.874	1	-0.126	221	17	193	0	139	74	2.1802e-05	0.00031459	0.874	1	-0.126	221	17	102	0	139	74	0.00105206	0.00873004	0.874	1	-0.126	221	17	174	0	139	74	4.4699e-05
ENSG00000100644	HIF1A	chr14	+	62207222	62207345	62204804	62205091	62211422	62211531	729	111	1498	27	147	74	0	0	0.768	0.965	-0.197	729	111	1192	33	147	74	0	0	0.768	0.948	-0.18	729	111	988	32	147	74	2.22045e-16	1.10269e-14	0.768	0.94	-0.172	729	111	827	32	147	74	5.96079e-13
ENSG00000100644	HIF1A	chr14	+	62207472	62207906	62204804	62205091	62211422	62211531	997	111	1811	27	147	74	0	0	0.819	0.971	-0.152	997	111	1636	33	147	74	0	0	0.819	0.961	-0.142	997	111	1436	32	147	74	0	0	0.819	0.958	-0.139	997	111	1155	32	147	74	1.34892e-13
ENSG00000072042	RDH11	chr14	-	68156928	68157138	68143517	68145140	68162346	68162483	4	14	31	0	147	74	3.28979e-09	7.93889e-08	0.126	1	-0.874	4	14	17	0	147	74	9.11138e-07	1.74988e-05	0.126	1	-0.874	4	14	23	0	147	74	6.1174e-08	1.43158e-06	0.126	1	-0.874	4	14	26	0	147	74	1.89615e-08
ENSG00000197555	SIPA1L1	chr14	+	72196771	72197018	72191386	72191552	72200382	72200529	159	7	420	1	147	74	0.000733365	0.00590476	0.92	0.995	-0.075	159	7	297	0	147	74	0.000829781	0.00727004	0.92	1	-0.08	159	7	183	0	147	74	0.00394187	0.0254253	0.92	1	-0.08	159	7	301	0	147	74	0.000794102
ENSG00000119689	DLST	chr14	+	75352288	75352337	75348617	75348719	75355797	75355850	0	13	29	7	122	74	1.86814e-07	3.5526e-06	0	0.715	-0.715	0	13	24	23	122	74	0.000244595	0.00259055	0	0.388	-0.388	0	13	26	22	122	74	0.000123911	0.00142513	0	0.418	-0.418	0	13	23	9	122	74	3.99761e-06
ENSG00000214548	MEG3	chr14	+	101298848	101298978	101297757	101297871	101300968	101301088	34	144	30	18	147	74	1.76272e-08	3.86174e-07	0.106	0.456	-0.35	34	144	66	72	147	74	5.4547e-08	1.27935e-06	0.106	0.316	-0.21	34	144	64	13	147	74	0	0	0.106	0.713	-0.607	34	144	92	39	147	74	0
ENSG00000214548	MEG3	chr14	+	101302072	101302216	101297757	101297871	101302503	101302637	423	389	460	140	147	74	0	0	0.354	0.623	-0.269	423	389	1543	607	147	74	0	0	0.354	0.561	-0.207	423	389	1248	395	147	74	0	0	0.354	0.614	-0.26	423	389	1060	381	147	74	0
ENSG00000214548	MEG3	chr14	+	101302075	101302216	101295370	101297871	101302503	101302637	435	389	463	140	147	74	0	0	0.36	0.625	-0.265	435	389	1550	607	147	74	0	0	0.36	0.562	-0.202	435	389	1251	395	147	74	0	0	0.36	0.615	-0.255	435	389	1077	381	147	74	0
ENSG00000203485	INF2	chr14	+	105175007	105175069	105174772	105174924	105175617	105175720	238	13	312	0	135	74	2.90252e-05	0.00035425	0.909	1	-0.091	238	13	368	0	135	74	1.08145e-05	0.000168037	0.909	1	-0.091	238	13	209	0	135	74	0.000268135	0.00276472	0.909	1	-0.091	238	13	278	0	135	74	5.66249e-05
ENSG00000203485	INF2	chr14	+	105181620	105181677	105180539	105181193	105185131	105185940	12	111	69	95	130	74	3.78023e-10	1.02036e-08	0.058	0.293	-0.235	12	111	27	92	130	74	0.00613811	0.0369511	0.058	0.143	-0.085	12	111	18	49	130	74	0.0027659	0.0191477	0.058	0.173	-0.115	12	111	41	53	130	74	7.63833e-09
ENSG00000182979	MTA1	chr14	+	105916597	105916661	105916394	105916521	105920529	105920647	263	13	378	0	137	74	1.93016e-05	0.000247323	0.916	1	-0.084	263	13	412	0	137	74	1.16433e-05	0.000179333	0.916	1	-0.084	263	13	357	0	137	74	2.6887e-05	0.000370027	0.916	1	-0.084	263	13	264	0	137	74	0.000144022
ENSG00000140307	GTF2A2	chr15	-	59942867	59942963	59934412	59934461	59949604	59949674	133	21	427	0	147	74	4.16778e-13	1.48782e-11	0.761	1	-0.239	133	21	179	5	147	74	0.000150302	0.00171903	0.761	0.947	-0.186	133	21	142	3	147	74	0.000123288	0.00141897	0.761	0.96	-0.199	133	21	175	9	147	74	0.00508145
ENSG00000140416	TPM1	chr15	+	63353396	63353472	63353067	63353138	63353911	63353978	94	733	260	64	147	74	0	0	0.061	0.672	-0.611	94	733	76	33	147	74	0	0	0.061	0.537	-0.476	94	733	74	56	147	74	0	0	0.061	0.399	-0.338	94	733	63	14	147	74	0
ENSG00000140416	TPM1	chr15	+	63353396	63353472	63353067	63353138	63354413	63354476	167	16	588	0	147	74	2.0553e-10	5.73207e-09	0.84	1	-0.16	167	16	177	0	147	74	8.74283e-06	0.000138448	0.84	1	-0.16	167	16	153	0	147	74	2.52501e-05	0.000350143	0.84	1	-0.16	167	16	135	0	147	74	5.95462e-05
ENSG00000140416	TPM1	chr15	+	63354413	63354476	63353911	63353987	63354774	63354844	1670	68	525	0	136	74	3.6368e-08	7.68607e-07	0.93	1	-0.07	1670	68	229	0	136	74	0.000162966	0.0018396	0.93	1	-0.07	1670	68	292	0	136	74	2.34735e-05	0.000328936	0.93	1	-0.07	1670	68	192	0	136	74	0.000533451
ENSG00000140416	TPM1	chr15	+	63354774	63354844	63354413	63354476	63356262	63356341	1373	58	416	0	143	74	4.79162e-07	8.57368e-06	0.925	1	-0.075	1373	58	159	0	143	74	0.00129205	0.0104981	0.925	1	-0.075	1373	58	197	0	143	74	0.000356648	0.00353445	0.925	1	-0.075	1373	58	152	0	143	74	0.00164771
ENSG00000166855	CLPX	chr15	-	65445884	65445977	65442851	65443251	65447119	65447419	148	9	163	0	147	74	0.00096708	0.00747878	0.892	1	-0.108	148	9	232	0	147	74	0.000206752	0.00224266	0.892	1	-0.108	148	9	158	0	147	74	0.00110001	0.00904529	0.892	1	-0.108	148	9	158	0	147	74	0.00110001
ENSG00000174444	RPL4	chr15	-	66792630	66792714	66792395	66792514	66793286	66793443	375	37	320	0	147	74	2.60253e-10	7.17176e-09	0.836	1	-0.164	375	37	585	29	147	74	0.00736531	0.0425739	0.836	0.91	-0.074	375	37	575	23	147	74	0.00083767	0.00723374	0.836	0.926	-0.09	375	37	501	0	147	74	1.29674e-13
ENSG00000166233	ARIH1	chr15	+	72873071	72873332	72853792	72853890	72874415	72874528	196	28	248	0	147	74	2.41508e-10	6.68416e-09	0.779	1	-0.221	196	28	343	0	147	74	1.78779e-12	7.05822e-11	0.779	1	-0.221	196	28	292	0	147	74	2.18678e-11	7.88428e-10	0.779	1	-0.221	196	28	269	0	147	74	7.44174e-11
ENSG00000173546	CSPG4	chr15	-	75970043	75970227	75966662	75969725	75974633	75974800	3958	246	5851	0	147	74	0	0	0.89	1	-0.11	3958	246	4122	0	147	74	0	0	0.89	1	-0.11	3958	246	1921	0	147	74	0	0	0.89	1	-0.11	3958	246	3103	0	147	74	0
ENSG00000140374	ETFA	chr15	-	76584771	76584854	76580186	76580286	76603690	76603755	192	9	317	0	147	74	0.000218102	0.00209178	0.915	1	-0.085	192	9	152	0	147	74	0.00389971	0.0257222	0.915	1	-0.085	192	9	171	0	147	74	0.00255921	0.0180004	0.915	1	-0.085	192	9	133	0	147	74	0.00614197
ENSG00000140395	WDR61	chr15	-	78585508	78585614	78584957	78585227	78587287	78587315	116	8	283	0	147	74	6.47849e-05	0.000722088	0.88	1	-0.12	116	8	93	0	147	74	0.00577685	0.0352112	0.88	1	-0.12	116	8	103	0	147	74	0.00406178	0.026018	0.88	1	-0.12	116	8	108	0	147	74	0.0034319
ENSG00000140612	SEC11A	chr15	-	85230855	85231005	85213955	85214013	85259255	85259298	54	292	48	84	147	74	1.90632e-06	3.03709e-05	0.085	0.223	-0.138	54	292	41	95	147	74	0.000479745	0.00456033	0.085	0.178	-0.093	54	292	50	146	147	74	0.00569635	0.033921	0.085	0.147	-0.062	54	292	38	0	147	74	0
ENSG00000140612	SEC11A	chr15	-	85234765	85234875	85213955	85214013	85259255	85259947	835	292	692	84	147	74	1.11022e-16	5.06521e-15	0.59	0.806	-0.216	835	292	643	95	147	74	3.7621e-12	1.45272e-10	0.59	0.773	-0.183	835	292	805	146	147	74	3.10081e-09	8.71383e-08	0.59	0.735	-0.145	835	292	693	0	147	74	0
ENSG00000073417	PDE8A	chr15	+	85626786	85626875	85619963	85620018	85643245	85643297	59	10	132	0	147	74	8.13307e-06	0.000114038	0.748	1	-0.252	59	10	104	0	147	74	3.56148e-05	0.000485544	0.748	1	-0.252	59	10	45	0	147	74	0.00269767	0.0187681	0.748	1	-0.252	59	10	85	0	147	74	0.000115047
ENSG00000172183	ISG20	chr15	+	89182573	89182825	89182171	89182307	89195340	89195541	2132	173	403	0	147	74	3.53162e-13	1.27324e-11	0.861	1	-0.139	2132	173	1089	0	147	74	0	0	0.861	1	-0.139	2132	173	526	0	147	74	2.22045e-16	1.10269e-14	0.861	1	-0.139	2132	173	984	0	147	74	0
ENSG00000140545	MFGE8	chr15	-	89444781	89444966	89442886	89443042	89448987	89449132	1189	55	1292	0	147	74	4.44089e-16	1.97645e-14	0.916	1	-0.084	1189	55	1580	1	147	74	0	0	0.916	0.999	-0.083	1189	55	816	0	147	74	5.04063e-12	1.9097e-10	0.916	1	-0.084	1189	55	1102	0	147	74	1.39888e-14
ENSG00000185033	SEMA4B	chr15	+	90766790	90766972	90764845	90764997	90767069	90767220	133	12	84	0	147	74	0.00183127	0.0126589	0.848	1	-0.152	133	12	448	0	147	74	6.09169e-08	1.42142e-06	0.848	1	-0.152	133	12	141	0	147	74	0.000131662	0.00149783	0.848	1	-0.152	133	12	90	0	147	74	0.0013373
ENSG00000140575	IQGAP1	chr15	+	90969341	90969498	90934005	90934105	90972820	90972898	222	11	510	0	147	74	6.69089e-06	9.57159e-05	0.91	1	-0.09	222	11	401	0	147	74	2.38281e-05	0.000339165	0.91	1	-0.09	222	11	290	0	147	74	0.000126606	0.0014506	0.91	1	-0.09	222	11	272	0	147	74	0.000174038
ENSG00000005339	CREBBP	chr16	-	3786650	3786816	3786036	3786204	3789578	3789725	95	8	379	0	147	74	5.31539e-06	7.78336e-05	0.857	1	-0.143	95	8	240	0	147	74	4.61515e-05	0.00061163	0.857	1	-0.143	95	8	170	0	147	74	0.000227851	0.00240625	0.857	1	-0.143	95	8	191	0	147	74	0.00013408
ENSG00000103489	XYLT1	chr16	-	17221522	17221718	17211502	17211836	17228329	17228592	360	21	1244	0	147	74	3.02924e-12	1.02255e-10	0.896	1	-0.104	360	21	924	7	147	74	4.46529e-07	9.15889e-06	0.896	0.985	-0.089	360	21	587	9	147	74	0.000535722	0.00497078	0.896	0.97	-0.074	360	21	801	8	147	74	7.4083e-06
ENSG00000077235	GTF3C1	chr16	-	27523069	27523222	27518167	27518477	27539918	27540042	55	7	181	0	147	74	3.73322e-05	0.000443298	0.798	1	-0.202	55	7	155	0	147	74	7.64069e-05	0.000950101	0.798	1	-0.202	55	7	73	0	147	74	0.00190297	0.0141491	0.798	1	-0.202	55	7	107	0	147	74	0.00039839
ENSG00000140682	TGFB1I1	chr16	+	31485883	31486078	31485670	31485776	31487332	31487506	268	8	218	0	147	74	0.00846772	0.0433353	0.944	1	-0.056	268	8	340	0	147	74	0.00232954	0.017007	0.944	1	-0.056	268	8	280	0	147	74	0.00414477	0.0264463	0.944	1	-0.056	268	8	246	0	147	74	0.00602882
ENSG00000167526	RPL13	chr16	+	89627347	89627471	89627064	89627120	89627634	89627776	331	165	293	0	147	74	0	0	0.502	1	-0.498	331	165	564	0	147	74	0	0	0.502	1	-0.498	331	165	770	0	147	74	0	0	0.502	1	-0.498	331	165	523	0	147	74	0
ENSG00000167526	RPL13	chr16	+	89627361	89627471	89627088	89627120	89627634	89627776	106	165	154	0	147	74	0	0	0.244	1	-0.756	106	165	339	0	147	74	0	0	0.244	1	-0.756	106	165	436	0	147	74	0	0	0.244	1	-0.756	106	165	277	0	147	74	0
ENSG00000141002	TCF25	chr16	+	89967042	89967202	89965174	89965280	89970525	89970613	351	35	588	0	147	74	9.54792e-15	3.86398e-13	0.835	1	-0.165	351	35	344	0	147	74	9.98851e-11	3.34796e-09	0.835	1	-0.165	351	35	262	0	147	74	5.2631e-09	1.4224e-07	0.835	1	-0.165	351	35	269	0	147	74	3.66842e-09
ENSG00000264772	RP11-186B7.4	chr17	+	7479847	7480008	7478436	7478576	7480373	7480483	15	42	319	33	147	74	0	0	0.152	0.83	-0.678	15	42	314	5	147	74	0	0	0.152	0.969	-0.817	15	42	249	8	147	74	0	0	0.152	0.94	-0.788	15	42	216	9	147	74	0
ENSG00000264772	RP11-186B7.4	chr17	+	7479847	7480010	7478436	7478576	7480373	7480483	810	42	1959	33	147	74	2.27867e-06	3.57214e-05	0.907	0.968	-0.061	810	42	1504	5	147	74	2.87548e-14	1.27026e-12	0.907	0.993	-0.086	810	42	1386	8	147	74	1.44111e-11	5.28094e-10	0.907	0.989	-0.082	810	42	1210	9	147	74	1.11742e-09
ENSG00000264772	RP11-186B7.4	chr17	+	7479847	7480014	7478436	7478576	7480373	7480483	1	42	319	33	147	74	0	0	0.012	0.83	-0.818	1	42	289	5	147	74	0	0	0.012	0.967	-0.955	1	42	242	8	147	74	0	0	0.012	0.938	-0.926	1	42	208	9	147	74	0
ENSG00000072310	SREBF1	chr17	-	17726831	17726921	17723403	17723835	17740040	17740301	0	26	25	81	147	74	0.00115308	0.00866816	0	0.134	-0.134	0	26	23	85	147	74	0.00226186	0.0165749	0	0.12	-0.12	0	26	13	41	147	74	0.00189624	0.014114	0	0.138	-0.138	0	26	13	36	147	74	0.00109925
ENSG00000141127	PRPSAP2	chr17	+	18793134	18793190	18785880	18785996	18814415	18814564	54	9	147	0	129	74	8.12974e-06	0.000114023	0.775	1	-0.225	54	9	151	0	129	74	6.93943e-06	0.0001124	0.775	1	-0.225	54	9	81	0	129	74	0.000219433	0.00233194	0.775	1	-0.225	54	9	90	0	129	74	0.000127071
ENSG00000109046	WSB1	chr17	+	25637161	25637204	25636125	25636298	25638534	25638642	0	31	40	17	116	74	4.11637e-12	1.37402e-10	0	0.6	-0.6	0	31	211	40	116	74	0	0	0	0.771	-0.771	0	31	76	23	116	74	7.77156e-16	3.72777e-14	0	0.678	-0.678	0	31	107	15	116	74	0
ENSG00000109113	RAB34	chr17	-	27042473	27042525	27042212	27042294	27042658	27042723	505	20	726	0	125	74	3.1065e-07	5.72772e-06	0.937	1	-0.063	505	20	549	0	125	74	2.53818e-06	4.4923e-05	0.937	1	-0.063	505	20	437	0	125	74	1.29221e-05	0.000192304	0.937	1	-0.063	505	20	361	0	125	74	4.61987e-05
ENSG00000141756	FKBP10	chr17	+	39975781	39976301	39975461	39975651	39976520	39976713	544	60	800	17	147	74	8.61292e-11	2.50652e-09	0.82	0.959	-0.139	544	60	913	50	147	74	0.000447479	0.0043061	0.82	0.902	-0.082	544	60	1186	23	147	74	1.249e-13	5.28078e-12	0.82	0.963	-0.143	544	60	658	22	147	74	7.73094e-07
ENSG00000121073	SLC35B1	chr17	-	47781461	47781588	47780549	47780656	47782485	47783671	270	11	1095	0	147	74	1.04024e-06	1.74678e-05	0.925	1	-0.075	270	11	476	0	147	74	3.96164e-05	0.000533965	0.925	1	-0.075	270	11	289	0	147	74	0.000413205	0.00399989	0.925	1	-0.075	270	11	299	0	147	74	0.000354538
ENSG00000108821	COL1A1	chr17	-	48266737	48266899	48266263	48266371	48267039	48267093	4748	139	2957	0	147	74	0	0	0.945	1	-0.055	4748	139	8794	0	147	74	0	0	0.945	1	-0.055	4748	139	27266	0	147	74	0	0	0.945	1	-0.055	4748	139	2321	0	147	74	0
ENSG00000108821	COL1A1	chr17	-	48267361	48267469	48267039	48267093	48267687	48267741	3925	479	2733	0	147	74	0	0	0.805	1	-0.195	3925	479	10057	0	147	74	0	0	0.805	1	-0.195	3925	479	26396	0	147	74	0	0	0.805	1	-0.195	3925	479	1925	0	147	74	0
ENSG00000011260	UTP18	chr17	+	49353226	49353352	49350722	49350811	49354490	49354665	203	10	405	0	147	74	3.57051e-05	0.000426366	0.911	1	-0.089	203	10	189	0	147	74	0.00116	0.00958343	0.911	1	-0.089	203	10	145	0	147	74	0.0032902	0.0220035	0.911	1	-0.089	203	10	189	0	147	74	0.00116
ENSG00000141378	PTRH2	chr17	-	57776231	57777550	57774668	57775339	57784731	57784790	1	79	28	161	147	74	0.000190122	0.00186421	0.006	0.081	-0.075	1	79	38	105	147	74	6.04443e-08	1.411e-06	0.006	0.154	-0.148	1	79	27	70	147	74	1.20021e-07	2.67635e-06	0.006	0.163	-0.157	1	79	44	129	147	74	7.63137e-08
ENSG00000087191	PSMC5	chr17	+	61907492	61907549	61907211	61907309	61907630	61907861	366	21	1497	13	130	74	1.35782e-07	2.64138e-06	0.908	0.985	-0.077	366	21	415	4	130	74	0.000167902	0.00188712	0.908	0.983	-0.075	366	21	309	0	130	74	4.28894e-06	7.1697e-05	0.908	1	-0.092	366	21	410	0	130	74	3.8817e-07
ENSG00000108946	PRKAR1A	chr17	+	66511127	66511260	66508590	66508689	66511534	66511717	7	153	124	382	147	74	4.45719e-10	1.19085e-08	0.023	0.14	-0.117	7	153	85	231	147	74	1.24835e-10	4.14858e-09	0.023	0.156	-0.133	7	153	37	141	147	74	3.3025e-06	5.63946e-05	0.023	0.117	-0.094	7	153	37	207	147	74	0.000355558
ENSG00000069188	SDK2	chr17	-	71354217	71354343	71348611	71348776	71364545	71364732	291	13	426	0	147	74	1.81235e-05	0.000234055	0.918	1	-0.082	291	13	361	0	147	74	4.65757e-05	0.000616654	0.918	1	-0.082	291	13	163	0	147	74	0.0023357	0.0167163	0.918	1	-0.082	291	13	268	0	147	74	0.00023149
ENSG00000185624	P4HB	chr17	-	79813017	79813155	79805118	79805223	79817056	79817263	2159	124	3052	10	147	74	0	0	0.898	0.994	-0.096	2159	124	3627	17	147	74	0	0	0.898	0.991	-0.093	2159	124	2612	12	147	74	0	0	0.898	0.991	-0.093	2159	124	2255	9	147	74	0
ENSG00000141526	SLC16A3	chr17	+	80194560	80194748	80193858	80194107	80195013	80195196	501	81	276	0	147	74	2.33147e-15	9.85884e-14	0.757	1	-0.243	501	81	1245	97	147	74	6.99913e-06	0.000113232	0.757	0.866	-0.109	501	81	801	76	147	74	0.00175441	0.0132446	0.757	0.841	-0.084	501	81	1006	77	147	74	1.04218e-05
ENSG00000141526	SLC16A3	chr17	+	80194588	80194748	80193858	80194107	80195013	80195053	502	81	276	0	147	74	2.44249e-15	1.03112e-13	0.757	1	-0.243	502	81	1252	97	147	74	6.29757e-06	0.000102827	0.757	0.867	-0.11	502	81	798	76	147	74	0.00196612	0.014533	0.757	0.841	-0.084	502	81	998	77	147	74	1.3625e-05
ENSG00000141562	NARF	chr17	+	80426639	80426772	80417867	80417948	80436675	80436794	11	4	45	0	147	74	0.00174462	0.0121657	0.581	1	-0.419	11	4	90	0	147	74	0.000186035	0.00205666	0.581	1	-0.419	11	4	72	0	147	74	0.000387512	0.00378466	0.581	1	-0.419	11	4	43	0	147	74	0.00200486
ENSG00000141580	WDR45B	chr17	-	80575171	80575273	80574399	80574521	80576918	80577004	268	13	180	0	147	74	0.00100657	0.00774297	0.912	1	-0.088	268	13	802	0	147	74	2.05695e-07	4.43744e-06	0.912	1	-0.088	268	13	491	0	147	74	4.02436e-06	6.76878e-05	0.912	1	-0.088	268	13	388	0	147	74	1.67111e-05
ENSG00000176890	TYMS	chr18	+	662145	662320	657742	657947	669071	669464	194	10	405	0	147	74	2.64209e-05	0.000326538	0.907	1	-0.093	194	10	302	0	147	74	0.000110408	0.00131195	0.907	1	-0.093	194	10	240	0	147	74	0.000324187	0.00325669	0.907	1	-0.093	194	10	245	0	147	74	0.000294982
ENSG00000101558	VAPA	chr18	+	9936106	9936210	9931773	9931959	9936982	9937063	385	21	624	0	147	74	9.54771e-09	2.16827e-07	0.902	1	-0.098	385	21	806	10	147	74	7.91241e-05	0.000978985	0.902	0.976	-0.074	385	21	668	10	147	74	0.000584839	0.00535683	0.902	0.971	-0.069	385	21	786	5	147	74	8.52231e-07
ENSG00000141385	AFG3L2	chr18	-	12353003	12353157	12351304	12351412	12356692	12356830	96	11	285	0	147	74	4.02948e-07	7.28945e-06	0.815	1	-0.185	96	11	174	0	147	74	1.10183e-05	0.00017066	0.815	1	-0.185	96	11	113	0	147	74	0.000146674	0.00164316	0.815	1	-0.185	96	11	203	0	147	74	4.04477e-06
ENSG00000101782	RIOK3	chr18	+	21053392	21053447	21047362	21047490	21054911	21055071	101	8	133	0	128	74	0.000935277	0.00727174	0.88	1	-0.12	101	8	315	0	128	74	2.23853e-05	0.000321647	0.88	1	-0.12	101	8	166	0	128	74	0.000373975	0.00367435	0.88	1	-0.12	101	8	190	0	128	74	0.000209422
ENSG00000101782	RIOK3	chr18	+	21053392	21053590	21047362	21047490	21054911	21055071	227	8	283	0	147	74	0.00192917	0.0132082	0.935	1	-0.065	227	8	596	0	147	74	0.000174715	0.00195364	0.935	1	-0.065	227	8	346	0	147	74	0.00099534	0.00834414	0.935	1	-0.065	227	8	378	0	147	74	0.000742584
ENSG00000167306	MYO5B	chr18	-	47516808	47516890	47511087	47511163	47518657	47518801	110	18	112	0	147	74	3.38862e-06	5.15026e-05	0.755	1	-0.245	110	18	226	0	147	74	3.4637e-09	9.65398e-08	0.755	1	-0.245	110	18	135	0	147	74	6.44074e-07	1.25039e-05	0.755	1	-0.245	110	18	247	0	147	74	1.29333e-09
ENSG00000119541	VPS4B	chr18	-	61078699	61078811	61077522	61077679	61089465	61089696	70	7	358	0	147	74	6.13587e-06	8.84977e-05	0.834	1	-0.166	70	7	182	0	147	74	0.000116939	0.00137666	0.834	1	-0.166	70	7	91	0	147	74	0.00199558	0.0146999	0.834	1	-0.166	70	7	194	0	147	74	8.85185e-05
ENSG00000099622	CIRBP	chr19	+	1272425	1272517	1271979	1272050	1274305	1274580	917	289	739	71	147	74	0	0	0.615	0.84	-0.225	917	289	1133	241	147	74	5.86083e-05	0.00075509	0.615	0.703	-0.088	917	289	942	193	147	74	3.0825e-05	0.00041872	0.615	0.711	-0.096	917	289	1113	152	147	74	6.88338e-15
ENSG00000099622	CIRBP	chr19	+	1272425	1272522	1271979	1272050	1274305	1274580	921	289	740	71	147	74	0	0	0.616	0.84	-0.224	921	289	1134	241	147	74	6.77835e-05	0.000856328	0.616	0.703	-0.087	921	289	942	193	147	74	3.6945e-05	0.000490212	0.616	0.711	-0.095	921	289	1115	152	147	74	8.10463e-15
ENSG00000099783	HNRNPM	chr19	+	8528380	8528388	8527412	8527465	8528476	8528570	19	24	182	0	81	74	0	0	0.42	1	-0.58	19	24	47	0	81	74	9.82158e-11	3.29605e-09	0.42	1	-0.58	19	24	32	0	81	74	1.71083e-08	4.33361e-07	0.42	1	-0.58	19	24	66	0	81	74	5.40457e-13
ENSG00000129351	ILF3	chr19	+	10790491	10790603	10789772	10789868	10791694	10791806	567	18	969	0	147	74	4.7245e-07	8.46549e-06	0.941	1	-0.059	567	18	950	0	147	74	5.38545e-07	1.08787e-05	0.941	1	-0.059	567	18	954	0	147	74	5.23775e-07	1.02944e-05	0.941	1	-0.059	567	18	657	0	147	74	6.22563e-06
ENSG00000130164	LDLR	chr19	+	11233849	11234020	11227534	11227674	11240188	11240346	12	12	41	0	147	74	4.20965e-07	7.5911e-06	0.335	1	-0.665	12	12	90	0	147	74	3.25572e-10	1.02517e-08	0.335	1	-0.665	12	12	77	0	147	74	1.48231e-09	4.31149e-08	0.335	1	-0.665	12	12	39	0	147	74	6.34403e-07
ENSG00000126261	UBA2	chr19	+	34954930	34955036	34951374	34951471	34957782	34957919	420	24	594	0	147	74	3.37425e-09	8.12727e-08	0.898	1	-0.102	420	24	536	0	147	74	1.04898e-08	2.74306e-07	0.898	1	-0.102	420	24	455	0	147	74	5.97303e-08	1.40246e-06	0.898	1	-0.102	420	24	513	0	147	74	1.68575e-08
ENSG00000089351	GRAMD1A	chr19	+	35514330	35514451	35514139	35514247	35516952	35517373	566	20	343	0	147	74	0.000116782	0.00121562	0.934	1	-0.066	566	20	559	0	147	74	4.35177e-06	7.38151e-05	0.934	1	-0.066	566	20	416	0	147	74	3.42932e-05	0.000460103	0.934	1	-0.066	566	20	290	0	147	74	0.000310981
ENSG00000266964	FXYD1	chr19	+	35630887	35631044	35629711	35629798	35631500	35631533	241	31	86	0	147	74	6.23931e-05	0.00069849	0.796	1	-0.204	241	31	108	0	147	74	9.19741e-06	0.000144848	0.796	1	-0.204	241	31	226	0	147	74	2.09138e-09	5.99099e-08	0.796	1	-0.204	241	31	100	0	147	74	1.81483e-05
ENSG00000266964	FXYD1	chr19	+	35630979	35631044	35629744	35629798	35631500	35631533	347	31	134	0	138	74	3.20362e-05	0.000387052	0.857	1	-0.143	347	31	156	0	138	74	8.84204e-06	0.000139775	0.857	1	-0.143	347	31	334	0	138	74	1.83663e-09	5.28893e-08	0.857	1	-0.143	347	31	144	0	138	74	1.76932e-05
ENSG00000179134	SAMD4B	chr19	+	39866289	39866364	39860294	39860765	39866441	39866529	181	8	160	0	147	74	0.00484294	0.0278972	0.919	1	-0.081	181	8	195	0	147	74	0.00250424	0.0180245	0.919	1	-0.081	181	8	180	0	147	74	0.00328608	0.0219819	0.919	1	-0.081	181	8	147	0	147	74	0.00634106
ENSG00000130203	APOE	chr19	+	45409843	45409924	45409047	45409098	45411016	45411209	200	44	190	0	147	74	8.62754e-13	3.02261e-11	0.696	1	-0.304	200	44	91	0	147	74	1.26947e-07	2.83842e-06	0.696	1	-0.304	200	44	139	0	147	74	2.53404e-10	8.11387e-09	0.696	1	-0.304	200	44	118	0	147	74	3.41089e-09
ENSG00000130203	APOE	chr19	+	45409858	45409924	45409010	45409098	45411016	45411209	325	44	268	0	139	74	9.19009e-12	2.96637e-10	0.797	1	-0.203	325	44	126	0	139	74	6.06435e-07	1.21023e-05	0.797	1	-0.203	325	44	189	0	139	74	2.92783e-09	8.25732e-08	0.797	1	-0.203	325	44	168	0	139	74	1.59353e-08
ENSG00000125740	FOSB	chr19	+	45974003	45974207	45971252	45971970	45975808	45978436	16	33	11	0	147	74	2.59105e-05	0.000321088	0.196	1	-0.804	16	33	628	0	147	74	0	0	0.196	1	-0.804	16	33	317	0	147	74	0	0	0.196	1	-0.804	16	33	357	0	147	74	0
ENSG00000125753	VASP	chr19	+	46027827	46027918	46027354	46027400	46029203	46029261	361	24	472	0	147	74	5.93443e-09	1.38352e-07	0.883	1	-0.117	361	24	478	0	147	74	5.14148e-09	1.40576e-07	0.883	1	-0.117	361	24	444	0	147	74	1.17908e-08	3.05407e-07	0.883	1	-0.117	361	24	622	0	147	74	2.31107e-10
ENSG00000063177	RPL18	chr19	-	49119335	49119459	49119133	49119203	49119982	49120081	16561	803	7954	0	147	74	0	0	0.912	1	-0.088	16561	803	13025	3	147	74	0	0	0.912	1	-0.088	16561	803	15617	0	147	74	0	0	0.912	1	-0.088	16561	803	10937	3	147	74	0
ENSG00000105559	PLEKHA4	chr19	-	49360678	49360753	49357473	49357521	49362116	49362396	73	69	264	57	147	74	2.29724e-11	7.12999e-10	0.348	0.7	-0.352	73	69	133	41	147	74	3.5743e-06	6.14872e-05	0.348	0.62	-0.272	73	69	73	27	147	74	0.000681394	0.00606952	0.348	0.576	-0.228	73	69	65	21	147	74	0.000257329
ENSG00000087088	BAX	chr19	+	49458804	49459090	49458153	49458219	49459454	49459590	224	18	426	0	147	74	1.23583e-08	2.75731e-07	0.862	1	-0.138	224	18	124	0	147	74	0.00025448	0.00267761	0.862	1	-0.138	224	18	142	0	147	74	0.000109161	0.00127486	0.862	1	-0.138	224	18	127	0	147	74	0.000220198
ENSG00000087088	BAX	chr19	+	49458943	49459090	49458185	49458219	49459454	49459590	197	18	434	0	147	74	2.34261e-09	5.75693e-08	0.846	1	-0.154	197	18	119	0	147	74	0.000146817	0.00168517	0.846	1	-0.154	197	18	139	0	147	74	5.22462e-05	0.000665953	0.846	1	-0.154	197	18	134	0	147	74	6.71782e-05
ENSG00000104852	SNRNP70	chr19	+	49605370	49605430	49604646	49604728	49607890	49607992	9	390	171	850	133	74	0	0	0.013	0.101	-0.088	9	390	80	426	133	74	2.61791e-13	1.08948e-11	0.013	0.095	-0.082	9	390	93	352	133	74	0	0	0.013	0.128	-0.115	9	390	90	379	133	74	0
ENSG00000104852	SNRNP70	chr19	+	49605370	49605442	49604646	49604728	49607890	49607992	2	390	179	850	145	74	0	0	0.003	0.097	-0.094	2	390	88	426	145	74	0	0	0.003	0.095	-0.092	2	390	86	352	145	74	0	0	0.003	0.111	-0.108	2	390	95	379	145	74	0
ENSG00000104852	SNRNP70	chr19	+	49605370	49606844	49604646	49604728	49607890	49607992	7	390	197	850	147	74	0	0	0.009	0.104	-0.095	7	390	97	426	147	74	0	0	0.009	0.103	-0.094	7	390	91	352	147	74	0	0	0.009	0.115	-0.106	7	390	95	379	147	74	0
ENSG00000170906	NDUFA3	chr19	+	54609240	54609318	54606421	54606496	54610117	54610268	229	31	383	0	147	74	2.52687e-13	9.19469e-12	0.788	1	-0.212	229	31	191	5	147	74	0.000108067	0.00128806	0.788	0.951	-0.163	229	31	180	5	147	74	0.000207403	0.00221991	0.788	0.948	-0.16	229	31	174	0	147	74	3.30318e-08
ENSG00000138029	HADHB	chr2	+	26501481	26501669	26496518	26496618	26502002	26502183	137	10	275	0	147	74	2.03942e-05	0.000259192	0.873	1	-0.127	137	10	169	0	147	74	0.000260628	0.00273296	0.873	1	-0.127	137	10	147	0	147	74	0.000508888	0.00475858	0.873	1	-0.127	137	10	128	0	147	74	0.000957077
ENSG00000213639	PPP1CB	chr2	+	29006772	29006844	29004603	29004708	29011523	29011675	750	39	1132	0	145	74	2.15383e-14	8.54645e-13	0.908	1	-0.092	750	39	1600	0	145	74	0	0	0.908	1	-0.092	750	39	1106	0	145	74	3.25295e-14	1.4205e-12	0.908	1	-0.092	750	39	1303	0	145	74	1.77636e-15
ENSG00000119801	YPEL5	chr2	+	30379493	30379658	30371110	30371407	30381484	30382417	364	23	241	0	147	74	8.77273e-06	0.000121765	0.888	1	-0.112	364	23	612	0	147	74	8.28006e-10	2.49641e-08	0.888	1	-0.112	364	23	618	6	147	74	5.50313e-06	8.99472e-05	0.888	0.981	-0.093	364	23	465	0	147	74	1.74128e-08
ENSG00000115816	CEBPZ	chr2	-	37454686	37456179	37450312	37450544	37458554	37458856	195	18	388	0	147	74	6.5418e-09	1.51678e-07	0.845	1	-0.155	195	18	452	14	147	74	0.00310916	0.0214646	0.845	0.942	-0.097	195	18	339	0	147	74	2.51848e-08	6.2472e-07	0.845	1	-0.155	195	18	475	13	147	74	0.00119442
ENSG00000115816	CEBPZ	chr2	-	37456091	37456179	37450312	37450544	37458554	37458856	91	18	203	0	147	74	1.45888e-09	3.66665e-08	0.718	1	-0.282	91	18	211	14	147	74	0.00411472	0.0268741	0.718	0.884	-0.166	91	18	166	0	147	74	1.34632e-08	3.45453e-07	0.718	1	-0.282	91	18	228	13	147	74	0.00127803
ENSG00000173209	AHSA2	chr2	+	61408454	61408540	61406115	61406306	61411846	61411935	120	9	321	0	147	74	1.24335e-05	0.000165834	0.87	1	-0.13	120	9	286	0	147	74	2.24374e-05	0.000322142	0.87	1	-0.13	120	9	226	0	147	74	7.34507e-05	0.000897642	0.87	1	-0.13	120	9	204	0	147	74	0.00012146
ENSG00000173163	COMMD1	chr2	+	62227835	62228117	62132781	62132993	62362965	62363382	160	11	319	0	147	74	8.51356e-06	0.000118653	0.88	1	-0.12	160	11	108	0	147	74	0.00225786	0.0165501	0.88	1	-0.12	160	11	122	0	147	74	0.00133887	0.0106053	0.88	1	-0.12	160	11	89	0	147	74	0.00486511
ENSG00000065911	MTHFD2	chr2	+	74437068	74437176	74435695	74435848	74438325	74438418	1793	164	1300	6	147	74	0	0	0.846	0.991	-0.145	1793	164	1672	2	147	74	0	0	0.846	0.998	-0.152	1793	164	990	0	147	74	0	0	0.846	1	-0.154	1793	164	1561	0	147	74	0
ENSG00000168894	RNF181	chr2	+	85823641	85823772	85822878	85822972	85824226	85824301	318	102	366	0	147	74	0	0	0.611	1	-0.389	318	102	481	0	147	74	0	0	0.611	1	-0.389	318	102	330	0	147	74	0	0	0.611	1	-0.389	318	102	308	44	147	74	2.54471e-05
ENSG00000132300	PTCD3	chr2	+	86357770	86357860	86355071	86355114	86358200	86358229	81	8	264	0	147	74	1.18582e-05	0.000159288	0.836	1	-0.164	81	8	143	0	147	74	0.000231219	0.00247302	0.836	1	-0.164	81	8	78	0	147	74	0.00298967	0.0203786	0.836	1	-0.164	81	8	139	0	147	74	0.000263398
ENSG00000172071	EIF2AK3	chr2	-	88887499	88887622	88885358	88885579	88888278	88888419	91	7	357	0	147	74	2.58524e-05	0.000320446	0.867	1	-0.133	91	7	451	0	147	74	1.0535e-05	0.000164161	0.867	1	-0.133	91	7	244	0	147	74	0.000120401	0.00138931	0.867	1	-0.133	91	7	324	0	147	74	3.80593e-05
ENSG00000170485	NPAS2	chr2	+	101564696	101564817	101554214	101554304	101580519	101580638	88	20	90	0	147	74	1.10606e-06	1.84719e-05	0.689	1	-0.311	88	20	62	0	147	74	2.79949e-05	0.000391033	0.689	1	-0.311	88	20	33	0	147	74	0.00165919	0.0126656	0.689	1	-0.311	88	20	82	0	147	74	2.62735e-06
ENSG00000115594	IL1R1	chr2	+	102770404	102770477	102759245	102759480	102781233	102781468	28	28	12	0	146	74	0.000491485	0.00420129	0.336	1	-0.664	28	28	64	14	146	74	9.46971e-05	0.00114901	0.336	0.699	-0.363	28	28	50	16	146	74	0.00340128	0.022599	0.336	0.613	-0.277	28	28	47	0	146	74	3.42781e-10
ENSG00000115594	IL1R1	chr2	+	102781684	102781764	102781329	102781463	102785057	102785123	7	39	73	0	147	74	0	0	0.083	1	-0.917	7	39	27	0	147	74	5.37348e-14	2.34156e-12	0.083	1	-0.917	7	39	33	0	147	74	7.77156e-16	3.72777e-14	0.083	1	-0.917	7	39	57	0	147	74	0
ENSG00000115641	FHL2	chr2	-	106013103	106013154	106002817	106002997	106015426	106015518	26	58	78	27	124	74	2.07366e-09	5.12571e-08	0.211	0.633	-0.422	26	58	77	62	124	74	0.000373654	0.00370203	0.211	0.426	-0.215	26	58	71	41	124	74	6.51547e-06	0.000104686	0.211	0.508	-0.297	26	58	134	42	124	74	3.31701e-12
ENSG00000144152	FBLN7	chr2	+	112933290	112933416	112922577	112922748	112939315	112939453	159	23	274	13	147	74	0.0016885	0.0118612	0.777	0.914	-0.137	159	23	212	8	147	74	0.000756849	0.00674359	0.777	0.93	-0.153	159	23	254	10	147	74	0.00055003	0.00508151	0.777	0.927	-0.15	159	23	149	7	147	74	0.00751768
ENSG00000144136	SLC20A1	chr2	+	113418010	113418149	113416780	113417339	113418718	113418803	339	14	1038	0	147	74	1.26474e-07	2.46882e-06	0.924	1	-0.076	339	14	867	0	147	74	3.4858e-07	7.26999e-06	0.924	1	-0.076	339	14	620	0	147	74	2.61069e-06	4.53202e-05	0.924	1	-0.076	339	14	762	0	147	74	7.47826e-07
ENSG00000136717	BIN1	chr2	-	127815048	127815177	127808729	127808819	127816586	127816731	335	131	328	69	147	74	0.000181693	0.00179053	0.563	0.705	-0.142	335	131	502	80	147	74	9.33717e-09	2.46086e-07	0.563	0.76	-0.197	335	131	278	52	147	74	3.5425e-05	0.000473109	0.563	0.729	-0.166	335	131	232	53	147	74	0.00295845
ENSG00000115866	DARS	chr2	-	136678022	136678170	136673795	136673942	136680353	136680488	612	17	768	0	147	74	1.10698e-05	0.000149846	0.948	1	-0.052	612	17	744	0	147	74	1.32934e-05	0.000202069	0.948	1	-0.052	612	17	431	0	147	74	0.000268348	0.00276634	0.948	1	-0.052	612	17	843	0	147	74	6.4664e-06
ENSG00000153234	NR4A2	chr2	-	157187179	157187303	157185834	157186700	157188991	157189226	120	35	75	0	147	74	1.15011e-07	2.2598e-06	0.633	1	-0.367	120	35	721	86	147	74	0.000138564	0.00160016	0.633	0.808	-0.175	120	35	784	104	147	74	0.000591034	0.00540151	0.633	0.791	-0.158	120	35	619	42	147	74	2.1336e-08
ENSG00000163002	NUP35	chr2	+	183998293	183998351	183995145	183995273	184022171	184022241	26	5	91	0	131	74	0.00047743	0.00410027	0.746	1	-0.254	26	5	67	0	131	74	0.00139826	0.0112308	0.746	1	-0.254	26	5	40	0	131	74	0.00744459	0.0418142	0.746	1	-0.254	26	5	49	0	131	74	0.00396096
ENSG00000168542	COL3A1	chr2	+	189864010	189864074	189863399	189863444	189864195	189864303	8716	2043	3304	0	137	74	0	0	0.697	1	-0.303	8716	2043	8747	0	137	74	0	0	0.697	1	-0.303	8716	2043	16792	0	137	74	0	0	0.697	1	-0.303	8716	2043	2361	0	137	74	0
ENSG00000168542	COL3A1	chr2	+	189864010	189864109	189863399	189863444	189864195	189864303	16719	2043	6090	0	147	74	0	0	0.805	1	-0.195	16719	2043	16313	0	147	74	0	0	0.805	1	-0.195	16719	2043	34029	0	147	74	0	0	0.805	1	-0.195	16719	2043	4798	0	147	74	0
ENSG00000168542	COL3A1	chr2	+	189872225	189872333	189871070	189871178	189872610	189872664	9596	438	3360	0	147	74	0	0	0.917	1	-0.083	9596	438	9358	0	147	74	0	0	0.917	1	-0.083	9596	438	19666	0	147	74	0	0	0.917	1	-0.083	9596	438	2597	0	147	74	0
ENSG00000196141	SPATS2L	chr2	+	201253945	201254006	201248589	201248740	201277033	201277142	179	15	412	0	134	74	4.88311e-08	1.01183e-06	0.868	1	-0.132	179	15	282	0	134	74	1.04451e-06	1.983e-05	0.868	1	-0.132	179	15	386	0	134	74	8.37892e-08	1.91439e-06	0.868	1	-0.132	179	15	234	0	134	74	4.29852e-06
ENSG00000013441	CLK1	chr2	-	201719726	201719809	201718625	201718716	201721404	201721534	1191	62	508	0	147	74	9.62583e-10	2.47807e-08	0.906	1	-0.094	1191	62	3074	13	147	74	0	0	0.906	0.992	-0.086	1191	62	2014	34	147	74	9.66118e-08	2.18605e-06	0.906	0.968	-0.062	1191	62	1527	13	147	74	9.18576e-12
ENSG00000115414	FN1	chr2	-	216274671	216274837	216274285	216274462	216279559	216279681	8348	341	16453	0	147	74	0	0	0.925	1	-0.075	8348	341	8737	0	147	74	0	0	0.925	1	-0.075	8348	341	6791	0	147	74	0	0	0.925	1	-0.075	8348	341	6640	0	147	74	0
ENSG00000163466	ARPC2	chr2	+	219103386	219103573	219099074	219099120	219110142	219110269	676	73	661	0	147	74	0	0	0.823	1	-0.177	676	73	404	1	147	74	9.31477e-14	4.00469e-12	0.823	0.995	-0.172	676	73	528	0	147	74	0	0	0.823	1	-0.177	676	73	430	0	147	74	1.44329e-15
ENSG00000132323	ILKAP	chr2	-	239082174	239082294	239079583	239079665	239090705	239090827	171	12	257	0	147	74	1.87331e-05	0.000241009	0.878	1	-0.122	171	12	201	0	147	74	8.01723e-05	0.000990606	0.878	1	-0.122	171	12	136	0	147	74	0.000635937	0.00573941	0.878	1	-0.122	171	12	169	0	147	74	0.000209056
ENSG00000089006	SNX5	chr20	-	17923753	17923839	17922781	17923051	17928129	17928289	56	17	82	0	147	74	4.60804e-07	8.25973e-06	0.624	1	-0.376	56	17	162	0	147	74	3.33332e-10	1.04901e-08	0.624	1	-0.376	56	17	78	0	147	74	7.36347e-07	1.42112e-05	0.624	1	-0.376	56	17	81	0	147	74	5.1741e-07
ENSG00000089006	SNX5	chr20	-	17936008	17936119	17934639	17934761	17949017	17949154	152	16	195	0	147	74	1.91712e-06	3.05239e-05	0.827	1	-0.173	152	16	228	2	147	74	3.01984e-05	0.000418919	0.827	0.983	-0.156	152	16	155	0	147	74	1.14906e-05	0.00017368	0.827	1	-0.173	152	16	154	0	147	74	1.20573e-05
ENSG00000149531	FRG1B	chr20	+	29625872	29625984	29623128	29623254	29628226	29628331	38	26	113	9	147	74	9.28365e-08	1.84982e-06	0.424	0.863	-0.439	38	26	91	4	147	74	7.65533e-09	2.04296e-07	0.424	0.92	-0.496	38	26	37	5	147	74	0.00112985	0.00924741	0.424	0.788	-0.364	38	26	65	12	147	74	0.00092344
ENSG00000101444	AHCY	chr20	-	32873245	32873317	32868075	32868971	32878137	32878255	294	26	455	0	145	74	9.85223e-11	2.85412e-09	0.852	1	-0.148	294	26	238	0	145	74	2.45939e-07	5.25783e-06	0.852	1	-0.148	294	26	260	0	145	74	9.52698e-08	2.15965e-06	0.852	1	-0.148	294	26	246	0	145	74	1.73312e-07
ENSG00000101444	AHCY	chr20	-	32873245	32873440	32868075	32868971	32878137	32878255	571	26	824	0	147	74	1.2154e-09	3.08674e-08	0.917	1	-0.083	571	26	493	0	147	74	2.827e-07	5.98979e-06	0.917	1	-0.083	571	26	460	0	147	74	5.49945e-07	1.07786e-05	0.917	1	-0.083	571	26	538	0	147	74	1.18999e-07
ENSG00000131051	RBM39	chr20	-	34317383	34317473	34313045	34313077	34319862	34320057	0	13	90	3	147	74	3.59712e-14	1.39684e-12	0	0.938	-0.938	0	13	88	57	147	74	7.24168e-06	0.000116798	0	0.437	-0.437	0	13	46	44	147	74	0.000122748	0.00141342	0	0.345	-0.345	0	13	66	31	147	74	1.14651e-06
ENSG00000131051	RBM39	chr20	-	34322107	34322179	34319862	34320057	34326889	34326939	12	329	123	616	145	74	3.05715e-11	9.346e-10	0.018	0.092	-0.074	12	329	279	1025	145	74	0	0	0.018	0.122	-0.104	12	329	139	565	145	74	1.32117e-14	5.96512e-13	0.018	0.112	-0.094	12	329	158	701	145	74	1.34337e-13
ENSG00000118705	RPN2	chr20	+	35862422	35862498	35860698	35860794	35864982	35865112	955	79	3338	39	147	74	0	0	0.859	0.977	-0.118	955	79	1078	26	147	74	9.47843e-09	2.49654e-07	0.859	0.954	-0.095	955	79	973	24	147	74	3.8494e-08	9.34143e-07	0.859	0.953	-0.094	955	79	1060	11	147	74	2.9976e-15
ENSG00000124160	NCOA5	chr20	-	44708025	44708092	44698848	44699175	44718455	44718591	14	12	209	3	140	74	6.45374e-11	1.8977e-09	0.381	0.974	-0.593	14	12	93	6	140	74	4.63915e-06	7.81557e-05	0.381	0.891	-0.51	14	12	50	10	140	74	0.00606169	0.0356671	0.381	0.725	-0.344	14	12	86	8	140	74	4.07324e-05
ENSG00000130703	OSBPL2	chr20	+	60831112	60831277	60813579	60813653	60835036	60835181	69	7	134	0	147	74	0.000404925	0.003565	0.832	1	-0.168	69	7	110	0	147	74	0.000906229	0.00781074	0.832	1	-0.168	69	7	121	0	147	74	0.000616997	0.00560549	0.832	1	-0.168	69	7	150	0	147	74	0.000251665
ENSG00000130703	OSBPL2	chr20	+	60831120	60831277	60813579	60813653	60835036	60835181	36	7	85	0	147	74	0.000185688	0.00182601	0.721	1	-0.279	36	7	67	0	147	74	0.000546254	0.00509672	0.721	1	-0.279	36	7	73	0	147	74	0.000372989	0.00366762	0.721	1	-0.279	36	7	88	0	147	74	0.000157861
ENSG00000092758	COL9A3	chr20	+	61456976	61457222	61456319	61456373	61458118	61458172	558	875	1265	0	147	74	0	0	0.243	1	-0.757	558	875	1430	0	147	74	0	0	0.243	1	-0.757	558	875	24	0	147	74	1.34932e-10	4.45374e-09	0.243	1	-0.757	558	875	1724	0	147	74	0
ENSG00000092758	COL9A3	chr20	+	61457168	61457222	61456319	61456373	61458118	61458172	9824	875	8569	0	127	74	0	0	0.867	1	-0.133	9824	875	10556	0	127	74	0	0	0.867	1	-0.133	9824	875	6112	0	127	74	0	0	0.867	1	-0.133	9824	875	11713	0	127	74	0
ENSG00000092758	COL9A3	chr20	+	61457555	61457609	61456319	61456373	61458118	61458172	16280	875	14303	0	127	74	0	0	0.916	1	-0.084	16280	875	17208	0	127	74	0	0	0.916	1	-0.084	16280	875	10884	0	127	74	0	0	0.916	1	-0.084	16280	875	19773	0	127	74	0
ENSG00000142192	APP	chr21	-	27425551	27425664	27423315	27423509	27462258	27462388	1971	62	3081	0	147	74	0	0	0.941	1	-0.059	1971	62	2965	0	147	74	0	0	0.941	1	-0.059	1971	62	2777	0	147	74	0	0	0.941	1	-0.059	1971	62	2531	0	147	74	0
ENSG00000156261	CCT8	chr21	-	30437288	30437426	30435672	30435851	30439036	30439098	522	16	1104	0	147	74	7.31176e-07	1.2647e-05	0.943	1	-0.057	522	16	710	0	147	74	9.06313e-06	0.000142939	0.943	1	-0.057	522	16	671	0	147	74	1.25888e-05	0.000187854	0.943	1	-0.057	522	16	738	0	147	74	7.23466e-06
ENSG00000159128	IFNGR2	chr21	+	34799190	34799339	34793786	34793992	34805020	34805178	1495	61	707	0	147	74	4.65302e-10	1.24121e-08	0.925	1	-0.075	1495	61	795	0	147	74	6.58817e-11	2.24826e-09	0.925	1	-0.075	1495	61	489	0	147	74	9.35745e-08	2.12416e-06	0.925	1	-0.075	1495	61	719	0	147	74	3.54363e-10
ENSG00000159128	IFNGR2	chr21	+	34804483	34804643	34793786	34793992	34805020	34805178	1659	61	704	0	147	74	3.43188e-09	8.24656e-08	0.932	1	-0.068	1659	61	857	0	147	74	1.58443e-10	5.19507e-09	0.932	1	-0.068	1659	61	526	0	147	74	1.73501e-07	3.75055e-06	0.932	1	-0.068	1659	61	863	0	147	74	1.41145e-10
ENSG00000141959	PFKL	chr21	+	45744373	45744538	45743648	45743801	45744738	45745943	699	29	694	0	147	74	1.59742e-08	3.51323e-07	0.924	1	-0.076	699	29	1076	0	147	74	9.23617e-11	3.10341e-09	0.924	1	-0.076	699	29	547	0	147	74	2.00869e-07	4.2962e-06	0.924	1	-0.076	699	29	591	0	147	74	9.04407e-08
ENSG00000186866	POFUT2	chr21	-	46705592	46705843	46697981	46698084	46707655	46707813	208	9	149	0	147	74	0.00571184	0.0318388	0.921	1	-0.079	208	9	364	0	147	74	0.000192794	0.00211635	0.921	1	-0.079	208	9	232	0	147	74	0.00117038	0.00951106	0.921	1	-0.079	208	9	259	0	147	74	0.000762934
ENSG00000100345	MYH9	chr22	-	36737414	36737571	36723505	36723533	36744948	36745300	304	16	872	0	147	74	7.63166e-09	1.75428e-07	0.905	1	-0.095	304	16	736	0	147	74	2.80395e-08	6.87464e-07	0.905	1	-0.095	304	16	520	0	147	74	4.12653e-07	8.29587e-06	0.905	1	-0.095	304	16	788	0	147	74	1.655e-08
ENSG00000198792	TMEM184B	chr22	-	38627249	38627460	38626723	38626750	38641940	38642106	130	9	220	0	147	74	0.000130849	0.00134309	0.879	1	-0.121	130	9	150	0	147	74	0.000751001	0.00670023	0.879	1	-0.121	130	9	125	0	147	74	0.00161073	0.0123667	0.879	1	-0.121	130	9	125	0	147	74	0.00161073
ENSG00000100316	RPL3	chr22	-	39709638	39709734	39709195	39709315	39710111	39710213	0	34	44	15	147	74	3.08642e-14	1.20867e-12	0	0.596	-0.596	0	34	61	37	147	74	2.72404e-12	1.0624e-10	0	0.454	-0.454	0	34	101	41	147	74	5.55112e-16	2.68099e-14	0	0.554	-0.554	0	34	50	79	147	74	3.14582e-07
ENSG00000242247	ARFGAP3	chr22	-	43213147	43213270	43204772	43204896	43213734	43213863	489	30	516	0	147	74	1.54415e-09	3.87141e-08	0.891	1	-0.109	489	30	503	0	147	74	2.14237e-09	6.1052e-08	0.891	1	-0.109	489	30	346	0	147	74	1.78145e-07	3.84358e-06	0.891	1	-0.109	489	30	405	0	147	74	3.03122e-08
ENSG00000184164	CRELD2	chr22	+	50316881	50316965	50316259	50316355	50319064	50319205	91	21	507	0	147	74	1.11022e-16	5.06521e-15	0.686	1	-0.314	91	21	93	0	147	74	5.88514e-07	1.17964e-05	0.686	1	-0.314	91	21	78	0	147	74	3.15168e-06	5.40441e-05	0.686	1	-0.314	91	21	63	0	147	74	1.99007e-05
ENSG00000184164	CRELD2	chr22	+	50318007	50318103	50316259	50316355	50319064	50319205	111	21	465	0	147	74	8.54872e-15	3.46789e-13	0.727	1	-0.273	111	21	137	0	147	74	7.01029e-08	1.62328e-06	0.727	1	-0.273	111	21	146	0	147	74	3.4949e-08	8.50633e-07	0.727	1	-0.273	111	21	134	0	147	74	8.89407e-08
ENSG00000131368	MRPS25	chr3	-	15100875	15100982	15093223	15094140	15106567	15106767	44	7	137	0	147	74	4.74725e-05	0.000548224	0.76	1	-0.24	44	7	51	0	147	74	0.00342342	0.023154	0.76	1	-0.24	44	7	46	0	147	74	0.00498116	0.0305094	0.76	1	-0.24	44	7	42	0	147	74	0.00683073
ENSG00000144566	RAB5A	chr3	+	20017078	20017244	19992297	19992553	20017538	20017595	42	4	83	0	147	74	0.00859675	0.0438369	0.841	1	-0.159	42	4	160	0	147	74	0.00159134	0.0124768	0.841	1	-0.159	42	4	91	0	147	74	0.00682172	0.0391738	0.841	1	-0.159	42	4	138	0	147	74	0.00233335
ENSG00000144566	RAB5A	chr3	+	20017134	20017244	19992297	19992553	20017538	20017661	45	4	86	0	147	74	0.00935146	0.0467713	0.85	1	-0.15	45	4	169	0	147	74	0.00170038	0.0131747	0.85	1	-0.15	45	4	90	0	147	74	0.00836165	0.0457603	0.85	1	-0.15	45	4	139	0	147	74	0.00279194
ENSG00000160799	CCDC12	chr3	-	46966945	46967025	46963725	46963802	46982487	46982555	126	26	237	0	147	74	4.16289e-12	1.38863e-10	0.709	1	-0.291	126	26	192	0	147	74	9.79182e-11	3.28809e-09	0.709	1	-0.291	126	26	146	0	147	74	4.18902e-09	1.14915e-07	0.709	1	-0.291	126	26	197	0	147	74	6.74036e-11
ENSG00000090097	PCBP4	chr3	-	51995956	51996104	51995175	51995320	52001341	52001461	0	14	11	8	147	74	0.000205127	0.00198872	0	0.409	-0.409	0	14	8	7	147	74	0.000787401	0.00696805	0	0.365	-0.365	0	14	10	8	147	74	0.000355479	0.0035257	0	0.386	-0.386	0	14	11	5	147	74	4.30222e-05
ENSG00000168374	ARF4	chr3	-	57569624	57569734	57563042	57563114	57570110	57570191	574	32	1257	6	147	74	3.24214e-11	9.87e-10	0.9	0.991	-0.091	574	32	939	13	147	74	1.00793e-05	0.00015769	0.9	0.973	-0.073	574	32	800	9	147	74	3.51082e-06	5.97034e-05	0.9	0.978	-0.078	574	32	1133	9	147	74	1.05799e-08
ENSG00000168374	ARF4	chr3	-	57569624	57569759	57563042	57563114	57570110	57570191	85	32	285	6	147	74	7.27196e-14	2.75857e-12	0.572	0.96	-0.388	85	32	192	13	147	74	3.53409e-07	7.35945e-06	0.572	0.881	-0.309	85	32	179	9	147	74	3.066e-08	7.5107e-07	0.572	0.909	-0.337	85	32	242	9	147	74	1.10162e-10
ENSG00000136068	FLNB	chr3	+	58080562	58080681	58067355	58067503	58081867	58081945	133	10	395	0	147	74	2.18699e-06	3.44424e-05	0.87	1	-0.13	133	10	713	0	147	74	8.95254e-08	2.04014e-06	0.87	1	-0.13	133	10	328	0	147	74	6.26688e-06	0.000101121	0.87	1	-0.13	133	10	404	0	147	74	1.92516e-06
ENSG00000154175	ABI3BP	chr3	-	100621461	100621530	100604985	100605167	100645145	100645325	138	22	48	0	142	74	0.00111165	0.0084051	0.766	1	-0.234	138	22	249	0	142	74	3.22907e-10	1.01737e-08	0.766	1	-0.234	138	22	654	35	142	74	0.000319756	0.00321662	0.766	0.907	-0.141	138	22	50	0	142	74	0.00088412
ENSG00000114391	RPL24	chr3	-	101401272	101401336	101399935	101400059	101401614	101401747	48	202	128	148	137	74	2.4853e-11	7.69022e-10	0.114	0.318	-0.204	48	202	115	193	137	74	2.22234e-06	3.97712e-05	0.114	0.243	-0.129	48	202	104	43	137	74	0	0	0.114	0.566	-0.452	48	202	96	169	137	74	1.54281e-05
ENSG00000158092	NCK1	chr3	+	136646825	136647069	136581049	136581161	136664424	136665137	199	26	205	0	147	74	1.46668e-08	3.23827e-07	0.794	1	-0.206	199	26	281	0	147	74	2.48156e-10	7.94254e-09	0.794	1	-0.206	199	26	265	0	147	74	5.5053e-10	1.68809e-08	0.794	1	-0.206	199	26	278	0	147	74	2.87497e-10
ENSG00000163655	GMPS	chr3	+	155611306	155611488	155588324	155588686	155628480	155628674	111	12	161	0	147	74	1.90285e-05	0.00024444	0.823	1	-0.177	111	12	127	0	147	74	8.31337e-05	0.00102165	0.823	1	-0.177	111	12	126	0	147	74	8.71338e-05	0.00104437	0.823	1	-0.177	111	12	112	0	147	74	0.000172518
ENSG00000163655	GMPS	chr3	+	155621651	155621749	155588438	155588686	155628480	155628599	4	12	25	0	147	74	1.62398e-07	3.12805e-06	0.144	1	-0.856	4	12	17	0	147	74	3.51697e-06	6.06731e-05	0.144	1	-0.856	4	12	15	0	147	74	8.79641e-06	0.000137082	0.144	1	-0.856	4	12	23	0	147	74	3.2557e-07
ENSG00000178053	MLF1	chr3	+	158314650	158314734	158310222	158310370	158315868	158315997	290	13	178	0	147	74	0.00158212	0.0112705	0.918	1	-0.082	290	13	691	0	147	74	1.0256e-06	1.94982e-05	0.918	1	-0.082	290	13	781	0	147	74	5.06887e-07	9.98637e-06	0.918	1	-0.082	290	13	578	0	147	74	2.9319e-06
ENSG00000136603	SKIL	chr3	+	170077486	170079217	170075513	170075551	170099031	170099129	56	4	193	0	147	74	0.00237206	0.0156263	0.876	1	-0.124	56	4	154	0	147	74	0.00404775	0.0264843	0.876	1	-0.124	56	4	132	0	147	74	0.00584857	0.0347264	0.876	1	-0.124	56	4	188	0	147	74	0.00252246
ENSG00000136521	NDUFB5	chr3	+	179334770	179334832	179333770	179333837	179341707	179342286	127	9	176	0	135	74	0.00034968	0.00314293	0.886	1	-0.114	127	9	85	0	135	74	0.00638729	0.0380984	0.886	1	-0.114	127	9	93	0	135	74	0.00466197	0.0289434	0.886	1	-0.114	127	9	79	0	135	74	0.00817292
ENSG00000136521	NDUFB5	chr3	+	179336202	179336309	179333770	179333837	179341707	179341879	188	9	213	0	147	74	0.00100657	0.00774297	0.913	1	-0.087	188	9	135	0	147	74	0.00539784	0.0333477	0.913	1	-0.087	188	9	176	0	147	74	0.00210047	0.0153084	0.913	1	-0.087	188	9	137	0	147	74	0.00513584
ENSG00000114416	FXR1	chr3	+	180652925	180653019	180630458	180630524	180665652	180665724	231	56	266	22	147	74	2.70516e-05	0.000333523	0.675	0.859	-0.184	231	56	328	27	147	74	8.28778e-06	0.000132084	0.675	0.859	-0.184	231	56	205	23	147	74	0.00286173	0.0196837	0.675	0.818	-0.143	231	56	241	15	147	74	1.33301e-06
ENSG00000114796	KLHL24	chr3	+	183354008	183354099	183353410	183353581	183368083	183368363	17	15	13	0	147	74	0.00104109	0.00796737	0.363	1	-0.637	17	15	86	16	147	74	0.000613184	0.00563739	0.363	0.73	-0.367	17	15	51	6	147	74	0.000176486	0.00193529	0.363	0.811	-0.448	17	15	43	7	147	74	0.00139241
ENSG00000161204	ABCF3	chr3	+	183904583	183904663	183904294	183904442	183905451	183905771	70	7	241	0	147	74	3.41238e-05	0.00040902	0.834	1	-0.166	70	7	134	0	147	74	0.000430918	0.00417321	0.834	1	-0.166	70	7	92	0	147	74	0.00191534	0.0142282	0.834	1	-0.166	70	7	91	0	147	74	0.00199558
ENSG00000175166	PSMD2	chr3	+	184025144	184025313	184024538	184024622	184025401	184025496	224	14	552	0	147	74	1.18258e-07	2.31595e-06	0.89	1	-0.11	224	14	263	0	147	74	2.14935e-05	0.000310303	0.89	1	-0.11	224	14	230	0	147	74	5.00698e-05	0.000641702	0.89	1	-0.11	224	14	232	0	147	74	4.74654e-05
ENSG00000156976	EIF4A2	chr3	+	186506098	186506201	186505591	186505671	186506913	186507689	551	1234	502	473	147	74	0	0	0.184	0.348	-0.164	551	1234	1539	710	147	74	0	0	0.184	0.522	-0.338	551	1234	1377	672	147	74	0	0	0.184	0.508	-0.324	551	1234	859	563	147	74	0
ENSG00000168214	RBPJ	chr4	+	26322321	26322437	26321331	26321510	26387974	26388013	7	28	43	0	147	74	3.9968e-15	1.65838e-13	0.112	1	-0.888	7	28	99	0	147	74	0	0	0.112	1	-0.888	7	28	65	0	147	74	0	0	0.112	1	-0.888	7	28	65	0	147	74	0
ENSG00000083896	YTHDC1	chr4	-	69197820	69197915	69189856	69189941	69199025	69199115	21	15	13	0	147	74	0.00222498	0.0148159	0.413	1	-0.587	21	15	66	0	147	74	9.33849e-09	2.46086e-07	0.413	1	-0.587	21	15	22	0	147	74	0.000112584	0.00130986	0.413	1	-0.587	21	15	27	0	147	74	2.70747e-05
ENSG00000118816	CCNI	chr4	-	77977114	77977255	77976302	77976533	77977401	77977476	2126	97	1241	1	147	74	0	0	0.917	0.998	-0.081	2126	97	2374	0	147	74	0	0	0.917	1	-0.083	2126	97	2097	0	147	74	0	0	0.917	1	-0.083	2126	97	1806	0	147	74	0
ENSG00000269893	SNHG8	chr4	+	119200543	119200586	119200261	119200292	119200778	119200975	2289	342	773	0	116	74	0	0	0.81	1	-0.19	2289	342	2938	271	116	74	1.89051e-08	4.73721e-07	0.81	0.874	-0.064	2289	342	2735	259	116	74	1.50303e-07	3.29049e-06	0.81	0.871	-0.061	2289	342	2531	0	116	74	0
ENSG00000269893	SNHG8	chr4	+	119200547	119200586	119199863	119200292	119200778	119200978	815	342	383	0	112	74	0	0	0.612	1	-0.388	815	342	932	271	112	74	0.000100372	0.001209	0.612	0.694	-0.082	815	342	871	259	112	74	0.000313299	0.00315957	0.612	0.69	-0.078	815	342	1078	0	112	74	0
ENSG00000145390	USP53	chr4	+	120188474	120188637	120182869	120183019	120189422	120189575	26	6	66	0	147	74	0.000479165	0.00411325	0.686	1	-0.314	26	6	57	0	147	74	0.000871841	0.00756811	0.686	1	-0.314	26	6	56	0	147	74	0.00093579	0.00792531	0.686	1	-0.314	26	6	32	0	147	74	0.00706745
ENSG00000164111	ANXA5	chr4	-	122605748	122605920	122604518	122604632	122607442	122607527	20	359	13	3	147	74	3.51719e-13	1.26893e-11	0.027	0.686	-0.659	20	359	18	10	147	74	2.40918e-14	1.06773e-12	0.027	0.475	-0.448	20	359	32	18	147	74	0	0	0.027	0.472	-0.445	20	359	27	13	147	74	0
ENSG00000164111	ANXA5	chr4	-	122605831	122605920	122604518	122604632	122607442	122607527	3563	359	6205	3	147	74	0	0	0.833	0.999	-0.166	3563	359	3948	10	147	74	0	0	0.833	0.995	-0.162	3563	359	3679	18	147	74	0	0	0.833	0.99	-0.157	3563	359	4050	13	147	74	0
ENSG00000164111	ANXA5	chr4	-	122605831	122605926	122604518	122604632	122607442	122607527	6755	359	11987	3	147	74	0	0	0.905	1	-0.095	6755	359	7519	10	147	74	0	0	0.905	0.997	-0.092	6755	359	6982	18	147	74	0	0	0.905	0.995	-0.09	6755	359	7777	13	147	74	0
ENSG00000109390	NDUFC1	chr4	-	140213683	140213763	140196442	140196546	140216196	140216300	223	19	268	0	147	74	4.0162e-07	7.26803e-06	0.855	1	-0.145	223	19	344	0	147	74	3.70535e-08	8.93622e-07	0.855	1	-0.145	223	19	295	0	147	74	1.64312e-07	3.5686e-06	0.855	1	-0.145	223	19	292	0	147	74	1.8097e-07
ENSG00000153147	SMARCA5	chr4	+	144469080	144469293	144468537	144468656	144471149	144471257	463	37	987	0	147	74	0	0	0.863	1	-0.137	463	37	942	0	147	74	1.11022e-16	5.639e-15	0.863	1	-0.137	463	37	545	0	147	74	1.72895e-12	6.78537e-11	0.863	1	-0.137	463	37	796	0	147	74	1.66533e-15
ENSG00000164305	CASP3	chr4	-	185569618	185569785	185559554	185559622	185570548	185570629	5	23	48	24	147	74	9.30784e-06	0.000128526	0.099	0.502	-0.403	5	23	19	13	147	74	0.0010291	0.00866056	0.099	0.424	-0.325	5	23	16	6	147	74	9.97314e-05	0.00117702	0.099	0.573	-0.474	5	23	25	13	147	74	9.64279e-05
ENSG00000145495	2016-03-06	chr5	+	10417381	10417516	10415599	10415781	10430004	10430140	327	13	297	0	147	74	0.000285217	0.00263561	0.927	1	-0.073	327	13	431	0	147	74	4.091e-05	0.000549097	0.927	1	-0.073	327	13	267	0	147	74	0.000478306	0.00452419	0.927	1	-0.073	327	13	307	0	147	74	0.000241911
ENSG00000145623	OSMR	chr5	+	38869133	38869219	38846100	38846489	38876302	38876475	1308	38	1098	0	147	74	4.65673e-09	1.10437e-07	0.945	1	-0.055	1308	38	1084	0	147	74	5.42561e-09	1.47753e-07	0.945	1	-0.055	1308	38	575	0	147	74	4.15613e-06	6.96899e-05	0.945	1	-0.055	1308	38	928	0	147	74	3.27735e-08
ENSG00000153071	DAB2	chr5	-	39382719	39383373	39376751	39377384	39388900	39388954	26	18	25	0	147	74	3.52685e-05	0.000421648	0.421	1	-0.579	26	18	67	0	147	74	2.46571e-09	6.97927e-08	0.421	1	-0.579	26	18	23	0	147	74	6.53112e-05	0.000810241	0.421	1	-0.579	26	18	37	0	147	74	1.29974e-06
ENSG00000153071	DAB2	chr5	-	39388406	39388469	39376751	39377384	39388900	39388954	91	18	86	0	136	74	7.13931e-06	0.000101474	0.733	1	-0.267	91	18	84	0	136	74	8.65629e-06	0.00013731	0.733	1	-0.267	91	18	46	0	136	74	0.000575704	0.00528595	0.733	1	-0.267	91	18	92	0	136	74	4.06063e-06
ENSG00000083720	OXCT1	chr5	-	41762212	41762302	41749628	41749709	41794104	41794180	24	7	122	0	147	74	4.75099e-06	7.03795e-05	0.633	1	-0.367	24	7	43	0	147	74	0.000831453	0.00728235	0.633	1	-0.367	24	7	50	0	147	74	0.000426674	0.0041141	0.633	1	-0.367	24	7	34	0	147	74	0.00218571
ENSG00000164258	NDUFS4	chr5	+	52942062	52942235	52899281	52899360	52978947	52979168	320	18	272	0	147	74	1.79182e-05	0.000231815	0.899	1	-0.101	320	18	211	0	147	74	9.89291e-05	0.00119399	0.899	1	-0.101	320	18	179	0	147	74	0.000268538	0.00276772	0.899	1	-0.101	320	18	156	0	147	74	0.000579763
ENSG00000062194	GPBP1	chr5	+	56517202	56517223	56509947	56510020	56526672	56526796	4	176	87	301	94	74	4.72555e-12	1.56809e-10	0.018	0.185	-0.167	4	176	76	371	94	74	1.34635e-08	3.46428e-07	0.018	0.139	-0.121	4	176	33	211	94	74	1.28989e-05	0.000192016	0.018	0.11	-0.092	4	176	61	242	94	74	6.3011e-10
ENSG00000062194	GPBP1	chr5	+	56532939	56532999	56531792	56531859	56542126	56542311	16	243	99	245	133	74	1.80744e-13	6.66749e-12	0.035	0.184	-0.149	16	243	85	307	133	74	1.94359e-08	4.86128e-07	0.035	0.133	-0.098	16	243	35	174	133	74	0.000278219	0.00285613	0.035	0.101	-0.066	16	243	93	195	133	74	1.66533e-15
ENSG00000069020	MAST4	chr5	+	66398334	66398439	66396262	66396420	66400193	66400403	138	26	62	0	147	74	6.45236e-05	0.000719491	0.728	1	-0.272	138	26	319	0	147	74	1.48437e-13	6.28279e-12	0.728	1	-0.272	138	26	175	0	147	74	1.18383e-09	3.49287e-08	0.728	1	-0.272	138	26	354	0	147	74	2.65343e-14
ENSG00000069020	MAST4	chr5	+	66398363	66398439	66396262	66396420	66400193	66400403	312	26	129	0	147	74	9.08752e-05	0.000971997	0.858	1	-0.142	312	26	601	0	147	74	5.13134e-12	1.94973e-10	0.858	1	-0.142	312	26	329	0	147	74	1.32506e-08	3.40174e-07	0.858	1	-0.142	312	26	665	0	147	74	1.21347e-12
ENSG00000151292	CSNK1G3	chr5	+	122940417	122940524	122927012	122927108	122950035	122952465	123	6	222	0	147	74	0.00201771	0.0137074	0.912	1	-0.088	123	6	288	0	147	74	0.000928448	0.00795952	0.912	1	-0.088	123	6	177	0	147	74	0.00393421	0.0253877	0.912	1	-0.088	123	6	244	0	147	74	0.00152185
ENSG00000125347	IRF1	chr5	-	131822486	131822532	131822308	131822378	131822645	131822822	318	28	53	0	119	74	0.00840608	0.0430719	0.876	1	-0.124	318	28	300	0	119	74	1.85415e-08	4.65678e-07	0.876	1	-0.124	318	28	135	0	119	74	4.2738e-05	0.000557367	0.876	1	-0.124	318	28	99	0	119	74	0.000366
ENSG00000155329	ZCCHC10	chr5	-	132358532	132358598	132342450	132342612	132362188	132362241	0	20	25	72	139	74	0.00255223	0.0165814	0	0.156	-0.156	0	20	18	39	139	74	0.000962845	0.00819649	0	0.197	-0.197	0	20	11	24	139	74	0.00179281	0.0134848	0	0.196	-0.196	0	20	39	44	139	74	9.44941e-06
ENSG00000170606	HSPA4	chr5	+	132424746	132424853	132424095	132424247	132425253	132425387	198	8	819	0	147	74	3.16682e-05	0.000383288	0.926	1	-0.074	198	8	337	0	147	74	0.000549057	0.0051185	0.926	1	-0.074	198	8	271	0	147	74	0.00118763	0.00962428	0.926	1	-0.074	198	8	401	0	147	74	0.000295869
ENSG00000120708	TGFBI	chr5	+	135382023	135382245	135379746	135379811	135382539	135382704	631	20	525	0	147	74	1.90629e-05	0.000244757	0.941	1	-0.059	631	20	488	0	147	74	3.08367e-05	0.000426508	0.941	1	-0.059	631	20	838	0	147	74	6.98937e-07	1.35051e-05	0.941	1	-0.059	631	20	466	0	147	74	4.15085e-05
ENSG00000113712	CSNK1A1	chr5	-	148885045	148885158	148871759	148876423	148886589	148886696	259	8	327	0	147	74	0.00223758	0.0148831	0.942	1	-0.058	259	8	568	0	147	74	0.000428622	0.00415318	0.942	1	-0.058	259	8	355	0	147	74	0.00174026	0.0131676	0.942	1	-0.058	259	8	406	0	147	74	0.00115406
ENSG00000145901	TNIP1	chr5	-	150444520	150444692	150443173	150443308	150466645	150466719	946	76	266	7	147	74	0.0014636	0.0105668	0.862	0.95	-0.088	946	76	1110	47	147	74	0.000679697	0.00615254	0.862	0.922	-0.06	946	76	438	8	147	74	2.69785e-06	4.67507e-05	0.862	0.965	-0.103	946	76	688	7	147	74	2.18123e-11
ENSG00000113734	BNIP1	chr5	+	172585746	172585848	172581324	172581416	172590727	172591343	67	13	79	0	147	74	3.95801e-05	0.000466289	0.722	1	-0.278	67	13	115	1	147	74	2.99098e-05	0.000415232	0.722	0.983	-0.261	67	13	130	2	147	74	6.49992e-05	0.000806574	0.722	0.97	-0.248	67	13	106	1	147	74	5.53144e-05
ENSG00000113734	BNIP1	chr5	+	172586935	172587054	172581324	172581416	172590727	172591060	43	13	57	0	147	74	2.59587e-05	0.000321528	0.625	1	-0.375	43	13	84	1	147	74	1.6319e-05	0.000242656	0.625	0.977	-0.352	43	13	70	2	147	74	0.00033616	0.00335982	0.625	0.946	-0.321	43	13	63	1	147	74	0.000138672
ENSG00000169228	RAB24	chr5	-	176729577	176729645	176729128	176729497	176730009	176730706	136	21	160	0	141	74	1.07522e-07	2.12412e-06	0.773	1	-0.227	136	21	164	6	141	74	0.00109027	0.00909408	0.773	0.935	-0.162	136	21	141	0	141	74	3.90476e-07	7.88547e-06	0.773	1	-0.227	136	21	118	0	141	74	2.12991e-06
ENSG00000112699	GMDS	chr6	-	1930336	1930464	1742701	1742820	1960100	1960205	488	72	637	1	147	74	0	0	0.773	0.997	-0.224	488	72	438	12	147	74	7.57699e-10	2.29839e-08	0.773	0.948	-0.175	488	72	229	7	147	74	3.0121e-06	5.1777e-05	0.773	0.943	-0.17	488	72	435	5	147	74	3.20854e-14
ENSG00000198721	ECI2	chr6	-	4125483	4125604	4119419	4119509	4126368	4126471	143	27	347	0	147	74	2.17604e-14	8.62783e-13	0.727	1	-0.273	143	27	144	0	147	74	1.18753e-08	3.07591e-07	0.727	1	-0.273	143	27	107	0	147	74	3.83938e-07	7.7598e-06	0.727	1	-0.273	143	27	176	0	147	74	8.43498e-10
ENSG00000214113	LYRM4	chr6	-	5216850	5216971	5108652	5109725	5260880	5261172	461	18	317	0	147	74	0.000110409	0.00115732	0.928	1	-0.072	461	18	246	0	147	74	0.000462498	0.00442567	0.928	1	-0.072	461	18	231	0	147	74	0.000642087	0.00578536	0.928	1	-0.072	461	18	216	0	147	74	0.000900367
ENSG00000153162	BMP6	chr6	+	7880244	7880334	7879306	7879383	7880426	7881655	1616	75	476	6	147	74	0.000299178	0.00274814	0.916	0.976	-0.06	1616	75	1097	0	147	74	8.88178e-16	4.34937e-14	0.916	1	-0.084	1616	75	565	4	147	74	1.54541e-06	2.81689e-05	0.916	0.986	-0.07	1616	75	1262	0	147	74	0
ENSG00000204580	DDR1	chr6	+	30852314	30852487	30850861	30850942	30856464	30856591	23	16	40	0	147	74	1.01396e-06	1.70908e-05	0.42	1	-0.58	23	16	34	0	147	74	4.17293e-06	7.10023e-05	0.42	1	-0.58	23	16	12	0	147	74	0.0033312	0.0222264	0.42	1	-0.58	23	16	12	0	147	74	0.0033312
ENSG00000137411	VARS2	chr6	+	30880886	30880934	30879790	30880235	30881085	30881164	62	8	259	0	121	74	3.43135e-06	5.20743e-05	0.826	1	-0.174	62	8	163	0	121	74	3.53734e-05	0.000482856	0.826	1	-0.174	62	8	122	0	121	74	0.000145248	0.00163053	0.826	1	-0.174	62	8	96	0	121	74	0.000439592
ENSG00000204256	BRD2	chr6	+	32942797	32942889	32942238	32942542	32943160	32943298	100	324	357	659	147	74	1.33547e-05	0.000177328	0.134	0.214	-0.08	100	324	599	975	147	74	1.43558e-08	3.67827e-07	0.134	0.236	-0.102	100	324	344	768	147	74	0.00413394	0.0263875	0.134	0.184	-0.05	100	324	560	637	147	74	0
ENSG00000204248	COL11A2	chr6	-	33141787	33141832	33141477	33141522	33141941	33141995	12109	1987	18494	0	118	74	0	0	0.793	1	-0.207	12109	1987	22211	0	118	74	0	0	0.793	1	-0.207	12109	1987	14370	0	118	74	0	0	0.793	1	-0.207	12109	1987	20085	0	118	74	0
ENSG00000204248	COL11A2	chr6	-	33143635	33143846	33143350	33143458	33144035	33144245	14491	1752	20981	925	147	74	0	0	0.806	0.919	-0.113	14491	1752	21589	1063	147	74	0	0	0.806	0.911	-0.105	14491	1752	11178	644	147	74	0	0	0.806	0.897	-0.091	14491	1752	18763	510	147	74	0
ENSG00000204248	COL11A2	chr6	-	33144209	33144263	33144035	33144080	33144497	33144542	13023	1454	20202	0	127	74	0	0	0.839	1	-0.161	13023	1454	24427	57	127	74	0	0	0.839	0.996	-0.157	13023	1454	15798	0	127	74	0	0	0.839	1	-0.161	13023	1454	22988	0	127	74	0
ENSG00000231500	RPS18	chr6	+	33243573	33243660	33240411	33240503	33243741	33243843	749	307	532	73	147	74	2.22045e-16	1.00225e-14	0.551	0.786	-0.235	749	307	725	138	147	74	8.60245e-12	3.20179e-10	0.551	0.726	-0.175	749	307	1000	0	147	74	0	0	0.551	1	-0.449	749	307	598	148	147	74	7.56392e-06
ENSG00000231925	TAPBP	chr6	-	33271731	33271766	33269461	33269548	33271904	33271994	143	35	240	13	108	74	2.88284e-06	4.43454e-05	0.737	0.927	-0.19	143	35	149	4	108	74	3.54441e-07	7.37812e-06	0.737	0.962	-0.225	143	35	53	0	108	74	2.19948e-05	0.000310158	0.737	1	-0.263	143	35	141	0	108	74	1.5134e-10
ENSG00000112715	VEGFA	chr6	+	43746196	43746273	43745205	43745402	43746625	43746655	5838	341	1374	0	147	74	0	0	0.896	1	-0.104	5838	341	16154	0	147	74	0	0	0.896	1	-0.104	5838	341	12717	0	147	74	0	0	0.896	1	-0.104	5838	341	9854	0	147	74	0
ENSG00000112759	SLC29A1	chr6	+	44193797	44193904	44191301	44191378	44194999	44195079	36	124	88	61	147	74	4.0092e-11	1.20679e-09	0.128	0.421	-0.293	36	124	96	122	147	74	1.16484e-05	0.000179362	0.128	0.284	-0.156	36	124	69	114	147	74	0.00224563	0.0161692	0.128	0.234	-0.106	36	124	75	111	147	74	0.000375921
ENSG00000112759	SLC29A1	chr6	+	44198304	44198402	44197643	44197783	44198547	44198626	368	15	252	0	147	74	0.00041899	0.00366851	0.925	1	-0.075	368	15	461	0	147	74	1.32984e-05	0.000202088	0.925	1	-0.075	368	15	338	0	147	74	8.54083e-05	0.00102669	0.925	1	-0.075	368	15	369	0	147	74	5.1322e-05
ENSG00000112280	COL9A1	chr6	-	70963087	70963132	70961964	70962018	70964665	70964719	25297	2857	19823	0	118	74	0	0	0.847	1	-0.153	25297	2857	31367	0	118	74	0	0	0.847	1	-0.153	25297	2857	20189	0	118	74	0	0	0.847	1	-0.153	25297	2857	35956	0	118	74	0
ENSG00000112280	COL9A1	chr6	-	70981767	70981791	70981357	70981411	70983749	70983785	14454	657	17652	0	97	74	0	0	0.944	1	-0.056	14454	657	23890	0	97	74	0	0	0.944	1	-0.056	14454	657	18663	0	97	74	0	0	0.944	1	-0.056	14454	657	21010	0	97	74	0
ENSG00000112695	COX7A2	chr6	-	75950016	75950101	75947390	75947704	75950891	75950981	1802	242	1609	125	147	74	1.37321e-06	2.2563e-05	0.789	0.866	-0.077	1802	242	1314	113	147	74	0.000149999	0.00171628	0.789	0.854	-0.065	1802	242	1351	120	147	74	0.00035213	0.00349954	0.789	0.85	-0.061	1802	242	1098	74	147	74	1.8739e-07
ENSG00000112695	COX7A2	chr6	-	75950016	75950101	75947390	75947704	75953432	75953504	979	132	992	0	147	74	0	0	0.789	1	-0.211	979	132	786	0	147	74	0	0	0.789	1	-0.211	979	132	809	3	147	74	0	0	0.789	0.993	-0.204	979	132	679	1	147	74	0
ENSG00000112695	COX7A2	chr6	-	75950891	75950981	75947538	75947704	75953432	75953589	1232	132	567	0	147	74	0	0	0.825	1	-0.175	1232	132	445	0	147	74	0	0	0.825	1	-0.175	1232	132	470	3	147	74	8.65974e-15	3.94612e-13	0.825	0.987	-0.162	1232	132	356	1	147	74	1.98952e-13
ENSG00000009413	REV3L	chr6	-	111686146	111686245	111685055	111685181	111686467	111686547	0	34	19	59	147	74	0.00026588	0.00248535	0	0.139	-0.139	0	34	33	44	147	74	1.77884e-07	3.87422e-06	0	0.274	-0.274	0	34	21	37	147	74	6.07174e-06	9.82943e-05	0	0.222	-0.222	0	34	21	70	147	74	0.000345785
ENSG00000111817	DSE	chr6	+	116752116	116752356	116747736	116747990	116754505	116754713	134	18	158	0	147	74	8.78044e-07	1.49535e-05	0.789	1	-0.211	134	18	188	0	147	74	1.73939e-07	3.79434e-06	0.789	1	-0.211	134	18	111	0	147	74	1.67448e-05	0.000242661	0.789	1	-0.211	134	18	108	0	147	74	2.06395e-05
ENSG00000111832	RWDD1	chr6	+	116912050	116912113	116911434	116911567	116914142	116914432	57	11	129	0	136	74	2.6652e-06	4.12344e-05	0.738	1	-0.262	57	11	59	0	136	74	0.000354938	0.00354619	0.738	1	-0.262	57	11	79	0	136	74	6.66259e-05	0.000824887	0.738	1	-0.262	57	11	68	0	136	74	0.000161227
ENSG00000111897	SERINC1	chr6	-	122768265	122768410	122767918	122768149	122772808	122772899	1285	34	1432	0	147	74	2.4469e-09	6.00742e-08	0.95	1	-0.05	1285	34	2494	0	147	74	6.87406e-12	2.58136e-10	0.95	1	-0.05	1285	34	1453	0	147	74	2.09098e-09	5.99099e-08	0.95	1	-0.05	1285	34	1782	0	147	74	2.28879e-10
ENSG00000079931	MOXD1	chr6	-	132649151	132649254	132645069	132645122	132649553	132649733	453	52	654	0	147	74	0	0	0.814	1	-0.186	453	52	196	0	147	74	1.0549e-08	2.75724e-07	0.814	1	-0.186	453	52	114	0	147	74	7.3949e-06	0.00011736	0.814	1	-0.186	453	52	321	0	147	74	2.37099e-12
ENSG00000130340	SNX9	chr6	+	158294133	158294208	158288578	158288665	158317858	158318030	182	29	310	0	147	74	1.09845e-12	3.81683e-11	0.76	1	-0.24	182	29	316	3	147	74	7.18898e-10	2.18677e-08	0.76	0.981	-0.221	182	29	218	1	147	74	3.74216e-09	1.03639e-07	0.76	0.991	-0.231	182	29	295	0	147	74	2.47491e-12
ENSG00000197081	IGF2R	chr6	+	160523550	160523703	160517470	160517657	160524777	160524847	311	16	685	0	147	74	6.26339e-08	1.28268e-06	0.907	1	-0.093	311	16	457	0	147	74	1.3589e-06	2.53493e-05	0.907	1	-0.093	311	16	290	0	147	74	3.25611e-05	0.000439754	0.907	1	-0.093	311	16	203	0	147	74	0.000279842
ENSG00000112592	TBP	chr6	+	170880497	170880592	170878699	170878828	170881273	170881941	9	5	70	0	147	74	4.26643e-05	0.000498125	0.475	1	-0.525	9	5	41	0	147	74	0.000367726	0.00365679	0.475	1	-0.525	9	5	21	0	147	74	0.00393478	0.0253877	0.475	1	-0.525	9	5	29	0	147	74	0.00132134
ENSG00000156928	MALSU1	chr7	+	23340457	23340636	23338957	23339227	23347486	23347609	256	12	458	0	147	74	1.17638e-05	0.000158188	0.915	1	-0.085	256	12	190	0	147	74	0.00106502	0.00890932	0.915	1	-0.085	256	12	161	0	147	74	0.00216035	0.0156444	0.915	1	-0.085	256	12	284	0	147	74	0.000155261
ENSG00000122566	HNRNPA2B1	chr7	-	26232870	26232993	26232114	26232197	26233194	26233314	2300	142	6353	119	147	74	0	0	0.891	0.964	-0.073	2300	142	2684	0	147	74	0	0	0.891	1	-0.109	2300	142	2358	0	147	74	0	0	0.891	1	-0.109	2300	142	2644	0	147	74	0
ENSG00000122566	HNRNPA2B1	chr7	-	26237450	26237486	26237241	26237352	26240191	26240366	214	972	1636	2797	109	74	0	0	0.13	0.284	-0.154	214	972	449	1127	109	74	1.38096e-10	4.56705e-09	0.13	0.213	-0.083	214	972	319	909	109	74	2.58611e-06	4.49246e-05	0.13	0.192	-0.062	214	972	518	1310	109	74	7.24802e-11
ENSG00000106052	TAX1BP1	chr7	+	27839583	27839709	27835737	27835838	27855967	27856013	499	27	636	0	147	74	1.45331e-09	3.65447e-08	0.903	1	-0.097	499	27	458	0	147	74	6.18699e-08	1.44165e-06	0.903	1	-0.097	499	27	345	0	147	74	1.09068e-06	2.03707e-05	0.903	1	-0.097	499	27	626	0	147	74	1.75797e-09
ENSG00000049540	ELN	chr7	+	73480273	73480327	73475430	73475469	73481061	73481106	331	106	135	0	127	74	5.9952e-15	2.45552e-13	0.645	1	-0.355	331	106	377	0	127	74	0	0	0.645	1	-0.355	331	106	619	0	127	74	0	0	0.645	1	-0.355	331	106	233	0	127	74	0
ENSG00000106683	LIMK1	chr7	+	73513361	73513568	73500077	73500174	73520204	73520310	75	7	119	0	147	74	0.00093	0.00723934	0.844	1	-0.156	75	7	116	0	147	74	0.00102796	0.00865237	0.844	1	-0.156	75	7	80	0	147	74	0.00406506	0.0260322	0.844	1	-0.156	75	7	82	0	147	74	0.00372935
ENSG00000106665	CLIP2	chr7	+	73790216	73791152	73778584	73778645	73795135	73795193	165	10	247	0	147	74	0.000112615	0.00117753	0.893	1	-0.107	165	10	185	0	147	74	0.000451206	0.00433432	0.893	1	-0.107	165	10	141	0	147	74	0.00148712	0.0115693	0.893	1	-0.107	165	10	129	0	147	74	0.00213993
ENSG00000127947	PTPN12	chr7	+	77221501	77221573	77214859	77214898	77227158	77227218	356	45	250	0	145	74	8.74032e-11	2.54214e-09	0.801	1	-0.199	356	45	370	1	145	74	6.45595e-13	2.61888e-11	0.801	0.995	-0.194	356	45	220	0	145	74	7.11935e-10	2.14952e-08	0.801	1	-0.199	356	45	203	0	145	74	2.46456e-09
ENSG00000241685	ARPC1A	chr7	+	98935803	98935908	98923520	98923627	98941915	98942138	69	29	337	0	147	74	0	0	0.545	1	-0.455	69	29	100	0	147	74	6.02869e-11	2.06637e-09	0.545	1	-0.455	69	29	50	0	147	74	6.25541e-07	1.21778e-05	0.545	1	-0.455	69	29	71	0	147	74	8.77495e-09
ENSG00000166526	ZNF3	chr7	-	99674925	99675056	99672939	99673253	99677158	99677279	22	8	118	5	147	74	0.000592969	0.00493688	0.581	0.922	-0.341	22	8	60	2	147	74	0.00147258	0.0117156	0.581	0.938	-0.357	22	8	20	0	147	74	0.00661186	0.0382068	0.581	1	-0.419	22	8	47	0	147	74	0.000158457
ENSG00000005483	MLL5	chr7	+	104704474	104704563	104703797	104704027	104707173	104707254	0	65	23	112	147	74	5.15393e-05	0.000589434	0	0.094	-0.094	0	65	29	153	147	74	6.41038e-05	0.000816072	0	0.087	-0.087	0	65	9	71	147	74	0.00394525	0.0254366	0	0.06	-0.06	0	65	19	90	147	74	6.19915e-05
ENSG00000135250	SRPK2	chr7	-	104766228	104766321	104757834	104758469	104766694	104766787	6	51	54	131	147	74	0.00259878	0.0168022	0.056	0.172	-0.116	6	51	31	64	147	74	0.00147366	0.0117191	0.056	0.196	-0.14	6	51	36	53	147	74	5.2494e-05	0.000668765	0.056	0.255	-0.199	6	51	63	76	147	74	9.852e-07
ENSG00000128567	PODXL	chr7	-	131193709	131193787	131191337	131191485	131194123	131194344	63	6	67	0	147	74	0.00839321	0.0430406	0.841	1	-0.159	63	6	131	0	147	74	0.000884367	0.00764887	0.841	1	-0.159	63	6	85	0	147	74	0.00396041	0.0255048	0.841	1	-0.159	63	6	68	0	147	74	0.00802385
ENSG00000133612	AGAP3	chr7	+	150814457	150814543	150814181	150814269	150815296	150815420	190	13	189	0	147	74	0.000108052	0.00113449	0.88	1	-0.12	190	13	284	0	147	74	8.72032e-06	0.00013815	0.88	1	-0.12	190	13	254	0	147	74	1.79451e-05	0.000258079	0.88	1	-0.12	190	13	164	0	147	74	0.000239212
ENSG00000147408	CSGALNACT1	chr8	-	19297340	19297442	19277850	19278029	19315936	19316153	593	39	895	0	147	74	7.21645e-15	2.93916e-13	0.884	1	-0.116	593	39	950	15	147	74	8.66261e-07	1.67074e-05	0.884	0.97	-0.086	593	39	412	5	147	74	2.31622e-05	0.000324852	0.884	0.976	-0.092	593	39	957	8	147	74	6.53086e-10
ENSG00000077782	FGFR1	chr8	-	38285438	38285611	38279314	38279459	38314873	38315052	11	14	20	4	147	74	0.00463779	0.0269751	0.283	0.716	-0.433	11	14	28	4	147	74	0.000533277	0.00499014	0.283	0.779	-0.496	11	14	36	5	147	74	0.000201468	0.00216249	0.283	0.784	-0.501	11	14	36	7	147	74	0.00089091
ENSG00000158669	AGPAT6	chr8	+	41469421	41469511	41467173	41467474	41469698	41469792	140	13	392	0	147	74	6.71856e-08	1.37038e-06	0.844	1	-0.156	140	13	219	0	147	74	5.12285e-06	8.53564e-05	0.844	1	-0.156	140	13	130	0	147	74	0.000146824	0.00164447	0.844	1	-0.156	140	13	168	0	147	74	3.04884e-05
ENSG00000168172	HOOK3	chr8	+	42821615	42821756	42819453	42819617	42828431	42828542	33	5	115	0	147	74	0.000459896	0.00397264	0.769	1	-0.231	33	5	62	0	147	74	0.00371078	0.0247209	0.769	1	-0.231	33	5	55	0	147	74	0.00540668	0.0325406	0.769	1	-0.231	33	5	69	0	147	74	0.00262685
ENSG00000181195	PENK	chr8	-	57358374	57358546	57353830	57354496	57358984	57359040	850	70	623	0	147	74	2.22045e-16	1.00225e-14	0.859	1	-0.141	850	70	452	19	147	74	0.00785143	0.0446162	0.859	0.923	-0.064	850	70	521	23	147	74	0.00874029	0.0473676	0.859	0.919	-0.06	850	70	501	15	147	74	0.000145278
ENSG00000137573	SULF1	chr8	+	70533269	70533486	70513888	70514064	70536176	70536432	122	27	480	0	147	74	0	0	0.695	1	-0.305	122	27	99	0	147	74	1.81453e-07	3.94722e-06	0.695	1	-0.305	122	27	76	0	147	74	2.92183e-06	5.03484e-05	0.695	1	-0.305	122	27	54	0	147	74	5.86531e-05
ENSG00000067167	TRAM1	chr8	-	71510129	71510246	71499340	71499411	71512253	71512317	0	47	86	0	147	74	0	0	0	1	-1	0	47	52	0	147	74	0	0	0	1	-1	0	47	54	11	147	74	0	0	0	0.712	-0.712	0	47	88	0	147	74	0
ENSG00000154582	TCEB1	chr8	-	74871999	74872053	74868145	74868289	74884311	74884482	4	14	63	5	127	74	5.16875e-09	1.21616e-07	0.143	0.88	-0.737	4	14	41	13	127	74	7.16366e-05	0.000898973	0.143	0.648	-0.505	4	14	33	16	127	74	0.00112146	0.00918941	0.143	0.546	-0.403	4	14	55	6	127	74	5.68574e-08
ENSG00000104324	CPQ	chr8	+	98078236	98078438	98041630	98041722	98155247	98155729	213	8	161	0	147	74	0.00866014	0.0440629	0.931	1	-0.069	213	8	167	0	147	74	0.00777659	0.0443132	0.931	1	-0.069	213	8	299	0	147	74	0.0011941	0.00966715	0.931	1	-0.069	213	8	163	0	147	74	0.00835267
ENSG00000156482	RPL30	chr8	-	99057216	99057316	99054872	99055003	99057574	99057627	15838	5142	6944	1238	147	74	0	0	0.608	0.738	-0.13	15838	5142	10497	1498	147	74	0	0	0.608	0.779	-0.171	15838	5142	13706	2275	147	74	0	0	0.608	0.752	-0.144	15838	5142	9545	1859	147	74	0
ENSG00000164932	CTHRC1	chr8	+	104387965	104388187	104384660	104384887	104394685	104395225	26	25	134	0	147	74	0	0	0.344	1	-0.656	26	25	52	0	147	74	2.58188e-10	8.23923e-09	0.344	1	-0.656	26	25	48	0	147	74	8.00819e-10	2.40902e-08	0.344	1	-0.656	26	25	39	0	147	74	1.25979e-08
ENSG00000147684	NDUFB9	chr8	+	125559240	125559354	125555180	125555520	125562001	125562219	657	51	1222	0	147	74	0	0	0.866	1	-0.134	657	51	645	0	147	74	6.99441e-15	3.2392e-13	0.866	1	-0.134	657	51	563	0	147	74	1.25455e-13	5.2997e-12	0.866	1	-0.134	657	51	479	0	147	74	3.05833e-12
ENSG00000249859	PVT1	chr8	+	128867400	128867565	128806778	128806980	128902834	128903041	2	94	9	17	147	74	7.48915e-06	0.000105914	0.011	0.21	-0.199	2	94	25	160	147	74	0.000712294	0.00639775	0.011	0.073	-0.062	2	94	29	126	147	74	1.90478e-05	0.000272189	0.011	0.104	-0.093	2	94	25	84	147	74	2.37057e-06
ENSG00000179950	PUF60	chr8	-	144899500	144899636	144899211	144899315	144899761	144899952	430	13	998	0	147	74	5.84992e-06	8.48305e-05	0.943	1	-0.057	430	13	536	0	147	74	0.000101495	0.00122199	0.943	1	-0.057	430	13	431	0	147	74	0.000280249	0.00287277	0.943	1	-0.057	430	13	469	0	147	74	0.00018982
ENSG00000107249	GLIS3	chr9	-	4286037	4286523	4125733	4125941	4299420	4299916	14	25	106	16	147	74	1.90911e-09	4.73508e-08	0.22	0.769	-0.549	14	25	75	21	147	74	4.82582e-06	8.09755e-05	0.22	0.643	-0.423	14	25	145	26	147	74	2.76937e-09	7.83737e-08	0.22	0.737	-0.517	14	25	118	48	147	74	6.19914e-05
ENSG00000086062	B4GALT1	chr9	-	33113771	33113876	33110634	33113584	33120416	33120604	217	24	172	0	147	74	8.49157e-07	1.44907e-05	0.82	1	-0.18	217	24	236	4	147	74	5.54717e-05	0.000720117	0.82	0.967	-0.147	217	24	212	0	147	74	9.82128e-08	2.21921e-06	0.82	1	-0.18	217	24	82	0	147	74	0.000322704
ENSG00000086062	B4GALT1	chr9	-	33115988	33116111	33113365	33113584	33120416	33120604	157	24	159	0	147	74	6.8484e-08	1.3924e-06	0.767	1	-0.233	157	24	174	4	147	74	5.4799e-05	0.000712739	0.767	0.956	-0.189	157	24	141	0	147	74	2.53456e-07	5.31922e-06	0.767	1	-0.233	157	24	72	0	147	74	9.85004e-05
ENSG00000135048	TMEM2	chr9	-	74309424	74309523	74305007	74305162	74312900	74313120	235	41	331	0	147	74	1.55431e-15	6.69499e-14	0.743	1	-0.257	235	41	159	0	147	74	1.27455e-09	3.74351e-08	0.743	1	-0.257	235	41	109	0	147	74	2.25326e-07	4.76544e-06	0.743	1	-0.257	235	41	232	0	147	74	2.05591e-12
ENSG00000107372	ZFAND5	chr9	-	74978385	74978522	74975543	74975703	74979611	74980113	131	185	419	102	147	74	0	0	0.263	0.674	-0.411	131	185	667	422	147	74	5.00243e-10	1.548e-08	0.263	0.443	-0.18	131	185	403	332	147	74	7.06572e-05	0.000867596	0.263	0.379	-0.116	131	185	660	401	147	74	7.62769e-11
ENSG00000135018	UBQLN1	chr9	-	86281264	86284242	86279944	86280060	86292641	86292876	499	21	941	0	147	74	5.56126e-09	1.3055e-07	0.923	1	-0.077	499	21	736	0	147	74	5.143e-08	1.21144e-06	0.923	1	-0.077	499	21	544	0	147	74	7.1475e-07	1.37998e-05	0.923	1	-0.077	499	21	650	0	147	74	1.548e-07
ENSG00000135018	UBQLN1	chr9	-	86284099	86284238	86279944	86280060	86292641	86292876	39	21	90	0	147	74	1.91642e-10	5.38014e-09	0.483	1	-0.517	39	21	91	0	147	74	1.65139e-10	5.4025e-09	0.483	1	-0.517	39	21	93	0	147	74	1.23033e-10	4.08015e-09	0.483	1	-0.517	39	21	89	0	147	74	2.2265e-10
ENSG00000135018	UBQLN1	chr9	-	86284099	86284242	86279944	86280060	86292641	86292876	238	21	459	0	147	74	5.32447e-10	1.40777e-08	0.851	1	-0.149	238	21	382	0	147	74	4.28645e-09	1.18062e-07	0.851	1	-0.149	238	21	321	0	147	74	2.8203e-08	6.95033e-07	0.851	1	-0.149	238	21	340	0	147	74	1.52966e-08
ENSG00000048828	FAM120A	chr9	+	96233422	96233669	96214172	96214671	96238537	96238620	157	15	652	0	147	74	1.75569e-10	4.94528e-09	0.84	1	-0.16	157	15	257	0	147	74	6.21427e-07	1.23699e-05	0.84	1	-0.16	157	15	225	0	147	74	1.80346e-06	3.24874e-05	0.84	1	-0.16	157	15	262	0	147	74	5.30766e-07
ENSG00000106799	TGFBR1	chr9	+	101904817	101904985	101900140	101900371	101907013	101907170	109	6	319	0	147	74	0.00040474	0.00356398	0.901	1	-0.099	109	6	211	0	147	74	0.00147031	0.0117027	0.901	1	-0.099	109	6	164	0	147	74	0.00320178	0.0215469	0.901	1	-0.099	109	6	187	0	147	74	0.00214119
ENSG00000066697	MSANTD3	chr9	+	103204187	103204638	103189558	103189675	103212838	103212963	437	100	445	0	147	74	0	0	0.687	1	-0.313	437	100	537	0	147	74	0	0	0.687	1	-0.313	437	100	441	3	147	74	0	0	0.687	0.987	-0.3	437	100	393	0	147	74	0
ENSG00000136868	SLC31A1	chr9	+	116019392	116019465	115983807	115983958	116020973	116021142	47	19	85	0	146	74	1.4163e-08	3.14206e-07	0.556	1	-0.444	47	19	136	0	146	74	4.51938e-11	1.57174e-09	0.556	1	-0.444	47	19	91	0	146	74	6.47433e-09	1.73261e-07	0.556	1	-0.444	47	19	113	0	146	74	4.79036e-10
ENSG00000196739	COL27A1	chr9	+	117008145	117008190	117005786	117005840	117012894	117012948	329	31	829	7	118	74	3.01554e-11	9.22989e-10	0.869	0.987	-0.118	329	31	680	0	118	74	2.23155e-14	9.94651e-13	0.869	1	-0.131	329	31	413	2	118	74	2.64588e-09	7.5225e-08	0.869	0.992	-0.123	329	31	503	4	118	74	3.91281e-09
ENSG00000196739	COL27A1	chr9	+	117008145	117008310	117005786	117005840	117012894	117012948	223	31	686	7	147	74	7.43627e-13	2.61788e-11	0.784	0.98	-0.196	223	31	450	0	147	74	8.77076e-15	4.02093e-13	0.784	1	-0.216	223	31	332	2	147	74	2.13951e-10	6.90452e-09	0.784	0.988	-0.204	223	31	373	4	147	74	1.19148e-09
ENSG00000196739	COL27A1	chr9	+	117068799	117068968	117066887	117066953	117071539	117071758	408	60	1314	51	147	74	3.99877e-11	1.20437e-09	0.774	0.928	-0.154	408	60	734	40	147	74	2.62641e-06	4.64093e-05	0.774	0.902	-0.128	408	60	522	30	147	74	3.47282e-05	0.000465192	0.774	0.898	-0.124	408	60	663	38	147	74	1.06479e-05
ENSG00000136859	ANGPTL2	chr9	-	129870193	129871059	129856011	129856205	129884593	129885162	505	33	724	0	147	74	1.98708e-12	6.79775e-11	0.885	1	-0.115	505	33	729	0	147	74	1.78202e-12	7.04562e-11	0.885	1	-0.115	505	33	988	0	147	74	1.22125e-14	5.53429e-13	0.885	1	-0.115	505	33	375	0	147	74	2.17757e-08
ENSG00000167110	GOLGA2	chr9	-	131028565	131028604	131028248	131028299	131029472	131029553	232	9	395	0	112	74	0.000483572	0.00414549	0.945	1	-0.055	232	9	330	0	112	74	0.000872282	0.00757073	0.945	1	-0.055	232	9	208	0	112	74	0.0039198	0.0253341	0.945	1	-0.055	232	9	316	0	112	74	0.00100686
ENSG00000130707	ASS1	chr9	+	133364719	133364851	133355771	133355836	133370253	133370410	119	92	118	44	147	74	0.0010343	0.00792749	0.394	0.574	-0.18	119	92	86	0	147	74	0	0	0.394	1	-0.606	119	92	57	0	147	74	4.65739e-13	1.90531e-11	0.394	1	-0.606	119	92	65	0	147	74	1.70974e-14
ENSG00000148248	SURF4	chr9	-	136232860	136233006	136230063	136230635	136233474	136233551	60	9	76	0	147	74	0.000487866	0.00417455	0.77	1	-0.23	60	9	79	0	147	74	0.000404025	0.00396267	0.77	1	-0.23	60	9	85	0	147	74	0.000280835	0.00287818	0.77	1	-0.23	60	9	94	0	147	74	0.000167816
ENSG00000160293	VAV2	chr9	-	136660789	136660858	136656904	136656991	136661550	136661646	101	11	254	0	142	74	1.3448e-06	2.21535e-05	0.827	1	-0.173	101	11	116	0	142	74	0.000169304	0.00190052	0.827	1	-0.173	101	11	65	0	142	74	0.0028105	0.0193883	0.827	1	-0.173	101	11	165	0	142	74	2.17673e-05
ENSG00000123595	RAB9A	chrX	+	13721932	13722021	13707243	13707407	13726839	13728625	36	61	99	16	147	74	6.39488e-14	2.42767e-12	0.229	0.757	-0.528	36	61	107	53	147	74	3.39582e-06	5.86942e-05	0.229	0.504	-0.275	36	61	80	58	147	74	0.0016703	0.0127327	0.229	0.41	-0.181	36	61	81	30	147	74	1.80704e-07
ENSG00000177189	RPS6KA3	chrX	-	20204413	20204484	20194551	20194616	20206614	20206652	6	4	27	0	144	74	0.00210881	0.0141711	0.435	1	-0.565	6	4	39	0	144	74	0.00066842	0.00606454	0.435	1	-0.565	6	4	17	0	144	74	0.00790436	0.0437085	0.435	1	-0.565	6	4	18	0	144	74	0.00677146
ENSG00000130066	SAT1	chrX	+	23801916	23802000	23801774	23801826	23803444	23803546	2383	143	1668	0	147	74	0	0	0.893	1	-0.107	2383	143	2913	0	147	74	0	0	0.893	1	-0.107	2383	143	2997	0	147	74	0	0	0.893	1	-0.107	2383	143	3075	7	147	74	0
ENSG00000101955	SRPX	chrX	-	38013714	38013832	38008594	38009147	38016148	38016282	203	31	237	14	147	74	0.00357068	0.0218082	0.767	0.895	-0.128	203	31	272	16	147	74	0.00241105	0.0174991	0.767	0.895	-0.128	203	31	404	14	147	74	3.53127e-06	6.00303e-05	0.767	0.936	-0.169	203	31	209	13	147	74	0.00713564
ENSG00000101955	SRPX	chrX	-	38013714	38013836	38008588	38009147	38016148	38016282	413	31	504	14	147	74	0.00174313	0.0121585	0.87	0.948	-0.078	413	31	551	16	147	74	0.00197299	0.0148523	0.87	0.945	-0.075	413	31	821	14	147	74	2.28782e-06	4.02417e-05	0.87	0.967	-0.097	413	31	427	13	147	74	0.00555942
ENSG00000101955	SRPX	chrX	-	38031133	38031310	38024021	38024148	38033412	38033604	409	11	475	0	147	74	0.000612452	0.00507004	0.949	1	-0.051	409	11	585	0	147	74	0.000281102	0.0029168	0.949	1	-0.051	409	11	781	0	147	74	9.93413e-05	0.00117326	0.949	1	-0.051	409	11	432	0	147	74	0.000872038
ENSG00000102226	USP11	chrX	+	47102794	47103001	47102024	47102119	47103896	47103924	497	14	866	0	147	74	1.34131e-05	0.000177874	0.947	1	-0.053	497	14	619	0	147	74	6.72487e-05	0.000850752	0.947	1	-0.053	497	14	348	0	147	74	0.000965704	0.0081336	0.947	1	-0.053	497	14	509	0	147	74	0.00017216
ENSG00000102265	TIMP1	chrX	+	47444341	47444414	47442806	47442935	47445919	47446188	41	32	74	0	146	74	1.251e-12	4.32914e-11	0.394	1	-0.606	41	32	218	0	146	74	0	0	0.394	1	-0.606	41	32	49	0	146	74	1.12565e-09	3.33319e-08	0.394	1	-0.606	41	32	221	0	146	74	0
ENSG00000102100	SLC35A2	chrX	-	48767090	48767273	48763668	48763820	48768822	48768933	117	12	231	0	147	74	2.42528e-06	3.77984e-05	0.831	1	-0.169	117	12	137	0	147	74	7.25752e-05	0.000909706	0.831	1	-0.169	117	12	116	0	147	74	0.00019013	0.00206054	0.831	1	-0.169	117	12	159	0	147	74	2.90882e-05
ENSG00000086758	HUWE1	chrX	-	53571989	53572122	53570846	53570929	53573396	53573553	92	13	258	0	147	74	4.71138e-08	9.79036e-07	0.781	1	-0.219	92	13	147	0	147	74	4.08582e-06	6.96938e-05	0.781	1	-0.219	92	13	83	0	147	74	0.00018368	0.00200257	0.781	1	-0.219	92	13	118	0	147	74	1.94963e-05
ENSG00000147140	NONO	chrX	+	70517685	70517788	70517226	70517311	70518318	70518358	323	20	756	0	147	74	3.87694e-10	1.04404e-08	0.89	1	-0.11	323	20	600	0	147	74	4.11865e-09	1.13807e-07	0.89	1	-0.11	323	20	398	0	147	74	2.2051e-07	4.67564e-06	0.89	1	-0.11	323	20	514	0	147	74	1.92692e-08
ENSG00000147162	OGT	chrX	+	70767756	70767873	70764416	70764485	70774362	70774442	179	7	507	0	147	74	0.00028482	0.00263398	0.928	1	-0.072	179	7	437	0	147	74	0.000436089	0.00421431	0.928	1	-0.072	179	7	230	0	147	74	0.00311054	0.0210654	0.928	1	-0.072	179	7	381	0	147	74	0.000657828
ENSG00000232119	MCTS1	chrX	+	119742079	119742318	119739933	119740031	119746037	119746242	84	13	151	0	147	74	1.70638e-06	2.74869e-05	0.765	1	-0.235	84	13	77	0	147	74	0.00017314	0.00193801	0.765	1	-0.235	84	13	76	0	147	74	0.000187132	0.00203489	0.765	1	-0.235	84	13	78	0	147	74	0.000160281
ENSG00000147403	RPL10	chrX	+	153627678	153627737	153626837	153626883	153627827	153627935	44	19	147	0	132	74	7.88836e-12	2.55593e-10	0.565	1	-0.435	44	19	137	0	132	74	2.01452e-11	7.28443e-10	0.565	1	-0.435	44	19	44	0	132	74	5.97722e-06	9.69235e-05	0.565	1	-0.435	44	19	79	0	132	74	1.73378e-08
ENSG00000071859	FAM50A	chrX	+	153678028	153678083	153677568	153677645	153678230	153678279	232	11	449	0	128	74	2.50081e-05	0.000310738	0.924	1	-0.076	232	11	298	0	128	74	0.000178895	0.001991	0.924	1	-0.076	232	11	295	0	128	74	0.000187575	0.00203818	0.924	1	-0.076	232	11	240	0	128	74	0.000481671
ENSG00000165775	FUNDC2	chrX	+	154279944	154280076	154274783	154274859	154282869	154282888	29	23	66	0	147	74	1.1483e-10	3.29837e-09	0.388	1	-0.612	29	23	44	10	147	74	0.00446066	0.0286874	0.388	0.689	-0.301	29	23	35	8	147	74	0.00796401	0.0439774	0.388	0.688	-0.3	29	23	54	8	147	74	0.000191214
ENSG00000179403	VWA1	chr1	+	1372306	1372864	1371050	1371201	1374460	1378262	110	0	408	26	147	74	0.0013083	0.00961564	1	0.888	0.112	110	0	243	14	147	74	0.00348205	0.023464	1	0.897	0.103	110	0	210	12	147	74	0.00415504	0.0264947	1	0.898	0.102	110	0	125	8	147	74	0.00424993
ENSG00000179403	VWA1	chr1	+	1372701	1372864	1370902	1371201	1374460	1376145	92	0	340	26	147	74	0.00126494	0.00935149	1	0.868	0.132	92	0	202	14	147	74	0.00330316	0.0225016	1	0.879	0.121	92	0	165	12	147	74	0.0031253	0.0211421	1	0.874	0.126	92	0	107	8	147	74	0.00450654
ENSG00000078369	GNB1	chr1	-	1735857	1736020	1724683	1724750	1747194	1747301	635	0	870	77	147	74	0	0	1	0.85	0.15	635	0	579	49	147	74	1.77636e-15	8.56053e-14	1	0.856	0.144	635	0	658	61	147	74	0	0	1	0.844	0.156	635	0	491	56	147	74	0
ENSG00000162441	LZIC	chr1	-	9996576	9996685	9995549	9995685	10002681	10002826	85	0	349	29	147	74	0.00115552	0.00868001	1	0.858	0.142	85	0	113	12	147	74	0.000817955	0.0071899	1	0.826	0.174	85	0	113	8	147	74	0.00712943	0.0404543	1	0.877	0.123	85	0	155	13	147	74	0.00218517
ENSG00000120948	TARDBP	chr1	+	11076900	11077064	11073772	11074022	11078789	11078930	379	0	1426	54	147	74	5.19867e-06	7.63199e-05	1	0.93	0.07	379	0	621	31	147	74	7.0134e-07	1.3782e-05	1	0.91	0.09	379	0	483	17	147	74	9.4769e-05	0.00112629	1	0.935	0.065	379	0	739	36	147	74	6.11373e-07
ENSG00000083444	PLOD1	chr1	+	12020702	12020786	12018572	12018704	12023588	12023693	564	0	683	40	147	74	1.66994e-10	4.70897e-09	1	0.896	0.104	564	0	1242	65	147	74	1.2723e-10	4.2179e-09	1	0.906	0.094	564	0	1198	63	147	74	1.31163e-10	4.33809e-09	1	0.905	0.095	564	0	677	44	147	74	1.37461e-11
ENSG00000083444	PLOD1	chr1	+	12020702	12020824	12018572	12018704	12023588	12023693	1059	0	1147	40	147	74	1.956e-10	5.48521e-09	1	0.935	0.065	1059	0	2174	65	147	74	2.77352e-10	8.83013e-09	1	0.944	0.056	1059	0	2005	63	147	74	1.11284e-10	3.7206e-09	1	0.941	0.059	1059	0	1164	44	147	74	1.99899e-11
ENSG00000065526	SPEN	chr1	+	16265212	16265371	16264306	16264501	16265790	16266955	148	0	194	11	147	74	0.00142166	0.0103137	1	0.899	0.101	148	0	187	10	147	74	0.0021378	0.0158573	1	0.904	0.096	148	0	122	6	147	74	0.00638252	0.0371507	1	0.911	0.089	148	0	127	12	147	74	7.54601e-05
ENSG00000125944	HNRNPR	chr1	-	23644975	23645181	23640045	23640195	23648020	23648156	602	0	1515	65	147	74	1.84915e-09	4.59532e-08	1	0.921	0.079	602	0	977	39	147	74	3.66819e-08	8.8505e-07	1	0.927	0.073	602	0	761	36	147	74	3.99946e-09	1.10083e-07	1	0.914	0.086	602	0	979	57	147	74	8.28437e-12
ENSG00000125944	HNRNPR	chr1	-	23644975	23645190	23640045	23640195	23648020	23648156	353	0	805	65	147	74	1.24866e-10	3.56649e-09	1	0.862	0.138	353	0	517	39	147	74	3.04583e-09	8.55041e-08	1	0.87	0.13	353	0	441	36	147	74	1.33935e-09	3.91652e-08	1	0.86	0.14	353	0	549	57	147	74	1.60383e-12
ENSG00000133226	SRRM1	chr1	+	24973569	24973699	24973157	24973280	24975349	24975520	48	35	27	120	147	74	1.33976e-09	3.38567e-08	0.408	0.102	0.306	48	35	53	112	147	74	0.000115383	0.00136158	0.408	0.192	0.216	48	35	58	117	147	74	0.000189531	0.00205589	0.408	0.2	0.208	48	35	44	118	147	74	3.46394e-06
ENSG00000084623	EIF3I	chr1	+	32691749	32691884	32690010	32690076	32692003	32692073	46	0	4	106	147	74	0	0	1	0.019	0.981	46	0	2	98	147	74	0	0	1	0.01	0.99	46	0	0	95	147	74	0	0	1	0	1	46	0	3	110	147	74	0
ENSG00000084623	EIF3I	chr1	+	32691749	32691921	32690010	32690076	32692003	32692073	784	0	899	106	147	74	0	0	1	0.81	0.19	784	0	713	98	147	74	0	0	1	0.786	0.214	784	0	737	95	147	74	0	0	1	0.796	0.204	784	0	647	110	147	74	0
ENSG00000084623	EIF3I	chr1	+	32691771	32691884	32690010	32690076	32692003	32692073	775	0	945	106	147	74	0	0	1	0.818	0.182	775	0	697	98	147	74	0	0	1	0.782	0.218	775	0	740	95	147	74	0	0	1	0.797	0.203	775	0	633	110	147	74	0
ENSG00000084623	EIF3I	chr1	+	32691771	32691921	32690010	32690076	32692003	32692131	1513	0	1840	106	147	74	0	0	1	0.897	0.103	1513	0	1408	98	147	74	0	0	1	0.879	0.121	1513	0	1477	95	147	74	0	0	1	0.887	0.113	1513	0	1277	110	147	74	0
ENSG00000004455	AK2	chr1	-	33497144	33497262	33490042	33490168	33502336	33502503	119	192	46	144	147	74	0.00105735	0.00807258	0.238	0.139	0.099	119	192	59	387	147	74	1.9984e-15	9.60517e-14	0.238	0.071	0.167	119	192	62	253	147	74	2.67443e-07	5.57473e-06	0.238	0.11	0.128	119	192	89	272	147	74	0.000147892
ENSG00000116560	SFPQ	chr1	-	35642919	35643000	35641978	35642075	35643589	35643637	600	0	648	36	147	74	3.10813e-10	8.50057e-09	1	0.901	0.099	600	0	1669	74	147	74	7.02172e-10	2.13827e-08	1	0.919	0.081	600	0	1095	52	147	74	7.13413e-10	2.15266e-08	1	0.914	0.086	600	0	1146	67	147	74	3.45457e-12
ENSG00000183520	UTP11L	chr1	+	38484924	38485055	38484730	38484824	38488370	38488481	344	0	682	18	147	74	0.00102529	0.00787151	1	0.95	0.05	344	0	341	24	147	74	9.25963e-08	2.10573e-06	1	0.877	0.123	344	0	324	21	147	74	4.16136e-07	8.34884e-06	1	0.886	0.114	344	0	305	16	147	74	8.83642e-06
ENSG00000117385	LEPRE1	chr1	-	43227993	43228017	43224927	43225061	43232177	43232673	41	0	117	21	97	74	0.00146593	0.010582	1	0.81	0.19	41	0	68	14	97	74	0.00116324	0.00960152	1	0.787	0.213	41	0	90	15	97	74	0.00270765	0.0188186	1	0.821	0.179	41	0	65	12	97	74	0.00222947
ENSG00000117385	LEPRE1	chr1	-	43227993	43228144	43224927	43225061	43232177	43232694	313	0	593	21	147	74	0.000182319	0.001796	1	0.934	0.066	313	0	388	14	147	74	0.000344392	0.00346046	1	0.933	0.067	313	0	445	15	147	74	0.000462351	0.00439608	1	0.937	0.063	313	0	292	12	147	74	0.000217629
ENSG00000164008	C1orf50	chr1	+	43239216	43239320	43232976	43233295	43240407	43240539	41	0	35	12	147	74	0.000140057	0.00142494	1	0.595	0.405	41	0	35	7	147	74	0.00364655	0.0243703	1	0.716	0.284	41	0	32	9	147	74	0.000665222	0.00595999	1	0.642	0.358	41	0	39	8	147	74	0.0027173
ENSG00000164008	C1orf50	chr1	+	43239233	43239320	43233179	43233295	43240407	43240539	64	0	61	12	147	74	0.000169531	0.00168307	1	0.719	0.281	64	0	48	7	147	74	0.00194155	0.0146504	1	0.775	0.225	64	0	43	9	147	74	0.000254613	0.00264692	1	0.706	0.294	64	0	60	8	147	74	0.00212697
ENSG00000117450	PRDX1	chr1	-	45980178	45980269	45976718	45977086	45980544	45980667	443	0	1050	155	147	74	0	0	1	0.773	0.227	443	0	374	89	147	74	0	0	1	0.679	0.321	443	0	284	62	147	74	0	0	1	0.698	0.302	443	0	553	113	147	74	0
ENSG00000132780	NASP	chr1	+	46067926	46068037	46056894	46056942	46072153	46072263	83	0	178	52	147	74	8.89442e-09	2.02897e-07	1	0.633	0.367	83	0	109	32	147	74	4.018e-08	9.62646e-07	1	0.632	0.368	83	0	94	23	147	74	7.90197e-07	1.51613e-05	1	0.673	0.327	83	0	83	21	147	74	8.05534e-07
ENSG00000132780	NASP	chr1	+	46070607	46070688	46056894	46056942	46072153	46072263	224	0	565	52	147	74	3.64423e-08	7.69858e-07	1	0.845	0.155	224	0	275	32	147	74	7.79853e-09	2.07812e-07	1	0.812	0.188	224	0	206	23	147	74	5.8952e-08	1.38868e-06	1	0.818	0.182	224	0	228	21	147	74	6.49577e-07
ENSG00000085998	POMGNT1	chr1	-	46659235	46659311	46658976	46659060	46659526	46659597	151	0	352	28	147	74	3.58306e-05	0.000427463	1	0.864	0.136	151	0	81	9	147	74	6.56879e-05	0.00083402	1	0.819	0.181	151	0	77	8	147	74	0.000139974	0.00157567	1	0.829	0.171	151	0	78	7	147	74	0.000421841
ENSG00000116641	DOCK7	chr1	-	62939652	62939759	62923208	62923376	62940878	62941022	80	0	198	23	147	74	0.000293584	0.00270261	1	0.813	0.187	80	0	153	18	147	74	0.000369326	0.0036678	1	0.811	0.189	80	0	100	14	147	74	0.000207362	0.00221991	1	0.782	0.218	80	0	144	23	147	74	3.51586e-05
ENSG00000137955	RABGGTB	chr1	+	76252384	76252482	76251912	76251959	76253181	76253289	62	19	8	48	147	74	1.58651e-13	5.87378e-12	0.622	0.077	0.545	62	19	19	258	147	74	0	0	0.622	0.036	0.586	62	19	20	24	147	74	0.000611306	0.00556302	0.622	0.296	0.326	62	19	30	243	147	74	0
ENSG00000117054	ACADM	chr1	+	76252384	76252550	76251717	76251959	76253181	76253260	70	19	12	48	147	74	6.61249e-13	2.33433e-11	0.65	0.112	0.538	70	19	19	258	147	74	0	0	0.65	0.036	0.614	70	19	15	24	147	74	1.56709e-05	0.000228512	0.65	0.239	0.411	70	19	19	243	147	74	0
ENSG00000117054	ACADM	chr1	+	76252384	76252601	76251717	76251959	76253181	76253260	53	19	7	48	147	74	2.01139e-12	6.87169e-11	0.584	0.068	0.516	53	19	5	258	147	74	0	0	0.584	0.01	0.574	53	19	14	24	147	74	0.000212051	0.00226474	0.584	0.227	0.357	53	19	19	243	147	74	0
ENSG00000160679	CHTOP	chr1	+	153615702	153615840	153614721	153614905	153617539	153618782	263	2	424	18	147	74	0.0054534	0.0306569	0.985	0.922	0.063	263	2	191	23	147	74	3.41255e-07	7.12266e-06	0.985	0.807	0.178	263	2	149	16	147	74	6.88363e-06	0.000110134	0.985	0.824	0.161	263	2	201	11	147	74	0.00282791
ENSG00000158710	TAGLN2	chr1	-	159889063	159889161	159887896	159888731	159889450	159889625	522	0	415	45	147	74	9.99201e-16	4.35183e-14	1	0.823	0.177	522	0	434	38	147	74	5.02598e-13	2.05253e-11	1	0.852	0.148	522	0	340	27	147	74	5.52653e-11	1.91133e-09	1	0.864	0.136	522	0	339	23	147	74	1.9279e-09
ENSG00000158710	TAGLN2	chr1	-	159889063	159889166	159887896	159888731	159889450	159889625	907	0	785	45	147	74	2.65343e-14	1.04312e-12	1	0.898	0.102	907	0	790	38	147	74	5.67102e-12	2.14732e-10	1	0.913	0.087	907	0	610	27	147	74	4.60173e-10	1.42076e-08	1	0.919	0.081	907	0	595	23	147	74	1.21016e-08
ENSG00000122218	COPA	chr1	-	160268891	160269054	160268634	160268781	160275222	160275361	689	0	1146	45	147	74	4.75687e-09	1.1255e-07	1	0.928	0.072	689	0	1202	46	147	74	6.65369e-09	1.79584e-07	1	0.929	0.071	689	0	668	31	147	74	2.23453e-09	6.39734e-08	1	0.916	0.084	689	0	1079	44	147	74	2.78832e-09
ENSG00000117143	UAP1	chr1	+	162560112	162560305	162558482	162558623	162567581	162567648	307	0	407	11	147	74	0.00290092	0.0184324	1	0.949	0.051	307	0	347	16	147	74	5.17825e-05	0.000678028	1	0.916	0.084	307	0	336	14	147	74	0.000149047	0.00166634	1	0.924	0.076	307	0	495	22	147	74	3.18983e-05
ENSG00000117143	UAP1	chr1	+	162562521	162562572	162560112	162560301	162567581	162567648	654	22	583	58	124	74	8.73192e-06	0.000121232	0.947	0.857	0.09	654	22	609	63	124	74	2.68407e-06	4.73516e-05	0.947	0.852	0.095	654	22	524	64	124	74	5.81033e-08	1.37015e-06	0.947	0.83	0.117	654	22	790	79	124	74	1.98607e-06
ENSG00000162733	DDR2	chr1	+	162743258	162743386	162741813	162742037	162745441	162745633	297	0	691	55	147	74	4.72038e-09	1.11842e-07	1	0.863	0.137	297	0	801	46	147	74	6.6207e-07	1.30599e-05	1	0.898	0.102	297	0	356	27	147	74	1.12147e-07	2.50986e-06	1	0.869	0.131	297	0	778	37	147	74	7.98463e-06
ENSG00000117523	PRRC2C	chr1	+	171537385	171537478	171535730	171535982	171540458	171540560	255	0	564	23	147	74	0.000196659	0.00191722	1	0.925	0.075	255	0	270	16	147	74	2.59764e-05	0.000365739	1	0.895	0.105	255	0	134	8	147	74	0.00021934	0.00233144	1	0.894	0.106	255	0	337	13	147	74	0.000705832
ENSG00000117523	PRRC2C	chr1	+	171560290	171560339	171557517	171557644	171560725	171561362	122	87	93	321	122	74	0	0	0.46	0.149	0.311	122	87	45	189	122	74	0	0	0.46	0.126	0.334	122	87	34	97	122	74	3.54232e-09	9.85482e-08	0.46	0.175	0.285	122	87	61	151	122	74	7.54819e-10
ENSG00000143337	TOR1AIP1	chr1	+	179870436	179870523	179869260	179869302	179873100	179873157	111	0	545	48	147	74	9.77858e-05	0.00103979	1	0.851	0.149	111	0	383	33	147	74	0.0001582	0.00179432	1	0.854	0.146	111	0	228	31	147	74	4.34547e-06	7.26173e-05	1	0.787	0.213	111	0	372	31	147	74	0.000211393
ENSG00000058668	ATP2B4	chr1	+	203682292	203682380	203681087	203681267	203683298	203683405	287	0	347	16	147	74	7.82168e-05	0.000852376	1	0.916	0.084	287	0	531	40	147	74	4.48647e-08	1.06646e-06	1	0.87	0.13	287	0	349	27	147	74	1.29046e-07	2.86721e-06	1	0.867	0.133	287	0	415	22	147	74	1.15774e-05
ENSG00000196352	CD55	chr1	+	207512741	207512762	207510037	207510754	207532890	207534311	603	0	189	12	94	74	1.00257e-06	1.69157e-05	1	0.925	0.075	603	0	456	19	94	74	3.11239e-06	5.42073e-05	1	0.95	0.05	603	0	425	22	94	74	1.03179e-07	2.32502e-06	1	0.938	0.062	603	0	281	16	94	74	3.12324e-07
ENSG00000196878	LAMB3	chr1	-	209803959	209804080	209803081	209803270	209805927	209806121	3850	0	1087	39	147	74	0	0	1	0.933	0.067	3850	0	1450	63	147	74	0	0	1	0.921	0.079	3850	0	694	24	147	74	1.59128e-12	6.27009e-11	1	0.936	0.064	3850	0	1493	42	147	74	3.33067e-16
ENSG00000196878	LAMB3	chr1	-	209807791	209807943	209806414	209806478	209811252	209811326	1220	34	445	37	147	74	1.06615e-05	0.00014513	0.948	0.858	0.09	1220	34	544	47	147	74	9.33263e-07	1.7886e-05	0.948	0.854	0.094	1220	34	269	31	147	74	1.30763e-07	2.90144e-06	0.948	0.814	0.134	1220	34	600	61	147	74	1.64147e-09
ENSG00000196878	LAMB3	chr1	-	209807791	209807983	209806414	209806478	209811252	209811326	2657	34	824	37	147	74	3.68811e-07	6.71009e-06	0.975	0.918	0.057	2657	34	1049	47	147	74	4.12923e-08	9.87561e-07	0.975	0.918	0.057	2657	34	494	31	147	74	2.94835e-09	8.31044e-08	0.975	0.889	0.086	2657	34	1163	61	147	74	2.78314e-11
ENSG00000136636	KCTD3	chr1	+	215751271	215751424	215751012	215751071	215752342	215752480	130	0	199	33	147	74	8.65501e-08	1.73681e-06	1	0.752	0.248	130	0	167	25	147	74	6.31092e-07	1.25212e-05	1	0.771	0.229	130	0	111	9	147	74	0.000672027	0.00600565	1	0.861	0.139	130	0	156	14	147	74	0.000153247
ENSG00000136636	KCTD3	chr1	+	215751273	215751424	215751012	215751071	215752342	215752480	121	0	187	33	147	74	1.0163e-07	2.01477e-06	1	0.74	0.26	121	0	150	25	147	74	4.61489e-07	9.42678e-06	1	0.751	0.249	121	0	107	9	147	74	0.000779694	0.00681914	1	0.857	0.143	121	0	145	14	147	74	0.000151238
ENSG00000136636	KCTD3	chr1	+	215751343	215751424	215751012	215751071	215752342	215752480	210	0	326	33	147	74	9.03662e-08	1.80768e-06	1	0.833	0.167	210	0	250	25	147	74	2.74923e-07	5.83634e-06	1	0.834	0.166	210	0	170	9	147	74	0.000653557	0.00587258	1	0.905	0.095	210	0	255	14	147	74	0.000199667
ENSG00000136636	KCTD3	chr1	+	215751347	215751424	215751012	215751071	215752342	215752480	120	0	193	33	147	74	1.5993e-07	3.08636e-06	1	0.746	0.254	120	0	157	25	147	74	7.83622e-07	1.52374e-05	1	0.76	0.24	120	0	109	9	147	74	0.000879529	0.00753234	1	0.859	0.141	120	0	150	14	147	74	0.000194194
ENSG00000143740	SNAP47	chr1	+	227935392	227935934	227922696	227923200	227946695	227947186	70	0	127	13	147	74	0.00218435	0.0146054	1	0.831	0.169	70	0	85	10	147	74	0.00168633	0.0130919	1	0.811	0.189	70	0	48	7	147	74	0.00136137	0.0107576	1	0.775	0.225	70	0	66	6	147	74	0.00842477
ENSG00000135766	EGLN1	chr1	-	231506307	231506444	231503314	231503382	231509725	231509845	181	0	138	12	147	74	3.79206e-05	0.000449035	1	0.853	0.147	181	0	378	31	147	74	4.89105e-06	8.18689e-05	1	0.86	0.14	181	0	326	22	147	74	5.01293e-05	0.000642298	1	0.882	0.118	181	0	270	32	147	74	8.94074e-08
ENSG00000173726	TOMM20	chr1	-	235282653	235282721	235277082	235277225	235283132	235283214	15	0	8	24	141	74	4.46305e-07	8.01113e-06	1	0.149	0.851	15	0	32	17	141	74	0.00287761	0.0201695	1	0.497	0.503	15	0	16	15	141	74	0.000368011	0.00362661	1	0.359	0.641	15	0	19	17	141	74	0.000362925
ENSG00000173726	TOMM20	chr1	-	235282653	235282732	235277082	235277225	235283132	235283214	14	0	4	24	147	74	4.16038e-08	8.71657e-07	1	0.077	0.923	14	0	25	17	147	74	0.00161752	0.0126531	1	0.425	0.575	14	0	9	15	147	74	5.53509e-05	0.000702374	1	0.232	0.768	14	0	12	17	147	74	7.9774e-05
ENSG00000162852	CNST	chr1	+	246784730	246784886	246754813	246755243	246795195	246795226	30	0	45	12	147	74	0.00224833	0.0149409	1	0.654	0.346	30	0	32	13	147	74	0.000328156	0.00332116	1	0.553	0.447	30	0	33	12	147	74	0.000625909	0.00566762	1	0.581	0.419	30	0	43	21	147	74	4.85555e-05
ENSG00000162852	CNST	chr1	+	246784730	246784936	246754813	246755243	246795195	246795226	54	0	78	12	147	74	0.00137691	0.010045	1	0.766	0.234	54	0	76	13	147	74	0.000760607	0.00677375	1	0.746	0.254	54	0	76	12	147	74	0.00122899	0.0098926	1	0.761	0.239	54	0	61	21	147	74	3.86933e-06
ENSG00000165623	UCMA	chr10	-	13275537	13275651	13271610	13271709	13275734	13275800	6884	278	4348	410	147	74	0	0	0.926	0.842	0.084	6884	278	2980	335	147	74	0	0	0.926	0.817	0.109	6884	278	9715	1046	147	74	0	0	0.926	0.824	0.102	6884	278	11643	899	147	74	0
ENSG00000165623	UCMA	chr10	-	13275544	13275633	13271610	13271709	13275734	13275800	6202	278	3309	410	147	74	0	0	0.918	0.802	0.116	6202	278	2270	335	147	74	0	0	0.918	0.773	0.145	6202	278	7507	1046	147	74	0	0	0.918	0.783	0.135	6202	278	9311	899	147	74	0
ENSG00000165623	UCMA	chr10	-	13275544	13275633	13271610	13271709	13276200	13276334	29	64	11	197	147	74	5.71624e-09	1.33694e-07	0.186	0.027	0.159	29	64	1	166	147	74	1.09912e-13	4.70322e-12	0.186	0.003	0.183	29	64	23	176	147	74	8.28224e-05	0.000999025	0.186	0.062	0.124	29	64	7	561	147	74	0
ENSG00000165623	UCMA	chr10	-	13275544	13275651	13271610	13271709	13275734	13275800	56	278	29	410	147	74	8.89943e-06	0.000123322	0.092	0.034	0.058	56	278	15	335	147	74	4.66804e-08	1.10601e-06	0.092	0.022	0.07	56	278	79	1046	147	74	4.25888e-07	8.52712e-06	0.092	0.037	0.055	56	278	47	899	147	74	2.03331e-10
ENSG00000079332	SAR1A	chr10	-	71922445	71922515	71921613	71921687	71930168	71930279	93	114	24	245	143	74	0	0	0.297	0.048	0.249	93	114	53	180	143	74	8.07427e-07	1.56557e-05	0.297	0.132	0.165	93	114	59	155	143	74	0.000211394	0.0022587	0.297	0.165	0.132	93	114	76	181	143	74	0.000664286
ENSG00000119977	TCTN3	chr10	-	97440228	97440388	97423152	97424057	97442407	97442561	102	0	283	16	147	74	0.00461557	0.0268674	1	0.899	0.101	102	0	119	8	147	74	0.00461283	0.029451	1	0.882	0.118	102	0	88	8	147	74	0.00144349	0.0112887	1	0.847	0.153	102	0	110	14	147	74	8.10482e-05
ENSG00000077147	TM9SF3	chr10	-	98303832	98303963	98292807	98292947	98307651	98307746	621	0	1576	59	147	74	1.663e-08	3.65428e-07	1	0.931	0.069	621	0	974	37	147	74	6.38723e-08	1.48594e-06	1	0.93	0.07	621	0	746	43	147	74	3.11456e-11	1.10194e-09	1	0.897	0.103	621	0	910	40	147	74	5.11253e-09
ENSG00000198873	GRK5	chr10	+	121086027	121086123	120967100	120967481	121140326	121140439	123	0	175	14	147	74	0.000407388	0.0035811	1	0.863	0.137	123	0	75	13	147	74	3.55046e-06	6.10963e-05	1	0.744	0.256	123	0	70	14	147	74	8.7148e-07	1.65531e-05	1	0.716	0.284	123	0	59	25	147	74	7.30549e-12
ENSG00000107949	BCCIP	chr10	+	127519130	127519220	127516126	127516207	127519988	127520176	307	0	882	47	147	74	1.08114e-06	1.81092e-05	1	0.904	0.096	307	0	435	38	147	74	2.73191e-09	7.70877e-08	1	0.852	0.148	307	0	371	42	147	74	2.48177e-11	8.88922e-10	1	0.816	0.184	307	0	508	45	147	74	1.07193e-09
ENSG00000177697	CD151	chr11	+	834534	834745	832996	833026	836062	836153	25	176	1	189	147	74	7.56305e-07	1.30506e-05	0.067	0.003	0.064	25	176	0	168	147	74	6.23816e-07	1.24106e-05	0.067	0	0.067	25	176	0	146	147	74	2.07433e-06	3.68942e-05	0.067	0	0.067	25	176	1	166	147	74	2.56903e-06
ENSG00000214063	TSPAN4	chr11	+	847200	847300	842823	842915	850287	850367	143	1	114	30	147	74	1.88161e-09	4.66915e-08	0.986	0.657	0.329	143	1	124	23	147	74	5.08655e-07	1.03284e-05	0.986	0.731	0.255	143	1	178	37	147	74	1.56895e-08	3.99866e-07	0.986	0.708	0.278	143	1	126	22	147	74	1.1416e-06
ENSG00000070081	NUCB2	chr11	+	17304335	17304490	17298311	17298375	17316870	17317014	112	0	283	19	147	74	0.00116589	0.00873861	1	0.882	0.118	112	0	118	11	147	74	0.000457451	0.0043866	1	0.844	0.156	112	0	227	17	147	74	0.000733366	0.0064646	1	0.87	0.13	112	0	140	10	147	74	0.00187248
ENSG00000175216	CKAP5	chr11	-	46774184	46774260	46772895	46773084	46774859	46775047	136	0	402	28	147	74	0.000203878	0.00197774	1	0.878	0.122	136	0	147	7	147	74	0.0073054	0.0423163	1	0.914	0.086	136	0	93	6	147	74	0.00325057	0.0218185	1	0.886	0.114	136	0	169	12	147	74	0.000598383
ENSG00000255717	SNHG1	chr11	-	62622359	62622410	62621990	62622023	62622604	62622708	387	33	237	43	124	74	0.00210406	0.0141504	0.875	0.767	0.108	387	33	487	95	124	74	5.21284e-05	0.000681576	0.875	0.754	0.121	387	33	439	124	124	74	5.92746e-10	1.8074e-08	0.875	0.679	0.196	387	33	378	81	124	74	1.24902e-05
ENSG00000068971	PPP2R5B	chr11	+	64694183	64694380	64693319	64693405	64695273	64695375	143	0	135	6	147	74	0.00972985	0.0482321	1	0.919	0.081	143	0	210	13	147	74	0.000837574	0.00732522	1	0.89	0.11	143	0	110	11	147	74	8.40977e-05	0.00101217	1	0.834	0.166	143	0	140	12	147	74	0.000163892
ENSG00000133884	DPF2	chr11	+	65111461	65111540	65111215	65111308	65113136	65113274	89	0	162	11	147	74	0.00510239	0.0290898	1	0.881	0.119	89	0	151	16	147	74	0.000420648	0.00409262	1	0.826	0.174	89	0	82	12	147	74	0.000119873	0.00138452	1	0.775	0.225	89	0	104	18	147	74	1.45199e-05
ENSG00000173442	EHBP1L1	chr11	+	65351062	65351236	65349369	65349436	65351711	65351869	131	3	73	10	147	74	0.00406831	0.0242791	0.956	0.786	0.17	131	3	63	18	147	74	2.34856e-06	4.18517e-05	0.956	0.638	0.318	131	3	35	12	147	74	6.07713e-06	9.83491e-05	0.956	0.595	0.361	131	3	49	19	147	74	7.95315e-08
ENSG00000165458	INPPL1	chr11	+	71940706	71940796	71940508	71940602	71940967	71941063	254	0	390	39	147	74	4.94425e-09	1.1669e-07	1	0.834	0.166	254	0	278	15	147	74	6.30805e-05	0.000804734	1	0.903	0.097	254	0	236	12	147	74	0.000166368	0.00183497	1	0.908	0.092	254	0	177	10	147	74	0.000147899
ENSG00000255245	FXYD6-FXYD2	chr11	-	117710951	117711083	117710495	117710545	117711862	117711899	753	8	381	15	147	74	0.0024477	0.0160244	0.979	0.927	0.052	753	8	640	45	147	74	8.01483e-09	2.13368e-07	0.979	0.877	0.102	753	8	450	33	147	74	3.40904e-08	8.30557e-07	0.979	0.873	0.106	753	8	392	32	147	74	6.80117e-09
ENSG00000137726	FXYD6	chr11	-	117711058	117711083	117710495	117710545	117711862	117711899	205	8	122	15	98	74	0.00972576	0.0482259	0.951	0.86	0.091	205	8	271	45	98	74	3.33161e-05	0.000457749	0.951	0.82	0.131	205	8	173	33	98	74	1.56887e-05	0.000228703	0.951	0.798	0.153	205	8	156	32	98	74	6.98832e-06
ENSG00000151500	THYN1	chr11	-	134118702	134118730	134118172	134118378	134119060	134119156	22	3	26	33	101	74	0.000125329	0.00129504	0.843	0.366	0.477	22	3	12	37	101	74	1.31018e-07	2.92108e-06	0.843	0.192	0.651	22	3	7	24	101	74	6.80669e-07	1.31832e-05	0.843	0.176	0.667	22	3	18	37	101	74	2.76559e-06
ENSG00000151500	THYN1	chr11	-	134118702	134118853	134118172	134118378	134119060	134119156	74	3	89	33	147	74	8.96849e-06	0.000124177	0.925	0.576	0.349	74	3	39	37	147	74	3.61666e-11	1.26748e-09	0.925	0.347	0.578	74	3	50	24	147	74	2.21232e-06	3.9038e-05	0.925	0.512	0.413	74	3	60	37	147	74	1.3181e-08
ENSG00000139044	B4GALNT3	chr12	+	657189	657268	655811	655879	657396	657463	164	0	603	73	147	74	3.0465e-08	6.51431e-07	1	0.806	0.194	164	0	239	16	147	74	0.000181771	0.00201603	1	0.883	0.117	164	0	177	10	147	74	0.00109095	0.00898581	1	0.899	0.101	164	0	278	18	147	74	0.000183059
ENSG00000255661	RP11-59H1.3	chr12	+	12976803	12976950	12976136	12976253	12977473	12977611	381	0	433	15	147	74	0.000140706	0.00143011	1	0.936	0.064	381	0	681	43	147	74	1.03298e-08	2.70314e-07	1	0.889	0.111	381	0	562	52	147	74	6.18061e-12	2.31486e-10	1	0.845	0.155	381	0	558	26	147	74	2.40063e-06
ENSG00000134532	SOX5	chr12	-	23699249	23699358	23696144	23696318	23716191	23716337	238	0	697	23	147	74	0.00115797	0.00869329	1	0.938	0.062	238	0	309	13	147	74	0.000594538	0.00548351	1	0.923	0.077	238	0	115	8	147	74	0.000133386	0.00151395	1	0.879	0.121	238	0	331	10	147	74	0.00465699
ENSG00000134294	SLC38A2	chr12	-	46756803	46756928	46756276	46756421	46757508	46757609	802	0	3687	181	147	74	5.77316e-15	2.36839e-13	1	0.911	0.089	802	0	2654	146	147	74	3.33067e-16	1.66384e-14	1	0.901	0.099	802	0	2612	117	147	74	3.72147e-13	1.52878e-11	1	0.918	0.082	802	0	2068	97	147	74	2.38809e-13
ENSG00000066117	SMARCD1	chr12	+	50488171	50488355	50484275	50484373	50492496	50492598	20	0	37	23	147	74	0.000203229	0.00197333	1	0.447	0.553	20	0	16	20	147	74	5.8481e-06	9.60626e-05	1	0.287	0.713	20	0	14	9	147	74	0.000893778	0.0076352	1	0.439	0.561	20	0	23	12	147	74	0.00114286
ENSG00000066117	SMARCD1	chr12	+	50488219	50488355	50484275	50484373	50492496	50492598	94	0	362	23	147	74	0.00309484	0.01941	1	0.888	0.112	94	0	162	20	147	74	8.24095e-05	0.00101389	1	0.803	0.197	94	0	90	9	147	74	0.00109617	0.00901967	1	0.834	0.166	94	0	134	12	147	74	0.00112976
ENSG00000172819	RARG	chr12	-	53607170	53607346	53606868	53607027	53607842	53608019	33	0	1	32	147	74	0	0	1	0.015	0.985	33	0	44	36	147	74	1.00872e-07	2.28346e-06	1	0.381	0.619	33	0	56	22	147	74	8.17889e-05	0.000987527	1	0.562	0.438	33	0	4	21	147	74	2.83973e-12
ENSG00000172819	RARG	chr12	-	53607279	53607346	53606868	53607027	53607842	53608019	346	0	616	32	140	74	1.09493e-06	1.83101e-05	1	0.911	0.089	346	0	465	36	140	74	4.20807e-09	1.16043e-07	1	0.872	0.128	346	0	373	22	140	74	9.41434e-07	1.77584e-05	1	0.9	0.1	346	0	289	21	140	74	1.24918e-07
ENSG00000172819	RARG	chr12	-	53609429	53609578	53609076	53609218	53624952	53625019	312	0	648	30	147	74	1.00789e-05	0.000137901	1	0.916	0.084	312	0	393	41	147	74	8.84771e-11	2.97472e-09	1	0.828	0.172	312	0	282	26	147	74	6.87218e-09	1.83112e-07	1	0.845	0.155	312	0	321	22	147	74	4.75711e-07
ENSG00000172819	RARG	chr12	-	53621145	53621471	53609076	53609218	53624952	53625016	163	0	226	30	147	74	1.0294e-07	2.03916e-06	1	0.791	0.209	163	0	229	41	147	74	5.92078e-10	1.81925e-08	1	0.738	0.262	163	0	204	26	147	74	2.65486e-07	5.53628e-06	1	0.798	0.202	163	0	186	22	147	74	9.97867e-07
ENSG00000092841	MYL6	chr12	+	56553378	56553514	56552467	56552495	56553758	56553932	350	78	65	114	147	74	0	0	0.693	0.223	0.47	350	78	69	103	147	74	0	0	0.693	0.252	0.441	350	78	321	117	147	74	0.0027935	0.019298	0.693	0.58	0.113	350	78	235	125	147	74	1.40463e-07
ENSG00000196531	NACA	chr12	-	57109654	57109871	57108385	57108471	57118235	57118307	55	32	2	155	147	74	0	0	0.464	0.006	0.458	55	32	12	193	147	74	0	0	0.464	0.03	0.434	55	32	6	156	147	74	0	0	0.464	0.019	0.445	55	32	6	114	147	74	0
ENSG00000061987	MON2	chr12	+	62959793	62959811	62959016	62959160	62960101	62960230	33	14	9	50	91	74	6.25345e-09	1.45589e-07	0.657	0.128	0.529	33	14	8	40	91	74	9.22115e-08	2.09785e-06	0.657	0.14	0.517	33	14	0	26	91	74	3.11377e-10	9.83575e-09	0.657	0	0.657	33	14	6	40	91	74	1.15805e-08
ENSG00000111530	CAND1	chr12	+	67686401	67686556	67675689	67675833	67688812	67688936	173	0	529	54	147	74	2.47672e-07	4.64053e-06	1	0.831	0.169	173	0	271	25	147	74	4.00647e-06	6.84687e-05	1	0.845	0.155	173	0	130	18	147	74	2.88541e-07	5.98157e-06	1	0.784	0.216	173	0	211	20	147	74	5.76147e-06
ENSG00000075415	SLC25A3	chr12	+	98989210	98989335	98987463	98987913	98991633	98991814	159	10	102	157	147	74	0	0	0.889	0.246	0.643	159	10	178	194	147	74	0	0	0.889	0.316	0.573	159	10	85	177	147	74	0	0	0.889	0.195	0.694	159	10	60	104	147	74	0
ENSG00000075415	SLC25A3	chr12	+	98989210	98989439	98987756	98987913	98991633	98991813	89	10	60	157	147	74	0	0	0.818	0.161	0.657	89	10	127	194	147	74	0	0	0.818	0.248	0.57	89	10	115	177	147	74	0	0	0.818	0.246	0.572	89	10	82	104	147	74	2.44249e-15
ENSG00000075415	SLC25A3	chr12	+	98989504	98989626	98987752	98987913	98991633	98991813	3372	10	3032	157	147	74	0	0	0.994	0.907	0.087	3372	10	3666	194	147	74	0	0	0.994	0.905	0.089	3372	10	3526	177	147	74	0	0	0.994	0.909	0.085	3372	10	2775	104	147	74	0
ENSG00000075415	SLC25A3	chr12	+	98989506	98989626	98987756	98987913	98991633	98992341	1880	10	1718	157	147	74	0	0	0.99	0.846	0.144	1880	10	2055	194	147	74	0	0	0.99	0.842	0.148	1880	10	2044	177	147	74	0	0	0.99	0.853	0.137	1880	10	1585	104	147	74	0
ENSG00000111237	VPS29	chr12	-	110937339	110937351	110933816	110934008	110939853	110939912	39	37	1	61	85	74	2.84706e-12	9.62964e-11	0.479	0.014	0.465	39	37	0	16	85	74	2.65114e-05	0.000372504	0.479	0	0.479	39	37	1	20	85	74	3.6868e-05	0.00048959	0.479	0.042	0.437	39	37	0	16	85	74	2.65114e-05
ENSG00000122965	RBM19	chr12	-	114387887	114387959	114386637	114386841	114390316	114390395	68	0	167	31	145	74	2.63537e-05	0.000325945	1	0.733	0.267	68	0	49	16	145	74	1.86025e-06	3.37558e-05	1	0.61	0.39	68	0	43	8	145	74	0.000430114	0.00413915	1	0.733	0.267	68	0	79	7	145	74	0.0082711
ENSG00000176871	WSB2	chr12	-	118476092	118476193	118474142	118474315	118480645	118480777	298	0	618	19	147	74	0.000725412	0.00584627	1	0.942	0.058	298	0	337	20	147	74	4.10651e-06	7.00031e-05	1	0.895	0.105	298	0	255	10	147	74	0.000563555	0.00518601	1	0.928	0.072	298	0	299	16	147	74	2.00722e-05
ENSG00000121741	ZMYM2	chr13	+	20656920	20656988	20656155	20656270	20657086	20657172	163	0	202	9	141	74	0.00386503	0.0232789	1	0.922	0.078	163	0	261	10	141	74	0.0062485	0.0374711	1	0.932	0.068	163	0	187	11	141	74	0.000796418	0.00693961	1	0.899	0.101	163	0	227	21	141	74	1.03258e-05
ENSG00000139793	MBNL2	chr13	+	98018712	98018807	98009735	98009889	98043575	98044262	83	8	53	69	147	74	5.58442e-14	2.12634e-12	0.839	0.279	0.56	83	8	87	46	147	74	3.94787e-06	6.75729e-05	0.839	0.488	0.351	83	8	80	29	147	74	0.000998585	0.00836784	0.839	0.581	0.258	83	8	70	23	147	74	0.00368128
ENSG00000165801	ARHGEF40	chr14	+	21549031	21549171	21548818	21548941	21549667	21550278	184	0	391	26	147	74	3.70987e-05	0.000441143	1	0.883	0.117	184	0	224	16	147	74	5.78119e-05	0.000745886	1	0.876	0.124	184	0	148	9	147	74	0.000578879	0.00531114	1	0.892	0.108	184	0	123	13	147	74	6.68356e-06
ENSG00000165801	ARHGEF40	chr14	+	21549031	21549175	21548818	21548941	21549667	21550278	336	0	725	26	147	74	7.33989e-05	0.000807134	1	0.933	0.067	336	0	403	16	147	74	9.0706e-05	0.0011055	1	0.927	0.073	336	0	255	9	147	74	0.000804437	0.00699338	1	0.934	0.066	336	0	248	13	147	74	2.20942e-05
ENSG00000151327	FAM177A1	chr14	+	35522483	35522657	35515608	35515834	35546355	35546422	375	0	466	14	147	74	0.000465733	0.00401829	1	0.944	0.056	375	0	364	24	147	74	8.05584e-08	1.84659e-06	1	0.884	0.116	375	0	309	14	147	74	2.6132e-05	0.000360948	1	0.917	0.083	375	0	286	10	147	74	0.000419775
ENSG00000151332	MBIP	chr14	-	36777304	36777395	36769990	36770029	36780778	36780931	152	2	131	18	147	74	7.74415e-05	0.000845194	0.975	0.786	0.189	152	2	143	18	147	74	0.000155493	0.0017678	0.975	0.8	0.175	152	2	117	17	147	74	5.93239e-05	0.000744028	0.975	0.776	0.199	152	2	121	18	147	74	4.02147e-05
ENSG00000100941	PNN	chr14	+	39646800	39646891	39646615	39646688	39647044	39647120	295	0	597	26	147	74	3.6021e-05	0.000429331	1	0.92	0.08	295	0	753	44	147	74	6.35009e-07	1.25852e-05	1	0.896	0.104	295	0	448	34	147	74	5.00789e-08	1.19177e-06	1	0.869	0.131	295	0	434	32	147	74	8.95244e-08
ENSG00000100504	PYGL	chr14	-	51404453	51404555	51401824	51401903	51410878	51411174	510	3	625	22	147	74	0.000490318	0.00419342	0.988	0.935	0.053	510	3	1225	54	147	74	5.98884e-06	9.81972e-05	0.988	0.919	0.069	510	3	779	31	147	74	7.1297e-05	0.000874579	0.988	0.927	0.061	510	3	1653	72	147	74	4.07598e-06
ENSG00000100644	HIF1A	chr14	+	62204804	62205091	62203606	62203827	62211422	62211531	743	0	1419	232	147	74	0	0	1	0.755	0.245	743	0	1186	196	147	74	0	0	1	0.753	0.247	743	0	1005	201	147	74	0	0	1	0.716	0.284	743	0	885	193	147	74	0
ENSG00000100644	HIF1A	chr14	+	62207222	62207345	62204804	62205091	62207472	62207906	1396	0	2668	111	147	74	0	0	1	0.924	0.076	1396	0	2277	99	147	74	0	0	1	0.92	0.08	1396	0	1865	128	147	74	0	0	1	0.88	0.12	1396	0	1550	75	147	74	0
ENSG00000133961	NUMB	chr14	-	73750788	73751082	73749066	73749213	73753817	73754022	379	0	302	25	147	74	3.34332e-09	8.06041e-08	1	0.859	0.141	379	0	382	18	147	74	7.35878e-06	0.000118489	1	0.914	0.086	379	0	251	12	147	74	2.91438e-05	0.000398301	1	0.913	0.087	379	0	310	36	147	74	1.1745e-12
ENSG00000214548	MEG3	chr14	+	101295044	101295153	101292462	101292554	101295370	101296086	2088	0	2276	121	147	74	0	0	1	0.904	0.096	2088	0	7307	390	147	74	0	0	1	0.904	0.096	2088	0	4781	264	147	74	0	0	1	0.901	0.099	2088	0	4958	255	147	74	0
ENSG00000214548	MEG3	chr14	+	101295057	101295153	101292455	101292554	101295370	101295522	1243	0	1399	121	147	74	0	0	1	0.853	0.147	1243	0	4469	390	147	74	0	0	1	0.852	0.148	1243	0	2852	264	147	74	0	0	1	0.845	0.155	1243	0	3127	255	147	74	0
ENSG00000214548	MEG3	chr14	+	101297757	101297871	101295370	101296086	101298848	101298978	443	42	268	72	147	74	3.96085e-07	7.17551e-06	0.842	0.652	0.19	443	42	1029	159	147	74	0.00573504	0.0349954	0.842	0.765	0.077	443	42	564	134	147	74	2.74696e-07	5.71382e-06	0.842	0.679	0.163	443	42	689	172	147	74	1.5431e-08
ENSG00000214548	MEG3	chr14	+	101298848	101298978	101296045	101296086	101300968	101301088	47	0	82	128	147	74	0	0	1	0.244	0.756	47	0	175	668	147	74	0	0	1	0.117	0.883	47	0	145	325	147	74	0	0	1	0.183	0.817	47	0	187	320	147	74	0
ENSG00000075413	MARK3	chr14	+	103958113	103958371	103946723	103946827	103964838	103964865	346	0	565	17	147	74	0.000469322	0.00404308	1	0.944	0.056	346	0	479	31	147	74	8.19415e-08	1.87672e-06	1	0.886	0.114	346	0	304	17	147	74	3.90115e-06	6.58548e-05	1	0.9	0.1	346	0	390	38	147	74	8.04583e-11
ENSG00000068793	CYFIP1	chr15	+	22925975	22926065	22925749	22925899	22928128	22928206	249	0	313	15	147	74	0.000159328	0.00159328	1	0.913	0.087	249	0	239	17	147	74	5.94139e-06	9.74484e-05	1	0.876	0.124	249	0	163	8	147	74	0.000641653	0.00578298	1	0.911	0.089	249	0	156	7	147	74	0.00136142
ENSG00000114062	UBE3A	chr15	-	25652213	25652409	25650607	25650649	25654234	25654354	11	0	10	37	147	74	1.11309e-06	1.85832e-05	1	0.12	0.88	11	0	2	15	147	74	2.54855e-06	4.50627e-05	1	0.063	0.937	11	0	6	7	147	74	0.0032791	0.0219488	1	0.301	0.699	11	0	8	22	147	74	1.6392e-05
ENSG00000067369	TP53BP1	chr15	-	43724391	43724875	43720213	43720366	43730521	43730614	89	0	251	27	147	74	0.00019808	0.00192923	1	0.824	0.176	89	0	184	27	147	74	2.12138e-05	0.000306671	1	0.774	0.226	89	0	118	11	147	74	0.00137136	0.0108192	1	0.844	0.156	89	0	138	14	147	74	0.000643704
ENSG00000104064	GABPB1	chr15	-	50595125	50595320	50593453	50593565	50596162	50596330	219	0	307	19	147	74	3.40416e-05	0.00040813	1	0.891	0.109	219	0	345	15	147	74	0.000578041	0.0053585	1	0.92	0.08	219	0	179	7	147	74	0.00360641	0.02369	1	0.928	0.072	219	0	290	22	147	74	4.25412e-06
ENSG00000140416	TPM1	chr15	+	63336225	63336351	63335904	63336030	63349183	63349317	696	13	234	49	147	74	0	0	0.964	0.706	0.258	696	13	81	21	147	74	4.18376e-12	1.60758e-10	0.964	0.66	0.304	696	13	92	12	147	74	1.41847e-05	0.000209259	0.964	0.794	0.17	696	13	63	15	147	74	3.2361e-09
ENSG00000140416	TPM1	chr15	+	63353911	63353987	63353396	63353472	63354413	63354476	794	84	90	328	147	74	0	0	0.826	0.121	0.705	794	84	85	110	147	74	0	0	0.826	0.28	0.546	794	84	110	84	147	74	0	0	0.826	0.397	0.429	794	84	48	72	147	74	0
ENSG00000166855	CLPX	chr15	-	65454941	65454983	65450912	65451089	65458968	65459123	108	0	140	13	115	74	0.000451092	0.00390656	1	0.874	0.126	108	0	224	25	115	74	4.532e-05	0.000602366	1	0.852	0.148	108	0	114	14	115	74	7.56848e-05	0.000920301	1	0.84	0.16	108	0	138	19	115	74	1.6131e-05
ENSG00000166855	CLPX	chr15	-	65456366	65456526	65450912	65451089	65458968	65459123	99	0	195	13	147	74	0.00307556	0.0193129	1	0.883	0.117	99	0	191	25	147	74	2.468e-05	0.000349469	1	0.794	0.206	99	0	123	14	147	74	0.000189515	0.00205589	1	0.816	0.184	99	0	160	19	147	74	8.16655e-05
ENSG00000166949	SMAD3	chr15	+	67457590	67457722	67457232	67457426	67459116	67459191	275	3	372	34	147	74	6.00745e-06	8.68426e-05	0.979	0.846	0.133	275	3	761	60	147	74	9.93393e-06	0.00015555	0.979	0.865	0.114	275	3	342	30	147	74	1.43108e-05	0.000210866	0.979	0.852	0.127	275	3	399	39	147	74	1.6422e-06
ENSG00000137818	RPLP1	chr15	+	69745985	69746060	69745122	69745359	69747508	69747626	1654	500	222	459	147	74	0	0	0.625	0.196	0.429	1654	500	297	775	147	74	0	0	0.625	0.162	0.463	1654	500	344	700	147	74	0	0	0.625	0.198	0.427	1654	500	329	465	147	74	0
ENSG00000117906	RCN2	chr15	+	77236098	77236212	77227866	77228063	77239761	77239858	1172	0	2239	65	147	74	1.00665e-10	2.91121e-09	1	0.945	0.055	1172	0	1278	40	147	74	3.8249e-10	1.19544e-08	1	0.941	0.059	1172	0	1363	41	147	74	6.87457e-10	2.08328e-08	1	0.944	0.056	1172	0	920	38	147	74	2.29283e-12
ENSG00000117906	RCN2	chr15	+	77236110	77236212	77227866	77228063	77239761	77239830	667	0	1286	65	147	74	1.2422e-11	3.96676e-10	1	0.909	0.091	667	0	743	40	147	74	5.6505e-11	1.94284e-09	1	0.903	0.097	667	0	753	41	147	74	3.89201e-11	1.36523e-09	1	0.902	0.098	667	0	545	38	147	74	5.84643e-13
ENSG00000041357	PSMA4	chr15	+	78834917	78834987	78834518	78834561	78836531	78836609	125	0	501	27	143	74	0.00164734	0.0116422	1	0.906	0.094	125	0	102	9	143	74	0.000545233	0.0050898	1	0.854	0.146	125	0	78	8	143	74	0.000361248	0.00357212	1	0.835	0.165	125	0	131	15	143	74	3.55281e-05
ENSG00000157766	ACAN	chr15	+	89415233	89415316	89398082	89402648	89417072	89417255	161	8	297	250	147	74	0	0	0.91	0.374	0.536	161	8	187	247	147	74	0	0	0.91	0.276	0.634	161	8	126	136	147	74	0	0	0.91	0.318	0.592	161	8	128	193	147	74	0
ENSG00000007392	LUC7L	chr16	-	258599	258663	258076	258187	270647	270746	127	57	44	311	137	74	0	0	0.546	0.071	0.475	127	57	179	212	137	74	1.52843e-07	3.36101e-06	0.546	0.313	0.233	127	57	66	182	137	74	0	0	0.546	0.164	0.382	127	57	147	171	137	74	6.5428e-07
ENSG00000102858	MGRN1	chr16	+	4730032	4730098	4727463	4727573	4731550	4731581	132	0	267	33	139	74	1.74134e-06	2.79704e-05	1	0.812	0.188	132	0	236	18	139	74	0.000247127	0.00261299	1	0.875	0.125	132	0	119	14	139	74	2.4999e-05	0.000347248	1	0.819	0.181	132	0	176	14	139	74	0.000292778
ENSG00000178952	TUFM	chr16	-	28856634	28856801	28856271	28856376	28857232	28857427	460	1	1182	35	147	74	0.000115673	0.00120506	0.996	0.944	0.052	460	1	478	31	147	74	1.68015e-08	4.24908e-07	0.996	0.886	0.11	460	1	481	17	147	74	0.000110846	0.00129147	0.996	0.934	0.062	460	1	403	18	147	74	1.27501e-05
ENSG00000102910	LONP2	chr16	+	48290520	48290652	48286041	48286276	48292528	48292651	72	0	152	25	147	74	5.60939e-05	0.000635948	1	0.754	0.246	72	0	128	15	147	74	0.000861	0.00749784	1	0.811	0.189	72	0	79	18	147	74	1.07724e-05	0.000163729	1	0.688	0.312	72	0	133	13	147	74	0.00234887
ENSG00000103479	RBL2	chr16	+	53513065	53513137	53504657	53504834	53513797	53513903	103	0	287	28	145	74	0.000134354	0.00137449	1	0.84	0.16	103	0	125	17	145	74	3.0975e-05	0.000428061	1	0.79	0.21	103	0	91	21	145	74	2.08014e-07	4.43361e-06	1	0.689	0.311	103	0	130	12	145	74	0.000626824
ENSG00000051108	HERPUD1	chr16	+	56969312	56969387	56969146	56969224	56970598	56971325	1000	0	1524	53	147	74	8.27721e-11	2.41435e-09	1	0.935	0.065	1000	0	3471	111	147	74	2.12673e-11	7.66986e-10	1	0.94	0.06	1000	0	1906	72	147	74	2.30527e-12	8.94727e-11	1	0.93	0.07	1000	0	2226	70	147	74	1.7541e-10
ENSG00000051108	HERPUD1	chr16	+	56969315	56969387	56969146	56969224	56970598	56970729	612	0	866	53	145	74	3.3934e-12	1.13867e-10	1	0.893	0.107	612	0	1920	111	145	74	3.33067e-13	1.37667e-11	1	0.898	0.102	612	0	1080	72	145	74	7.23865e-14	3.10858e-12	1	0.884	0.116	612	0	1269	70	145	74	7.10287e-12
ENSG00000051108	HERPUD1	chr16	+	56973806	56974157	56970635	56970729	56976043	56976149	502	0	835	28	147	74	5.7785e-06	8.38905e-05	1	0.938	0.062	502	0	1661	61	147	74	3.09263e-07	6.50715e-06	1	0.932	0.068	502	0	826	32	147	74	7.74352e-07	1.48863e-05	1	0.929	0.071	502	0	1010	69	147	74	3.49221e-12
ENSG00000135723	FHOD1	chr16	-	67270313	67270337	67268259	67268375	67270459	67270519	6	36	1	103	97	74	0.00170887	0.0119722	0.113	0.007	0.106	6	36	0	54	97	74	0.00360084	0.024112	0.113	0	0.113	6	36	0	40	97	74	0.00878212	0.0475419	0.113	0	0.113	6	36	0	68	97	74	0.00174032
ENSG00000090861	AARS	chr16	-	70296248	70296387	70294946	70295060	70298860	70298888	175	0	458	17	147	74	0.00323273	0.0201136	1	0.931	0.069	175	0	243	40	147	74	7.59554e-10	2.30274e-08	1	0.754	0.246	175	0	97	16	147	74	9.48816e-08	2.15184e-06	1	0.753	0.247	175	0	278	29	147	74	7.25536e-07
ENSG00000132613	MTSS1L	chr16	-	70713012	70713192	70712154	70712312	70713532	70713607	70	100	67	239	147	74	1.15061e-05	0.000155051	0.261	0.124	0.137	70	100	71	245	147	74	1.96866e-05	0.00028692	0.261	0.127	0.134	70	100	31	175	147	74	1.21855e-08	3.14803e-07	0.261	0.082	0.179	70	100	38	127	147	74	0.000374536
ENSG00000050820	BCAR1	chr16	-	75270725	75270896	75268786	75269884	75271080	75271242	82	0	146	14	147	74	0.00128679	0.00948585	1	0.84	0.16	82	0	125	24	147	74	6.32035e-06	0.000103168	1	0.724	0.276	82	0	85	11	147	74	0.000437006	0.00419142	1	0.795	0.205	82	0	78	18	147	74	3.27864e-06
ENSG00000050820	BCAR1	chr16	-	75270775	75270896	75269565	75269884	75271080	75271329	83	0	142	14	147	74	0.00106111	0.0080964	1	0.836	0.164	83	0	123	24	147	74	4.95777e-06	8.28586e-05	1	0.721	0.279	83	0	85	11	147	74	0.000410337	0.00397526	1	0.795	0.205	83	0	77	18	147	74	2.66614e-06
ENSG00000050820	BCAR1	chr16	-	75270779	75270896	75268786	75269884	75271080	75271242	230	0	360	14	147	74	0.000959075	0.00742477	1	0.928	0.072	230	0	332	24	147	74	3.4014e-06	5.87721e-05	1	0.874	0.126	230	0	221	11	147	74	0.000380435	0.00372828	1	0.91	0.09	230	0	220	18	147	74	2.74568e-06
ENSG00000179094	PER1	chr17	-	8048068	8048165	8046758	8047194	8049275	8049455	194	0	13	2	147	74	0.00467157	0.0271343	1	0.766	0.234	194	0	482	27	147	74	9.09731e-05	0.00110777	1	0.9	0.1	194	0	284	22	147	74	9.70932e-06	0.00014951	1	0.867	0.133	194	0	168	19	147	74	5.17408e-07
ENSG00000179094	PER1	chr17	-	8048077	8048311	8046583	8047194	8049275	8049455	129	0	14	2	147	74	0.0085562	0.0436847	1	0.779	0.221	129	0	633	27	147	74	0.00451456	0.0289591	1	0.922	0.078	129	0	290	22	147	74	0.000216343	0.00230308	1	0.869	0.131	129	0	163	19	147	74	1.32492e-05
ENSG00000166579	NDEL1	chr17	+	8358113	8358205	8354097	8354271	8363326	8363478	453	0	549	51	147	74	2.11942e-13	7.78445e-12	1	0.844	0.156	453	0	656	98	147	74	0	0	1	0.771	0.229	453	0	561	85	147	74	0	0	1	0.769	0.231	453	0	689	76	147	74	1.11022e-16
ENSG00000131899	LLGL1	chr17	+	18140794	18141087	18140148	18140253	18141380	18141528	79	0	172	18	147	74	0.000753365	0.00604284	1	0.828	0.172	79	0	90	11	147	74	0.000695053	0.00626237	1	0.805	0.195	79	0	73	17	147	74	5.07936e-06	8.36598e-05	1	0.684	0.316	79	0	51	10	147	74	8.1644e-05
ENSG00000109046	WSB1	chr17	+	25634769	25634933	25633807	25633908	25636125	25636298	1070	17	329	121	147	74	0	0	0.969	0.578	0.391	1070	17	3044	212	147	74	1.65656e-12	6.56863e-11	0.969	0.878	0.091	1070	17	1005	117	147	74	0	0	0.969	0.812	0.157	1070	17	1357	68	147	74	4.68187e-06
ENSG00000109046	WSB1	chr17	+	25634769	25634945	25633807	25633908	25636125	25636298	1109	17	342	121	147	74	0	0	0.97	0.587	0.383	1109	17	3280	212	147	74	7.55196e-12	2.81849e-10	0.97	0.886	0.084	1109	17	1142	117	147	74	0	0	0.97	0.831	0.139	1109	17	1472	68	147	74	1.14952e-05
ENSG00000108296	CWC25	chr17	-	36966528	36966653	36965954	36966018	36966720	36966848	54	12	25	66	147	74	6.5552e-12	2.13895e-10	0.694	0.16	0.534	54	12	76	61	147	74	0.000176147	0.00196603	0.694	0.385	0.309	54	12	41	32	147	74	0.00112108	0.00918785	0.694	0.392	0.302	54	12	56	87	147	74	4.20309e-09
ENSG00000108344	PSMD3	chr17	+	38152435	38152591	38151676	38151780	38153582	38153633	877	0	2024	108	147	74	3.33067e-16	1.48885e-14	1	0.904	0.096	877	0	888	95	147	74	0	0	1	0.825	0.175	877	0	570	54	147	74	0	0	1	0.842	0.158	877	0	884	46	147	74	3.71259e-13
ENSG00000141756	FKBP10	chr17	+	39975461	39975651	39974633	39974779	39976520	39976713	478	0	666	69	147	74	4.44089e-16	1.97645e-14	1	0.829	0.171	478	0	755	71	147	74	4.44089e-15	2.09032e-13	1	0.843	0.157	478	0	891	109	147	74	0	0	1	0.804	0.196	478	0	542	54	147	74	8.77076e-15
ENSG00000141756	FKBP10	chr17	+	39975481	39975651	39974633	39974779	39976520	39976713	61	0	17	69	147	74	0	0	1	0.11	0.89	61	0	59	71	147	74	1.11022e-16	5.639e-15	1	0.295	0.705	61	0	42	109	147	74	0	0	1	0.162	0.838	61	0	33	54	147	74	0
ENSG00000168259	DNAJC7	chr17	-	40134263	40134419	40134001	40134025	40135580	40135654	200	0	510	28	147	74	8.13965e-05	0.000883054	1	0.902	0.098	200	0	291	17	147	74	0.000119147	0.00139874	1	0.896	0.104	200	0	260	15	147	74	0.000166493	0.00183569	1	0.897	0.103	200	0	359	25	147	74	1.41188e-05
ENSG00000168259	DNAJC7	chr17	-	40134272	40134419	40134001	40134025	40135580	40135654	286	0	724	28	147	74	0.000105824	0.00111432	1	0.929	0.071	286	0	398	17	147	74	0.00012025	0.00140957	1	0.922	0.078	286	0	341	15	147	74	0.000129511	0.00147814	1	0.92	0.08	286	0	482	25	147	74	1.05905e-05
ENSG00000068120	COASY	chr17	+	40716726	40716916	40716463	40716595	40717000	40717065	78	0	262	17	147	74	0.00730608	0.0386261	1	0.886	0.114	78	0	57	10	147	74	0.00015565	0.00176871	1	0.742	0.258	78	0	34	7	147	74	0.000217952	0.0023187	1	0.71	0.29	78	0	62	7	147	74	0.00228199
ENSG00000126581	BECN1	chr17	-	40967925	40968072	40966541	40966691	40970238	40970433	177	0	462	31	147	74	3.53312e-05	0.000422298	1	0.882	0.118	177	0	151	7	147	74	0.00359283	0.0240672	1	0.916	0.084	177	0	112	5	147	74	0.00738946	0.041576	1	0.919	0.081	177	0	177	10	147	74	0.000785272
ENSG00000108433	GOSR2	chr17	+	45008464	45008573	45006885	45006950	45012394	45014205	86	0	213	20	147	74	0.00075383	0.00604561	1	0.843	0.157	86	0	86	8	147	74	0.00257861	0.0184407	1	0.844	0.156	86	0	72	10	147	74	0.000295861	0.00301024	1	0.784	0.216	86	0	166	12	147	74	0.00420318
ENSG00000108433	GOSR2	chr17	+	45009432	45009565	45006885	45006950	45012394	45012535	101	0	243	20	147	74	0.000636778	0.00522887	1	0.859	0.141	101	0	86	8	147	74	0.00136766	0.0110156	1	0.844	0.156	101	0	45	10	147	74	8.94851e-06	0.00013932	1	0.694	0.306	101	0	165	12	147	74	0.00210886
ENSG00000185359	HGS	chr17	+	79662193	79662253	79661844	79662097	79662815	79662960	304	0	325	19	133	74	5.50161e-06	8.01911e-05	1	0.905	0.095	304	0	377	24	133	74	1.09308e-06	2.07122e-05	1	0.897	0.103	304	0	207	14	133	74	5.09376e-06	8.38689e-05	1	0.892	0.108	304	0	257	27	133	74	1.55129e-09
ENSG00000091164	TXNL1	chr18	-	54293392	54293497	54291518	54291692	54293591	54293688	47	216	19	484	147	74	1.76874e-10	4.97929e-09	0.099	0.019	0.08	47	216	29	445	147	74	1.0425e-06	1.98125e-05	0.099	0.032	0.067	47	216	14	254	147	74	3.29831e-06	5.63427e-05	0.099	0.027	0.072	47	216	17	265	147	74	1.47586e-05
ENSG00000090661	CERS4	chr19	+	8322762	8322869	8321832	8321961	8326571	8326728	96	0	179	11	147	74	0.00564065	0.0315388	1	0.891	0.109	96	0	109	8	147	74	0.00414698	0.0270331	1	0.873	0.127	96	0	97	7	147	74	0.00527433	0.0318687	1	0.875	0.125	96	0	36	4	147	74	0.0039602
ENSG00000105393	BABAM1	chr19	+	17382405	17382464	17379602	17379900	17384712	17384833	181	0	298	27	132	74	2.78308e-06	4.29015e-05	1	0.861	0.139	181	0	146	23	132	74	1.45694e-08	3.72426e-07	1	0.781	0.219	181	0	158	14	132	74	2.2051e-05	0.000310862	1	0.864	0.136	181	0	121	13	132	74	7.16565e-06
ENSG00000130309	COLGALT1	chr19	+	17683291	17683411	17679317	17679522	17688003	17688080	335	0	1063	42	147	74	1.45859e-05	0.000191976	1	0.927	0.073	335	0	749	20	147	74	0.000939177	0.00803132	1	0.95	0.05	335	0	454	14	147	74	0.000662495	0.00593989	1	0.942	0.058	335	0	468	18	147	74	8.85208e-05
ENSG00000257103	LSM14A	chr19	+	34710295	34710478	34706500	34706566	34710610	34710782	216	0	333	18	147	74	0.000112826	0.0011795	1	0.903	0.097	216	0	337	19	147	74	7.51645e-05	0.000937427	1	0.899	0.101	216	0	193	9	147	74	0.00107986	0.0089138	1	0.915	0.085	216	0	268	19	147	74	1.28112e-05
ENSG00000099341	PSMD8	chr19	+	38866799	38866872	38865427	38865601	38869879	38870045	471	0	718	22	146	74	4.15593e-05	0.000486788	1	0.943	0.057	471	0	435	16	146	74	2.19602e-05	0.000316539	1	0.932	0.068	471	0	354	14	146	74	1.98775e-05	0.000283304	1	0.928	0.072	471	0	415	21	146	74	3.40398e-07
ENSG00000196235	SUPT5H	chr19	+	39948933	39948945	39948314	39948380	39949457	39949527	15	0	11	40	85	74	1.98487e-08	4.31866e-07	1	0.193	0.807	15	0	24	22	85	74	0.000208354	0.00225766	1	0.487	0.513	15	0	19	21	85	74	9.23255e-05	0.00109964	1	0.441	0.559	15	0	30	22	85	74	0.000576518
ENSG00000079432	CIC	chr19	+	42795709	42795897	42794384	42795618	42796237	42796359	193	0	419	38	147	74	5.78332e-07	1.01798e-05	1	0.847	0.153	193	0	268	43	147	74	1.666e-10	5.44376e-09	1	0.758	0.242	193	0	168	22	147	74	6.42417e-08	1.49767e-06	1	0.794	0.206	193	0	194	36	147	74	4.44621e-11
ENSG00000079432	CIC	chr19	+	42796451	42796618	42796237	42796359	42796717	42797011	212	0	467	15	147	74	0.00336029	0.020755	1	0.94	0.06	212	0	306	14	147	74	0.000565763	0.00525629	1	0.917	0.083	212	0	215	16	147	74	1.63785e-05	0.000237844	1	0.871	0.129	212	0	237	14	147	74	0.000118847
ENSG00000011422	PLAUR	chr19	-	44169467	44169611	44160630	44160792	44171732	44171843	1458	0	2697	126	147	74	0	0	1	0.915	0.085	1458	0	1449	38	147	74	1.02185e-09	3.05219e-08	1	0.95	0.05	1458	0	751	27	147	74	7.30639e-11	2.48155e-09	1	0.933	0.067	1458	0	1433	46	147	74	3.09264e-12
ENSG00000104936	DMPK	chr19	-	46280584	46280848	46278206	46278292	46280924	46281131	135	0	134	10	147	74	0.0006772	0.00551981	1	0.871	0.129	135	0	197	19	147	74	3.89142e-05	0.000525669	1	0.839	0.161	135	0	217	14	147	74	0.000802892	0.00698736	1	0.886	0.114	135	0	158	9	147	74	0.00271207
ENSG00000104936	DMPK	chr19	-	46280599	46280848	46278206	46278292	46280924	46281131	104	0	102	10	147	74	0.000619206	0.00512013	1	0.837	0.163	104	0	142	19	147	74	2.48629e-05	0.000351786	1	0.79	0.21	104	0	160	14	147	74	0.000612881	0.00557529	1	0.852	0.148	104	0	130	9	147	74	0.00330122
ENSG00000104852	SNRNP70	chr19	+	49589661	49589818	49588679	49588893	49593547	49593610	876	0	2064	64	147	74	2.65377e-09	6.48401e-08	1	0.942	0.058	876	0	1154	46	147	74	9.88808e-11	3.31633e-09	1	0.927	0.073	876	0	989	26	147	74	1.25939e-06	2.3283e-05	1	0.95	0.05	876	0	999	33	147	74	1.71646e-08
ENSG00000104946	TBC1D17	chr19	+	50386229	50386333	50386020	50386149	50386907	50387002	177	0	234	18	147	74	3.34196e-05	0.000401525	1	0.867	0.133	177	0	290	17	147	74	0.00024191	0.00256526	1	0.896	0.104	177	0	130	13	147	74	1.29818e-05	0.0001929	1	0.834	0.166	177	0	222	16	147	74	6.983e-05
ENSG00000170889	RPS9	chr19	+	54710420	54710592	54710143	54710330	54711265	54711390	1412	66	172	312	147	74	0	0	0.915	0.217	0.698	1412	66	1681	168	147	74	1.33466e-07	2.96596e-06	0.915	0.834	0.081	1412	66	1705	190	147	74	5.80133e-10	1.77333e-08	0.915	0.819	0.096	1412	66	914	387	147	74	0
ENSG00000115234	SNX17	chr2	+	27595906	27595980	27594135	27594210	27596113	27596178	10	0	11	55	147	74	2.81904e-07	5.23949e-06	1	0.091	0.909	10	0	6	12	147	74	0.000408304	0.00399602	1	0.201	0.799	10	0	3	16	147	74	9.94264e-06	0.000152578	1	0.086	0.914	10	0	3	19	147	74	3.13375e-06
ENSG00000115241	PPM1G	chr2	-	27606232	27606467	27605342	27605472	27606818	27606959	434	0	992	30	147	74	4.22884e-05	0.00049419	1	0.943	0.057	434	0	403	15	147	74	3.98061e-05	0.000535934	1	0.931	0.069	434	0	404	25	147	74	2.9921e-08	7.34431e-07	1	0.891	0.109	434	0	330	9	147	74	0.00130406
ENSG00000116062	MSH6	chr2	+	48033590	48033790	48033342	48033497	48033917	48034084	264	0	453	24	147	74	1.80953e-05	0.00023375	1	0.905	0.095	264	0	298	24	147	74	3.11556e-07	6.55288e-06	1	0.862	0.138	264	0	286	12	147	74	0.000433869	0.00416714	1	0.923	0.077	264	0	325	24	147	74	7.7564e-07
ENSG00000135624	CCT7	chr2	+	73478353	73478560	73477433	73477566	73479767	73480134	991	0	2311	146	147	74	0	0	1	0.888	0.112	991	0	855	50	147	74	8.88178e-16	4.34937e-14	1	0.896	0.104	991	0	733	36	147	74	1.52689e-12	6.03085e-11	1	0.911	0.089	991	0	927	53	147	74	7.77156e-16
ENSG00000196843	ARID5A	chr2	+	97215057	97215196	97213138	97213254	97215489	97215542	262	24	68	20	147	74	0.000675952	0.0055123	0.846	0.631	0.215	262	24	285	62	147	74	0.000443173	0.00427068	0.846	0.698	0.148	262	24	285	56	147	74	0.00241451	0.0171915	0.846	0.719	0.127	262	24	142	35	147	74	0.000477257
ENSG00000119147	C2orf40	chr2	+	106690405	106690462	106688299	106688347	106694220	106694356	26	1	6	127	130	74	0	0	0.937	0.026	0.911	26	1	0	15	130	74	1.23358e-10	4.10201e-09	0.937	0	0.937	26	1	0	10	130	74	2.46963e-08	6.1415e-07	0.937	0	0.937	26	1	0	12	130	74	2.56249e-09
ENSG00000186522	2016-09-10	chr2	-	110332157	110332344	110325391	110325553	110342702	110342898	48	0	42	9	147	74	0.000951723	0.0073757	1	0.701	0.299	48	0	39	9	147	74	0.000702511	0.00631717	1	0.686	0.314	48	0	33	7	147	74	0.00162603	0.0124609	1	0.704	0.296	48	0	34	10	147	74	0.000187822
ENSG00000136717	BIN1	chr2	-	127818088	127818216	127816586	127816731	127819690	127819773	49	308	11	293	147	74	2.92783e-06	4.49695e-05	0.074	0.019	0.055	49	308	10	394	147	74	2.74241e-09	7.73443e-08	0.074	0.013	0.061	49	308	0	234	147	74	7.0031e-11	2.38678e-09	0.074	0	0.074	49	308	0	234	147	74	7.0031e-11
ENSG00000136717	BIN1	chr2	-	127818162	127818216	127816586	127816731	127819690	127819773	42	308	11	293	127	74	5.51635e-05	0.000626516	0.074	0.021	0.053	42	308	11	394	127	74	4.21855e-07	8.69853e-06	0.074	0.016	0.058	42	308	0	234	127	74	1.39541e-09	4.07318e-08	0.074	0	0.074	42	308	0	234	127	74	1.39541e-09
ENSG00000136717	BIN1	chr2	-	127818171	127818216	127816586	127816731	127819690	127819773	63	308	23	293	118	74	9.86006e-05	0.00104802	0.114	0.047	0.067	63	308	15	394	118	74	2.39148e-10	7.68554e-09	0.114	0.023	0.091	63	308	0	234	118	74	2.56462e-14	1.14015e-12	0.114	0	0.114	63	308	0	234	118	74	2.56462e-14
ENSG00000138385	SSB	chr2	+	170657461	170657536	170655388	170655486	170661983	170662087	307	0	706	115	147	74	0	0	1	0.756	0.244	307	0	482	41	147	74	2.94574e-09	8.28221e-08	1	0.855	0.145	307	0	309	37	147	74	2.09918e-11	7.58509e-10	1	0.808	0.192	307	0	399	43	147	74	5.11408e-11
ENSG00000115524	SF3B1	chr2	-	198257695	198257910	198256978	198257185	198260779	198261052	654	15	793	54	147	74	7.61146e-05	0.000832533	0.956	0.881	0.075	654	15	1000	95	147	74	6.80413e-09	1.83282e-07	0.956	0.841	0.115	654	15	715	44	147	74	0.000594168	0.00542612	0.956	0.891	0.065	654	15	755	53	147	74	4.93215e-05
ENSG00000013441	CLK1	chr2	-	201719338	201719440	201718625	201718716	201719726	201719803	1534	0	549	46	147	74	0	0	1	0.857	0.143	1534	0	3165	191	147	74	0	0	1	0.893	0.107	1534	0	2358	148	147	74	0	0	1	0.889	0.111	1534	0	1720	87	147	74	0
ENSG00000055044	NOP58	chr2	+	203164701	203164860	203162567	203162629	203164956	203165090	82	171	57	465	147	74	1.44251e-12	4.96822e-11	0.194	0.058	0.136	82	171	126	738	147	74	1.12145e-09	3.32062e-08	0.194	0.079	0.115	82	171	106	408	147	74	0.000451027	0.00429671	0.194	0.116	0.078	82	171	102	557	147	74	3.66952e-08
ENSG00000055044	NOP58	chr2	+	203164808	203164860	203162567	203162629	203164956	203165090	53	171	42	465	125	74	4.76321e-08	9.88595e-07	0.155	0.051	0.104	53	171	93	738	125	74	5.91102e-06	9.69795e-05	0.155	0.069	0.086	53	171	62	408	125	74	0.000725969	0.00640628	0.155	0.083	0.072	53	171	71	557	125	74	1.65138e-05
ENSG00000138443	ABI2	chr2	+	204276007	204276094	204267298	204267457	204281630	204281804	161	37	127	66	147	74	0.000498899	0.00425231	0.687	0.492	0.195	161	37	159	82	147	74	0.000291359	0.00300784	0.687	0.494	0.193	161	37	157	88	147	74	5.28809e-05	0.000673346	0.687	0.473	0.214	161	37	156	67	147	74	0.00689448
ENSG00000079308	TNS1	chr2	-	218677937	218678027	218677090	218677168	218678407	218678539	254	0	113	15	147	74	3.38306e-08	7.17665e-07	1	0.791	0.209	254	0	480	73	147	74	1.39999e-13	5.94408e-12	1	0.768	0.232	254	0	273	25	147	74	9.57899e-08	2.17044e-06	1	0.846	0.154	254	0	510	69	147	74	2.29294e-12
ENSG00000197586	ENTPD6	chr20	+	25199185	25199250	25198137	25198217	25203473	25203614	78	0	414	59	138	74	3.33849e-05	0.000401202	1	0.79	0.21	78	0	182	36	138	74	3.36949e-06	5.8313e-05	1	0.731	0.269	78	0	96	23	138	74	1.75272e-06	3.1608e-05	1	0.691	0.309	78	0	162	26	138	74	3.3637e-05
ENSG00000197586	ENTPD6	chr20	+	25201867	25201969	25198137	25198217	25203473	25203614	72	0	321	59	147	74	7.60679e-06	0.000107428	1	0.733	0.267	72	0	106	36	147	74	3.30989e-08	8.03571e-07	1	0.597	0.403	72	0	64	23	147	74	1.03894e-07	2.33885e-06	1	0.583	0.417	72	0	110	26	147	74	3.06528e-06
ENSG00000149531	FRG1B	chr20	+	29624042	29624092	29623128	29623254	29625872	29625984	14	2	2	36	123	74	2.92637e-09	7.09554e-08	0.808	0.032	0.776	14	2	6	33	123	74	6.1908e-07	1.23366e-05	0.808	0.099	0.709	14	2	2	8	123	74	0.000831383	0.00719333	0.808	0.131	0.677	14	2	6	17	123	74	0.000149038
ENSG00000214078	CPNE1	chr20	-	34220084	34220156	34219881	34219947	34220232	34220307	548	38	847	107	145	74	0.00163772	0.0115806	0.88	0.802	0.078	548	38	571	94	145	74	8.26783e-06	0.000131878	0.88	0.756	0.124	548	38	252	37	145	74	0.00234438	0.0167625	0.88	0.777	0.103	548	38	332	44	145	74	0.00544984
ENSG00000214078	CPNE1	chr20	-	34220084	34220170	34219866	34219947	34220232	34220307	285	38	429	107	147	74	0.00156979	0.0112014	0.791	0.669	0.122	285	38	283	94	147	74	6.91279e-06	0.000112003	0.791	0.602	0.189	285	38	124	37	147	74	0.00178997	0.0134697	0.791	0.628	0.163	285	38	165	44	147	74	0.00434741
ENSG00000131051	RBM39	chr20	-	34317233	34317284	34312959	34313077	34317383	34317449	493	0	709	90	124	74	0	0	1	0.825	0.175	493	0	1123	87	124	74	1.36779e-13	5.81643e-12	1	0.885	0.115	493	0	568	43	124	74	1.36408e-11	5.01356e-10	1	0.887	0.113	493	0	830	66	124	74	3.23408e-13
ENSG00000124193	SRSF6	chr20	+	42087792	42087957	42087000	42087149	42088410	42088535	79	26	41	222	147	74	0	0	0.605	0.085	0.52	79	26	132	271	147	74	3.77476e-15	1.78446e-13	0.605	0.197	0.408	79	26	104	97	147	74	5.56298e-05	0.000705065	0.605	0.351	0.254	79	26	87	195	147	74	3.33067e-15
ENSG00000124193	SRSF6	chr20	+	42087792	42088060	42087000	42087149	42088410	42088535	247	26	200	222	147	74	0	0	0.827	0.312	0.515	247	26	520	271	147	74	0	0	0.827	0.491	0.336	247	26	340	97	147	74	7.61639e-06	0.000120254	0.827	0.638	0.189	247	26	296	195	147	74	0
ENSG00000124104	SNX21	chr20	+	44468960	44469097	44463671	44463755	44469277	44469729	37	52	4	47	147	74	8.19443e-06	0.000114772	0.264	0.041	0.223	37	52	6	62	147	74	2.17414e-06	3.89597e-05	0.264	0.046	0.218	37	52	1	29	147	74	1.67176e-05	0.000242339	0.264	0.017	0.247	37	52	5	28	147	74	0.00489397
ENSG00000124104	SNX21	chr20	+	44469086	44469097	44463215	44463755	44469277	44469810	30	52	2	47	84	74	6.1101e-06	8.82261e-05	0.337	0.036	0.301	30	52	3	62	84	74	1.05998e-06	2.01099e-05	0.337	0.041	0.296	30	52	1	29	84	74	0.000120507	0.00139021	0.337	0.029	0.308	30	52	1	28	84	74	0.000162628
ENSG00000196562	SULF2	chr20	-	46288142	46288196	46285655	46287136	46288440	46288474	499	0	930	41	127	74	1.02568e-07	2.03259e-06	1	0.93	0.07	499	0	242	17	127	74	2.7569e-08	6.76538e-07	1	0.892	0.108	499	0	380	20	127	74	2.4223e-07	5.09886e-06	1	0.917	0.083	499	0	335	13	127	74	3.27334e-05
ENSG00000124198	ARFGEF2	chr20	+	47639587	47639718	47635420	47635535	47641849	47642018	142	0	267	12	147	74	0.00426487	0.0252072	1	0.918	0.082	142	0	199	19	147	74	2.90003e-05	0.000403528	1	0.841	0.159	142	0	81	6	147	74	0.00171792	0.0130331	1	0.872	0.128	142	0	174	12	147	74	0.000563202
ENSG00000124226	RNF114	chr20	+	48565784	48565892	48562672	48562787	48568612	48570429	890	0	593	36	147	74	1.1513e-13	4.32865e-12	1	0.892	0.108	890	0	1061	41	147	74	2.85412e-10	9.06562e-09	1	0.929	0.071	890	0	794	31	147	74	1.49988e-09	4.35486e-08	1	0.928	0.072	890	0	661	23	147	74	5.92216e-08
ENSG00000092758	COL9A3	chr20	+	61450573	61450639	61448918	61448987	61451280	61451334	433	324	8	594	139	74	0	0	0.416	0.007	0.409	433	324	16	827	139	74	0	0	0.416	0.01	0.406	433	324	4	658	139	74	0	0	0.416	0.003	0.413	433	324	7	983	139	74	0
ENSG00000101150	TPD52L2	chr20	+	62520542	62520591	62514071	62514173	62521202	62522898	420	0	759	34	122	74	1.02433e-06	1.72371e-05	1	0.931	0.069	420	0	357	20	122	74	5.92885e-07	1.18753e-05	1	0.915	0.085	420	0	214	16	122	74	1.03445e-07	2.32995e-06	1	0.89	0.11	420	0	394	21	122	74	8.05757e-07
ENSG00000101152	DNAJC5	chr20	+	62562461	62562535	62562203	62562375	62562817	62567384	61	30	90	90	147	74	0.00754858	0.0396404	0.506	0.335	0.171	61	30	56	75	147	74	0.000359659	0.00358484	0.506	0.273	0.233	61	30	22	47	147	74	1.01335e-05	0.000155264	0.506	0.191	0.315	61	30	50	57	147	74	0.00418595
ENSG00000156261	CCT8	chr21	-	30435672	30435851	30434810	30434877	30437288	30437426	636	0	1236	58	147	74	2.19864e-10	6.11509e-09	1	0.915	0.085	636	0	854	59	147	74	4.68514e-14	2.04487e-12	1	0.879	0.121	636	0	638	39	147	74	1.3589e-11	4.99828e-10	1	0.892	0.108	636	0	756	37	147	74	9.61072e-10
ENSG00000242259	C22orf39	chr22	-	19392985	19393054	19385514	19385610	19393308	19393403	15	5	4	89	142	74	2.02978e-11	6.33465e-10	0.61	0.023	0.587	15	5	2	25	142	74	1.44989e-06	2.68085e-05	0.61	0.04	0.57	15	5	5	15	142	74	0.00174506	0.0131904	0.61	0.148	0.462	15	5	8	19	142	74	0.00231114
ENSG00000099917	MED15	chr22	+	20936897	20937034	20922807	20922918	20937126	20937254	158	0	237	15	147	74	0.000354253	0.00317884	1	0.888	0.112	158	0	312	20	147	74	0.000208233	0.0022568	1	0.887	0.113	158	0	196	19	147	74	1.14674e-05	0.000173382	1	0.839	0.161	158	0	218	11	147	74	0.00186222
ENSG00000099917	MED15	chr22	+	20936948	20937034	20922807	20922918	20937126	20937254	80	0	170	15	147	74	0.00197786	0.0134889	1	0.851	0.149	80	0	232	20	147	74	0.0017111	0.013239	1	0.854	0.146	80	0	142	19	147	74	0.000159158	0.00176335	1	0.79	0.21	80	0	156	11	147	74	0.00656159
ENSG00000185651	UBE2L3	chr22	+	21968845	21968954	21965145	21965332	21975803	21978323	25	0	2	34	147	74	3.21965e-15	1.34469e-13	1	0.029	0.971	25	0	12	28	147	74	1.89588e-09	5.4454e-08	1	0.177	0.823	25	0	18	14	147	74	3.69547e-05	0.000490212	1	0.393	0.607	25	0	13	22	147	74	6.71526e-08
ENSG00000228315	GUSBP11	chr22	-	24029024	24029182	24025911	24026054	24032418	24032678	16	3	14	20	147	74	0.00227378	0.0150667	0.729	0.261	0.468	16	3	6	17	147	74	0.00016907	0.00189869	0.729	0.151	0.578	16	3	12	18	147	74	0.00222383	0.016031	0.729	0.251	0.478	16	3	4	8	147	74	0.00551102
ENSG00000100330	MTMR3	chr22	+	30366964	30367051	30353024	30353077	30374430	30374520	64	0	100	26	147	74	4.24377e-06	6.34757e-05	1	0.659	0.341	64	0	90	39	147	74	7.59774e-09	2.03056e-07	1	0.537	0.463	64	0	74	24	147	74	8.04119e-07	1.53982e-05	1	0.608	0.392	64	0	51	21	147	74	1.63851e-07
ENSG00000100292	HMOX1	chr22	+	35785856	35785956	35782677	35783169	35789460	35790207	8888	207	8742	575	147	74	0	0	0.956	0.884	0.072	8888	207	3930	302	147	74	0	0	0.956	0.868	0.088	8888	207	2716	210	147	74	0	0	0.956	0.867	0.089	8888	207	8826	694	147	74	0
ENSG00000128272	ATF4	chr22	+	39917358	39917676	39916568	39916756	39917777	39918691	783	0	1447	50	147	74	4.71664e-09	1.11806e-07	1	0.936	0.064	783	0	2961	105	147	74	2.38847e-10	7.6812e-09	1	0.934	0.066	783	0	2281	78	147	74	1.18082e-09	3.48608e-08	1	0.936	0.064	783	0	2050	59	147	74	5.86533e-08
ENSG00000198911	SREBF2	chr22	+	42273232	42273425	42271546	42271728	42273945	42274127	457	0	655	43	147	74	3.9981e-10	1.07326e-08	1	0.885	0.115	457	0	929	56	147	74	5.54628e-10	1.71092e-08	1	0.893	0.107	457	0	425	28	147	74	3.84358e-09	1.06149e-07	1	0.884	0.116	457	0	518	30	147	74	1.58094e-08
ENSG00000100227	POLDIP3	chr22	-	42983511	42983578	42979726	42981974	42995703	42995799	216	0	317	17	140	74	0.000139498	0.00142068	1	0.908	0.092	216	0	313	32	140	74	6.63289e-08	1.54046e-06	1	0.838	0.162	216	0	194	23	140	74	4.68433e-08	1.12073e-06	1	0.817	0.183	216	0	232	14	140	74	9.70199e-05
ENSG00000168137	SETD5	chr3	+	9475053	9475246	9471510	9471735	9475528	9475634	110	21	143	56	147	74	0.0100724	0.0496205	0.725	0.562	0.163	110	21	89	55	147	74	3.4659e-05	0.000474052	0.725	0.449	0.276	110	21	60	35	147	74	0.000405876	0.0039346	0.725	0.463	0.262	110	21	62	75	147	74	1.85063e-11
ENSG00000168137	SETD5	chr3	+	9475728	9475865	9475528	9475634	9475960	9476169	34	6	46	51	147	74	2.86664e-05	0.000350375	0.74	0.312	0.428	34	6	47	44	147	74	0.000192316	0.00211168	0.74	0.35	0.39	34	6	50	32	147	74	0.00589768	0.0349192	0.74	0.44	0.3	34	6	30	26	147	74	0.00109311
ENSG00000168137	SETD5	chr3	+	9476273	9476314	9476017	9476169	9476507	9476566	48	61	52	249	114	74	8.50467e-08	1.70731e-06	0.338	0.119	0.219	48	61	45	327	114	74	4.23628e-12	1.62205e-10	0.338	0.082	0.256	48	61	19	191	114	74	1.31339e-12	5.22533e-11	0.338	0.061	0.277	48	61	42	230	114	74	1.09946e-08
ENSG00000168137	SETD5	chr3	+	9476273	9476399	9476017	9476169	9476507	9476566	41	61	53	249	147	74	7.15888e-06	0.000101724	0.253	0.097	0.156	41	61	37	327	147	74	3.49281e-11	1.22565e-09	0.253	0.054	0.199	41	61	18	191	147	74	1.12717e-10	3.75831e-09	0.253	0.045	0.208	41	61	30	230	147	74	3.98961e-09
ENSG00000156983	BRPF1	chr3	+	9785907	9786192	9785261	9785585	9786691	9786839	39	0	88	16	147	74	0.00233266	0.0154147	1	0.735	0.265	39	0	77	22	147	74	0.000167207	0.00188046	1	0.638	0.362	39	0	83	14	147	74	0.00356462	0.0234688	1	0.749	0.251	39	0	71	15	147	74	0.00129221
ENSG00000131373	HACL1	chr3	-	15616483	15616589	15614665	15614749	15621416	15621552	87	0	54	14	147	74	2.17974e-06	3.43399e-05	1	0.66	0.34	87	0	57	11	147	74	3.66268e-05	0.000497354	1	0.723	0.277	87	0	36	7	147	74	0.000166558	0.00183569	1	0.721	0.279	87	0	52	11	147	74	2.14543e-05
ENSG00000033867	SLC4A7	chr3	-	27463112	27463270	27462190	27462278	27465527	27465643	103	0	280	23	147	74	0.000497684	0.004245	1	0.86	0.14	103	0	197	27	147	74	1.05686e-05	0.000164638	1	0.786	0.214	103	0	96	6	147	74	0.00832404	0.0456089	1	0.89	0.11	103	0	223	14	147	74	0.0031503
ENSG00000170248	PDCD6IP	chr3	+	33906734	33906922	33905497	33905621	33907842	33911194	346	0	706	51	147	74	2.82081e-09	6.86248e-08	1	0.875	0.125	346	0	647	44	147	74	1.1816e-08	3.06347e-07	1	0.881	0.119	346	0	283	16	147	74	4.49627e-06	7.49338e-05	1	0.899	0.101	346	0	389	22	147	74	1.33461e-06
ENSG00000068745	IP6K2	chr3	-	48731891	48731958	48730885	48731673	48732522	48732854	23	44	4	37	140	74	0.00308156	0.0193458	0.216	0.054	0.162	23	44	7	140	140	74	3.45507e-08	8.3733e-07	0.216	0.026	0.19	23	44	3	94	140	74	5.05738e-08	1.2018e-06	0.216	0.017	0.199	23	44	1	51	140	74	2.00621e-06
ENSG00000163938	GNL3	chr3	+	52724607	52724736	52723089	52723222	52724960	52725087	366	0	662	33	147	74	8.45959e-07	1.44458e-05	1	0.91	0.09	366	0	550	50	147	74	2.25104e-11	8.09679e-10	1	0.847	0.153	366	0	332	32	147	74	1.19874e-10	3.98345e-09	1	0.839	0.161	366	0	574	46	147	74	3.21695e-10
ENSG00000136068	FLNB	chr3	+	58116467	58116635	58112328	58112489	58118534	58118658	117	0	248	14	147	74	0.00294844	0.0186737	1	0.899	0.101	117	0	522	63	147	74	2.75025e-06	4.84252e-05	1	0.807	0.193	117	0	283	19	147	74	0.000930626	0.00788972	1	0.882	0.118	117	0	302	22	147	74	0.000503292
ENSG00000136068	FLNB	chr3	+	58129199	58129340	58128376	58128479	58131647	58131776	219	0	404	21	147	74	0.000103061	0.00108906	1	0.906	0.094	219	0	854	42	147	74	6.247e-05	0.00079825	1	0.911	0.089	219	0	453	29	147	74	1.03599e-05	0.000158192	1	0.887	0.113	219	0	522	30	147	74	2.54622e-05
ENSG00000136068	FLNB	chr3	+	58135831	58135954	58135576	58135729	58139101	58139368	247	0	426	17	147	74	0.000430363	0.00375258	1	0.927	0.073	247	0	871	32	147	74	0.000343118	0.0034521	1	0.932	0.068	247	0	444	13	147	74	0.00342118	0.0227159	1	0.945	0.055	247	0	514	15	147	74	0.00296562
ENSG00000080822	CLDND1	chr3	-	98236001	98236033	98235620	98235723	98237728	98237839	120	0	63	13	105	74	1.35433e-06	2.22889e-05	1	0.774	0.226	120	0	127	16	105	74	2.34246e-05	0.000334381	1	0.848	0.152	120	0	94	8	105	74	0.00115598	0.0094096	1	0.892	0.108	120	0	62	10	105	74	2.25593e-05
ENSG00000144802	NFKBIZ	chr3	+	101575916	101576027	101574576	101574746	101576135	101576303	1182	0	224	17	147	74	2.85716e-12	9.65739e-11	1	0.869	0.131	1182	0	1663	106	147	74	0	0	1	0.888	0.112	1182	0	596	44	147	74	0	0	1	0.872	0.128	1182	0	406	32	147	74	0
ENSG00000114023	FAM162A	chr3	+	122121606	122121729	122103044	122103146	122126127	122126811	1094	0	147	17	147	74	1.64313e-14	6.56607e-13	1	0.813	0.187	1094	0	1426	171	147	74	0	0	1	0.808	0.192	1094	0	959	100	147	74	0	0	1	0.828	0.172	1094	0	1058	128	147	74	0
ENSG00000163870	TPRA1	chr3	-	127295663	127295736	127295459	127295539	127295832	127295919	247	0	439	20	146	74	0.000136115	0.00139011	1	0.918	0.082	247	0	321	9	146	74	0.00658527	0.0390193	1	0.948	0.052	247	0	235	7	146	74	0.00740878	0.0416751	1	0.944	0.056	247	0	241	15	146	74	2.70355e-05
ENSG00000240682	ISY1	chr3	-	128852916	128853038	128849392	128849479	128853674	128853797	149	0	326	21	147	74	0.000269972	0.00251789	1	0.887	0.113	149	0	225	17	147	74	0.000134022	0.00155299	1	0.869	0.131	149	0	151	7	147	74	0.00610655	0.0358753	1	0.916	0.084	149	0	232	16	147	74	0.000264661
ENSG00000163655	GMPS	chr3	+	155623948	155624052	155621651	155621749	155628480	155628674	274	4	373	25	147	74	0.00121823	0.00906013	0.972	0.883	0.089	274	4	181	17	147	74	0.000189204	0.00208281	0.972	0.843	0.129	274	4	222	15	147	74	0.00312633	0.0211461	0.972	0.882	0.09	274	4	262	23	147	74	0.000132311
ENSG00000186432	KPNA4	chr3	-	160227587	160227659	160225894	160226057	160231864	160231969	180	0	357	64	145	74	1.44066e-11	4.56897e-10	1	0.74	0.26	180	0	303	45	145	74	1.39784e-09	4.08583e-08	1	0.775	0.225	180	0	247	37	145	74	2.74738e-09	7.78408e-08	1	0.773	0.227	180	0	255	47	145	74	3.67287e-11
ENSG00000061938	TNK2	chr3	-	195608921	195609199	195605919	195606046	195610027	195610180	134	0	165	9	147	74	0.00332535	0.0205791	1	0.902	0.098	134	0	245	10	147	74	0.00900117	0.0496688	1	0.925	0.075	134	0	144	8	147	74	0.00365213	0.0239265	1	0.901	0.099	134	0	149	11	147	74	0.000616388
ENSG00000061938	TNK2	chr3	-	195609156	195609199	195605992	195606046	195610027	195610180	50	0	59	9	116	74	0.00290131	0.0184326	1	0.807	0.193	50	0	88	10	116	74	0.00735033	0.0425143	1	0.849	0.151	50	0	46	8	116	74	0.00213552	0.0155011	1	0.786	0.214	50	0	55	11	116	74	0.000703232
ENSG00000072274	TFRC	chr3	-	195778844	195779055	195754053	195754131	195780288	195780429	199	0	210	15	147	74	4.08404e-05	0.000479472	1	0.876	0.124	199	0	467	21	147	74	0.000489924	0.00464093	1	0.918	0.082	199	0	408	29	147	74	9.0776e-06	0.000141063	1	0.876	0.124	199	0	442	23	147	74	0.000164703
ENSG00000072274	TFRC	chr3	-	195800800	195800996	195798873	195799023	195803934	195803993	183	0	296	25	147	74	5.43524e-06	7.93601e-05	1	0.856	0.144	183	0	496	16	147	74	0.00546018	0.0336643	1	0.94	0.06	183	0	428	48	147	74	4.68116e-08	1.12052e-06	1	0.818	0.182	183	0	526	42	147	74	3.28259e-06
ENSG00000072274	TFRC	chr3	-	195802029	195802231	195798873	195799023	195803934	195803993	178	0	227	25	147	74	5.5027e-07	9.72966e-06	1	0.82	0.18	178	0	351	16	147	74	0.00111601	0.0092738	1	0.917	0.083	178	0	345	48	147	74	3.43499e-09	9.56703e-08	1	0.783	0.217	178	0	357	42	147	74	5.1791e-08
ENSG00000168214	RBPJ	chr4	+	26364067	26364250	26322408	26322437	26387974	26388013	28	7	53	43	147	74	0.00854627	0.0436533	0.668	0.383	0.285	28	7	61	99	147	74	5.63194e-06	9.28471e-05	0.668	0.237	0.431	28	7	60	65	147	74	0.00060369	0.00550389	0.668	0.317	0.351	28	7	57	65	147	74	0.000387273
ENSG00000168214	RBPJ	chr4	+	26431519	26431675	26430341	26430482	26432040	26432144	233	0	261	21	147	74	1.66472e-06	2.68669e-05	1	0.862	0.138	233	0	546	37	147	74	2.04388e-06	3.67946e-05	1	0.881	0.119	233	0	275	8	147	74	0.00777171	0.0431934	1	0.945	0.055	233	0	386	33	147	74	2.01916e-07
ENSG00000121892	PDS5A	chr4	-	39839475	39839828	39824482	39827108	39843567	39843676	150	0	405	41	147	74	2.25323e-06	3.53771e-05	1	0.833	0.167	150	0	205	17	147	74	6.89567e-05	0.000868915	1	0.859	0.141	150	0	182	18	147	74	1.68674e-05	0.00024433	1	0.836	0.164	150	0	209	11	147	74	0.00189935
ENSG00000109180	OCIAD1	chr4	+	48834636	48834699	48833243	48833266	48844652	48844706	241	7	392	40	136	74	0.000758345	0.00607703	0.949	0.842	0.107	241	7	225	23	136	74	0.00223104	0.0163843	0.949	0.842	0.107	241	7	209	29	136	74	5.66551e-05	0.00071548	0.949	0.797	0.152	241	7	201	19	136	74	0.00604263
ENSG00000145216	FIP1L1	chr4	+	54248444	54248502	54245391	54245431	54249939	54250043	155	0	373	18	131	74	0.00151654	0.010884	1	0.921	0.079	155	0	225	17	131	74	0.00011199	0.00132699	1	0.882	0.118	155	0	154	13	131	74	9.94014e-05	0.00117369	1	0.87	0.13	155	0	210	21	131	74	8.49919e-06
ENSG00000174780	SRP72	chr4	+	57349304	57349436	57344757	57344815	57350901	57351030	205	0	377	28	147	74	5.00116e-06	7.36564e-05	1	0.871	0.129	205	0	340	16	147	74	0.000458473	0.00439485	1	0.915	0.085	205	0	206	13	147	74	0.000112985	0.0013139	1	0.889	0.111	205	0	289	12	147	74	0.00141935
ENSG00000138760	SCARB2	chr4	-	77097589	77097681	77096943	77097063	77100669	77100706	457	0	846	61	147	74	1.2686e-11	4.04106e-10	1	0.875	0.125	457	0	653	47	147	74	4.95162e-11	1.71768e-09	1	0.875	0.125	457	0	603	44	147	74	5.55274e-11	1.91905e-09	1	0.873	0.127	457	0	454	42	147	74	8.43436e-13
ENSG00000138674	SEC31A	chr4	-	83769956	83770156	83765563	83765662	83772583	83772757	286	0	528	31	147	74	1.86064e-06	2.97084e-05	1	0.896	0.104	286	0	388	25	147	74	1.29267e-06	2.42297e-05	1	0.887	0.113	286	0	311	17	147	74	1.86906e-05	0.000267707	1	0.902	0.098	286	0	354	15	147	74	0.000166846
ENSG00000138674	SEC31A	chr4	-	83791477	83791577	83788307	83788469	83793096	83793239	497	0	1081	77	147	74	1.00409e-12	3.50328e-11	1	0.876	0.124	497	0	876	82	147	74	6.66134e-16	3.29453e-14	1	0.843	0.157	497	0	732	43	147	74	7.31555e-10	2.2047e-08	1	0.896	0.104	497	0	700	56	147	74	4.30211e-13
ENSG00000118785	SPP1	chr4	+	88901544	88901586	88901197	88901278	88902626	88902950	1043	161	2212	532	115	74	3.1643e-06	4.82808e-05	0.807	0.728	0.079	1043	161	719	214	115	74	9.8973e-09	2.59559e-07	0.807	0.684	0.123	1043	161	193	112	115	74	0	0	0.807	0.526	0.281	1043	161	293	101	115	74	4.30993e-08
ENSG00000164024	METAP1	chr4	+	99969883	99970027	99966329	99966461	99978903	99978969	149	0	271	25	147	74	1.45115e-05	0.000191096	1	0.845	0.155	149	0	213	12	147	74	0.00125139	0.0102041	1	0.899	0.101	149	0	212	17	147	74	9.04491e-05	0.00107886	1	0.863	0.137	149	0	215	10	147	74	0.00378056
ENSG00000164024	METAP1	chr4	+	99969888	99970027	99966329	99966461	99978903	99978969	76	0	121	25	147	74	6.26136e-06	9.01289e-05	1	0.709	0.291	76	0	85	12	147	74	0.000357366	0.0035672	1	0.781	0.219	76	0	84	17	147	74	1.8956e-05	0.000271164	1	0.713	0.287	76	0	96	10	147	74	0.00195405
ENSG00000138801	PAPSS1	chr4	-	108578051	108578163	108575850	108576056	108581114	108581228	355	0	1319	66	147	74	2.45173e-07	4.59541e-06	1	0.91	0.09	355	0	247	25	147	74	5.01121e-10	1.54936e-08	1	0.833	0.167	355	0	220	18	147	74	5.86598e-08	1.38261e-06	1	0.86	0.14	355	0	270	17	147	74	1.08388e-06
ENSG00000129116	PALLD	chr4	+	169815729	169815828	169812072	169812208	169824907	169825057	246	2	156	13	147	74	0.000205939	0.00199583	0.984	0.858	0.126	246	2	274	18	147	74	0.00047346	0.00450923	0.984	0.885	0.099	246	2	264	12	147	74	0.00920861	0.0492922	0.984	0.917	0.067	246	2	193	15	147	74	0.000217738
ENSG00000129116	PALLD	chr4	+	169819643	169819865	169812072	169812208	169824907	169825057	197	2	130	13	147	74	0.000291765	0.00268781	0.98	0.834	0.146	197	2	162	18	147	74	4.58329e-05	0.000608146	0.98	0.819	0.161	197	2	174	12	147	74	0.00343964	0.0228015	0.98	0.88	0.1	197	2	135	15	147	74	8.55078e-05
ENSG00000073578	SDHA	chr5	+	230990	231115	227723	228448	233591	233760	331	0	245	9	147	74	0.000689534	0.0056006	1	0.932	0.068	331	0	324	23	147	74	1.51332e-07	3.32912e-06	1	0.876	0.124	331	0	176	6	147	74	0.00279206	0.0192936	1	0.937	0.063	331	0	195	14	147	74	1.46408e-06
ENSG00000112941	PAPD7	chr5	+	6752985	6753150	6751151	6751310	6754863	6755599	192	0	344	30	147	74	1.63632e-06	2.64391e-05	1	0.852	0.148	192	0	784	62	147	74	1.22463e-06	2.30595e-05	1	0.864	0.136	192	0	430	36	147	74	1.64399e-06	2.98111e-05	1	0.857	0.143	192	0	433	41	147	74	3.12796e-07
ENSG00000038382	TRIO	chr5	+	14507230	14507369	14504501	14504702	14507988	14510312	404	0	874	35	147	74	3.2999e-06	5.01992e-05	1	0.926	0.074	404	0	437	18	147	74	1.51888e-05	0.000227585	1	0.924	0.076	404	0	186	12	147	74	2.05425e-06	3.66163e-05	1	0.886	0.114	404	0	471	16	147	74	9.99414e-05
ENSG00000154122	ANKH	chr5	-	14749280	14749415	14745978	14746071	14751177	14751348	369	0	2671	208	147	74	5.68656e-12	1.8687e-10	1	0.866	0.134	369	0	700	43	147	74	2.36299e-08	5.84867e-07	1	0.891	0.109	369	0	531	44	147	74	1.97732e-10	6.40599e-09	1	0.859	0.141	369	0	623	56	147	74	1.34573e-11
ENSG00000154122	ANKH	chr5	-	14755969	14756053	14751177	14751348	14758588	14758707	306	0	2744	86	147	74	0.000144075	0.00146085	1	0.941	0.059	306	0	713	23	147	74	0.000354166	0.00354043	1	0.94	0.06	306	0	484	16	147	74	0.00052112	0.00485543	1	0.938	0.062	306	0	653	19	147	74	0.00090067
ENSG00000113384	GOLPH3	chr5	-	32143854	32143986	32135677	32135792	32173915	32174456	327	0	696	26	147	74	6.30068e-05	0.000704585	1	0.931	0.069	327	0	571	17	147	74	0.000662841	0.00601892	1	0.944	0.056	327	0	396	24	147	74	7.995e-07	1.53159e-05	1	0.893	0.107	327	0	512	24	147	74	1.013e-05
ENSG00000134352	IL6ST	chr5	-	55259973	55260140	55259179	55259334	55264103	55264224	225	0	955	55	147	74	8.54929e-06	0.000119053	1	0.897	0.103	225	0	406	25	147	74	1.5824e-05	0.000236003	1	0.891	0.109	225	0	271	19	147	74	1.0283e-05	0.000157212	1	0.878	0.122	225	0	419	27	147	74	8.97542e-06
ENSG00000134058	CDK7	chr5	+	68568718	68568868	68565033	68565120	68572369	68572517	120	0	113	9	147	74	0.00103384	0.00792515	1	0.863	0.137	120	0	204	26	147	74	5.46571e-06	9.05963e-05	1	0.798	0.202	120	0	144	18	147	74	1.57123e-05	0.00022898	1	0.801	0.199	120	0	216	14	147	74	0.00138213
ENSG00000171530	TBCA	chr5	-	76989090	76989177	76987091	76987323	77004066	77004172	665	1	1246	65	147	74	4.51e-11	1.34638e-09	0.997	0.906	0.091	665	1	718	31	147	74	4.66906e-08	1.10601e-06	0.997	0.921	0.076	665	1	667	33	147	74	4.39517e-09	1.20169e-07	0.997	0.911	0.086	665	1	593	24	147	74	3.82861e-07
ENSG00000171530	TBCA	chr5	-	76989090	76989192	76987091	76987323	77004066	77004172	509	1	870	65	147	74	4.53937e-12	1.50927e-10	0.996	0.871	0.125	509	1	495	31	147	74	7.00176e-09	1.88234e-07	0.996	0.889	0.107	509	1	480	33	147	74	1.16324e-09	3.43915e-08	0.996	0.88	0.116	509	1	400	24	147	74	5.32872e-08
ENSG00000164292	RHOBTB3	chr5	+	95072592	95072779	95067562	95067788	95084036	95084191	300	0	1302	50	147	74	3.91322e-05	0.000461655	1	0.929	0.071	300	0	539	24	147	74	3.08141e-05	0.000426377	1	0.919	0.081	300	0	271	9	147	74	0.0016375	0.0125293	1	0.938	0.062	300	0	445	18	147	74	0.000118662
ENSG00000145730	PAM	chr5	+	102309819	102310140	102296861	102296933	102325975	102326105	646	53	1057	241	147	74	5.09293e-12	1.6867e-10	0.86	0.688	0.172	646	53	617	128	147	74	2.48391e-08	6.13128e-07	0.86	0.708	0.152	646	53	549	110	147	74	2.12278e-07	4.51667e-06	0.86	0.715	0.145	646	53	553	78	147	74	0.00358445
ENSG00000151292	CSNK1G3	chr5	+	122893188	122893258	122847792	122848264	122909086	122909235	55	0	100	21	143	74	0.000105224	0.00110846	1	0.711	0.289	55	0	139	23	143	74	0.000391151	0.00385301	1	0.758	0.242	55	0	79	14	143	74	0.000516438	0.00481819	1	0.745	0.255	55	0	136	33	143	74	1.90031e-05
ENSG00000164902	PHAX	chr5	+	125944055	125944176	125939261	125939875	125952941	125953025	93	0	290	31	147	74	0.000131192	0.00134632	1	0.825	0.175	93	0	321	29	147	74	0.000420768	0.00409306	1	0.848	0.152	93	0	217	12	147	74	0.00870031	0.047208	1	0.901	0.099	93	0	235	20	147	74	0.000835035
ENSG00000138829	FBN2	chr5	-	127622999	127623122	127622409	127622541	127624129	127624270	468	0	1438	51	147	74	1.49808e-06	2.44176e-05	1	0.934	0.066	468	0	374	14	147	74	3.1331e-05	0.000432543	1	0.931	0.069	468	0	296	9	147	74	0.000562227	0.00517767	1	0.943	0.057	468	0	268	12	147	74	1.47932e-05
ENSG00000171720	HDAC3	chr5	-	141014377	141014520	141009610	141009692	141016114	141016197	215	1	220	28	147	74	1.01195e-07	2.00693e-06	0.991	0.798	0.193	215	1	405	30	147	74	2.89152e-05	0.00040255	0.991	0.872	0.119	215	1	257	15	147	74	0.000716092	0.00633389	0.991	0.896	0.095	215	1	239	19	147	74	4.57034e-05
ENSG00000171720	HDAC3	chr5	-	141014377	141014607	141009426	141009692	141016114	141016197	126	1	112	28	147	74	3.37168e-08	7.1555e-07	0.984	0.668	0.316	126	1	225	30	147	74	2.30067e-05	0.000329017	0.984	0.791	0.193	126	1	149	15	147	74	0.000777007	0.00680057	0.984	0.833	0.151	126	1	138	19	147	74	5.22401e-05
ENSG00000145817	YIPF5	chr5	-	143549409	143549529	143544995	143545168	143550098	143550223	232	0	744	36	147	74	5.46633e-05	0.000621391	1	0.912	0.088	232	0	411	19	147	74	0.000194851	0.00213422	1	0.916	0.084	232	0	247	9	147	74	0.00259311	0.0181946	1	0.933	0.067	232	0	439	31	147	74	2.04798e-06
ENSG00000164587	RPS14	chr5	-	149827036	149827146	149826364	149826526	149827236	149827298	125	3	20	13	147	74	3.85273e-08	8.1054e-07	0.954	0.436	0.518	125	3	100	17	147	74	0.000373202	0.00369889	0.954	0.748	0.206	125	3	205	21	147	74	0.00801105	0.0441595	0.954	0.831	0.123	125	3	40	10	147	74	0.000186508
ENSG00000111845	PAK1IP1	chr6	+	10697556	10697719	10694927	10695302	10702601	10702722	81	0	325	23	147	74	0.00370471	0.0224837	1	0.877	0.123	81	0	158	13	147	74	0.00292755	0.0204565	1	0.86	0.14	81	0	144	11	147	74	0.00464507	0.0288822	1	0.868	0.132	81	0	197	18	147	74	0.00132263
ENSG00000007944	MYLIP	chr6	+	16130787	16130978	16129355	16129640	16141855	16142041	88	0	138	16	147	74	0.000270616	0.00252175	1	0.813	0.187	88	0	372	39	147	74	0.000180945	0.00201094	1	0.828	0.172	88	0	360	42	147	74	7.85409e-05	0.000952282	1	0.812	0.188	88	0	193	21	147	74	0.000266685
ENSG00000204469	PRRC2A	chr6	+	31590503	31590678	31588496	31588635	31592037	31592137	91	0	204	32	147	74	7.44606e-06	0.000105422	1	0.762	0.238	91	0	170	17	147	74	0.000469608	0.00447801	1	0.834	0.166	91	0	107	10	147	74	0.00141731	0.0111211	1	0.843	0.157	91	0	155	28	147	74	2.79943e-06
ENSG00000204469	PRRC2A	chr6	+	31591508	31591686	31588496	31588635	31592037	31592137	182	0	496	32	147	74	3.75641e-05	0.000445221	1	0.886	0.114	182	0	319	17	147	74	0.000373536	0.00370153	1	0.904	0.096	182	0	236	10	147	74	0.00269809	0.0187681	1	0.922	0.078	182	0	259	28	147	74	3.66153e-07
ENSG00000204469	PRRC2A	chr6	+	31594548	31594639	31593796	31593939	31594758	31594975	291	0	762	20	147	74	0.0019836	0.0135154	1	0.95	0.05	291	0	503	21	147	74	8.33938e-05	0.00102461	1	0.923	0.077	291	0	372	21	147	74	6.73148e-06	0.00010791	1	0.899	0.101	291	0	421	20	147	74	3.33877e-05
ENSG00000204469	PRRC2A	chr6	+	31604509	31604727	31604286	31604385	31604818	31604913	229	0	337	12	147	74	0.00194333	0.0132891	1	0.934	0.066	229	0	308	27	147	74	3.5041e-07	7.30258e-06	1	0.852	0.148	229	0	200	16	147	74	5.26015e-06	8.62335e-05	1	0.863	0.137	229	0	187	37	147	74	6.11511e-13
ENSG00000243649	CFB	chr6	+	31918395	31918549	31918062	31918180	31918920	31919021	1253	23	212	27	147	74	2.35256e-10	6.52178e-09	0.965	0.798	0.167	1253	23	136	26	147	74	2.16493e-13	9.065e-12	0.965	0.725	0.24	1253	23	58	13	147	74	7.95168e-09	2.09943e-07	0.965	0.692	0.273	1253	23	35	8	147	74	3.39829e-06
ENSG00000204351	SKIV2L	chr6	+	31928972	31929163	31928817	31928871	31929323	31929452	76	0	163	16	147	74	0.00144118	0.010436	1	0.837	0.163	76	0	68	6	147	74	0.00717333	0.0417082	1	0.851	0.149	76	0	45	8	147	74	0.00030803	0.00311345	1	0.739	0.261	76	0	62	10	147	74	0.000271996
ENSG00000204248	COL11A2	chr6	-	33136499	33136503	33136295	33136349	33136731	33136785	497	0	0	860	77	74	0	0	1	0	1	497	0	0	1146	77	74	0	0	1	0	1	497	0	0	656	77	74	0	0	1	0	1	497	0	0	915	77	74	0
ENSG00000204248	COL11A2	chr6	-	33136499	33136536	33136295	33136349	33136731	33136785	10028	0	12913	860	110	74	0	0	1	0.91	0.09	10028	0	13305	1146	110	74	0	0	1	0.886	0.114	10028	0	8774	656	110	74	0	0	1	0.9	0.1	10028	0	12336	915	110	74	0
ENSG00000204248	COL11A2	chr6	-	33137211	33137305	33136739	33136785	33137607	33137661	802	0	4	130	147	74	0	0	1	0.015	0.985	802	0	1	200	147	74	0	0	1	0.003	0.997	802	0	0	110	147	74	0	0	1	0	1	802	0	0	130	147	74	0
ENSG00000204248	COL11A2	chr6	-	33138102	33138156	33137823	33137877	33138333	33138387	20335	0	25071	1084	127	74	0	0	1	0.931	0.069	20335	0	26332	1251	127	74	0	0	1	0.925	0.075	20335	0	18242	952	127	74	0	0	1	0.918	0.082	20335	0	24991	1263	127	74	0
ENSG00000112511	PHF1	chr6	+	33382731	33382921	33382512	33382606	33383011	33383106	405	0	159	15	147	74	1.43107e-08	3.16929e-07	1	0.842	0.158	405	0	378	37	147	74	6.59461e-12	2.48155e-10	1	0.837	0.163	405	0	339	41	147	74	4.79616e-14	2.07415e-12	1	0.806	0.194	405	0	242	19	147	74	1.81866e-08
ENSG00000112511	PHF1	chr6	+	33382742	33382921	33382501	33382606	33383011	33383106	407	0	149	15	147	74	7.03419e-09	1.62354e-07	1	0.833	0.167	407	0	406	37	147	74	2.14717e-11	7.73846e-10	1	0.847	0.153	407	0	306	41	147	74	5.10703e-15	2.34895e-13	1	0.79	0.21	407	0	220	19	147	74	5.7578e-09
ENSG00000112511	PHF1	chr6	+	33382747	33382921	33382501	33382606	33383011	33383106	313	0	96	15	147	74	8.9761e-10	2.31784e-08	1	0.763	0.237	313	0	273	37	147	74	1.72407e-12	6.83133e-11	1	0.788	0.212	313	0	210	41	147	74	4.44089e-16	2.15324e-14	1	0.721	0.279	313	0	143	19	147	74	6.2012e-10
ENSG00000112715	VEGFA	chr6	+	43748476	43748540	43746625	43746655	43749692	43749824	948	839	152	187	137	74	0.00565985	0.0316322	0.379	0.305	0.074	948	839	1234	2431	137	74	0	0	0.379	0.215	0.164	948	839	926	1803	137	74	0	0	0.379	0.217	0.162	948	839	1304	1779	137	74	4.39426e-13
ENSG00000112701	SENP6	chr6	+	76331247	76331341	76311642	76312292	76333615	76333676	109	0	311	33	147	74	3.83101e-05	0.000453113	1	0.826	0.174	109	0	121	22	147	74	8.95809e-07	1.72347e-05	1	0.735	0.265	109	0	93	11	147	74	0.000150654	0.00168315	1	0.81	0.19	109	0	132	21	147	74	3.3463e-06
ENSG00000135318	NT5E	chr6	+	86201694	86201895	86199211	86199317	86203558	86205500	259	0	1154	161	147	74	3.15303e-14	1.23097e-12	1	0.783	0.217	259	0	196	27	147	74	2.80456e-10	8.91858e-09	1	0.785	0.215	259	0	102	15	147	74	1.04967e-08	2.74051e-07	1	0.774	0.226	259	0	178	26	147	74	1.62371e-10
ENSG00000203875	SNHG5	chr6	-	86387508	86387560	86387141	86387210	86387671	86387750	101	421	2	90	125	74	1.87601e-06	2.99349e-05	0.124	0.013	0.111	101	421	13	683	125	74	0	0	0.124	0.011	0.113	101	421	6	705	125	74	0	0	0.124	0.005	0.119	101	421	3	293	125	74	0
ENSG00000112159	MDN1	chr6	-	90366094	90366293	90365482	90365687	90366418	90366520	14	11	1	108	147	74	1.26864e-11	4.04106e-10	0.391	0.005	0.386	14	11	10	65	147	74	4.88268e-05	0.000643138	0.391	0.072	0.319	14	11	7	25	147	74	0.0090841	0.0487583	0.391	0.124	0.267	14	11	7	50	147	74	6.43538e-05
ENSG00000197594	ENPP1	chr6	+	132168915	132168988	132129173	132129415	132171129	132171246	209	0	1574	83	146	74	2.86324e-05	0.000350043	1	0.906	0.094	209	0	613	50	146	74	4.54111e-07	9.28948e-06	1	0.861	0.139	209	0	440	26	146	74	3.70458e-05	0.000491289	1	0.896	0.104	209	0	546	24	146	74	0.00036889
ENSG00000112339	HBS1L	chr6	-	135363138	135363264	135360710	135360905	135371719	135371785	110	0	284	25	147	74	0.000195592	0.00190864	1	0.851	0.149	110	0	274	14	147	74	0.00575046	0.035066	1	0.908	0.092	110	0	154	10	147	74	0.00300563	0.0204704	1	0.886	0.114	110	0	222	15	147	74	0.0015677
ENSG00000029363	BCLAF1	chr6	-	136588166	136588313	136582402	136582615	136589299	136589477	429	27	801	226	147	74	2.22045e-16	1.00225e-14	0.889	0.641	0.248	429	27	1108	309	147	74	0	0	0.889	0.644	0.245	429	27	703	190	147	74	8.21565e-15	3.75767e-13	0.889	0.651	0.238	429	27	876	230	147	74	7.10543e-15
ENSG00000118495	PLAGL1	chr6	-	144269121	144269597	144261438	144263800	144285923	144285955	169	0	206	17	147	74	3.16585e-05	0.000383262	1	0.859	0.141	169	0	409	23	147	74	0.000269791	0.00281607	1	0.9	0.1	169	0	249	10	147	74	0.00443105	0.0278221	1	0.926	0.074	169	0	227	13	147	74	0.000560021
ENSG00000118495	PLAGL1	chr6	-	144281605	144281679	144263268	144263800	144285923	144285955	164	0	221	17	147	74	6.4084e-05	0.000714902	1	0.867	0.133	164	0	344	23	147	74	9.92794e-05	0.00119743	1	0.883	0.117	164	0	293	10	147	74	0.00927109	0.0495458	1	0.937	0.063	164	0	186	13	147	74	0.000211107
ENSG00000118495	PLAGL1	chr6	-	144281609	144281679	144261436	144263800	144285923	144285955	106	0	134	17	143	74	4.08646e-05	0.000479534	1	0.803	0.197	106	0	213	23	143	74	7.04476e-05	0.000885884	1	0.827	0.173	106	0	164	10	143	74	0.00448513	0.0280793	1	0.895	0.105	106	0	129	13	143	74	0.000295437
ENSG00000118495	PLAGL1	chr6	-	144287294	144287349	144285923	144285955	144290043	144290115	40	0	77	11	128	74	0.00711343	0.0377922	1	0.802	0.198	40	0	109	24	128	74	0.000548176	0.00511291	1	0.724	0.276	40	0	64	9	128	74	0.00889302	0.0479629	1	0.804	0.196	40	0	51	12	128	74	0.000928842
ENSG00000105778	AVL9	chr7	+	32615338	32615436	32612810	32613030	32615566	32615684	11	29	2	83	147	74	4.17432e-05	0.000488493	0.16	0.012	0.148	11	29	0	37	147	74	0.000198496	0.00216718	0.16	0	0.16	11	29	0	27	147	74	0.000958996	0.00808567	0.16	0	0.16	11	29	0	69	147	74	5.20954e-06
ENSG00000122545	2016-09-07	chr7	+	35872407	35872510	35840541	35840880	35903161	35903268	80	0	213	27	147	74	0.000139638	0.00142181	1	0.799	0.201	80	0	204	20	147	74	0.00089008	0.00768854	1	0.837	0.163	80	0	130	22	147	74	2.50875e-05	0.000348183	1	0.748	0.252	80	0	102	14	147	74	0.000231597
ENSG00000169919	GUSB	chr7	-	65439905	65440058	65439512	65439691	65441001	65441189	18	0	31	33	147	74	1.22655e-05	0.000163981	1	0.321	0.679	18	0	13	37	147	74	1.11671e-08	2.90628e-07	1	0.15	0.85	18	0	24	52	147	74	2.65513e-08	6.56961e-07	1	0.189	0.811	18	0	18	42	147	74	2.89239e-08
ENSG00000225648	SBDSP1	chr7	+	72301271	72301393	72300234	72300362	72302181	72302378	91	18	71	57	147	74	2.80537e-06	4.3219e-05	0.718	0.385	0.333	91	18	84	83	147	74	9.55976e-09	2.51674e-07	0.718	0.338	0.38	91	18	78	103	147	74	3.58835e-12	1.37644e-10	0.718	0.276	0.442	91	18	77	48	147	74	0.000181938
ENSG00000225648	SBDSP1	chr7	+	72301330	72301393	72300234	72300362	72302181	72302378	66	18	53	57	136	74	1.35084e-05	0.000178828	0.666	0.336	0.33	66	18	53	83	136	74	5.85931e-09	1.59087e-07	0.666	0.258	0.408	66	18	50	103	136	74	6.49258e-12	2.42801e-10	0.666	0.209	0.457	66	18	45	48	136	74	3.04047e-05
ENSG00000225648	SBDSP1	chr7	+	72301335	72301393	72300234	72300362	72302181	72302378	64	18	50	57	131	74	1.05733e-05	0.000144006	0.668	0.331	0.337	64	18	50	83	131	74	4.5765e-09	1.25822e-07	0.668	0.254	0.414	64	18	51	103	131	74	2.51177e-11	8.99012e-10	0.668	0.219	0.449	64	18	42	48	131	74	2.13563e-05
ENSG00000164692	COL1A2	chr7	+	94054428	94054536	94053647	94053755	94054921	94054975	12027	0	5430	159	147	74	0	0	1	0.945	0.055	12027	0	11229	321	147	74	0	0	1	0.946	0.054	12027	0	35212	1148	147	74	0	0	1	0.939	0.061	12027	0	3538	97	147	74	0
ENSG00000087087	SRRT	chr7	+	100485898	100486004	100485662	100485764	100486094	100486277	138	0	428	20	147	74	0.00258827	0.0167455	1	0.915	0.085	138	0	276	19	147	74	0.000322041	0.0032717	1	0.88	0.12	138	0	197	13	147	74	0.000714573	0.00632273	1	0.884	0.116	138	0	141	17	147	74	8.22045e-06
ENSG00000106397	PLOD3	chr7	-	100858369	100858433	100856387	100856485	100859188	100859301	268	0	1277	53	137	74	4.93111e-05	0.00056701	1	0.929	0.071	268	0	692	30	137	74	6.53903e-05	0.0008309	1	0.926	0.074	268	0	558	19	137	74	0.000714476	0.00632273	1	0.941	0.059	268	0	610	19	137	74	0.00123298
ENSG00000135241	PNPLA8	chr7	-	108128202	108128397	108119627	108119823	108131853	108131911	262	0	339	11	147	74	0.00208327	0.0140403	1	0.939	0.061	262	0	376	15	147	74	0.00039229	0.00386074	1	0.927	0.073	262	0	149	12	147	74	6.20052e-06	0.000100181	1	0.862	0.138	262	0	140	19	147	74	3.61398e-09
ENSG00000135241	PNPLA8	chr7	-	108128388	108128397	108119627	108119823	108131853	108131911	36	0	29	11	82	74	0.000207107	0.00200333	1	0.704	0.296	36	0	38	15	82	74	8.25251e-05	0.00101508	1	0.696	0.304	36	0	0	12	82	74	1.31435e-11	4.83802e-10	1	0	1	36	0	0	19	82	74	3.33067e-15
ENSG00000105971	CAV2	chr7	+	116140313	116140414	116139894	116139985	116146024	116146154	339	0	254	23	147	74	6.61718e-09	1.53356e-07	1	0.848	0.152	339	0	208	14	147	74	2.12408e-06	3.81502e-05	1	0.882	0.118	339	0	148	8	147	74	0.000114676	0.00133074	1	0.903	0.097	339	0	231	19	147	74	6.27236e-08
ENSG00000105971	CAV2	chr7	+	116140313	116140501	116139443	116139985	116146024	116148595	751	0	610	23	147	74	9.66755e-08	1.9233e-06	1	0.93	0.07	751	0	417	14	147	74	5.62533e-06	9.2766e-05	1	0.937	0.063	751	0	294	8	147	74	0.00044944	0.00428658	1	0.949	0.051	751	0	549	19	147	74	7.75365e-07
ENSG00000079459	FDFT1	chr8	+	11667175	11667359	11660254	11660440	11679258	11679387	376	0	511	27	147	74	6.19697e-07	1.08741e-05	1	0.905	0.095	376	0	507	25	147	74	1.68885e-06	3.08508e-05	1	0.911	0.089	376	0	312	18	147	74	1.20789e-06	2.23899e-05	1	0.897	0.103	376	0	297	14	147	74	1.89625e-05
ENSG00000079459	FDFT1	chr8	+	11667300	11667359	11660249	11660440	11679258	11679387	365	0	453	27	132	74	2.55155e-07	4.77195e-06	1	0.904	0.096	365	0	441	25	132	74	6.03818e-07	1.20551e-05	1	0.908	0.092	365	0	279	18	132	74	6.30623e-07	1.22718e-05	1	0.897	0.103	365	0	256	14	132	74	8.59685e-06
ENSG00000079459	FDFT1	chr8	+	11687752	11687929	11683532	11683724	11689026	11689179	742	0	1345	56	147	74	2.07951e-10	5.79325e-09	1	0.924	0.076	742	0	1138	52	147	74	4.79986e-11	1.66822e-09	1	0.917	0.083	742	0	795	37	147	74	2.60546e-10	8.33172e-09	1	0.915	0.085	742	0	872	27	147	74	5.72955e-07
ENSG00000168495	POLR3D	chr8	+	22105666	22105791	22105369	22105521	22105993	22106162	439	0	588	18	147	74	0.000103121	0.00108924	1	0.943	0.057	439	0	632	32	147	74	1.12864e-07	2.53495e-06	1	0.909	0.091	439	0	407	27	147	74	7.00057e-09	1.86331e-07	1	0.884	0.116	439	0	427	26	147	74	2.64191e-08
ENSG00000120913	PDLIM2	chr8	+	22446810	22446887	22442833	22442912	22447108	22447254	127	0	7	8	147	74	1.56032e-09	3.90811e-08	1	0.306	0.694	127	0	35	13	147	74	7.60394e-09	2.03123e-07	1	0.575	0.425	127	0	60	4	147	74	0.00771502	0.0429559	1	0.883	0.117	127	0	31	3	147	74	0.00588877
ENSG00000147439	BIN3	chr8	-	22480053	22480210	22479043	22479081	22481427	22481562	40	92	8	239	147	74	1.34337e-13	5.01006e-12	0.18	0.017	0.163	40	92	12	133	147	74	2.08931e-06	3.75504e-05	0.18	0.043	0.137	40	92	6	46	147	74	0.00580916	0.0345363	0.18	0.062	0.118	40	92	22	122	147	74	0.00286527
ENSG00000168615	ADAM9	chr8	+	38940486	38940592	38940159	38940240	38947565	38947707	243	0	558	17	147	74	0.0022238	0.0148108	1	0.943	0.057	243	0	177	16	147	74	1.17241e-06	2.21199e-05	1	0.848	0.152	243	0	197	12	147	74	6.7451e-05	0.000833635	1	0.892	0.108	243	0	80	11	147	74	3.10761e-07
ENSG00000078668	VDAC3	chr8	+	42252601	42252651	42251727	42251796	42256229	42256382	94	0	249	31	123	74	4.08909e-05	0.000479733	1	0.829	0.171	94	0	97	25	123	74	9.35455e-08	2.12643e-06	1	0.7	0.3	94	0	64	18	123	74	1.78836e-07	3.85342e-06	1	0.681	0.319	94	0	111	14	123	74	0.000147546
ENSG00000078668	VDAC3	chr8	+	42252601	42252654	42251727	42251796	42256229	42256382	60	0	161	31	126	74	5.57222e-05	0.000632297	1	0.753	0.247	60	0	59	25	126	74	1.20415e-07	2.69901e-06	1	0.581	0.419	60	0	40	18	126	74	2.96769e-07	6.13663e-06	1	0.566	0.434	60	0	77	14	126	74	0.000272268
ENSG00000198363	ASPH	chr8	-	62556503	62556560	62555944	62555992	62557158	62557191	191	12	525	197	130	74	1.14597e-12	3.97922e-11	0.901	0.603	0.298	191	12	129	26	130	74	0.00105272	0.00881758	0.901	0.739	0.162	191	12	195	45	130	74	3.63572e-05	0.000483721	0.901	0.712	0.189	191	12	78	17	130	74	0.00194458
ENSG00000155096	AZIN1	chr8	-	103862226	103862393	103855935	103855975	103870240	103870378	149	205	113	279	147	74	0.000155074	0.00155688	0.268	0.169	0.099	149	205	188	485	147	74	5.48598e-06	9.08522e-05	0.268	0.163	0.105	149	205	160	324	147	74	0.00769461	0.0428933	0.268	0.199	0.069	149	205	123	329	147	74	1.00096e-05
ENSG00000170961	HAS2	chr8	-	122640953	122641580	122629344	122629446	122653092	122653630	293	4	769	45	147	74	0.000922888	0.0071961	0.974	0.896	0.078	293	4	902	57	147	74	0.000315885	0.00322025	0.974	0.888	0.086	293	4	794	41	147	74	0.00313477	0.0211857	0.974	0.907	0.067	293	4	1146	62	147	74	0.00142564
ENSG00000179950	PUF60	chr8	-	144906482	144906566	144903987	144904083	144911449	144911469	89	0	289	79	147	74	2.62112e-09	6.41348e-08	1	0.648	0.352	89	0	151	26	147	74	6.20621e-06	0.000101426	1	0.745	0.255	89	0	102	21	147	74	2.41074e-06	4.21465e-05	1	0.71	0.29	89	0	108	21	147	74	3.86992e-06
ENSG00000179950	PUF60	chr8	-	144906482	144906569	144903987	144904083	144911449	144911485	103	0	341	79	147	74	2.69902e-09	6.57564e-08	1	0.685	0.315	103	0	184	26	147	74	8.83515e-06	0.000139707	1	0.781	0.219	103	0	116	21	147	74	1.86164e-06	3.3413e-05	1	0.735	0.265	103	0	147	21	147	74	1.2995e-05
ENSG00000107104	KANK1	chr9	+	732377	732617	731157	731266	734747	734835	741	3	654	26	147	74	1.72242e-06	2.77255e-05	0.992	0.927	0.065	741	3	1009	85	147	74	1.11022e-16	5.639e-15	0.992	0.857	0.135	741	3	475	54	147	74	0	0	0.992	0.816	0.176	741	3	1313	181	147	74	0
ENSG00000106993	CDC37L1	chr9	+	4688512	4688606	4684876	4685158	4697095	4697211	334	0	249	15	147	74	4.39462e-06	6.54817e-05	1	0.893	0.107	334	0	294	30	147	74	2.91001e-10	9.22702e-09	1	0.831	0.169	334	0	205	14	147	74	2.09147e-06	3.71722e-05	1	0.881	0.119	334	0	451	30	147	74	9.82802e-08
ENSG00000165280	VCP	chr9	-	35059060	35059216	35057372	35057527	35059489	35059798	1259	0	4103	144	147	74	2.44249e-15	1.03112e-13	1	0.935	0.065	1259	0	1283	45	147	74	5.31564e-12	2.01817e-10	1	0.935	0.065	1259	0	944	31	147	74	4.65993e-10	1.43693e-08	1	0.939	0.061	1259	0	1406	56	147	74	3.68594e-14
ENSG00000137076	TLN1	chr9	-	35699352	35699449	35699028	35699153	35699970	35700078	223	0	353	11	147	74	0.00448862	0.0262727	1	0.942	0.058	223	0	331	10	147	74	0.0057452	0.0350418	1	0.943	0.057	223	0	208	10	147	74	0.000651189	0.00585772	1	0.913	0.087	223	0	302	11	147	74	0.00218911
ENSG00000137076	TLN1	chr9	-	35722857	35722918	35722115	35722220	35723948	35724076	200	0	460	18	134	74	0.00141018	0.0102421	1	0.934	0.066	200	0	296	32	134	74	8.73312e-08	1.99347e-06	1	0.836	0.164	200	0	168	28	134	74	6.37305e-10	1.93966e-08	1	0.768	0.232	200	0	244	27	134	74	1.23414e-07
ENSG00000196739	COL27A1	chr9	+	116967381	116967426	116958238	116958292	116968038	116968092	465	0	1450	88	118	74	1.3177e-10	3.75527e-09	1	0.912	0.088	465	0	843	28	118	74	2.09065e-05	0.00030295	1	0.95	0.05	465	0	560	38	118	74	5.81316e-10	1.77585e-08	1	0.902	0.098	465	0	751	68	118	74	5.07372e-14
ENSG00000041982	TNC	chr9	-	117815018	117815294	117810538	117810811	117819431	117819704	200	188	160	393	147	74	2.42772e-12	8.26076e-11	0.349	0.17	0.179	200	188	50	153	147	74	1.65523e-10	5.41182e-09	0.349	0.141	0.208	200	188	53	119	147	74	4.58827e-06	7.62862e-05	0.349	0.183	0.166	200	188	19	79	147	74	3.76147e-09
ENSG00000167110	GOLGA2	chr9	-	131029472	131029538	131028565	131028604	131029736	131029796	58	118	69	255	139	74	0.00483134	0.0278462	0.207	0.126	0.081	58	118	56	241	139	74	0.000639763	0.00584436	0.207	0.11	0.097	58	118	30	129	139	74	0.00335489	0.0223541	0.207	0.11	0.097	58	118	43	195	139	74	0.000544696
ENSG00000198917	C9orf114	chr9	-	131586025	131586173	131585076	131585112	131586350	131586453	39	0	153	28	147	74	0.00148631	0.0107109	1	0.733	0.267	39	0	27	8	147	74	0.000884161	0.0076483	1	0.629	0.371	39	0	30	6	147	74	0.00552954	0.0331261	1	0.716	0.284	39	0	37	14	147	74	7.87511e-05
ENSG00000136802	LRRC8A	chr9	+	131669435	131671600	131648293	131648400	131678374	131680315	180	0	733	21	147	74	0.00828069	0.0425832	1	0.946	0.054	180	0	266	18	147	74	7.52963e-05	0.000938809	1	0.882	0.118	180	0	204	11	147	74	0.000768516	0.00673584	1	0.903	0.097	180	0	243	9	147	74	0.00564977
ENSG00000126883	NUP214	chr9	+	134077033	134077104	134072602	134074402	134090598	134090755	86	0	199	16	144	74	0.00204456	0.0138528	1	0.865	0.135	86	0	79	9	144	74	0.000926582	0.00794837	1	0.819	0.181	86	0	59	5	144	74	0.00737751	0.041523	1	0.858	0.142	86	0	117	12	144	74	0.000914412
ENSG00000160271	RALGDS	chr9	-	135979137	135979220	135978616	135978649	135979649	135979718	215	0	92	10	147	74	6.41307e-06	9.20002e-05	1	0.822	0.178	215	0	174	6	147	74	0.00786157	0.0446478	1	0.936	0.064	215	0	129	12	147	74	8.03657e-06	0.0001262	1	0.844	0.156	215	0	121	13	147	74	1.92193e-06
ENSG00000102265	TIMP1	chrX	+	47444613	47444730	47444341	47444414	47445919	47446188	439	0	175	74	147	74	0	0	1	0.543	0.457	439	0	176	218	147	74	0	0	1	0.289	0.711	439	0	105	49	147	74	0	0	1	0.519	0.481	439	0	78	221	147	74	0
ENSG00000102265	TIMP1	chrX	+	47444941	47445045	47444341	47444414	47445919	47446188	368	0	0	74	147	74	0	0	1	0	1	368	0	123	218	147	74	0	0	1	0.221	0.779	368	0	8	49	147	74	0	0	1	0.076	0.924	368	0	10	221	147	74	0
ENSG00000184205	TSPYL2	chrX	+	53114135	53114281	53113936	53114048	53114408	53114503	352	0	376	41	147	74	5.13412e-12	1.69924e-10	1	0.822	0.178	352	0	990	73	147	74	4.78295e-10	1.48377e-08	1	0.872	0.128	352	0	546	51	147	74	2.46833e-11	8.8475e-10	1	0.843	0.157	352	0	958	130	147	74	0
ENSG00000184634	MED12	chrX	+	70351399	70351471	70349884	70350064	70351922	70352056	121	0	257	24	145	74	7.13153e-05	0.000786431	1	0.845	0.155	121	0	199	10	145	74	0.00586071	0.0356031	1	0.91	0.09	121	0	77	13	145	74	4.85168e-06	8.01244e-05	1	0.751	0.249	121	0	129	17	145	74	1.16522e-05
ENSG00000147162	OGT	chrX	+	70756027	70756208	70753149	70753186	70757678	70757922	195	0	553	64	147	74	5.83671e-09	1.36261e-07	1	0.813	0.187	195	0	528	59	147	74	1.20435e-08	3.11653e-07	1	0.818	0.182	195	0	300	40	147	74	3.19979e-09	8.96778e-08	1	0.791	0.209	195	0	397	48	147	74	6.82437e-09
ENSG00000147162	OGT	chrX	+	70756057	70756208	70752953	70753186	70757678	70757922	100	0	276	64	147	74	6.93557e-09	1.60224e-07	1	0.685	0.315	100	0	256	59	147	74	9.20777e-09	2.43111e-07	1	0.686	0.314	100	0	147	40	147	74	3.31489e-09	9.25874e-08	1	0.649	0.351	100	0	192	48	147	74	5.41497e-09
ENSG00000102359	SRPX2	chrX	+	99920532	99920654	99920239	99920366	99921750	99921930	471	0	692	38	147	74	7.90729e-09	1.81272e-07	1	0.902	0.098	471	0	443	30	147	74	1.16631e-09	3.43855e-08	1	0.881	0.119	471	0	409	31	147	74	1.67149e-10	5.46581e-09	1	0.869	0.131	471	0	623	36	147	74	4.69233e-09
ENSG00000022267	FHL1	chrX	+	135291401	135291601	135290613	135290800	135292029	135293518	39	0	29	7	147	74	0.00238517	0.0157015	1	0.676	0.324	39	0	44	23	147	74	2.59658e-06	4.58971e-05	1	0.491	0.509	39	0	77	19	147	74	0.000458435	0.00436223	1	0.671	0.329	39	0	26	7	147	74	0.00165307
ENSG00000147403	RPL10	chrX	+	153628754	153628967	153628143	153628282	153629042	153629258	47	74	0	17	147	74	0.000241485	0.00228716	0.242	0	0.242	47	74	0	38	147	74	8.56438e-08	1.95658e-06	0.242	0	0.242	47	74	0	46	147	74	6.09736e-09	1.63707e-07	0.242	0	0.242	47	74	0	35	147	74	2.41903e-07
ENSG00000130827	PLXNA3	chrX	+	153698030	153698127	153697721	153697825	153698319	153698510	55	0	151	15	147	74	0.00609744	0.0335073	1	0.835	0.165	55	0	151	27	147	74	0.000208087	0.00225565	1	0.738	0.262	55	0	115	12	147	74	0.00598077	0.0353078	1	0.828	0.172	55	0	64	12	147	74	0.000508133
[truncated: 4 more columns]

## Sheet: MXE
GeneID	geneSymbol	chr	strand	1stExonStart_0base	1stExonEnd	2ndExonStart_0base	2ndExonEnd	upstreamES	upstreamEE	downstreamES	downstreamEE	IJC_SAMPLE_1 (R08-269A vs. 14 week control)	SJC_SAMPLE_1 (R08-269A vs. 14 week control)	IJC_SAMPLE_2 (R08-269A vs. 14 week control)	SJC_SAMPLE_2 (R08-269A vs. 14 week control)	IncFormLen (R08-269A vs. 14 week control)	SkipFormLen (R08-269A vs. 14 week control)	PValue (R08-269A vs. 14 week control)	FDR (R08-269A vs. 14 week control)	IncLevel1 (R08-269A vs. 14 week control)	IncLevel2 (R08-269A vs. 14 week control)	IncLevelDifference (R08-269A vs. 14 week control)	IJC_SAMPLE_1 (R08-269A vs. 14 week control)	SJC_SAMPLE_1 (R08-269A vs. 14 week control)	IJC_SAMPLE_2 (R08-269A vs. 14 week control)	SJC_SAMPLE_2 (R08-269A vs. 14 week control)	IncFormLen (R08-269A vs. 14 week control)	SkipFormLen (R08-269A vs. 14 week control)	PValue (R08-269A vs. 14 week control)	FDR (R08-269A vs. 14 week control)	IncLevel1 (R08-269A vs. 14 week control)	IncLevel2 (R08-269A vs. 14 week control)	IncLevelDifference (R08-269A vs. 14 week control)	IJC_SAMPLE_1 (R08-269A vs. 15 week control)	SJC_SAMPLE_1 (R08-269A vs. 15 week control)	IJC_SAMPLE_2 (R08-269A vs. 15 week control)	SJC_SAMPLE_2 (R08-269A vs. 15 week control)	IncFormLen (R08-269A vs. 15 week control)	SkipFormLen (R08-269A vs. 15 week control)	PValue (R08-269A vs. 15 week control)	FDR (R08-269A vs. 15 week control)	IncLevel1 (R08-269A vs. 15 week control)	IncLevel2 (R08-269A vs. 15 week control)	IncLevelDifference (R08-269A vs. 15 week control)	IJC_SAMPLE_1 (R08-269A vs. 18 week control)	SJC_SAMPLE_1 (R08-269A vs. 18 week control)	IJC_SAMPLE_2 (R08-269A vs. 18 week control)	SJC_SAMPLE_2 (R08-269A vs. 18 week control)	IncFormLen (R08-269A vs. 18 week control)
ENSG00000125944	HNRNPR	chr1	-	23650048	23650225	23660010	23660124	23648020	23648156	23664246	23664354	76	267	365	639	147	147	7.72603e-07	8.05307e-06	0.222	0.364	-0.142	76	267	194	399	147	147	0.000523812	0.00392556	0.222	0.327	-0.105	76	267	159	265	147	147	3.96284e-06	4.68197e-05	0.222	0.375	-0.153	76	267	243	398	147
ENSG00000084636	COL16A1	chr1	-	32156788	32156827	32157017	32157113	32155967	32155994	32157198	32157243	2464	577	1827	126	147	112	0	0	0.765	0.917	-0.152	2464	577	1477	17	147	112	0	0	0.765	0.985	-0.22	2464	577	2609	15	147	112	0	0	0.765	0.993	-0.228	2464	577	3488	28	147
ENSG00000084636	COL16A1	chr1	-	32163506	32163773	32164083	32164207	32162820	32162901	32165413	32165531	1616	2190	1375	1310	147	147	3.49831e-12	5.17684e-11	0.425	0.512	-0.087	1616	2190	1871	1794	147	147	1.04472e-13	2.14177e-12	0.425	0.511	-0.086	1616	2190	2161	2245	147	147	2.42184e-09	4.02034e-08	0.425	0.49	-0.065	1616	2190	2429	2665	147
ENSG00000090621	PABPC4	chr1	-	40030777	40031050	40033422	40033518	40030357	40030445	40034473	40034611	503	596	757	528	147	147	1.49234e-10	2.04275e-09	0.458	0.589	-0.131	503	596	880	784	147	147	0.000256091	0.00206846	0.458	0.529	-0.071	503	596	740	628	147	147	4.03555e-05	0.000392857	0.458	0.541	-0.083	503	596	789	533	147
ENSG00000060718	COL11A1	chr1	-	103468770	103468824	103470002	103470044	103468302	103468347	103470163	103470217	4872	7298	9989	8146	115	127	0	0	0.424	0.575	-0.151	4872	7298	5814	6620	115	127	0	0	0.424	0.492	-0.068	4872	7298	5657	4249	115	127	0	0	0.424	0.595	-0.171	4872	7298	8107	5854	115
ENSG00000060718	COL11A1	chr1	-	103481223	103481298	103483375	103483438	103480066	103480150	103484373	103484415	3275	5371	8807	10760	136	147	0	0	0.397	0.469	-0.072	3275	5371	7253	8799	136	147	0	0	0.397	0.471	-0.074	3275	5371	5145	6011	136	147	0	0	0.397	0.481	-0.084	3275	5371	6813	7914	136
ENSG00000178104	PDE4DIP	chr1	-	144871695	144871881	144873876	144874029	144867920	144868172	144874680	144874904	47	5	494	0	147	147	0.000213132	0.00161813	0.904	1	-0.096	47	5	83	0	147	147	0.00540873	0.0288073	0.904	1	-0.096	47	5	70	0	147	147	0.0083607	0.0409558	0.904	1	-0.096	47	5	78	0	147
ENSG00000143127	ITGA10	chr1	+	145527927	145528037	145528569	145528684	145527612	145527724	145530266	145530394	428	436	1181	766	147	147	4.3398e-08	5.04936e-07	0.495	0.607	-0.112	428	436	781	563	147	147	8.10787e-05	0.000734043	0.495	0.581	-0.086	428	436	473	311	147	147	1.10952e-05	0.000121111	0.495	0.603	-0.108	428	436	664	458	147
ENSG00000169231	THBS3	chr1	-	155170241	155170401	155170687	155170795	155169785	155169904	155170884	155170995	194	382	121	105	147	147	2.8784e-07	3.10814e-06	0.337	0.535	-0.198	194	382	256	241	147	147	3.62776e-09	5.8134e-08	0.337	0.515	-0.178	194	382	565	530	147	147	2.03737e-12	4.26038e-11	0.337	0.516	-0.179	194	382	245	230	147
ENSG00000143337	TOR1AIP1	chr1	+	179858447	179858504	179869260	179869302	179853826	179853904	179870436	179870522	1	59	209	304	130	115	4.50262e-12	6.62091e-11	0.015	0.378	-0.363	1	59	274	211	130	115	0	0	0.015	0.535	-0.52	1	59	194	130	130	115	0	0	0.015	0.569	-0.554	1	59	287	200	130
ENSG00000116962	NID1	chr1	-	236180447	236180573	236187369	236187513	236156944	236157172	236189195	236189441	154	25	236	15	147	147	0.00559919	0.0276484	0.86	0.94	-0.08	154	25	193	10	147	147	0.0022097	0.0135751	0.86	0.951	-0.091	154	25	206	12	147	147	0.00410576	0.0230949	0.86	0.945	-0.085	154	25	130	0	147
ENSG00000175356	SCUBE2	chr11	-	9072152	9072257	9077339	9077456	9068902	9069109	9080849	9080972	92	10	293	0	147	147	3.53009e-06	3.45511e-05	0.902	1	-0.098	92	10	96	0	147	147	0.00075984	0.00544247	0.902	1	-0.098	92	10	116	0	147	147	0.00032573	0.00257202	0.902	1	-0.098	92	10	98	0	147
ENSG00000134333	LDHA	chr11	+	18422383	18422557	18425284	18425358	18420977	18421095	18426995	18427119	1008	2208	596	1017	147	147	0.000105599	0.000849534	0.313	0.369	-0.056	1008	2208	4442	5223	147	147	0	0	0.313	0.46	-0.147	1008	2208	2222	3848	147	147	3.84265e-07	5.20288e-06	0.313	0.366	-0.053	1008	2208	1796	2810	147
ENSG00000026508	CD44	chr11	+	35211381	35211612	35236398	35236429	35201820	35201954	35240862	35240934	8	10	71	0	147	104	5.55443e-09	6.93969e-08	0.361	1	-0.639	8	10	11	0	147	104	0.00138583	0.00922403	0.361	1	-0.639	8	10	84	0	147	104	1.38227e-09	2.36739e-08	0.361	1	-0.639	8	10	11	0	147
ENSG00000110721	CHKA	chr11	-	67842183	67842297	67848870	67848924	67838190	67838324	67864485	67864597	0	20	41	72	127	147	0.000166375	0.00129267	0	0.397	-0.397	0	20	19	59	127	147	0.0042734	0.0235819	0	0.272	-0.272	0	20	22	53	127	147	0.00137423	0.00908241	0	0.325	-0.325	0	20	15	57	127
ENSG00000149968	MMP3	chr11	-	102709840	102709974	102710838	102710983	102709281	102709441	102711159	102711324	22031	29403	5730	4632	147	147	0	0	0.428	0.553	-0.125	22031	29403	8006	5506	147	147	0	0	0.428	0.593	-0.165	22031	29403	5863	4183	147	147	0	0	0.428	0.584	-0.156	22031	29403	6858	7104	147
ENSG00000139219	COL2A1	chr12	-	48369748	48369853	48370594	48370702	48369099	48369388	48370884	48370938	96012	12027	135067	1	147	147	0	0	0.889	1	-0.111	96012	12027	131876	0	147	147	0	0	0.889	1	-0.111	96012	12027	100582	0	147	147	0	0	0.889	1	-0.111	96012	12027	127044	0	147
ENSG00000139219	COL2A1	chr12	-	48377465	48377492	48377869	48377923	48377167	48377221	48378328	48378382	50469	6530	68896	3226	127	100	0	0	0.859	0.944	-0.085	50469	6530	62291	1955	127	100	0	0	0.859	0.962	-0.103	50469	6530	51780	827	127	100	0	0	0.859	0.98	-0.121	50469	6530	70203	3568	127
ENSG00000139219	COL2A1	chr12	-	48388206	48388260	48389037	48389091	48387776	48387830	48389492	48389546	19514	59395	38746	75973	127	127	0	0	0.247	0.338	-0.091	19514	59395	56898	92736	127	127	0	0	0.247	0.38	-0.133	19514	59395	37654	57645	127	127	0	0	0.247	0.395	-0.148	19514	59395	67783	66339	127
ENSG00000152767	FARP1	chr13	+	99076825	99076904	99083296	99083534	99064154	99064288	99087829	99087960	102	126	229	145	147	147	8.3345e-05	0.0006823	0.447	0.612	-0.165	102	126	237	154	147	147	0.000135054	0.00116613	0.447	0.606	-0.159	102	126	205	108	147	147	1.55643e-06	1.95459e-05	0.447	0.655	-0.208	102	126	209	111	147
ENSG00000119725	ZNF410	chr14	+	74376043	74376133	74387682	74387808	74371604	74371786	74388768	74388909	56	82	174	74	147	147	1.6306e-08	1.98141e-07	0.406	0.702	-0.296	56	82	189	85	147	147	3.66622e-08	5.38948e-07	0.406	0.69	-0.284	56	82	143	104	147	147	0.00114101	0.00775885	0.406	0.579	-0.173	56	82	139	75	147
ENSG00000214548	MEG3	chr14	+	101300968	101301088	101302075	101302216	101295370	101296086	101302503	101302637	43	425	159	489	147	147	1.21051e-11	1.76053e-10	0.092	0.245	-0.153	43	425	728	1535	147	147	0	0	0.092	0.322	-0.23	43	425	344	1328	147	147	1.99657e-09	3.35073e-08	0.092	0.206	-0.114	43	425	360	1051	147
ENSG00000140416	TPM1	chr15	+	63335904	63336030	63336225	63336351	63334956	63335142	63349183	63349317	38	1241	58	472	147	147	8.50165e-11	1.17934e-09	0.03	0.109	-0.079	38	1241	28	154	147	147	4.00679e-10	6.78628e-09	0.03	0.154	-0.124	38	1241	21	187	147	147	2.16493e-05	0.000222554	0.03	0.101	-0.071	38	1241	22	109	147
ENSG00000140416	TPM1	chr15	+	63353396	63353472	63353911	63353978	63353067	63353138	63354413	63354476	167	684	588	56	147	140	0	0	0.189	0.909	-0.72	167	684	177	31	147	140	0	0	0.189	0.845	-0.656	167	684	153	52	147	140	0	0	0.189	0.737	-0.548	167	684	135	14	147
ENSG00000140416	TPM1	chr15	+	63353396	63353472	63353911	63353987	63353067	63353138	63354413	63354476	167	1516	588	154	147	147	0	0	0.099	0.792	-0.693	167	1516	177	109	147	147	0	0	0.099	0.619	-0.52	167	1516	153	161	147	147	0	0	0.099	0.487	-0.388	167	1516	135	62	147
ENSG00000140416	TPM1	chr15	+	63354413	63354476	63354774	63354844	63353911	63353987	63356262	63356341	813	620	88	18	136	143	2.60858e-08	3.10495e-07	0.58	0.837	-0.257	813	620	71	15	136	143	7.77942e-07	9.85542e-06	0.58	0.833	-0.253	813	620	100	24	136	143	6.59561e-08	9.65673e-07	0.58	0.814	-0.234	813	620	45	15	136
ENSG00000166123	GPT2	chr16	+	46931559	46931649	46934593	46934702	46918605	46918870	46940753	46940887	86	152	127	129	147	147	0.00254444	0.0141058	0.361	0.496	-0.135	86	152	268	209	147	147	4.06947e-07	5.28935e-06	0.361	0.562	-0.201	86	152	133	114	147	147	8.94989e-05	0.000813466	0.361	0.538	-0.177	86	152	232	122	147
ENSG00000157322	CLEC18A	chr16	+	69995488	69995618	69995681	69995785	69994747	69994854	69995890	69995987	4	9	29	4	147	147	0.000262238	0.00195112	0.308	0.879	-0.571	4	9	24	6	147	147	0.00289119	0.0170848	0.308	0.8	-0.492	4	9	15	0	147	147	6.37125e-05	0.000596209	0.308	1	-0.692	4	9	21	4	147
ENSG00000101558	VAPA	chr18	+	9936106	9936210	9936982	9937063	9931773	9931959	9950391	9950565	2	619	81	761	147	147	0	0	0.003	0.096	-0.093	2	619	120	1080	147	147	0	0	0.003	0.1	-0.097	2	619	99	897	147	147	0	0	0.003	0.099	-0.096	2	619	91	972	147
ENSG00000101665	SMAD7	chr18	-	46468850	46468925	46474753	46474807	46446222	46448280	46476181	46477081	84	245	260	371	127	147	1.14724e-06	1.18382e-05	0.284	0.448	-0.164	84	245	202	306	127	147	1.92036e-05	0.000194492	0.284	0.433	-0.149	84	245	163	230	127	147	6.27216e-06	7.04755e-05	0.284	0.451	-0.167	84	245	155	161	127
ENSG00000012061	ERCC1	chr19	-	45923581	45923685	45924435	45924651	45922355	45922455	45926527	45926639	378	495	494	454	147	147	0.000172692	0.00133617	0.433	0.521	-0.088	378	495	379	306	147	147	2.44992e-06	2.8908e-05	0.433	0.553	-0.12	378	495	372	331	147	147	0.000147781	0.00128835	0.433	0.529	-0.096	378	495	429	381	147
ENSG00000065911	MTHFD2	chr2	+	74432831	74433016	74435695	74435848	74425741	74425869	74438325	74438418	408	164	239	21	147	147	1.57452e-12	2.36763e-11	0.713	0.919	-0.206	408	164	321	2	147	147	0	0	0.713	0.994	-0.281	408	164	190	8	147	147	7.77156e-16	1.9708e-14	0.713	0.96	-0.247	408	164	276	18	147
ENSG00000244005	NFS1	chr20	-	34220716	34220845	34243123	34243266	34220438	34220618	34246851	34246936	68	211	203	403	147	147	0.0057576	0.0283254	0.244	0.335	-0.091	68	211	141	273	147	147	0.00620826	0.0322816	0.244	0.341	-0.097	68	211	97	131	147	147	1.49065e-05	0.000158934	0.244	0.425	-0.181	68	211	158	157	147
ENSG00000092758	COL9A3	chr20	+	61455796	61455853	61456319	61456373	61453942	61453984	61457168	61457222	14369	9873	17154	8017	130	127	0	0	0.587	0.676	-0.089	14369	9873	22354	9944	130	127	0	0	0.587	0.687	-0.1	14369	9873	15323	6625	130	127	0	0	0.587	0.693	-0.106	14369	9873	21707	10820	130
ENSG00000101150	TPD52L2	chr20	+	62514102	62514173	62520542	62520591	62505020	62505169	62521202	62522898	3	240	37	306	144	122	7.48279e-07	7.81704e-06	0.01	0.093	-0.083	3	240	26	200	144	122	1.29858e-06	1.59376e-05	0.01	0.099	-0.089	3	240	19	108	144	122	2.36356e-07	3.26279e-06	0.01	0.13	-0.12	3	240	30	191	144
ENSG00000183255	PTTG1IP	chr21	-	46276107	46276279	46281077	46281186	46269499	46271542	46285309	46285362	410	120	1076	0	147	147	0	0	0.774	1	-0.226	410	120	1093	118	147	147	3.74212e-12	7.10293e-11	0.774	0.903	-0.129	410	120	445	50	147	147	4.85984e-08	7.26601e-07	0.774	0.899	-0.125	410	120	737	70	147
ENSG00000196419	XRCC6	chr22	+	42052906	42053036	42057334	42057448	42049532	42049694	42059625	42060038	212	136	543	124	147	147	3.22897e-12	4.78587e-11	0.609	0.814	-0.205	212	136	289	91	147	147	1.08605e-05	0.000115186	0.609	0.761	-0.152	212	136	178	70	147	147	0.0058991	0.0310515	0.609	0.718	-0.109	212	136	300	102	147
ENSG00000196419	XRCC6	chr22	+	42054255	42054356	42057334	42057448	42052906	42053036	42059625	42060038	221	143	549	184	147	147	1.8237e-06	1.84111e-05	0.607	0.749	-0.142	221	143	280	108	147	147	0.000894092	0.00626547	0.607	0.722	-0.115	221	143	195	51	147	147	9.95489e-07	1.26749e-05	0.607	0.793	-0.186	221	143	249	94	147
ENSG00000170275	CRTAP	chr3	+	33171430	33171559	33174046	33174192	33165899	33166071	33175673	33175757	637	843	781	688	147	147	3.81586e-08	4.46206e-07	0.43	0.532	-0.102	637	843	874	753	147	147	2.75157e-09	4.46786e-08	0.43	0.537	-0.107	637	843	1334	1042	147	147	2.44249e-15	6.06002e-14	0.43	0.561	-0.131	637	843	743	754	147
ENSG00000076242	MLH1	chr3	+	37070274	37070423	37081676	37081785	37067466	37067498	37091976	37092028	64	7	166	0	147	147	0.000225734	0.00170685	0.901	1	-0.099	64	7	79	0	147	147	0.00304653	0.0178305	0.901	1	-0.099	64	7	71	0	147	147	0.00431082	0.0240138	0.901	1	-0.099	64	7	57	0	147
ENSG00000136527	TRA2B	chr3	-	185637224	185637284	185638891	185638975	185636152	185636226	185639798	185639914	492	433	1192	671	147	133	4.79624e-08	5.55267e-07	0.507	0.616	-0.109	492	433	1710	883	147	133	9.08051e-12	1.70302e-10	0.507	0.637	-0.13	492	433	1277	817	147	133	6.59798e-05	0.000615163	0.507	0.586	-0.079	492	433	1287	920	147
ENSG00000133657	ATP13A3	chr3	-	194134487	194134568	194140607	194140696	194123408	194126845	194146070	194146258	25	80	130	126	147	147	1.71372e-06	1.73761e-05	0.238	0.508	-0.27	25	80	93	107	147	147	8.90257e-05	0.000801377	0.238	0.465	-0.227	25	80	55	73	147	147	0.00211306	0.0130996	0.238	0.43	-0.192	25	80	170	125	147
ENSG00000065882	TBC1D1	chr4	+	38016129	38016594	38051238	38051480	37978930	37979150	38055819	38055959	127	70	166	26	147	147	3.71146e-07	3.97998e-06	0.645	0.865	-0.22	127	70	152	11	147	147	9.64284e-12	1.80541e-10	0.645	0.933	-0.288	127	70	65	6	147	147	3.23634e-06	3.86844e-05	0.645	0.915	-0.27	127	70	79	6	147
ENSG00000118816	CCNI	chr4	-	77977401	77977476	77979659	77979788	77976302	77976533	77987401	77987558	976	115	627	8	147	147	5.55112e-16	9.27644e-15	0.895	0.987	-0.092	976	115	1171	44	147	147	3.90187e-11	7.05347e-10	0.895	0.964	-0.069	976	115	1049	41	147	147	4.34936e-10	7.84423e-09	0.895	0.962	-0.067	976	115	778	23	147
ENSG00000118785	SPP1	chr4	+	88901197	88901278	88901544	88901586	88898210	88898249	88902626	88902950	1168	516	2843	892	147	115	2.05941e-07	2.27307e-06	0.639	0.714	-0.075	1168	516	954	319	147	115	0.000828193	0.00586717	0.639	0.701	-0.062	1168	516	387	109	147	115	0.000136238	0.0011991	0.639	0.735	-0.096	1168	516	439	132	147
ENSG00000134352	IL6ST	chr5	-	55259973	55260140	55264103	55264215	55259179	55259334	55265377	55265683	1	132	55	579	147	147	0.000136625	0.001086	0.008	0.087	-0.079	1	132	25	238	147	147	0.0001588	0.00134791	0.008	0.095	-0.087	1	132	21	172	147	147	6.83092e-05	0.000632774	0.008	0.109	-0.101	1	132	27	257	147
ENSG00000083312	TNPO1	chr5	+	72192284	72192383	72192882	72192978	72189502	72189530	72195832	72195908	4	50	62	182	147	147	0.00180272	0.0105004	0.074	0.254	-0.18	4	50	42	69	147	147	1.32045e-05	0.00013779	0.074	0.378	-0.304	4	50	28	69	147	147	0.00117418	0.00796084	0.074	0.289	-0.215	4	50	34	75	147
ENSG00000164176	EDIL3	chr5	-	83525672	83525696	83549901	83550030	83433058	83433172	83680125	83680611	874	50	1584	0	147	97	0	0	0.92	1	-0.08	874	50	857	0	147	97	1.16351e-13	2.37646e-12	0.92	1	-0.08	874	50	613	0	147	97	4.54565e-11	8.87853e-10	0.92	1	-0.08	874	50	983	0	147
ENSG00000072682	P4HA2	chr5	-	131533898	131533964	131534013	131534073	131531104	131531173	131534571	131534625	309	232	155	39	133	139	6.31375e-09	7.86726e-08	0.582	0.806	-0.224	309	232	1218	293	133	139	0	0	0.582	0.813	-0.231	309	232	601	192	133	139	8.77631e-13	1.89568e-11	0.582	0.766	-0.184	309	232	1000	207	133
ENSG00000072682	P4HA2	chr5	-	131533898	131533964	131534013	131534133	131531104	131531173	131534571	131534625	155	232	81	39	147	139	1.3446e-07	1.50608e-06	0.387	0.663	-0.276	155	232	602	293	147	139	0	0	0.387	0.66	-0.273	155	232	305	192	147	139	2.93165e-10	5.415e-09	0.387	0.6	-0.213	155	232	522	207	147
ENSG00000204248	COL11A2	chr6	-	33144035	33144245	33144768	33144822	33143350	33143458	33144957	33145002	10802	4076	16720	925	127	147	0	0	0.754	0.954	-0.2	10802	4076	19894	1063	127	147	0	0	0.754	0.956	-0.202	10802	4076	13317	644	127	147	0	0	0.754	0.96	-0.206	10802	4076	19926	510	127
ENSG00000204248	COL11A2	chr6	-	33144043	33144245	33144768	33144822	33143350	33143458	33144957	33145002	10802	2856	16720	731	127	147	0	0	0.814	0.964	-0.15	10802	2856	19894	882	127	147	0	0	0.814	0.963	-0.149	10802	2856	13317	26	127	147	0	0	0.814	0.998	-0.184	10802	2856	19926	700	127
ENSG00000118495	PLAGL1	chr6	-	144269121	144269597	144285923	144285955	144261438	144263800	144290043	144290115	0	160	26	204	105	147	4.09127e-07	4.36715e-06	0	0.151	-0.151	0	160	46	389	105	147	1.89822e-07	2.61085e-06	0	0.142	-0.142	0	160	18	230	105	147	7.73584e-05	0.000711574	0	0.099	-0.099	0	160	23	219	105
ENSG00000026652	AGPAT4	chr6	-	161560453	161560652	161587279	161587449	161551056	161557666	161653067	161653334	447	758	145	165	147	147	0.00202444	0.0116393	0.371	0.468	-0.097	447	758	604	667	147	147	1.55899e-07	2.17252e-06	0.371	0.475	-0.104	447	758	312	292	147	147	3.79219e-09	6.17239e-08	0.371	0.517	-0.146	447	758	453	517	147
ENSG00000164828	SUN1	chr7	+	889156	889240	889559	889670	888054	888252	891020	891119	90	138	400	159	147	147	1.11022e-16	1.88576e-15	0.395	0.716	-0.321	90	138	133	116	147	147	0.00233809	0.0142289	0.395	0.534	-0.139	90	138	102	94	147	147	0.00976402	0.0466198	0.395	0.52	-0.125	90	138	144	84	147
ENSG00000136240	KDELR2	chr7	-	6509226	6509385	6513814	6513915	6505701	6505954	6523597	6523873	527	989	1511	1984	147	147	1.81248e-08	2.19099e-07	0.348	0.432	-0.084	527	989	937	1386	147	147	0.000509227	0.00383453	0.348	0.403	-0.055	527	989	865	1148	147	147	7.69417e-07	9.99045e-06	0.348	0.43	-0.082	527	989	1002	1411	147
ENSG00000049540	ELN	chr7	+	73469045	73469099	73470600	73470687	73467492	73467639	73471001	73471043	650	117	390	41	127	147	0.00413113	0.0213034	0.865	0.917	-0.052	650	117	1179	119	127	147	3.6549e-05	0.000351721	0.865	0.92	-0.055	650	117	1786	178	127	147	5.74635e-06	6.52057e-05	0.865	0.921	-0.056	650	117	630	60	127
ENSG00000049540	ELN	chr7	+	73469045	73469099	73470600	73470741	73467492	73467639	73471001	73471043	650	121	390	31	127	147	1.98706e-05	0.000179394	0.861	0.936	-0.075	650	121	1179	119	127	147	1.06069e-05	0.000112714	0.861	0.92	-0.059	650	121	1786	170	127	147	2.61236e-07	3.59543e-06	0.861	0.924	-0.063	650	121	630	61	127
ENSG00000049540	ELN	chr7	+	73469045	73469099	73470600	73470765	73467492	73467639	73471001	73471043	650	1161	390	526	127	147	0.000732006	0.00483571	0.393	0.462	-0.069	650	1161	1179	1518	127	147	1.51794e-07	2.118e-06	0.393	0.473	-0.08	650	1161	1786	2396	127	147	7.62977e-07	9.92087e-06	0.393	0.463	-0.07	650	1161	630	814	127
ENSG00000147408	CSGALNACT1	chr8	-	19277850	19278029	19297340	19297442	19266123	19266205	19315936	19316153	308	51	478	0	147	147	0	0	0.858	1	-0.142	308	51	551	15	147	147	4.61413e-11	8.24626e-10	0.858	0.973	-0.115	308	51	236	5	147	147	5.14266e-08	7.63909e-07	0.858	0.979	-0.121	308	51	556	8	147
ENSG00000198467	TPM2	chr9	-	35684484	35684547	35685060	35685136	35684242	35684312	35685265	35685336	437	2230	934	1231	147	136	0	0	0.153	0.412	-0.259	437	2230	1155	2226	147	136	0	0	0.153	0.324	-0.171	437	2230	722	1523	147	136	0	0	0.153	0.305	-0.152	437	2230	502	1522	147
ENSG00000198467	TPM2	chr9	-	35684728	35684804	35685060	35685127	35684484	35684547	35685265	35685336	281	3932	682	982	140	147	0	0	0.07	0.422	-0.352	281	3932	635	2302	140	147	0	0	0.07	0.225	-0.155	281	3932	411	1692	140	147	0	0	0.07	0.203	-0.133	281	3932	289	2104	140
ENSG00000198467	TPM2	chr9	-	35684728	35684804	35685060	35685136	35684484	35684547	35685265	35685336	717	3932	1643	982	147	147	0	0	0.154	0.626	-0.472	717	3932	1825	2302	147	147	0	0	0.154	0.442	-0.288	717	3932	1151	1692	147	147	0	0	0.154	0.405	-0.251	717	3932	801	2104	147
ENSG00000196739	COL27A1	chr9	+	116958238	116958292	116967381	116967426	116945301	116945355	116968038	116968092	67	211	344	633	127	118	0.00039747	0.00281771	0.228	0.336	-0.108	67	211	210	361	127	118	0.000182577	0.00153552	0.228	0.351	-0.123	67	211	147	252	127	118	0.000415645	0.00319834	0.228	0.351	-0.123	67	211	205	300	127
ENSG00000196739	COL27A1	chr9	+	117051353	117051575	117052337	117052356	117051193	117051247	117053089	117053197	5	27	105	14	147	92	6.43929e-15	1.04057e-13	0.104	0.824	-0.72	5	27	45	14	147	92	1.77385e-08	2.67878e-07	0.104	0.668	-0.564	5	27	40	13	147	92	5.17841e-08	7.67978e-07	0.104	0.658	-0.554	5	27	48	6	147
ENSG00000196739	COL27A1	chr9	+	117051353	117051575	117052589	117052611	117051193	117051247	117053089	117053197	5	222	105	687	147	95	6.53614e-08	7.51091e-07	0.014	0.09	-0.076	5	222	45	338	147	95	6.55626e-06	7.1605e-05	0.014	0.079	-0.065	5	222	40	288	147	95	5.33587e-06	6.12971e-05	0.014	0.082	-0.068	5	222	48	396	147
ENSG00000196739	COL27A1	chr9	+	117051451	117051575	117052337	117052356	117051193	117051247	117053089	117053197	49	27	276	14	147	92	2.05181e-11	2.9382e-10	0.532	0.925	-0.393	49	27	109	14	147	92	6.19144e-05	0.000570867	0.532	0.83	-0.298	49	27	124	13	147	92	5.92337e-06	6.69661e-05	0.532	0.857	-0.325	49	27	123	6	147
ENSG00000102103	PQBP1	chrX	+	48759074	48759319	48759509	48759794	48758466	48758578	48760008	48760072	2	210	27	257	147	147	1.08007e-05	0.000100734	0.009	0.095	-0.086	2	210	18	152	147	147	1.39885e-05	0.000145283	0.009	0.106	-0.097	2	210	11	153	147	147	0.00222089	0.0136373	0.009	0.067	-0.058	2	210	12	114	147
ENSG00000162413	KLHL21	chr1	-	6655544	6655617	6659106	6659512	6650783	6653718	6661856	6662929	386	217	542	469	147	146	4.16158e-05	0.000359666	0.639	0.534	0.105	386	217	1072	816	147	146	0.00164043	0.0106107	0.639	0.566	0.073	386	217	702	624	147	146	5.07173e-06	5.8739e-05	0.639	0.528	0.111	386	217	1026	885	147
ENSG00000142798	HSPG2	chr1	-	22155875	22156097	22156485	22156584	22155327	22155572	22157474	22157583	675	646	343	452	147	147	0.000395115	0.00280315	0.511	0.431	0.08	675	646	746	933	147	147	0.000290405	0.00231336	0.511	0.444	0.067	675	646	488	606	147	147	0.00150989	0.00983732	0.511	0.446	0.065	675	646	490	708	147
ENSG00000142937	RPS8	chr1	+	45242346	45242446	45243285	45243461	45241705	45241812	45243671	45243759	1129	2422	434	1570	147	147	3.33067e-16	5.60612e-15	0.318	0.217	0.101	1129	2422	681	2691	147	147	0	0	0.318	0.202	0.116	1129	2422	885	3370	147	147	0	0	0.318	0.208	0.11	1129	2422	562	2487	147
ENSG00000060718	COL11A1	chr1	-	103354278	103354314	103354421	103354475	103354132	103354186	103355010	103355118	6998	4901	9264	8317	127	109	0	0	0.551	0.489	0.062	6998	4901	6869	7287	127	109	0	0	0.551	0.447	0.104	6998	4901	5878	5248	127	109	0	0	0.551	0.49	0.061	6998	4901	5896	7336	127
ENSG00000064886	CHI3L2	chr1	+	111778647	111778775	111781371	111781554	111778260	111778385	111783948	111784065	320	4015	0	171	147	147	3.03162e-06	2.9829e-05	0.074	0	0.074	320	4015	0	131	147	147	4.40717e-05	0.000417184	0.074	0	0.074	320	4015	0	75	147	147	0.00212106	0.0131297	0.074	0	0.074	320	4015	0	142	147
ENSG00000143127	ITGA10	chr1	+	145528569	145528684	145530266	145530358	145527612	145527724	145530877	145531026	40	6	0	39	147	147	0	0	0.87	0	0.87	40	6	56	43	147	147	0.000187288	0.00156795	0.87	0.566	0.304	40	6	23	14	147	147	0.00968077	0.046407	0.87	0.622	0.248	40	6	30	36	147
ENSG00000143401	ANP32E	chr1	-	150201404	150201570	150202905	150203028	150198939	150199127	150204114	150204264	118	43	261	366	147	147	4.22662e-13	6.47062e-12	0.733	0.416	0.317	118	43	240	193	147	147	6.06419e-05	0.000560543	0.733	0.554	0.179	118	43	149	134	147	147	1.60795e-05	0.000170058	0.733	0.527	0.206	118	43	174	192	147
ENSG00000234741	GAS5	chr1	-	173833394	173833442	173833812	173833842	173833038	173833213	173834366	173834685	585	151	158	79	103	121	8.57903e-05	0.000701085	0.82	0.701	0.119	585	151	480	264	103	121	1.27555e-10	2.22192e-09	0.82	0.681	0.139	585	151	515	241	103	121	5.91184e-07	7.80874e-06	0.82	0.715	0.105	585	151	428	181	103
ENSG00000234741	GAS5	chr1	-	173833394	173834420	173834994	173835032	173833038	173833213	173835314	173835344	796	128	255	97	111	147	3.04906e-08	3.60618e-07	0.892	0.777	0.115	796	128	892	241	111	147	1.1411e-05	0.000120444	0.892	0.831	0.061	796	128	819	227	111	147	5.53125e-06	6.31553e-05	0.892	0.827	0.065	796	128	679	175	111
ENSG00000143337	TOR1AIP1	chr1	+	179858444	179858504	179869260	179869302	179853826	179853904	179870436	179870523	64	59	173	304	133	115	0.00163783	0.00967933	0.484	0.33	0.154	64	59	10	211	133	115	0	0	0.484	0.039	0.445	64	59	8	130	133	115	0	0	0.484	0.051	0.433	64	59	9	200	133
ENSG00000116260	QSOX1	chr1	+	180145065	180145168	180147928	180148019	180144455	180144501	180151308	180151454	211	366	145	410	147	147	0.000154865	0.00121133	0.366	0.261	0.105	211	366	90	303	147	147	5.1737e-06	5.77075e-05	0.366	0.229	0.137	211	366	110	307	147	147	0.000667077	0.00487173	0.366	0.264	0.102	211	366	103	297	147
ENSG00000130595	TNNT3	chr11	+	1957443	1957484	1958192	1958233	1956058	1956149	1959667	1959935	653	764	0	19	114	114	4.98559e-06	4.77918e-05	0.461	0	0.461	653	764	8	91	114	114	8.88178e-16	1.98739e-14	0.461	0.081	0.38	653	764	0	94	114	114	0	0	0.461	0	0.461	653	764	0	48	114
ENSG00000149968	MMP3	chr11	-	102711159	102711324	102712884	102713010	102710838	102710983	102713161	102713310	18964	22008	3398	5730	147	147	0	0	0.463	0.372	0.091	18964	22008	4776	8007	147	147	0	0	0.463	0.374	0.089	18964	22008	3108	5863	147	147	0	0	0.463	0.346	0.117	18964	22008	4733	6858	147
ENSG00000139219	COL2A1	chr12	-	48378777	48378876	48379333	48379564	48378328	48378382	48379694	48379748	3861	58118	36	90621	147	147	0	0	0.062	0	0.062	3861	58118	36	61049	147	147	0	0	0.062	0.001	0.061	3861	58118	15	88339	147	147	0	0	0.062	0	0.062	3861	58118	32	90996	147
ENSG00000139219	COL2A1	chr12	-	48380860	48380895	48380895	48381096	48380617	48380671	48381393	48381492	51955	15687	74150	37298	147	108	0	0	0.709	0.594	0.115	51955	15687	48865	40891	147	108	0	0	0.709	0.468	0.241	51955	15687	39720	27449	147	108	0	0	0.709	0.515	0.194	51955	15687	67055	33180	147
ENSG00000111481	COPZ1	chr12	+	54737029	54737100	54739243	54739299	54735989	54736071	54741550	54741628	40	254	27	370	144	129	0.00312957	0.0167607	0.124	0.061	0.063	40	254	8	253	144	129	4.53285e-06	5.09726e-05	0.124	0.028	0.096	40	254	0	263	144	129	6.06981e-12	1.2355e-10	0.124	0	0.124	40	254	0	396	144
ENSG00000214548	MEG3	chr14	+	101297757	101297871	101298848	101298978	101295370	101296086	101302503	101302637	803	60	389	96	147	147	5.36682e-12	7.87923e-11	0.93	0.802	0.128	803	60	1588	219	147	147	2.6409e-05	0.000261219	0.93	0.879	0.051	803	60	908	210	147	147	4.32987e-15	1.06279e-13	0.93	0.812	0.118	803	60	998	257	147
ENSG00000214548	MEG3	chr14	+	101297757	101297871	101300968	101301088	101295370	101296086	101302503	101302637	803	43	389	159	147	147	0	0	0.949	0.71	0.239	803	43	1588	728	147	147	0	0	0.949	0.686	0.263	803	43	908	344	147	147	0	0	0.949	0.725	0.224	803	43	998	360	147
ENSG00000214548	MEG3	chr14	+	101297757	101297871	101302075	101302216	101295370	101296086	101302503	101302637	803	425	389	489	147	147	0	0	0.654	0.443	0.211	803	425	1588	1535	147	147	0	0	0.654	0.508	0.146	803	425	908	1328	147	147	0	0	0.654	0.406	0.248	803	425	998	1051	147
ENSG00000214548	MEG3	chr14	+	101298848	101298978	101300968	101301088	101295370	101296086	101302503	101302637	60	43	96	159	147	147	0.000407259	0.00288272	0.583	0.376	0.207	60	43	219	728	147	147	8.32667e-13	1.63986e-11	0.583	0.231	0.352	60	43	210	344	147	147	0.000140973	0.00123604	0.583	0.379	0.204	60	43	257	360	147
ENSG00000175265	GOLGA8A	chr15	-	34681844	34681969	34828065	34828190	34678825	34680153	34829544	34829848	5	14	2	51	147	147	0.0106934	0.0474425	0.263	0.038	0.225	5	14	1	111	147	147	0.000154979	0.00131852	0.263	0.009	0.254	5	14	1	62	147	147	0.00163284	0.0104912	0.263	0.016	0.247	5	14	3	70	147
ENSG00000140416	TPM1	chr15	+	63353911	63353987	63354413	63354476	63353067	63353138	63354774	63354844	801	857	64	437	147	136	0	0	0.464	0.119	0.345	801	857	33	158	147	136	0	0	0.464	0.162	0.302	801	857	56	192	147	136	5.32907e-15	1.30109e-13	0.464	0.212	0.252	801	857	14	147	147
ENSG00000067225	PKM	chr15	-	72494794	72494961	72495362	72495529	72492814	72492996	72499068	72499221	317	1388	400	3844	147	147	0	0	0.186	0.094	0.092	317	1388	217	2362	147	147	0	0	0.186	0.084	0.102	317	1388	178	1568	147	147	1.64779e-12	3.48542e-11	0.186	0.102	0.084	317	1388	245	1556	147
ENSG00000185787	MORF4L1	chr15	+	79174179	79174317	79177308	79177425	79172853	79172921	79178482	79178569	5	34	0	56	147	147	0.00592986	0.0290654	0.128	0	0.128	5	34	0	49	147	147	0.00854188	0.0417574	0.128	0	0.128	5	34	0	63	147	147	0.00426202	0.0237989	0.128	0	0.128	5	34	0	57	147
ENSG00000185787	MORF4L1	chr15	+	79174179	79174317	79177311	79177425	79172853	79172921	79178482	79178569	5	19	0	37	147	147	0.00390431	0.0202571	0.208	0	0.208	5	19	0	36	147	147	0.00425079	0.0234924	0.208	0	0.208	5	19	0	32	147	147	0.00608696	0.031677	0.208	0	0.208	5	19	0	36	147
ENSG00000168488	ATXN2L	chr16	+	28843822	28843888	28844137	28844208	28843525	28843720	28844379	28844675	54	304	19	458	139	144	1.95465e-08	2.35672e-07	0.155	0.041	0.114	54	304	34	528	139	144	8.2433e-06	8.8971e-05	0.155	0.063	0.092	54	304	22	411	139	144	1.93847e-06	2.38861e-05	0.155	0.053	0.102	54	304	20	408	139
ENSG00000264772	RP11-186B7.4	chr17	+	7477577	7477626	7477863	7477996	7476143	7476182	7478436	7478576	1102	1435	1632	2640	122	147	2.18244e-05	0.000195705	0.481	0.427	0.054	1102	1435	915	1864	122	147	3.21965e-15	7.06078e-14	0.481	0.372	0.109	1102	1435	1123	2003	122	147	9.22683e-09	1.45287e-07	0.481	0.403	0.078	1102	1435	937	1663	122
ENSG00000166579	NDEL1	chr17	+	8358113	8358205	8363326	8363478	8354097	8354271	8370247	8371478	297	113	303	171	147	147	0.0068572	0.0328327	0.724	0.639	0.085	297	113	320	355	147	147	3.33067e-16	7.62315e-15	0.724	0.474	0.25	297	113	349	298	147	147	1.31278e-09	2.25258e-08	0.724	0.539	0.185	297	113	412	265	147
ENSG00000065320	NTN1	chr17	+	9066129	9066318	9083123	9083273	8925619	8926708	9086232	9086286	95	72	42	67	147	147	0.00292787	0.0158907	0.569	0.385	0.184	95	72	74	99	147	147	0.00947528	0.0452946	0.569	0.428	0.141	95	72	45	75	147	147	0.00120753	0.00817489	0.569	0.375	0.194	95	72	32	67	147
ENSG00000108821	COL1A1	chr17	-	48270157	48270193	48271933	48272125	48270000	48270054	48272927	48273026	1272	1629	0	578	147	109	0	0	0.367	0	0.367	1272	1629	0	2303	147	109	0	0	0.367	0	0.367	1272	1629	0	6529	147	109	0	0	0.367	0	0.367	1272	1629	0	483	147
ENSG00000132471	WBP2	chr17	-	73843876	73844011	73844650	73844743	73843567	73843690	73845684	73845820	620	193	303	240	147	147	3.55271e-15	5.77114e-14	0.763	0.558	0.205	620	193	432	278	147	147	8.67892e-11	1.5263e-09	0.763	0.608	0.155	620	193	187	134	147	147	3.55905e-09	5.82984e-08	0.763	0.583	0.18	620	193	362	250	147
ENSG00000099783	HNRNPM	chr19	+	8527412	8527465	8528380	8528388	8520288	8520458	8528476	8528570	178	19	920	182	126	81	0.0102281	0.0457706	0.858	0.765	0.093	178	19	162	47	126	81	0.000405189	0.00314136	0.858	0.689	0.169	178	19	103	32	126	81	0.000591625	0.00434837	0.858	0.674	0.184	178	19	191	66	126
ENSG00000167460	TPM4	chr19	+	16192722	16192856	16197232	16197350	16187308	16187507	16198836	16199262	546	94	627	215	147	147	2.58568e-07	2.81491e-06	0.853	0.745	0.108	546	94	671	227	147	147	3.3019e-07	4.35859e-06	0.853	0.747	0.106	546	94	639	191	147	147	5.46292e-05	0.000515942	0.853	0.77	0.083	546	94	705	275	147
ENSG00000090006	LTBP4	chr19	+	41128305	41128572	41129508	41129637	41125251	41125398	41131761	41131914	601	282	166	132	147	147	0.000134624	0.00107101	0.681	0.557	0.124	601	282	361	443	147	147	0	0	0.681	0.449	0.232	601	282	477	320	147	147	0.000467317	0.00353958	0.681	0.598	0.083	601	282	212	286	147
ENSG00000011422	PLAUR	chr19	-	44160630	44160792	44169467	44169608	44152730	44153295	44171732	44171843	29	5	42	126	147	147	4.39856e-11	6.1678e-10	0.853	0.25	0.603	29	5	17	38	147	147	3.56557e-07	4.68417e-06	0.853	0.309	0.544	29	5	14	27	147	147	6.03572e-06	6.81525e-05	0.853	0.341	0.512	29	5	22	46	147
ENSG00000105373	GLTSCR2	chr19	+	48259012	48259079	48259784	48259861	48258604	48258780	48259944	48260001	349	630	74	228	140	147	0.000254423	0.00190062	0.368	0.254	0.114	349	630	231	897	140	147	7.77156e-15	1.68089e-13	0.368	0.213	0.155	349	630	247	779	140	147	1.44488e-08	2.23677e-07	0.368	0.25	0.118	349	630	119	649	140
ENSG00000115241	PPM1G	chr2	-	27605342	27605472	27606232	27606467	27604992	27605095	27606818	27606959	321	165	655	578	147	147	9.53806e-07	9.87544e-06	0.66	0.531	0.129	321	165	273	270	147	147	3.04607e-07	4.05983e-06	0.66	0.503	0.157	321	165	281	232	147	147	0.00027508	0.00222292	0.66	0.548	0.112	321	165	200	222	147
ENSG00000114993	RTKN	chr2	-	74654632	74654719	74655394	74655523	74654295	74654400	74655757	74655864	137	0	260	24	147	147	5.23436e-05	0.000442922	1	0.915	0.085	137	0	162	19	147	147	1.29956e-05	0.000135738	1	0.895	0.105	137	0	63	18	147	147	3.95879e-09	6.42079e-08	1	0.778	0.222	137	0	87	19	147
ENSG00000115540	MOB4	chr2	+	198400253	198400354	198413059	198413139	198380770	198380870	198414998	198415110	37	51	32	194	147	147	2.94786e-07	3.17946e-06	0.42	0.142	0.278	37	51	34	101	147	147	0.00906001	0.0437656	0.42	0.252	0.168	37	51	22	72	147	147	0.00752672	0.0376131	0.42	0.234	0.186	37	51	30	163	147
ENSG00000196141	SPATS2L	chr2	+	201248589	201248740	201253945	201254006	201242863	201243094	201277033	201277142	15	171	1	404	147	134	7.54668e-07	7.87494e-06	0.074	0.002	0.072	15	171	0	277	147	134	3.30335e-06	3.82403e-05	0.074	0	0.074	15	171	0	379	147	134	4.53518e-07	6.06895e-06	0.074	0	0.074	15	171	2	221	147
ENSG00000092758	COL9A3	chr20	+	61457555	61457609	61458118	61458172	61456319	61456373	61458592	61458646	3142	10382	1181	11012	127	127	0	0	0.232	0.097	0.135	3142	10382	0	14043	127	127	0	0	0.232	0	0.232	3142	10382	0	9617	127	127	0	0	0.232	0	0.232	3142	10382	2570	15105	127
ENSG00000168137	SETD5	chr3	+	9491163	9491276	9494571	9494635	9490078	9490314	9495422	9495552	22	0	5	9	147	137	1.28929e-05	0.000119173	1	0.341	0.659	22	0	34	12	147	137	0.00290217	0.0171222	1	0.725	0.275	22	0	10	8	147	137	0.000322616	0.00255532	1	0.538	0.462	22	0	24	10	147
ENSG00000145901	TNIP1	chr5	-	150413168	150413360	150414562	150414628	150411847	150411944	150415142	150415268	1471	413	394	204	139	147	4.49339e-09	5.63672e-08	0.79	0.671	0.119	1471	413	1561	778	139	147	2.22045e-16	5.10332e-15	0.79	0.68	0.11	1471	413	663	346	139	147	1.10556e-12	2.36574e-11	0.79	0.67	0.12	1471	413	861	483	139
ENSG00000204248	COL11A2	chr6	-	33136295	33136349	33137159	33137305	33135575	33135629	33137607	33137661	3719	18228	4	22603	147	127	0	0	0.15	0	0.15	3719	18228	1	27593	147	127	0	0	0.15	0	0.15	3719	18228	0	18042	147	127	0	0	0.15	0	0.15	3719	18228	0	23875	147
ENSG00000204248	COL11A2	chr6	-	33136299	33136349	33137159	33137305	33135575	33135629	33137607	33137661	3719	323	4	629	147	123	0	0	0.906	0.005	0.901	3719	323	1	1427	147	123	0	0	0.906	0.001	0.905	3719	323	0	505	147	123	0	0	0.906	0	0.906	3719	323	0	1268	147
ENSG00000204248	COL11A2	chr6	-	33144209	33144263	33144497	33144542	33144035	33144080	33144768	33144822	8499	7196	7291	10766	118	127	0	0	0.56	0.422	0.138	8499	7196	9589	12072	118	127	0	0	0.56	0.461	0.099	8499	7196	6147	6688	118	127	0	0	0.56	0.497	0.063	8499	7196	8752	11739	118
ENSG00000204248	COL11A2	chr6	-	33145438	33145483	33145908	33145952	33145188	33145242	33146084	33146129	770	10248	4	16448	117	118	0	0	0.07	0	0.07	770	10248	3	17806	117	118	0	0	0.07	0	0.07	770	10248	2	12685	117	118	0	0	0.07	0	0.07	770	10248	3	15455	117
ENSG00000203875	SNHG5	chr6	-	86387141	86387210	86387512	86387560	86386724	86386909	86387671	86387750	81	454	0	103	121	142	1.20423e-07	1.35867e-06	0.173	0	0.173	81	454	0	745	121	142	0	0	0.173	0	0.173	81	454	0	781	121	142	0	0	0.173	0	0.173	81	454	0	331	121
ENSG00000164919	COX6C	chr8	-	100899717	100899846	100904135	100904275	100890376	100890493	100905866	100905909	23	39	12	75	147	147	0.00111243	0.00696424	0.371	0.138	0.233	23	39	0	48	147	147	1.00785e-07	1.42798e-06	0.371	0	0.371	23	39	8	57	147	147	0.00112515	0.00766238	0.371	0.123	0.248	23	39	3	44	147
ENSG00000104419	NDRG1	chr8	-	134276789	134276895	134292474	134292510	134274289	134274410	134296491	134296572	455	765	82	202	109	147	0.00704744	0.0336226	0.445	0.354	0.091	455	765	1745	4115	109	147	3.61639e-07	4.73962e-06	0.445	0.364	0.081	455	765	1050	2174	109	147	0.00316985	0.0185903	0.445	0.394	0.051	455	765	946	2039	109
ENSG00000104529	EEF1D	chr8	-	144663398	144663496	144668388	144668460	144663223	144663324	144668898	144669019	957	738	504	477	145	147	0.0111583	0.0491303	0.568	0.517	0.051	957	738	589	721	145	147	4.0736e-10	6.88883e-09	0.568	0.453	0.115	957	738	692	716	145	147	4.96132e-05	0.000471968	0.568	0.495	0.073	957	738	552	552	145
ENSG00000196739	COL27A1	chr9	+	117052337	117052356	117052589	117052611	117051193	117051247	117053089	117053197	41	222	14	767	92	95	2.9976e-15	4.88646e-14	0.16	0.018	0.142	41	222	31	338	92	95	0.00564511	0.0298091	0.16	0.087	0.073	41	222	13	288	92	95	4.5788e-06	5.34775e-05	0.16	0.045	0.115	41	222	6	396	92
ENSG00000041982	TNC	chr9	-	117810538	117810811	117815018	117815294	117808688	117808961	117819431	117819704	144	441	86	797	147	147	3.41949e-14	5.42225e-13	0.246	0.097	0.149	144	441	37	377	147	147	5.66714e-11	1.00305e-09	0.246	0.089	0.157	144	441	28	274	147	147	9.86704e-09	1.54837e-07	0.246	0.093	0.153	144	441	14	158	147
ENSG00000041982	TNC	chr9	-	117810538	117810811	117826074	117826240	117808688	117808961	117835881	117836145	71	257	25	408	147	147	6.32763e-11	8.817e-10	0.216	0.058	0.158	71	257	28	224	147	147	0.000701346	0.00506734	0.216	0.111	0.105	71	257	21	155	147	147	0.00595028	0.0312134	0.216	0.119	0.097	71	257	0	79	147
ENSG00000102265	TIMP1	chrX	+	47444603	47444730	47444941	47445066	47444334	47444414	47445919	47446188	9827	7523	11228	10956	147	147	0	0	0.566	0.506	0.06	9827	7523	7543	8360	147	147	0	0	0.566	0.474	0.092	9827	7523	4468	4269	147	147	0	0	0.566	0.511	0.055	9827	7523	5564	5528	147
ENSG00000147403	RPL10	chrX	+	153626837	153626883	153627678	153627737	153626570	153626735	153627827	153627935	21	4	9	16	119	132	0.00054706	0.0037469	0.853	0.384	0.469	21	4	9	29	119	132	2.12415e-06	2.53907e-05	0.853	0.256	0.597	21	4	8	34	119	132	1.62215e-07	2.25969e-06	0.853	0.207	0.646	21	4	6	25	119
[truncated: 6 more columns]

## Sheet: A5SS
GeneID	geneSymbol	chr	strand	longExonStart_0base	longExonEnd	shortES	shortEE	flankingES	flankingEE	IJC_SAMPLE_1 (R08-269A vs. 14 week control)	SJC_SAMPLE_1 (R08-269A vs. 14 week control)	IJC_SAMPLE_2 (R08-269A vs. 14 week control)	SJC_SAMPLE_2 (R08-269A vs. 14 week control)	IncFormLen (R08-269A vs. 14 week control)	SkipFormLen (R08-269A vs. 14 week control)	PValue (R08-269A vs. 14 week control)	FDR (R08-269A vs. 14 week control)	IncLevel1 (R08-269A vs. 14 week control)	IncLevel2 (R08-269A vs. 14 week control)	IncLevelDifference (R08-269A vs. 14 week control)	IJC_SAMPLE_1 (R08-269A vs. 14 week control)	SJC_SAMPLE_1 (R08-269A vs. 14 week control)	IJC_SAMPLE_2 (R08-269A vs. 14 week control)	SJC_SAMPLE_2 (R08-269A vs. 14 week control)	IncFormLen (R08-269A vs. 14 week control)	SkipFormLen (R08-269A vs. 14 week control)	PValue (R08-269A vs. 14 week control)	FDR (R08-269A vs. 14 week control)	IncLevel1 (R08-269A vs. 14 week control)	IncLevel2 (R08-269A vs. 14 week control)	IncLevelDifference (R08-269A vs. 14 week control)	IJC_SAMPLE_1 (R08-269A vs. 15 week control)	SJC_SAMPLE_1 (R08-269A vs. 15 week control)	IJC_SAMPLE_2 (R08-269A vs. 15 week control)	SJC_SAMPLE_2 (R08-269A vs. 15 week control)	IncFormLen (R08-269A vs. 15 week control)	SkipFormLen (R08-269A vs. 15 week control)	PValue (R08-269A vs. 15 week control)	FDR (R08-269A vs. 15 week control)	IncLevel1 (R08-269A vs. 15 week control)	IncLevel2 (R08-269A vs. 15 week control)	IncLevelDifference (R08-269A vs. 15 week control)	IJC_SAMPLE_1 (R08-269A vs. 18 week control)	SJC_SAMPLE_1 (R08-269A vs. 18 week control)	IJC_SAMPLE_2 (R08-269A vs. 18 week control)	SJC_SAMPLE_2 (R08-269A vs. 18 week control)	IncFormLen (R08-269A vs. 18 week control)	SkipFormLen (R08-269A vs. 18 week control)	PValue (R08-269A vs. 18 week control)
ENSG00000074800	ENO1	chr1	-	8930510	8930569	8930519	8930569	8928046	8928116	5054	369	8139	0	82	74	0	0	0.925	1	-0.075	5054	369	8892	0	82	74	0	0	0.925	1	-0.075	5054	369	4878	0	82	74	0	0	0.925	1	-0.075	5054	369	8326	0	82	74	0
ENSG00000142669	SH3BGRL3	chr1	+	26607255	26607413	26607255	26607366	26607548	26608007	1196	173	2705	101	120	74	0	0	0.81	0.943	-0.133	1196	173	1766	132	120	74	4.9261e-08	1.19983e-06	0.81	0.892	-0.082	1196	173	1428	56	120	74	0	0	0.81	0.94	-0.13	1196	173	1674	4	120	74	0
ENSG00000142669	SH3BGRL3	chr1	+	26607255	26607418	26607255	26607366	26607548	26608007	1325	173	2948	101	125	74	0	0	0.819	0.945	-0.126	1325	173	1942	132	125	74	6.06577e-08	1.46103e-06	0.819	0.897	-0.078	1325	173	1572	56	125	74	0	0	0.819	0.943	-0.124	1325	173	1841	4	125	74	0
ENSG00000066322	ELOVL1	chr1	-	43830212	43830318	43830285	43830318	43829994	43830131	371	23	449	0	146	74	3.23631e-08	9.24456e-07	0.891	1	-0.109	371	23	244	0	146	74	9.46275e-06	0.000168239	0.891	1	-0.109	371	23	157	0	146	74	0.000223981	0.00299532	0.891	1	-0.109	371	23	287	0	146	74	2.41191e-06
ENSG00000213366	GSTM2	chr1	+	110212092	110212335	110212092	110212193	110213908	110214004	10	82	30	23	147	74	4.68182e-09	1.45169e-07	0.058	0.396	-0.338	10	82	51	68	147	74	1.52626e-07	3.49783e-06	0.058	0.274	-0.216	10	82	70	107	147	74	3.01976e-07	6.9636e-06	0.058	0.248	-0.19	10	82	31	43	147	74	3.89042e-06
ENSG00000143127	ITGA10	chr1	+	145528569	145528704	145528569	145528684	145530266	145530394	15	397	101	766	93	74	6.06052e-07	1.46105e-05	0.029	0.095	-0.066	15	397	77	507	93	74	7.1902e-08	1.71664e-06	0.029	0.108	-0.079	15	397	34	290	93	74	0.000227886	0.00302367	0.029	0.085	-0.056	15	397	54	428	93	74	1.39649e-05
ENSG00000143127	ITGA10	chr1	+	145528569	145528756	145528569	145528684	145530266	145530394	57	397	299	766	145	74	9.71645e-12	3.91837e-10	0.068	0.166	-0.098	57	397	320	507	145	74	0	0	0.068	0.244	-0.176	57	397	135	290	145	74	3.92497e-12	1.53058e-10	0.068	0.192	-0.124	57	397	194	428	145	74	2.45803e-13
ENSG00000132676	DAP3	chr1	+	155658881	155659034	155658881	155658965	155679563	155679615	17	87	60	73	142	74	1.77188e-06	3.89494e-05	0.092	0.3	-0.208	17	87	29	34	142	74	4.28574e-05	0.000668908	0.092	0.308	-0.216	17	87	35	49	142	74	0.000121562	0.00176688	0.092	0.271	-0.179	17	87	33	51	142	74	0.000431232
ENSG00000234741	GAS5	chr1	-	173833394	173833842	173833812	173833842	173833038	173833213	126	15	97	0	147	74	0.000143771	0.0020971	0.809	1	-0.191	126	15	241	0	147	74	1.49486e-07	3.43313e-06	0.809	1	-0.191	126	15	227	0	147	74	2.51322e-07	5.90916e-06	0.809	1	-0.191	126	15	173	0	147	74	2.38529e-06
ENSG00000196878	LAMB3	chr1	-	209824261	209824326	209824296	209824326	209823308	209823463	1803	154	698	0	108	74	0	0	0.889	1	-0.111	1803	154	904	0	108	74	0	0	0.889	1	-0.111	1803	154	438	0	108	74	2.87548e-14	1.30732e-12	0.889	1	-0.111	1803	154	876	0	108	74	0
ENSG00000123689	G0S2	chr1	+	209848764	209848894	209848764	209848817	209848997	209849733	13243	586	810	0	147	74	1.32117e-14	6.24649e-13	0.919	1	-0.081	13243	586	4062	0	147	74	0	0	0.919	1	-0.081	13243	586	2229	0	147	74	0	0	0.919	1	-0.081	13243	586	2390	0	147	74	0
ENSG00000143753	DEGS1	chr1	+	224370872	224371120	224370872	224371070	224377278	224378021	269	26	807	0	123	74	1.05471e-14	5.03006e-13	0.862	1	-0.138	269	26	302	0	123	74	7.17282e-09	1.93346e-07	0.862	1	-0.138	269	26	326	0	123	74	2.83628e-09	8.19532e-08	0.862	1	-0.138	269	26	306	0	123	74	6.12594e-09
ENSG00000168264	IRF2BP2	chr1	-	234744192	234745271	234744240	234745271	234740014	234743598	75	155	141	116	121	74	7.52622e-07	1.75649e-05	0.228	0.426	-0.198	75	155	270	305	121	74	0.000184652	0.00244619	0.228	0.351	-0.123	75	155	201	213	121	74	8.32063e-05	0.00125109	0.228	0.366	-0.138	75	155	189	188	121	74	2.20689e-05
ENSG00000134453	RBM17	chr10	+	6131033	6131156	6131033	6131147	6139010	6139151	41	8	142	0	82	74	1.03933e-05	0.000196016	0.822	1	-0.178	41	8	70	0	82	74	0.00032615	0.00406303	0.822	1	-0.178	41	8	89	0	82	74	0.000105688	0.00156461	0.822	1	-0.178	41	8	64	0	82	74	0.000488374
ENSG00000096746	HNRNPH3	chr10	+	70098259	70098426	70098259	70098399	70098896	70098983	153	174	397	245	100	74	8.45905e-06	0.000163071	0.394	0.545	-0.151	153	174	469	149	100	74	0	0	0.394	0.7	-0.306	153	174	347	130	100	74	1.03806e-13	4.58898e-12	0.394	0.664	-0.27	153	174	287	148	100	74	1.1639e-07
ENSG00000096746	HNRNPH3	chr10	+	70098259	70098444	70098259	70098399	70098896	70098983	596	174	1452	245	118	74	9.73119e-07	2.19632e-05	0.682	0.788	-0.106	596	174	1657	149	118	74	0	0	0.682	0.875	-0.193	596	174	1079	130	118	74	2.19746e-12	8.8202e-11	0.682	0.839	-0.157	596	174	1033	148	118	74	7.39731e-09
ENSG00000214655	ZSWIM8	chr10	+	75558831	75558943	75558831	75558883	75559877	75559952	29	6	131	0	133	74	3.90258e-05	0.000651364	0.729	1	-0.271	29	6	100	0	133	74	0.0001253	0.00174281	0.729	1	-0.271	29	6	58	0	133	74	0.0011652	0.0121895	0.729	1	-0.271	29	6	67	0	133	74	0.000660323
ENSG00000175470	PPP2R2D	chr10	+	133754110	133754308	133754110	133754198	133757598	133757649	4	28	15	19	147	74	0.00442002	0.0395136	0.067	0.284	-0.217	4	28	32	27	147	74	6.0165e-05	0.000911538	0.067	0.374	-0.307	4	28	33	22	147	74	8.61987e-06	0.000157506	0.067	0.43	-0.363	4	28	24	30	147	74	0.00169709
ENSG00000182272	B4GALNT4	chr11	+	380100	380202	380100	380129	380291	380445	97	11	68	0	146	74	0.00195903	0.0202914	0.817	1	-0.183	97	11	109	0	146	74	0.000189662	0.00249734	0.817	1	-0.183	97	11	76	0	146	74	0.00118145	0.0123192	0.817	1	-0.183	97	11	72	0	146	74	0.00151594
ENSG00000167770	OTUB1	chr11	+	63764001	63764413	63764001	63764120	63764521	63764716	222	21	446	0	147	74	2.98151e-10	1.05497e-08	0.842	1	-0.158	222	21	268	0	147	74	8.48566e-08	2.00438e-06	0.842	1	-0.158	222	21	204	0	147	74	1.19565e-06	2.53758e-05	0.842	1	-0.158	222	21	209	0	147	74	9.56998e-07
ENSG00000149823	VPS51	chr11	+	64877176	64877395	64877176	64877260	64877953	64878075	309	27	314	0	147	74	1.03765e-08	3.09294e-07	0.852	1	-0.148	309	27	339	0	147	74	4.05216e-09	1.13158e-07	0.852	1	-0.148	309	27	397	0	147	74	5.32742e-10	1.68112e-08	0.852	1	-0.148	309	27	208	0	147	74	9.65475e-07
ENSG00000137693	YAP1	chr11	+	102056748	102056868	102056748	102056862	102076623	102076805	6	160	99	364	79	74	3.93759e-09	1.23404e-07	0.034	0.203	-0.169	6	160	38	266	79	74	0.000794349	0.00867238	0.034	0.118	-0.084	6	160	30	201	79	74	0.000811749	0.00893016	0.034	0.123	-0.089	6	160	32	230	79	74	0.0013777
ENSG00000076043	REXO2	chr11	+	114311377	114311475	114311377	114311461	114316700	114316809	2	22	15	4	87	74	1.96033e-06	4.28344e-05	0.072	0.761	-0.689	2	22	22	14	87	74	2.41855e-05	0.000399889	0.072	0.572	-0.5	2	22	14	16	87	74	0.00177935	0.0172766	0.072	0.427	-0.355	2	22	16	10	87	74	6.76332e-05
ENSG00000060138	YBX3	chr12	-	10856649	10856747	10856653	10856747	10854558	10854730	32	30	53	0	77	74	5.87829e-11	2.22341e-09	0.506	1	-0.494	32	30	60	0	77	74	7.79221e-12	2.6535e-10	0.506	1	-0.494	32	30	38	0	77	74	7.88316e-09	2.17308e-07	0.506	1	-0.494	32	30	27	0	77	74	5.36143e-07
ENSG00000122042	UBL3	chr13	-	30341754	30341832	30341788	30341832	30338507	30341444	240	30	267	0	107	74	5.48138e-10	1.8967e-08	0.847	1	-0.153	240	30	557	0	107	74	5.77316e-15	2.41207e-13	0.847	1	-0.153	240	30	452	0	107	74	1.8674e-13	8.06933e-12	0.847	1	-0.153	240	30	498	0	107	74	3.77476e-14
ENSG00000122042	UBL3	chr13	-	30351291	30351400	30351379	30351400	30346248	30346335	308	9	334	0	147	74	0.00212633	0.0216361	0.945	1	-0.055	308	9	536	0	147	74	0.000452961	0.00538939	0.945	1	-0.055	308	9	363	0	147	74	0.00162078	0.0160125	0.945	1	-0.055	308	9	457	0	147	74	0.000760024
ENSG00000214548	MEG3	chr14	+	101296045	101296124	101296045	101296086	101297757	101297871	68	376	80	228	111	74	0.000346927	0.00459595	0.108	0.19	-0.082	68	376	290	951	111	74	0.000270792	0.00344048	0.108	0.169	-0.061	68	376	202	495	111	74	6.72551e-08	1.70232e-06	0.108	0.214	-0.106	68	376	177	587	111	74	0.000920113
ENSG00000197102	DYNC1H1	chr14	+	102496155	102496275	102496155	102496242	102496498	102496619	160	15	572	0	106	74	2.0168e-09	6.60367e-08	0.882	1	-0.118	160	15	341	0	106	74	1.24539e-07	2.87233e-06	0.882	1	-0.118	160	15	186	0	106	74	1.18132e-05	0.000208316	0.882	1	-0.118	160	15	239	0	106	74	1.94313e-06
ENSG00000182979	MTA1	chr14	+	105916394	105916661	105916394	105916521	105920529	105920647	148	13	232	0	147	74	5.20225e-06	0.000104512	0.851	1	-0.149	148	13	240	0	147	74	4.1061e-06	7.77084e-05	0.851	1	-0.149	148	13	208	0	147	74	1.09833e-05	0.000195116	0.851	1	-0.149	148	13	160	0	147	74	5.96657e-05
ENSG00000167004	PDIA3	chr15	+	44055274	44055404	44055274	44055386	44057647	44057764	414	19	992	0	91	74	6.15199e-08	1.72146e-06	0.947	1	-0.053	414	19	802	0	91	74	2.08075e-07	4.68945e-06	0.947	1	-0.053	414	19	722	0	91	74	3.98092e-07	9.02812e-06	0.947	1	-0.053	414	19	635	0	91	74	9.01247e-07
ENSG00000103266	STUB1	chr16	+	731792	731903	731792	731880	732019	732076	30	172	120	307	96	74	0.000185055	0.00263619	0.119	0.232	-0.113	30	172	39	96	96	74	0.00203581	0.0194162	0.119	0.238	-0.119	30	172	45	83	96	74	2.41646e-05	0.000404556	0.119	0.295	-0.176	30	172	37	74	96	74	0.000194509
ENSG00000149925	ALDOA	chr16	+	30078554	30078660	30078554	30078654	30078770	30078982	180	253	354	177	79	74	5.55112e-15	2.69426e-13	0.4	0.652	-0.252	180	253	1077	437	79	74	0	0	0.4	0.698	-0.298	180	253	744	347	79	74	0	0	0.4	0.668	-0.268	180	253	621	251	79	74	0
ENSG00000103510	KAT8	chr16	+	31129017	31129213	31129017	31129181	31131506	31131581	133	15	167	0	105	74	6.14392e-06	0.00012121	0.862	1	-0.138	133	15	128	0	105	74	3.90858e-05	0.000618033	0.862	1	-0.138	133	15	108	0	105	74	0.000115204	0.00168212	0.862	1	-0.138	133	15	143	0	105	74	1.84957e-05
ENSG00000089280	FUS	chr16	+	31193833	31193985	31193833	31193955	31195181	31195323	447	23	1161	0	103	74	1.62986e-10	5.9395e-09	0.933	1	-0.067	447	23	723	0	103	74	1.06768e-08	2.84969e-07	0.933	1	-0.067	447	23	485	0	103	74	3.76438e-07	8.57759e-06	0.933	1	-0.067	447	23	724	0	103	74	1.05435e-08
ENSG00000167526	RPL13	chr16	+	89627347	89627776	89627347	89627471	89627985	89628159	927	147	636	0	147	74	0	0	0.76	1	-0.24	927	147	1147	97	147	74	4.30407e-06	8.07514e-05	0.76	0.856	-0.096	927	147	1402	126	147	74	1.02181e-05	0.000182878	0.76	0.849	-0.089	927	147	946	77	147	74	4.36962e-06
ENSG00000007237	GAS7	chr17	-	9828792	9828916	9828796	9828916	9822942	9823022	290	16	325	0	77	74	3.66387e-05	0.000615452	0.946	1	-0.054	290	16	345	0	77	74	2.63657e-05	0.000431992	0.946	1	-0.054	290	16	186	0	77	74	0.000646769	0.00739506	0.946	1	-0.054	290	16	214	0	77	74	0.000329035
ENSG00000010244	ZNF207	chr17	+	30696617	30696801	30696617	30696764	30697018	30697101	148	35	469	26	110	74	1.62418e-07	4.2826e-06	0.74	0.924	-0.184	148	35	593	34	110	74	8.69291e-08	2.03515e-06	0.74	0.921	-0.181	148	35	401	0	110	74	0	0	0.74	1	-0.26	148	35	336	29	110	74	0.000203614
ENSG00000108848	LUC7L3	chr17	+	48814320	48814387	48814320	48814353	48817666	48817706	123	31	388	0	107	74	0	0	0.733	1	-0.267	123	31	207	0	107	74	4.02567e-13	1.56182e-11	0.733	1	-0.267	123	31	134	0	107	74	4.4524e-10	1.42373e-08	0.733	1	-0.267	123	31	159	0	107	74	3.2696e-11
ENSG00000008294	SPAG9	chr17	-	49071124	49071296	49071144	49071296	49067810	49068029	430	57	791	0	93	74	0	0	0.857	1	-0.143	430	57	1162	0	93	74	0	0	0.857	1	-0.143	430	57	699	0	93	74	0	0	0.857	1	-0.143	430	57	821	0	93	74	0
ENSG00000108654	DDX5	chr17	-	62499547	62499689	62499562	62499689	62499305	62499466	971	85	2128	0	88	74	0	0	0.906	1	-0.094	971	85	1642	0	88	74	0	0	0.906	1	-0.094	971	85	1220	0	88	74	0	0	0.906	1	-0.094	971	85	1446	0	88	74	0
ENSG00000172809	RPL38	chr17	+	72200268	72200329	72200268	72200322	72205325	72205448	8707	494	7463	0	80	74	0	0	0.942	1	-0.058	8707	494	8684	0	80	74	0	0	0.942	1	-0.058	8707	494	9500	0	80	74	0	0	0.942	1	-0.058	8707	494	8140	0	80	74	0
ENSG00000178127	NDUFV2	chr18	+	9102627	9102795	9102627	9102722	9117835	9117901	207	15	327	0	146	74	1.05803e-06	2.37819e-05	0.875	1	-0.125	207	15	287	0	146	74	2.84258e-06	5.4653e-05	0.875	1	-0.125	207	15	128	0	146	74	0.000511845	0.00608442	0.875	1	-0.125	207	15	283	0	146	74	3.1549e-06
ENSG00000099622	CIRBP	chr19	+	1269346	1269409	1269346	1269364	1270926	1271035	1678	124	1048	0	118	74	0	0	0.895	1	-0.105	1678	124	1621	0	118	74	0	0	0.895	1	-0.105	1678	124	1457	0	118	74	0	0	0.895	1	-0.105	1678	124	1434	0	118	74	0
ENSG00000099622	CIRBP	chr19	+	1271138	1271466	1271138	1271245	1271549	1271631	45	5	102	0	147	74	0.00193923	0.0201624	0.819	1	-0.181	45	5	214	0	147	74	0.000171177	0.0022872	0.819	1	-0.181	45	5	106	0	147	74	0.00171445	0.0167593	0.819	1	-0.181	45	5	178	0	147	74	0.000312926
ENSG00000090339	ICAM1	chr19	+	10394804	10394996	10394804	10394983	10395078	10395333	6103	669	835	0	86	74	0	0	0.887	1	-0.113	6103	669	2562	0	86	74	0	0	0.887	1	-0.113	6103	669	598	0	86	74	0	0	0.887	1	-0.113	6103	669	1853	0	86	74	0
ENSG00000007080	CCDC124	chr19	+	18043831	18043857	18043831	18043849	18047218	18047801	106	12	250	0	81	74	1.58142e-06	3.49819e-05	0.89	1	-0.11	106	12	133	0	81	74	7.0608e-05	0.00105215	0.89	1	-0.11	106	12	113	0	81	74	0.000172398	0.0023899	0.89	1	-0.11	106	12	144	0	81	74	4.49408e-05
ENSG00000105220	GPI	chr19	+	34890460	34890532	34890460	34890504	34890623	34890690	274	38	193	0	101	74	3.64246e-09	1.14811e-07	0.841	1	-0.159	274	38	945	0	101	74	0	0	0.841	1	-0.159	274	38	414	0	101	74	9.21485e-15	4.3121e-13	0.841	1	-0.159	274	38	590	0	101	74	0
ENSG00000105220	GPI	chr19	+	34890460	34890540	34890460	34890504	34890623	34890690	802	38	584	0	109	74	1.22014e-08	3.60748e-07	0.935	1	-0.065	802	38	2407	0	109	74	0	0	0.935	1	-0.065	802	38	1090	0	109	74	2.70972e-12	1.07415e-10	0.935	1	-0.065	802	38	1421	0	109	74	5.67324e-14
ENSG00000105443	CYTH2	chr19	+	48978094	48978210	48978094	48978206	48981325	48981402	0	81	10	66	77	74	0.000327288	0.00436742	0	0.127	-0.127	0	81	13	60	77	74	1.98342e-05	0.000334044	0	0.172	-0.172	0	81	9	79	77	74	0.00155155	0.0154399	0	0.099	-0.099	0	81	13	50	77	74	5.90293e-06
ENSG00000115307	AUP1	chr2	-	74755066	74755133	74755075	74755133	74754862	74754965	321	18	540	0	82	74	6.39907e-07	1.53256e-05	0.941	1	-0.059	321	18	307	0	82	74	2.46305e-05	0.000405396	0.941	1	-0.059	321	18	303	0	82	74	2.67121e-05	0.000442573	0.941	1	-0.059	321	18	246	0	82	74	9.3031e-05
ENSG00000071054	MAP4K4	chr2	+	102456280	102456456	102456280	102456394	102459070	102459143	529	77	1048	41	135	74	1.62655e-11	6.51156e-10	0.79	0.933	-0.143	529	77	642	47	135	74	0.000339087	0.00419056	0.79	0.882	-0.092	529	77	490	41	135	74	0.00570681	0.0457257	0.79	0.868	-0.078	529	77	778	47	135	74	3.96756e-06
ENSG00000082258	CCNT2	chr2	+	135696571	135696632	135696571	135696598	135700181	135700244	15	4	95	0	107	74	0.000378865	0.00497698	0.722	1	-0.278	15	4	116	0	107	74	0.000210374	0.00274991	0.722	1	-0.278	15	4	53	0	107	74	0.0021653	0.020485	0.722	1	-0.278	15	4	68	0	107	74	0.00103122
ENSG00000055044	NOP58	chr2	+	203155045	203155180	203155045	203155103	203155847	203155993	132	6	497	0	147	74	0.000287026	0.0038869	0.917	1	-0.083	132	6	644	0	147	74	0.000165523	0.00222259	0.917	1	-0.083	132	6	447	0	147	74	0.000372634	0.00464243	0.917	1	-0.083	132	6	671	4	147	74	0.00244449
ENSG00000242372	EIF6	chr20	-	33871978	33872295	33872183	33872295	33868456	33868632	168	11	500	0	147	74	8.52221e-07	1.9475e-05	0.885	1	-0.115	168	11	226	0	147	74	8.32449e-05	0.00121381	0.885	1	-0.115	168	11	175	0	147	74	0.000314275	0.00403054	0.885	1	-0.115	168	11	187	1	147	74	0.00155759
ENSG00000125991	ERGIC3	chr20	+	34144964	34145020	34144964	34144987	34145195	34145317	1012	75	978	0	106	74	0	0	0.904	1	-0.096	1012	75	999	0	106	74	0	0	0.904	1	-0.096	1012	75	1300	0	106	74	0	0	0.904	1	-0.096	1012	75	875	0	106	74	0
ENSG00000142173	COL6A2	chr21	+	47533921	47533987	47533921	47533953	47535785	47535839	6730	421	6086	0	107	74	0	0	0.917	1	-0.083	6730	421	6711	0	107	74	0	0	0.917	1	-0.083	6730	421	8905	0	107	74	0	0	0.917	1	-0.083	6730	421	5275	0	107	74	0
ENSG00000100243	CYB5R3	chr22	-	43027383	43027456	43027418	43027456	43026887	43026994	574	52	702	0	108	74	0	0	0.883	1	-0.117	574	52	605	0	108	74	1.55431e-15	6.56984e-14	0.883	1	-0.117	574	52	368	0	108	74	3.24356e-11	1.17215e-09	0.883	1	-0.117	574	52	385	0	108	74	1.45018e-11
ENSG00000134070	IRAK2	chr3	+	10276142	10276343	10276142	10276321	10280431	10280723	567	28	179	0	95	74	0.000564785	0.00707206	0.94	1	-0.06	567	28	560	0	95	74	8.59281e-08	2.02481e-06	0.94	1	-0.06	567	28	198	0	95	74	0.000315859	0.00404544	0.94	1	-0.06	567	28	240	0	95	74	9.38385e-05
ENSG00000169908	TM4SF1	chr3	-	149093225	149093335	149093242	149093335	149089558	149089654	63	169	11	0	90	74	8.75012e-07	1.99129e-05	0.235	1	-0.765	63	169	52	0	90	74	0	0	0.235	1	-0.765	63	169	55	0	90	74	0	0	0.235	1	-0.765	63	169	47	0	90	74	0
ENSG00000068078	FGFR3	chr4	+	1803590	1803752	1803590	1803713	1805418	1805563	78	6	1300	20	112	74	0.00404122	0.0366046	0.896	0.977	-0.081	78	6	400	5	112	74	0.00502564	0.0414529	0.896	0.981	-0.085	78	6	101	0	112	74	0.00504462	0.0416105	0.896	1	-0.104	78	6	179	0	112	74	0.000843231
ENSG00000078140	UBE2K	chr4	+	39699795	39700010	39699795	39699992	39739039	39739133	187	24	691	0	91	74	9.76996e-15	4.67977e-13	0.864	1	-0.136	187	24	314	0	91	74	3.04714e-10	9.45745e-09	0.864	1	-0.136	187	24	210	0	91	74	3.41401e-08	9.04714e-07	0.864	1	-0.136	187	24	259	0	91	74	3.14178e-09
ENSG00000118762	PKD2	chr4	+	88977237	88977419	88977237	88977415	88979134	88979255	61	15	372	0	77	74	4.72755e-12	1.95685e-10	0.796	1	-0.204	61	15	80	0	77	74	5.304e-06	9.86598e-05	0.796	1	-0.204	61	15	106	0	77	74	5.50065e-07	1.22148e-05	0.796	1	-0.204	61	15	143	0	77	74	3.99185e-08
ENSG00000109332	UBE2D3	chr4	-	103722610	103723795	103723717	103723795	103720563	103720657	251	9	299	0	147	74	0.00113574	0.0128964	0.934	1	-0.066	251	9	419	0	147	74	0.000325774	0.00406301	0.934	1	-0.066	251	9	288	0	147	74	0.00130083	0.0133179	0.934	1	-0.066	251	9	288	0	147	74	0.00130083
ENSG00000138685	FGF2	chr4	+	123747862	123748507	123747862	123747884	123797475	123797579	202	20	138	0	147	74	2.4347e-05	0.000425936	0.836	1	-0.164	202	20	207	0	147	74	8.12708e-07	1.67841e-05	0.836	1	-0.164	202	20	180	0	147	74	2.82549e-06	5.7063e-05	0.836	1	-0.164	202	20	258	0	147	74	9.79683e-08
ENSG00000129116	PALLD	chr4	+	169812072	169812208	169812072	169812204	169815729	169815828	256	38	174	0	77	74	8.27387e-09	2.51402e-07	0.866	1	-0.134	256	38	288	0	77	74	3.81728e-12	1.35072e-10	0.866	1	-0.134	256	38	270	0	77	74	1.12776e-11	4.27762e-10	0.866	1	-0.134	256	38	204	0	77	74	8.90917e-10
ENSG00000062194	GPBP1	chr5	+	56531792	56531859	56531792	56531850	56542126	56542180	250	34	285	0	82	74	4.13197e-11	1.5959e-09	0.869	1	-0.131	250	34	347	2	82	74	7.38593e-11	2.37377e-09	0.869	0.994	-0.125	250	34	195	2	82	74	6.32474e-07	1.39479e-05	0.869	0.989	-0.12	250	34	240	2	82	74	3.19728e-08
ENSG00000069020	MAST4	chr5	+	66300482	66300703	66300482	66300519	66300779	66300913	13	67	12	7	147	74	9.16825e-05	0.0014026	0.089	0.463	-0.374	13	67	50	61	147	74	2.06001e-05	0.000346407	0.089	0.292	-0.203	13	67	25	33	147	74	0.000563825	0.00657202	0.089	0.276	-0.187	13	67	41	57	147	74	0.000182704
ENSG00000069020	MAST4	chr5	+	66350231	66350327	66350231	66350320	66385996	66386059	6	6	13	0	80	74	0.0031658	0.0300916	0.481	1	-0.519	6	6	39	0	80	74	3.035e-05	0.000491344	0.481	1	-0.519	6	6	18	0	80	74	0.000925796	0.0100013	0.481	1	-0.519	6	6	59	0	80	74	4.04396e-06
ENSG00000153113	CAST	chr5	+	96077197	96077284	96077197	96077275	96078358	96078460	96	8	115	0	82	74	0.00179662	0.0189128	0.915	1	-0.085	96	8	125	0	82	74	0.00133257	0.0137341	0.915	1	-0.085	96	8	94	0	82	74	0.0036046	0.0316367	0.915	1	-0.085	96	8	104	0	82	74	0.00255511
ENSG00000131435	PDLIM4	chr5	+	131606995	131607159	131606995	131607135	131607483	131607601	1239	142	589	0	97	74	0	0	0.869	1	-0.131	1239	142	1410	0	97	74	0	0	0.869	1	-0.131	1239	142	849	0	97	74	0	0	0.869	1	-0.131	1239	142	1012	0	97	74	0
ENSG00000113649	TCERG1	chr5	+	145862154	145862371	145862154	145862290	145863102	145863192	11	74	103	144	147	74	3.99885e-07	9.92385e-06	0.07	0.265	-0.195	11	74	105	150	147	74	5.51524e-07	1.16561e-05	0.07	0.261	-0.191	11	74	59	86	147	74	4.8308e-06	9.24987e-05	0.07	0.257	-0.187	11	74	72	156	147	74	0.000529706
ENSG00000113328	CCNG1	chr5	+	162868183	162868337	162868183	162868251	162868891	162868970	418	12	384	0	147	74	0.000771143	0.00922429	0.946	1	-0.054	418	12	450	0	147	74	0.00040078	0.00481068	0.946	1	-0.054	418	12	358	0	147	74	0.00102252	0.0108748	0.946	1	-0.054	418	12	357	0	147	74	0.00103399
ENSG00000197451	HNRNPAB	chr5	+	177631507	177631741	177631507	177631574	177631815	177632047	88	7	614	0	147	74	3.00034e-06	6.26871e-05	0.864	1	-0.136	88	7	127	0	147	74	0.00137702	0.0140325	0.864	1	-0.136	88	7	169	0	147	74	0.00045535	0.00550148	0.864	1	-0.136	88	7	148	0	147	74	0.000767717
ENSG00000198721	ECI2	chr6	-	4125483	4126471	4126368	4126471	4119419	4119509	80	27	151	0	147	74	2.97184e-12	1.25378e-10	0.599	1	-0.401	80	27	75	0	147	74	6.1254e-08	1.47213e-06	0.599	1	-0.401	80	27	54	0	147	74	2.28963e-06	4.68109e-05	0.599	1	-0.401	80	27	92	0	147	74	4.58875e-09
ENSG00000204520	MICA	chr6	+	31378319	31378574	31378319	31378393	31378985	31379136	141	6	288	0	147	74	0.00163553	0.017484	0.922	1	-0.078	141	6	221	0	147	74	0.00343614	0.0302233	0.922	1	-0.078	141	6	205	0	147	74	0.00423558	0.0360212	0.922	1	-0.078	141	6	197	0	147	74	0.00472845
ENSG00000204344	STK19	chr6	+	31940397	31940696	31940397	31940534	31946679	31946775	4	161	17	100	147	74	0.000139954	0.00205489	0.012	0.079	-0.067	4	161	22	123	147	74	3.44253e-05	0.000547529	0.012	0.083	-0.071	4	161	15	110	147	74	0.00110942	0.0116952	0.012	0.064	-0.052	4	161	20	135	147	74	0.000263908
ENSG00000112511	PHF1	chr6	+	33381185	33381418	33381185	33381334	33381512	33381608	33	143	58	110	147	74	0.000919409	0.0106607	0.104	0.21	-0.106	33	143	145	125	147	74	4.54081e-14	1.86139e-12	0.104	0.369	-0.265	33	143	97	108	147	74	2.7802e-09	8.05755e-08	0.104	0.311	-0.207	33	143	53	75	147	74	1.72029e-05
ENSG00000146197	SCUBE3	chr6	+	35210398	35210557	35210398	35210535	35210797	35211013	190	20	2005	16	95	74	2.37832e-12	1.01509e-10	0.881	0.99	-0.109	190	20	423	13	95	74	0.000734191	0.00813828	0.881	0.962	-0.081	190	20	122	0	95	74	4.84192e-05	0.000758963	0.881	1	-0.119	190	20	401	0	95	74	1.1005e-09
ENSG00000198755	RPL10A	chr6	+	35436196	35436650	35436196	35436216	35436723	35436794	346	283	333	0	147	74	0	0	0.381	1	-0.619	346	283	402	214	147	74	0.000224228	0.00290667	0.381	0.486	-0.105	346	283	739	0	147	74	0	0	0.381	1	-0.619	346	283	492	0	147	74	0
ENSG00000112280	COL9A1	chr6	-	71009745	71009878	71009792	71009878	71003869	71004028	40	22	150	0	120	74	5.06262e-14	2.34312e-12	0.529	1	-0.471	40	22	115	0	120	74	2.9825e-12	1.05879e-10	0.529	1	-0.471	40	22	75	0	120	74	1.16685e-09	3.56482e-08	0.529	1	-0.471	40	22	77	0	120	74	8.27256e-10
ENSG00000111799	COL12A1	chr6	-	75814921	75815008	75814951	75815008	75813472	75813526	618	91	746	0	103	74	0	0	0.83	1	-0.17	618	91	931	0	103	74	0	0	0.83	1	-0.17	618	91	2391	0	103	74	0	0	0.83	1	-0.17	618	91	299	0	103	74	2.66454e-15
ENSG00000198729	PPP1R14C	chr6	+	150535879	150535967	150535879	150535963	150537963	150537992	0	27	20	0	77	74	9.09273e-14	4.13851e-12	0	1	-1	0	27	19	0	77	74	2.12164e-13	8.35048e-12	0	1	-1	0	27	13	0	77	74	7.04881e-11	2.45888e-09	0	1	-1	0	27	27	0	77	74	4.44089e-16
ENSG00000112110	MRPL18	chr6	+	160218318	160218401	160218318	160218379	160219083	160219468	7	11	40	2	95	74	4.35408e-06	8.92708e-05	0.331	0.94	-0.609	7	11	28	4	95	74	0.000499219	0.00588818	0.331	0.845	-0.514	7	11	15	0	95	74	0.000102054	0.00151783	0.331	1	-0.669	7	11	39	8	95	74	0.0009052
ENSG00000112110	MRPL18	chr6	+	160218318	160218550	160218318	160218379	160219083	160219468	157	11	587	2	147	74	2.05215e-06	4.44862e-05	0.878	0.993	-0.115	157	11	280	4	147	74	0.00433333	0.0364907	0.878	0.972	-0.094	157	11	232	0	147	74	4.72087e-05	0.000743633	0.878	1	-0.122	157	11	528	8	147	74	0.00144441
ENSG00000049540	ELN	chr7	+	73466079	73466169	73466079	73466160	73466253	73466313	524	28	326	0	82	74	6.66432e-06	0.000131005	0.944	1	-0.056	524	28	826	0	82	74	1.3384e-09	3.95081e-08	0.944	1	-0.056	524	28	1325	0	82	74	1.85896e-11	6.91201e-10	0.944	1	-0.056	524	28	483	0	82	74	2.27649e-07
ENSG00000049540	ELN	chr7	+	73467495	73467639	73467495	73467570	73469045	73469099	1259	139	750	0	142	74	0	0	0.825	1	-0.175	1259	139	2218	0	142	74	0	0	0.825	1	-0.175	1259	139	3353	0	142	74	0	0	0.825	1	-0.175	1259	139	1161	0	142	74	0
ENSG00000164692	COL1A2	chr7	+	94034984	94035038	94034984	94035030	94035561	94035615	3896	228	2810	0	81	74	0	0	0.94	1	-0.06	3896	228	5310	0	81	74	0	0	0.94	1	-0.06	3896	228	16125	0	81	74	0	0	0.94	1	-0.06	3896	228	1531	0	81	74	0
ENSG00000164692	COL1A2	chr7	+	94043205	94043259	94043205	94043251	94043533	94043587	4313	286	2386	0	81	74	0	0	0.932	1	-0.068	4313	286	4736	0	81	74	0	0	0.932	1	-0.068	4313	286	12152	0	81	74	0	0	0.932	1	-0.068	4313	286	1389	0	81	74	0
ENSG00000197157	SND1	chr7	+	127726989	127727103	127726989	127727091	127729540	127729714	904	46	947	0	85	74	4.76819e-12	1.96625e-10	0.945	1	-0.055	904	46	1121	0	85	74	3.53828e-13	1.3826e-11	0.945	1	-0.055	904	46	889	0	85	74	1.23875e-11	4.64194e-10	0.945	1	-0.055	904	46	798	0	85	74	6.12076e-11
ENSG00000128591	FLNC	chr7	+	128482284	128482428	128482284	128482314	128482628	128482752	88	7	488	0	147	74	6.53461e-06	0.000128686	0.864	1	-0.136	88	7	550	0	147	74	4.29811e-06	8.07514e-05	0.864	1	-0.136	88	7	293	0	147	74	4.80744e-05	0.000754791	0.864	1	-0.136	88	7	735	0	147	74	1.78314e-06
ENSG00000182158	CREB3L2	chr7	-	137612895	137613112	137613069	137613112	137600582	137600758	43	13	75	0	147	74	3.38701e-06	7.00984e-05	0.625	1	-0.375	43	13	100	0	147	74	3.23101e-07	7.10495e-06	0.625	1	-0.375	43	13	186	0	147	74	1.1259e-09	3.45073e-08	0.625	1	-0.375	43	13	149	0	147	74	9.17653e-09
ENSG00000104723	TUSC3	chr8	+	15601046	15601121	15601046	15601087	15605883	15605974	193	32	568	0	107	74	0	0	0.807	1	-0.193	193	32	328	0	107	74	1.25677e-13	5.03776e-12	0.807	1	-0.193	193	32	339	0	107	74	7.01661e-14	3.14534e-12	0.807	1	-0.193	193	32	320	0	107	74	1.93734e-13
ENSG00000147454	SLC25A37	chr8	+	23424195	23424453	23424195	23424289	23425834	23425891	480	39	209	0	147	74	7.83689e-07	1.80974e-05	0.861	1	-0.139	480	39	617	0	147	74	8.22675e-14	3.3222e-12	0.861	1	-0.139	480	39	440	0	147	74	3.15531e-11	1.14655e-09	0.861	1	-0.139	480	39	695	0	147	74	8.43769e-15
ENSG00000147454	SLC25A37	chr8	+	23424195	23424453	23424195	23424426	23425834	23425891	158	41	72	4	100	74	0.00090962	0.0105807	0.74	0.93	-0.19	158	41	188	19	100	74	0.00114776	0.0120348	0.74	0.88	-0.14	158	41	150	6	100	74	1.06797e-06	2.28176e-05	0.74	0.949	-0.209	158	41	205	7	100	74	1.66398e-08
ENSG00000147454	SLC25A37	chr8	+	23424288	23424478	23424288	23424426	23425834	23425891	282	41	159	4	125	74	5.99805e-05	0.000949389	0.803	0.959	-0.156	282	41	457	19	125	74	6.25344e-06	0.000115333	0.803	0.934	-0.131	282	41	352	6	125	74	3.88439e-09	1.10245e-07	0.803	0.972	-0.169	282	41	499	7	125	74	9.50129e-12
ENSG00000156482	RPL30	chr8	-	99057170	99057627	99057574	99057627	99054872	99055003	10403	5142	5803	1238	147	74	0	0	0.505	0.702	-0.197	10403	5142	8262	1498	147	74	0	0	0.505	0.735	-0.23	10403	5142	9392	2275	147	74	0	0	0.505	0.675	-0.17	10403	5142	7090	1859	147	74	0
ENSG00000187955	COL14A1	chr8	+	121354618	121354685	121354618	121354651	121357613	121357802	1981	167	1072	0	107	74	0	0	0.891	1	-0.109	1981	167	1724	0	107	74	0	0	0.891	1	-0.109	1981	167	3676	0	107	74	0	0	0.891	1	-0.109	1981	167	1835	0	107	74	0
ENSG00000104529	EEF1D	chr8	-	144663398	144663498	144663455	144663498	144663223	144663324	736	162	477	40	130	74	3.05242e-08	8.74205e-07	0.721	0.872	-0.151	736	162	719	88	130	74	2.88656e-05	0.00046801	0.721	0.823	-0.102	736	162	716	92	130	74	0.000107802	0.0015861	0.721	0.816	-0.095	736	162	552	76	130	74	0.00149618
ENSG00000106991	ENG	chr9	-	130578221	130578332	130578241	130578332	130577290	130578085	132	17	826	0	93	74	6.44707e-13	2.78417e-11	0.861	1	-0.139	132	17	210	0	93	74	1.99364e-07	4.51186e-06	0.861	1	-0.139	132	17	87	0	93	74	0.000157923	0.00221484	0.861	1	-0.139	132	17	115	0	93	74	2.47393e-05
ENSG00000106991	ENG	chr9	-	130579427	130579482	130579432	130579482	130578221	130578332	127	10	816	0	78	74	1.22625e-06	2.73946e-05	0.923	1	-0.077	127	10	200	0	78	74	0.000158621	0.00213784	0.923	1	-0.077	127	10	129	0	78	74	0.00102094	0.0108701	0.923	1	-0.077	127	10	113	0	78	74	0.00172295
ENSG00000130635	COL5A1	chr9	+	137642387	137642462	137642387	137642428	137642635	137642728	536	23	426	0	107	74	6.92084e-06	0.000135562	0.942	1	-0.058	536	23	599	0	107	74	4.83356e-07	1.02955e-05	0.942	1	-0.058	536	23	1375	0	107	74	6.16533e-10	1.93281e-08	0.942	1	-0.058	536	23	370	0	107	74	1.91794e-05
ENSG00000130635	COL5A1	chr9	+	137677840	137677894	137677840	137677860	137681000	137681054	588	51	535	0	107	74	7.67164e-14	3.50626e-12	0.889	1	-0.111	588	51	824	0	107	74	0	0	0.889	1	-0.111	588	51	1805	0	107	74	0	0	0.889	1	-0.111	588	51	474	0	107	74	8.46434e-13
ENSG00000179222	MAGED1	chrX	+	51641706	51641739	51641706	51641724	51643277	51643392	319	23	1171	0	88	74	2.12586e-12	9.10879e-11	0.921	1	-0.079	319	23	457	0	88	74	1.7222e-08	4.50801e-07	0.921	1	-0.079	319	23	381	0	88	74	9.86185e-08	2.45889e-06	0.921	1	-0.079	319	23	502	0	88	74	6.83886e-09
ENSG00000184634	MED12	chrX	+	70344825	70344996	70344825	70344897	70345200	70345345	65	7	235	0	147	74	2.61461e-05	0.000451647	0.824	1	-0.176	65	7	173	0	147	74	0.000102763	0.00146883	0.824	1	-0.176	65	7	72	0	147	74	0.00361208	0.0316607	0.824	1	-0.176	65	7	109	0	147	74	0.000737894
ENSG00000147162	OGT	chrX	+	70764416	70767873	70764416	70764485	70774362	70774442	170	7	536	0	147	74	0.000185809	0.0026435	0.924	1	-0.076	170	7	591	0	147	74	0.000143023	0.00195675	0.924	1	-0.076	170	7	304	0	147	74	0.00104476	0.0110745	0.924	1	-0.076	170	7	473	0	147	74	0.000265438
ENSG00000123572	NRK	chrX	+	105168686	105169023	105168686	105168895	105178249	105178436	68	7	573	13	147	74	0.00503666	0.0438817	0.83	0.957	-0.127	68	7	148	0	147	74	0.000249574	0.00320086	0.83	1	-0.17	68	7	137	0	147	74	0.000346305	0.00434261	0.83	1	-0.17	68	7	189	0	147	74	8.63021e-05
ENSG00000147403	RPL10	chrX	+	153627678	153627935	153627678	153627737	153628143	153628282	103	53	207	0	147	74	0	0	0.495	1	-0.505	103	53	241	36	147	74	3.97819e-07	8.59147e-06	0.495	0.771	-0.276	103	53	211	55	147	74	0.00290711	0.026384	0.495	0.659	-0.164	103	53	136	0	147	74	0
ENSG00000142798	HSPG2	chr1	-	22168067	22168166	22168100	22168166	22167593	22167778	17	60	0	73	106	74	3.00902e-06	6.2749e-05	0.165	0	0.165	17	60	0	122	106	74	3.26034e-08	8.21741e-07	0.165	0	0.165	17	60	0	76	106	74	2.16753e-06	4.45248e-05	0.165	0	0.165	17	60	0	66	106	74	6.68813e-06
ENSG00000131795	RBM8A	chr1	+	145507597	145507771	145507597	145507733	145508015	145508075	19	0	2	11	111	74	4.2764e-07	1.05174e-05	1	0.108	0.892	19	0	16	11	111	74	0.000577358	0.00666345	1	0.492	0.508	19	0	14	16	111	74	2.62768e-05	0.000436113	1	0.368	0.632	19	0	4	9	111	74	1.67878e-05
ENSG00000165678	GHITM	chr10	+	85899195	85899349	85899195	85899333	85901217	85901385	427	0	491	44	89	74	1.4469e-11	5.81356e-10	1	0.903	0.097	427	0	322	25	89	74	7.01483e-09	1.9003e-07	1	0.915	0.085	427	0	252	19	89	74	6.47307e-08	1.64711e-06	1	0.917	0.083	427	0	326	26	89	74	3.70032e-09
ENSG00000095564	BTAF1	chr10	+	93718821	93719039	93718821	93718911	93719541	93719637	247	23	109	94	147	74	0	0	0.844	0.369	0.475	247	23	533	209	147	74	1.74016e-12	6.32221e-11	0.844	0.562	0.282	247	23	343	144	147	74	1.64002e-12	6.63828e-11	0.844	0.545	0.299	247	23	376	126	147	74	5.02144e-09
ENSG00000060138	YBX3	chr12	-	10862506	10865932	10865809	10865932	10856653	10856747	866	848	470	624	147	74	9.23185e-05	0.0014084	0.34	0.275	0.065	866	848	767	994	147	74	3.96953e-05	0.00062676	0.34	0.28	0.06	866	848	535	820	147	74	1.05811e-09	3.25336e-08	0.34	0.247	0.093	866	848	412	638	147	74	7.33204e-09
ENSG00000213782	DDX47	chr12	+	12976136	12976950	12976136	12976253	12977473	12977611	269	0	289	15	147	74	5.84857e-05	0.000931103	1	0.907	0.093	269	0	597	43	147	74	1.46057e-07	3.36149e-06	1	0.875	0.125	269	0	498	52	147	74	3.32298e-10	1.09544e-08	1	0.828	0.172	269	0	385	26	147	74	1.25792e-06
ENSG00000075415	SLC25A3	chr12	+	98987752	98989626	98987752	98987913	98991633	98991813	1808	10	1752	157	147	74	0	0	0.989	0.849	0.14	1808	10	2165	194	147	74	0	0	0.989	0.849	0.14	1808	10	2136	177	147	74	0	0	0.989	0.859	0.13	1808	10	1624	104	147	74	0
ENSG00000089157	RPLP0	chr12	-	120638521	120638634	120638532	120638634	120637112	120637288	174	248	111	348	84	74	6.46466e-08	1.79977e-06	0.382	0.219	0.163	174	248	222	461	84	74	0.00346059	0.0303409	0.382	0.298	0.084	174	248	256	547	84	74	0.0012145	0.0126198	0.382	0.292	0.09	174	248	162	459	84	74	3.30188e-07
ENSG00000140416	TPM1	chr15	+	63335904	63336351	63335904	63336030	63349183	63349317	698	13	239	49	147	74	0	0	0.964	0.711	0.253	698	13	95	21	147	74	4.43332e-11	1.43759e-09	0.964	0.695	0.269	698	13	96	12	147	74	1.99055e-05	0.000337374	0.964	0.801	0.163	698	13	72	15	147	74	1.38144e-08
ENSG00000179335	CLK3	chr15	+	74912349	74914557	74912349	74912566	74914834	74914901	298	4	215	28	147	74	2.28304e-07	5.90473e-06	0.974	0.794	0.18	298	4	594	29	147	74	0.00605332	0.0481385	0.974	0.912	0.062	298	4	405	39	147	74	3.16906e-06	6.33349e-05	0.974	0.839	0.135	298	4	265	36	147	74	2.88281e-08
ENSG00000041357	PSMA4	chr15	+	78834518	78834987	78834518	78834561	78836531	78836609	128	0	542	27	147	74	0.00218744	0.0221143	1	0.91	0.09	128	0	113	9	147	74	0.000781579	0.00855876	1	0.863	0.137	128	0	96	8	147	74	0.000820829	0.00898882	1	0.858	0.142	128	0	138	15	147	74	4.25646e-05
ENSG00000131899	LLGL1	chr17	+	18140148	18141087	18140148	18140253	18141380	18141528	51	0	87	18	147	74	0.000243574	0.00334603	1	0.709	0.291	51	0	61	11	147	74	0.00103476	0.0110202	1	0.736	0.264	51	0	53	17	147	74	1.8681e-05	0.000317743	1	0.611	0.389	51	0	27	10	147	74	4.28607e-05
ENSG00000108296	CWC25	chr17	-	36966528	36966848	36966720	36966848	36965954	36966018	43	12	22	66	147	74	3.17169e-10	1.11866e-08	0.643	0.144	0.499	43	12	70	61	147	74	0.00134172	0.0138022	0.643	0.366	0.277	43	12	33	32	147	74	0.00186771	0.018007	0.643	0.342	0.301	43	12	51	87	147	74	1.63755e-07
ENSG00000141756	FKBP10	chr17	+	39974340	39974530	39974340	39974420	39974633	39974779	1063	0	1730	98	147	74	0	0	1	0.899	0.101	1063	0	1908	124	147	74	0	0	1	0.886	0.114	1063	0	2479	120	147	74	0	0	1	0.912	0.088	1063	0	1399	71	147	74	2.22045e-16
ENSG00000108654	DDX5	chr17	-	62496666	62498187	62498127	62498187	62495733	62496444	1353	49	2875	227	147	74	2.16412e-07	5.61188e-06	0.933	0.864	0.069	1353	49	1309	153	147	74	9.73666e-14	3.91738e-12	0.933	0.812	0.121	1353	49	1093	123	147	74	6.62959e-12	2.5439e-10	0.933	0.817	0.116	1353	49	1491	261	147	74	0
ENSG00000105135	ILVBL	chr19	-	15226811	15227132	15226962	15227132	15226660	15226732	91	0	99	11	147	74	0.00054233	0.00682204	1	0.819	0.181	91	0	128	11	147	74	0.00177928	0.0173037	1	0.854	0.146	91	0	96	13	147	74	0.000134923	0.0019376	1	0.788	0.212	91	0	92	10	147	74	0.000719851
ENSG00000126457	PRMT1	chr19	+	50183451	50183510	50183451	50183495	50183743	50183845	25	4	11	17	88	74	0.000238064	0.00328468	0.84	0.352	0.488	25	4	10	23	88	74	7.1536e-06	0.000129732	0.84	0.268	0.572	25	4	14	13	88	74	0.00566167	0.0454877	0.84	0.475	0.365	25	4	14	18	88	74	0.000528179
ENSG00000105568	PPP2R1A	chr19	+	52719031	52719146	52719031	52719115	52719256	52719327	525	0	1062	47	104	74	6.54754e-08	1.81823e-06	1	0.941	0.059	525	0	600	27	104	74	4.37133e-07	9.36604e-06	1	0.941	0.059	525	0	478	30	104	74	2.51142e-09	7.41295e-08	1	0.919	0.081	525	0	535	28	104	74	5.1294e-08
ENSG00000061676	NCKAP1	chr2	-	183817840	183818059	183817986	183818059	183817520	183817651	244	0	625	26	147	74	0.000189745	0.002696	1	0.924	0.076	244	0	424	24	147	74	1.88252e-05	0.000317544	1	0.899	0.101	244	0	289	18	147	74	1.71838e-05	0.000294892	1	0.89	0.11	244	0	371	33	147	74	7.33899e-08
ENSG00000214078	CPNE1	chr20	-	34220084	34220307	34220232	34220307	34219866	34219947	285	38	429	107	147	74	0.00156979	0.0169145	0.791	0.669	0.122	285	38	283	94	147	74	6.91279e-06	0.000126208	0.791	0.602	0.189	285	38	124	37	147	74	0.00178997	0.0173622	0.791	0.628	0.163	285	38	164	44	147	74	0.0040298
ENSG00000072682	P4HA2	chr5	-	131533898	131534133	131534013	131534133	131531104	131531173	101	154	14	79	147	74	7.14386e-06	0.000139185	0.248	0.082	0.166	101	154	140	597	147	74	1.65449e-10	5.22463e-09	0.248	0.106	0.142	101	154	92	300	147	74	1.38984e-05	0.000242855	0.248	0.134	0.114	101	154	92	513	147	74	3.66374e-14
ENSG00000164587	RPS14	chr5	-	149825171	149825248	149825179	149825248	149823793	149823914	12	0	47	34	81	74	0.0015958	0.0171443	1	0.558	0.442	12	0	5	57	81	74	2.37885e-10	7.46864e-09	1	0.074	0.926	12	0	2	68	81	74	1.06526e-12	4.40475e-11	1	0.026	0.974	12	0	1	53	81	74	2.48368e-12
ENSG00000164587	RPS14	chr5	-	149827151	149827298	149827236	149827298	149826364	149826526	219	3	0	13	147	74	0	0	0.974	0	0.974	219	3	133	17	147	74	2.87288e-05	0.000466489	0.974	0.798	0.176	219	3	0	21	147	74	0	0	0.974	0	0.974	219	3	0	10	147	74	4.32987e-15
ENSG00000243649	CFB	chr6	+	31918062	31918549	31918062	31918180	31918920	31919021	127	23	22	27	147	74	1.31424e-07	3.50753e-06	0.735	0.291	0.444	127	23	51	26	147	74	0.00190941	0.0184701	0.735	0.497	0.238	127	23	7	13	147	74	6.56066e-06	0.00012197	0.735	0.213	0.522	127	23	9	8	147	74	0.00506296
ENSG00000112511	PHF1	chr6	+	33382501	33382921	33382501	33382606	33383011	33383106	320	0	123	15	147	74	9.11455e-09	2.74664e-07	1	0.805	0.195	320	0	355	37	147	74	1.07603e-10	3.4178e-09	1	0.828	0.172	320	0	245	41	147	74	7.54952e-15	3.55012e-13	1	0.751	0.249	320	0	192	19	147	74	1.47405e-08
ENSG00000112280	COL9A1	chr6	-	70966470	70966524	70966495	70966524	70965039	70965083	212	1845	0	1997	98	74	0	0	0.08	0	0.08	212	1845	0	2570	98	74	0	0	0.08	0	0.08	212	1845	0	2155	98	74	0	0	0.08	0	0.08	212	1845	0	2687	98	74	0
ENSG00000106624	AEBP1	chr7	+	44150511	44150656	44150511	44150634	44150752	44150838	860	0	1012	62	95	74	6.99441e-15	3.37981e-13	1	0.927	0.073	860	0	1084	73	95	74	1.11022e-16	4.78585e-15	1	0.92	0.08	860	0	1047	65	95	74	3.10862e-15	1.49105e-13	1	0.926	0.074	860	0	856	56	95	74	3.21965e-15
[truncated: 4 more columns]

## Sheet: A3SS
GeneID	geneSymbol	chr	strand	longExonStart_0base	longExonEnd	shortES	shortEE	flankingES	flankingEE	IJC_SAMPLE_1 (R08-269A vs. 14 week control)	SJC_SAMPLE_1 (R08-269A vs. 14 week control)	IJC_SAMPLE_2 (R08-269A vs. 14 week control)	SJC_SAMPLE_2 (R08-269A vs. 14 week control)	IncFormLen (R08-269A vs. 14 week control)	SkipFormLen (R08-269A vs. 14 week control)	PValue (R08-269A vs. 14 week control)	FDR (R08-269A vs. 14 week control)	IncLevel1 (R08-269A vs. 14 week control)	IncLevel2 (R08-269A vs. 14 week control)	IncLevelDifference (R08-269A vs. 14 week control)	IJC_SAMPLE_1 (R08-269A vs. 14 week control)	SJC_SAMPLE_1 (R08-269A vs. 14 week control)	IJC_SAMPLE_2 (R08-269A vs. 14 week control)	SJC_SAMPLE_2 (R08-269A vs. 14 week control)	IncFormLen (R08-269A vs. 14 week control)	SkipFormLen (R08-269A vs. 14 week control)	PValue (R08-269A vs. 14 week control)	FDR (R08-269A vs. 14 week control)	IncLevel1 (R08-269A vs. 14 week control)	IncLevel2 (R08-269A vs. 14 week control)	IncLevelDifference (R08-269A vs. 14 week control)	IJC_SAMPLE_1 (R08-269A vs. 15 week control)	SJC_SAMPLE_1 (R08-269A vs. 15 week control)	IJC_SAMPLE_2 (R08-269A vs. 15 week control)	SJC_SAMPLE_2 (R08-269A vs. 15 week control)	IncFormLen (R08-269A vs. 15 week control)	SkipFormLen (R08-269A vs. 15 week control)	PValue (R08-269A vs. 15 week control)	FDR (R08-269A vs. 15 week control)	IncLevel1 (R08-269A vs. 15 week control)	IncLevel2 (R08-269A vs. 15 week control)	IncLevelDifference (R08-269A vs. 15 week control)	IJC_SAMPLE_1 (R08-269A vs. 18 week control)	SJC_SAMPLE_1 (R08-269A vs. 18 week control)	IJC_SAMPLE_2 (R08-269A vs. 18 week control)	SJC_SAMPLE_2 (R08-269A vs. 18 week control)	IncFormLen (R08-269A vs. 18 week control)	SkipFormLen (R08-269A vs. 18 week control)	PValue (R08-269A vs. 18 week control)
ENSG00000116786	PLEKHM2	chr1	+	16058844	16059024	16058965	16059024	16058444	16058543	209	11	177	0	147	74	0.000936519	0.00981777	0.905	1	-0.095	209	11	193	0	147	74	0.000634633	0.00663622	0.905	1	-0.095	209	11	174	0	147	74	0.00100978	0.00999302	0.905	1	-0.095	209	11	135	0	147	74	0.00290189
ENSG00000244038	DDOST	chr1	-	20979343	20979464	20979343	20979461	20980119	20980267	584	31	1111	0	76	74	5.81001e-11	2.16547e-09	0.948	1	-0.052	584	31	673	0	76	74	8.48638e-09	2.32299e-07	0.948	1	-0.052	584	31	747	0	76	74	2.95998e-09	8.35955e-08	0.948	1	-0.052	584	31	482	0	76	74	2.22168e-07
ENSG00000244038	DDOST	chr1	-	20979343	20979520	20979343	20979461	20980119	20980267	570	31	1050	0	132	74	7.81264e-13	3.427e-11	0.912	1	-0.088	570	31	655	0	132	74	5.05025e-10	1.59172e-08	0.912	1	-0.088	570	31	691	0	132	74	2.50784e-10	8.04051e-09	0.912	1	-0.088	570	31	462	0	132	74	3.60322e-08
ENSG00000117308	GALE	chr1	-	24125104	24125220	24125104	24125217	24125376	24125502	119	12	275	0	76	74	2.59765e-06	5.28802e-05	0.906	1	-0.094	119	12	199	0	76	74	1.69132e-05	0.000266298	0.906	1	-0.094	119	12	58	0	76	74	0.00614262	0.0435664	0.906	1	-0.094	119	12	193	0	76	74	2.01391e-05
ENSG00000133226	SRRM1	chr1	+	24978924	24979119	24978962	24979119	24977899	24978103	142	7	190	0	111	74	0.00297234	0.0255489	0.931	1	-0.069	142	7	271	0	111	74	0.00102372	0.00999847	0.931	1	-0.069	142	7	272	0	111	74	0.00101253	0.0100139	0.931	1	-0.069	142	7	241	0	111	74	0.00145574
ENSG00000117616	C1orf63	chr1	-	25570040	25570715	25570040	25570124	25571640	25571792	24	85	91	66	147	74	3.42897e-09	1.03408e-07	0.124	0.41	-0.286	24	85	169	95	147	74	6.41709e-14	2.71581e-12	0.124	0.472	-0.348	24	85	128	184	147	74	0.000278743	0.00334449	0.124	0.259	-0.135	24	85	113	81	147	74	5.99084e-10
ENSG00000158195	WASF2	chr1	-	27741326	27741457	27741326	27741448	27742478	27742596	29	35	73	0	82	74	1.55431e-15	8.04323e-14	0.428	1	-0.572	29	35	203	0	82	74	0	0	0.428	1	-0.572	29	35	72	0	82	74	1.9984e-15	8.8076e-14	0.428	1	-0.572	29	35	89	0	82	74	0
ENSG00000117751	PPP1R8	chr1	+	28176603	28176943	28176894	28176943	28173538	28173603	62	14	191	0	147	74	5.92457e-09	1.7454e-07	0.69	1	-0.31	62	14	102	0	147	74	1.62938e-06	3.13985e-05	0.69	1	-0.31	62	14	65	0	147	74	4.83266e-05	0.000702762	0.69	1	-0.31	62	14	108	0	147	74	1.01626e-06
ENSG00000162510	MATN1	chr1	-	31194251	31194598	31194251	31194494	31196304	31196434	3158	175	9514	0	147	74	0	0	0.901	1	-0.099	3158	175	7169	158	147	74	3.33067e-16	1.6796e-14	0.901	0.958	-0.057	3158	175	6181	0	147	74	0	0	0.901	1	-0.099	3158	175	6420	0	147	74	0
ENSG00000116560	SFPQ	chr1	-	35641980	35642075	35641980	35642072	35642919	35643000	185	154	292	107	76	74	1.41489e-07	3.50347e-06	0.539	0.727	-0.188	185	154	692	392	76	74	0.00240054	0.0200068	0.539	0.632	-0.093	185	154	466	228	76	74	9.62131e-05	0.00130787	0.539	0.666	-0.127	185	154	549	202	76	74	2.62655e-09
ENSG00000117385	LEPRE1	chr1	-	43212045	43213083	43212045	43212523	43213393	43213469	490	14	712	0	147	74	3.02931e-05	0.000497537	0.946	1	-0.054	490	14	625	0	147	74	5.73223e-05	0.000793556	0.946	1	-0.054	490	14	590	0	147	74	7.59743e-05	0.00106039	0.946	1	-0.054	490	14	476	0	147	74	0.000213737
ENSG00000117385	LEPRE1	chr1	-	43223453	43223593	43223453	43223497	43224522	43224654	521	20	1216	0	147	74	3.44211e-09	1.03629e-07	0.929	1	-0.071	521	20	947	0	147	74	2.63368e-08	6.79367e-07	0.929	1	-0.071	521	20	983	0	147	74	1.93632e-08	4.99105e-07	0.929	1	-0.071	521	20	758	0	147	74	1.65027e-07
ENSG00000117385	LEPRE1	chr1	-	43223453	43223616	43223453	43223497	43224522	43224654	134	20	453	0	147	74	8.09797e-13	3.53479e-11	0.771	1	-0.229	134	20	322	0	147	74	6.51493e-11	2.2131e-09	0.771	1	-0.229	134	20	369	0	147	74	1.16238e-11	4.06859e-10	0.771	1	-0.229	134	20	256	0	147	74	1.06193e-09
ENSG00000159479	MED8	chr1	-	43852259	43852341	43852259	43852338	43852528	43852669	214	42	271	14	76	74	9.63938e-06	0.000177414	0.832	0.95	-0.118	214	42	343	8	76	74	2.45106e-10	7.94908e-09	0.832	0.977	-0.145	214	42	209	9	76	74	8.19309e-06	0.000141022	0.832	0.958	-0.126	214	42	426	25	76	74	4.02202e-06
ENSG00000117410	ATP6V0B	chr1	+	44442697	44443967	44443652	44443967	44442444	44442496	248	81	462	0	147	74	0	0	0.606	1	-0.394	248	81	215	0	147	74	0	0	0.606	1	-0.394	248	81	231	3	147	74	0	0	0.606	0.975	-0.369	248	81	195	4	147	74	1.89848e-14
ENSG00000142937	RPS8	chr1	+	45244247	45244451	45244263	45244451	45243671	45243801	235	36	367	0	89	74	3.15303e-14	1.52965e-12	0.844	1	-0.156	235	36	638	0	89	74	0	0	0.844	1	-0.156	235	36	852	0	89	74	0	0	0.844	1	-0.156	235	36	618	0	89	74	0
ENSG00000117862	TXNDC12	chr1	-	52490181	52490251	52490181	52490242	52492946	52493020	276	15	407	0	82	74	1.28492e-05	0.000230549	0.943	1	-0.057	276	15	191	0	82	74	0.000630152	0.00660125	0.943	1	-0.057	276	15	180	0	82	74	0.000827082	0.00848002	0.943	1	-0.057	276	15	252	0	82	74	0.000163359
ENSG00000060718	COL11A1	chr1	-	103379192	103379246	103379192	103379219	103379907	103379961	6305	255	13121	0	100	74	0	0	0.948	1	-0.052	6305	255	10779	0	100	74	0	0	0.948	1	-0.052	6305	255	7515	0	100	74	0	0	0.948	1	-0.052	6305	255	9165	0	100	74	0
ENSG00000060718	COL11A1	chr1	-	103461419	103461464	103461419	103461457	103461544	103461598	4772	321	9787	0	80	74	0	0	0.932	1	-0.068	4772	321	8301	0	80	74	0	0	0.932	1	-0.068	4772	321	5174	0	80	74	0	0	0.932	1	-0.068	4772	321	10455	0	80	74	0
ENSG00000064886	CHI3L2	chr1	+	111772473	111772503	111772479	111772503	111770280	111770391	3118	352	117	0	79	74	3.10285e-06	6.28777e-05	0.892	1	-0.108	3118	352	70	0	79	74	0.000334121	0.00379533	0.892	1	-0.108	3118	352	59	0	79	74	0.00103163	0.0101707	0.892	1	-0.108	3118	352	126	0	79	74	1.29038e-06
ENSG00000131778	CHD1L	chr1	+	146766090	146766199	146766094	146766199	146765291	146765406	195	18	93	0	77	74	0.00079765	0.00858309	0.912	1	-0.088	195	18	484	0	77	74	5.58045e-09	1.56585e-07	0.912	1	-0.088	195	18	246	0	77	74	1.4027e-06	2.75365e-05	0.912	1	-0.088	195	18	446	0	77	74	1.09559e-08
ENSG00000176444	CLK2	chr1	-	155238083	155238236	155238083	155238150	155238498	155238583	1	27	51	41	147	74	1.32999e-07	3.30701e-06	0.018	0.385	-0.367	1	27	68	61	147	74	2.00553e-07	4.52178e-06	0.018	0.359	-0.341	1	27	23	19	147	74	2.35956e-06	4.47487e-05	0.018	0.379	-0.361	1	27	35	18	147	74	9.00775e-09
ENSG00000133048	CHI3L1	chr1	-	203151858	203151980	203151858	203151971	203152768	203152891	2419	221	991	0	82	74	0	0	0.908	1	-0.092	2419	221	431	0	82	74	5.21805e-15	2.40756e-13	0.908	1	-0.092	2419	221	259	0	82	74	7.69867e-10	2.32536e-08	0.908	1	-0.092	2419	221	264	0	82	74	5.37593e-10
ENSG00000162889	MAPKAPK2	chr1	+	206904989	206905070	206905017	206905070	206904482	206904607	27	18	26	0	101	74	3.05122e-05	0.000500675	0.524	1	-0.476	27	18	26	0	101	74	3.05122e-05	0.000453679	0.524	1	-0.476	27	18	35	0	101	74	2.59477e-06	4.87368e-05	0.524	1	-0.476	27	18	36	0	101	74	2.01343e-06
ENSG00000196878	LAMB3	chr1	-	209790786	209790925	209790786	209790922	209791251	209791393	159	337	38	0	76	74	0	0	0.315	1	-0.685	159	337	60	0	76	74	0	0	0.315	1	-0.685	159	337	28	0	76	74	4.67404e-14	1.92955e-12	0.315	1	-0.685	159	337	67	0	76	74	0
ENSG00000196878	LAMB3	chr1	-	209790786	209790931	209790786	209790922	209791251	209791393	2581	337	770	0	82	74	0	0	0.874	1	-0.126	2581	337	1113	0	82	74	0	0	0.874	1	-0.126	2581	337	465	0	82	74	0	0	0.874	1	-0.126	2581	337	1134	0	82	74	0
ENSG00000136754	ABI1	chr10	-	27054146	27054247	27054146	27054238	27057780	27057921	340	26	293	0	82	74	4.03443e-07	9.26985e-06	0.922	1	-0.078	340	26	451	0	82	74	4.99908e-09	1.4138e-07	0.922	1	-0.078	340	26	300	0	82	74	3.22273e-07	7.14204e-06	0.922	1	-0.078	340	26	335	0	82	74	1.0985e-07
ENSG00000099246	RAB18	chr10	+	27822856	27822923	27822869	27822923	27822663	27822782	254	20	461	0	86	74	1.54471e-08	4.35668e-07	0.916	1	-0.084	254	20	239	0	86	74	4.13098e-06	7.3879e-05	0.916	1	-0.084	254	20	160	0	86	74	7.31923e-05	0.0010289	0.916	1	-0.084	254	20	317	0	86	74	4.14451e-07
ENSG00000107951	MTPAP	chr10	-	30605046	30605139	30605046	30605133	30611319	30611546	33	5	106	0	79	74	0.000805384	0.00864614	0.861	1	-0.139	33	5	129	0	79	74	0.000448559	0.00489939	0.861	1	-0.139	33	5	66	0	79	74	0.00332089	0.0267874	0.861	1	-0.139	33	5	105	0	79	74	0.000828663
ENSG00000138293	NCOA4	chr10	+	51580879	51580968	51580891	51580968	51580555	51580696	56	5	298	0	85	74	0.000404618	0.00484808	0.907	1	-0.093	56	5	138	0	85	74	0.00229323	0.0193648	0.907	1	-0.093	56	5	97	0	85	74	0.00567363	0.0410971	0.907	1	-0.093	56	5	137	0	85	74	0.00233625
ENSG00000171988	JMJD1C	chr10	-	64945322	64945413	64945322	64945405	64945974	64946136	210	20	206	0	81	74	2.51769e-06	5.14283e-05	0.906	1	-0.094	210	20	342	0	81	74	2.93453e-08	7.51543e-07	0.906	1	-0.094	210	20	308	0	81	74	7.71511e-08	1.86859e-06	0.906	1	-0.094	210	20	447	0	81	74	2.32831e-09
ENSG00000077150	NFKB2	chr10	+	104161205	104161275	104161211	104161275	104160936	104161088	687	41	288	0	79	74	2.43324e-06	4.98744e-05	0.94	1	-0.06	687	41	668	0	79	74	1.14993e-10	3.85505e-09	0.94	1	-0.06	687	41	197	0	79	74	6.08748e-05	0.000869815	0.94	1	-0.06	687	41	327	0	79	74	6.93498e-07
ENSG00000177697	CD151	chr11	+	837249	837354	837306	837354	836768	836843	635	73	1150	0	130	74	0	0	0.832	1	-0.168	635	73	651	0	130	74	0	0	0.832	1	-0.168	635	73	484	0	130	74	0	0	0.832	1	-0.168	635	73	557	0	130	74	0
ENSG00000130600	H19	chr11	-	2017105	2017171	2017105	2017121	2017308	2017421	2392	868	1805	0	123	74	0	0	0.624	1	-0.376	2392	868	2915	686	123	74	7.67164e-14	3.21634e-12	0.624	0.719	-0.095	2392	868	3250	0	123	74	0	0	0.624	1	-0.376	2392	868	1783	0	123	74	0
ENSG00000130600	H19	chr11	-	2017105	2017212	2017105	2017121	2017308	2017421	5125	868	3988	0	147	74	0	0	0.748	1	-0.252	5125	868	6191	686	147	74	5.77316e-15	2.65684e-13	0.748	0.82	-0.072	5125	868	6895	0	147	74	0	0	0.748	1	-0.252	5125	868	4323	0	147	74	0
ENSG00000110619	CARS	chr11	-	3023199	3023404	3023199	3023283	3023770	3023830	46	254	96	287	147	74	0.00173328	0.0163813	0.084	0.144	-0.06	46	254	176	240	147	74	2.77556e-15	1.30073e-13	0.084	0.27	-0.186	46	254	75	116	147	74	3.09807e-09	8.70242e-08	0.084	0.246	-0.162	46	254	146	188	147	74	2.66454e-15
ENSG00000184014	DENND5A	chr11	-	9191402	9191496	9191402	9191463	9192173	9193792	358	46	473	0	106	74	3.33067e-16	1.76446e-14	0.845	1	-0.155	358	46	760	0	106	74	0	0	0.845	1	-0.155	358	46	487	0	106	74	1.11022e-16	5.2479e-15	0.845	1	-0.155	358	46	544	0	106	74	0
ENSG00000184014	DENND5A	chr11	-	9215040	9215228	9215040	9215117	9225206	9225864	469	44	761	0	147	74	0	0	0.843	1	-0.157	469	44	1181	39	147	74	5.37051e-06	9.40733e-05	0.843	0.938	-0.095	469	44	792	11	147	74	2.51948e-10	8.06129e-09	0.843	0.973	-0.13	469	44	759	30	147	74	0.000358193
ENSG00000129084	PSMA1	chr11	-	14539425	14539527	14539425	14539493	14540542	14540587	399	22	761	0	107	74	3.0072e-09	9.1461e-08	0.926	1	-0.074	399	22	455	0	107	74	3.21963e-07	7.07212e-06	0.926	1	-0.074	399	22	430	0	107	74	5.24815e-07	1.12483e-05	0.926	1	-0.074	399	22	515	0	107	74	1.07745e-07
ENSG00000129084	PSMA1	chr11	-	14539457	14539522	14539457	14539493	14540542	14540587	30	22	63	0	102	74	6.30087e-10	2.13452e-08	0.497	1	-0.503	30	22	44	0	102	74	5.36413e-08	1.29337e-06	0.497	1	-0.503	30	22	39	0	102	74	2.05368e-07	4.70453e-06	0.497	1	-0.503	30	22	40	0	102	74	1.55951e-07
ENSG00000134802	SLC43A3	chr11	-	57193461	57193825	57193461	57193789	57194060	57194125	375	53	505	5	109	74	3.05311e-14	1.48521e-12	0.828	0.986	-0.158	375	53	343	0	109	74	9.88098e-15	4.44446e-13	0.828	1	-0.172	375	53	186	0	109	74	1.22066e-09	3.5765e-08	0.828	1	-0.172	375	53	235	0	109	74	2.22201e-11
ENSG00000134802	SLC43A3	chr11	-	57193461	57193862	57193461	57193789	57194060	57194125	350	53	472	5	146	74	3.36398e-14	1.62756e-12	0.77	0.98	-0.21	350	53	294	0	146	74	4.19664e-14	1.80597e-12	0.77	1	-0.23	350	53	174	0	146	74	9.73015e-10	2.9053e-08	0.77	1	-0.23	350	53	210	0	146	74	3.76575e-11
ENSG00000134802	SLC43A3	chr11	-	57194060	57194223	57194060	57194125	57194534	57194594	42	155	34	35	147	74	1.91464e-05	0.000328042	0.12	0.328	-0.208	42	155	45	11	147	74	7.77156e-16	3.79091e-14	0.12	0.673	-0.553	42	155	18	10	147	74	8.34441e-06	0.000142997	0.12	0.475	-0.355	42	155	15	11	147	74	0.000224068
ENSG00000254772	EEF1G	chr11	-	62327540	62327665	62327540	62327654	62327753	62327926	17	7	52	0	84	74	8.57863e-05	0.00127309	0.681	1	-0.319	17	7	69	0	84	74	2.09809e-05	0.000321575	0.681	1	-0.319	17	7	105	0	84	74	2.41753e-06	4.57371e-05	0.681	1	-0.319	17	7	70	0	84	74	1.95031e-05
ENSG00000254772	EEF1G	chr11	-	62338436	62338580	62338436	62338562	62339011	62339154	153	45	57	0	91	74	1.47657e-06	3.13078e-05	0.734	1	-0.266	153	45	181	0	91	74	1.09912e-14	4.91912e-13	0.734	1	-0.266	153	45	196	0	91	74	1.88738e-15	8.36542e-14	0.734	1	-0.266	153	45	150	0	91	74	5.48561e-13
ENSG00000085733	CTTN	chr11	+	70269045	70269101	70269057	70269101	70267575	70267686	114	21	425	0	85	74	1.87517e-13	8.69542e-12	0.825	1	-0.175	114	21	100	0	85	74	2.51024e-06	4.6762e-05	0.825	1	-0.175	114	21	91	0	85	74	5.67911e-06	0.000100972	0.825	1	-0.175	114	21	112	0	85	74	8.95345e-07
ENSG00000196611	MMP1	chr11	-	102663335	102663467	102663335	102663380	102665904	102666022	5491	322	1692	0	147	74	0	0	0.896	1	-0.104	5491	322	1469	0	147	74	0	0	0.896	1	-0.104	5491	322	281	0	147	74	1.36234e-07	3.20529e-06	0.896	1	-0.104	5491	322	837	0	147	74	0
ENSG00000182326	C1S	chr12	+	7171570	7171696	7171588	7171696	7170193	7170371	258	48	366	0	91	74	0	0	0.814	1	-0.186	258	48	54	0	91	74	0.000107925	0.00139658	0.814	1	-0.186	258	48	120	0	91	74	2.3753e-08	6.04293e-07	0.814	1	-0.186	258	48	67	0	91	74	1.76109e-05
ENSG00000111716	LDHB	chr12	-	21790004	21790128	21790004	21790117	21791286	21791472	1122	66	1380	0	84	74	0	0	0.937	1	-0.063	1122	66	926	0	84	74	6.10623e-15	2.78861e-13	0.937	1	-0.063	1122	66	1104	0	84	74	1.11022e-16	5.2479e-15	0.937	1	-0.063	1122	66	781	0	84	74	2.10054e-13
ENSG00000061273	HDAC7	chr12	-	48188966	48189163	48188966	48189042	48189369	48189550	185	12	91	0	147	74	0.00517567	0.0398474	0.886	1	-0.114	185	12	164	0	147	74	0.000381053	0.00424757	0.886	1	-0.114	185	12	139	0	147	74	0.000855308	0.00868971	0.886	1	-0.114	185	12	112	0	147	74	0.00224875
ENSG00000092841	MYL6	chr12	+	56553758	56553932	56553808	56553932	56552467	56552495	78	882	114	582	123	74	2.95527e-07	6.95364e-06	0.051	0.105	-0.054	78	882	103	0	123	74	0	0	0.051	1	-0.949	78	882	117	0	123	74	0	0	0.051	1	-0.949	78	882	125	405	123	74	4.44089e-16
ENSG00000175197	DDIT3	chr12	-	57911051	57911270	57911051	57911221	57911488	57911536	54	297	38	70	122	74	1.89406e-05	0.000324828	0.099	0.248	-0.149	54	297	198	395	122	74	5.55181e-10	1.73151e-08	0.099	0.233	-0.134	54	297	131	293	122	74	3.35038e-07	7.40397e-06	0.099	0.213	-0.114	54	297	148	424	122	74	0.000145089
ENSG00000175197	DDIT3	chr12	-	57911051	57911325	57911051	57911221	57911488	57911536	67	297	60	70	147	74	2.15162e-09	6.6689e-08	0.102	0.301	-0.199	67	297	285	395	147	74	3.77476e-15	1.75521e-13	0.102	0.266	-0.164	67	297	204	293	147	74	6.37601e-13	2.42723e-11	0.102	0.26	-0.158	67	297	211	424	147	74	2.9968e-07
ENSG00000175197	DDIT3	chr12	-	57911051	57911378	57911051	57911221	57911488	57911536	84	297	60	70	147	74	3.16353e-07	7.40217e-06	0.125	0.301	-0.176	84	297	298	395	147	74	2.72327e-12	1.02852e-10	0.125	0.275	-0.15	84	297	222	293	147	74	2.87582e-11	9.80286e-10	0.125	0.276	-0.151	84	297	224	424	147	74	1.84567e-05
ENSG00000187109	NAP1L1	chr12	-	76449812	76449941	76449812	76449938	76453577	76453658	2370	330	1737	36	76	74	0	0	0.875	0.979	-0.104	2370	330	2653	40	76	74	0	0	0.875	0.985	-0.11	2370	330	2688	35	76	74	0	0	0.875	0.987	-0.112	2370	330	2496	37	76	74	0
ENSG00000075415	SLC25A3	chr12	+	98989504	98989626	98989506	98989626	98987756	98987913	1592	100	1314	0	75	74	0	0	0.94	1	-0.06	1592	100	1611	0	75	74	0	0	0.94	1	-0.06	1592	100	1482	0	75	74	0	0	0.94	1	-0.06	1592	100	1190	0	75	74	0
ENSG00000008405	CRY1	chr12	-	107391692	107391844	107391692	107391722	107393328	107393640	103	13	148	0	147	74	8.71356e-06	0.000161974	0.8	1	-0.2	103	13	277	0	147	74	7.00829e-08	1.66617e-06	0.8	1	-0.2	103	13	274	0	147	74	7.66243e-08	1.8587e-06	0.8	1	-0.2	103	13	208	0	147	74	6.94081e-07
ENSG00000089154	GCN1L1	chr12	-	120569729	120569826	120569729	120569792	120572094	120572209	114	10	391	0	107	74	1.49186e-06	3.15198e-05	0.887	1	-0.113	114	10	204	0	107	74	4.6393e-05	0.000660197	0.887	1	-0.113	114	10	145	0	107	74	0.000257217	0.00310765	0.887	1	-0.113	114	10	199	0	107	74	5.27598e-05
ENSG00000089157	RPLP0	chr12	-	120634616	120634737	120634616	120634731	120635124	120635265	472	192	476	0	79	74	0	0	0.697	1	-0.303	472	192	684	0	79	74	0	0	0.697	1	-0.303	472	192	741	0	79	74	0	0	0.697	1	-0.303	472	192	621	0	79	74	0
ENSG00000089159	PXN	chr12	-	120652905	120653220	120652905	120653076	120653362	120653458	48	73	50	23	147	74	9.72983e-05	0.00141276	0.249	0.523	-0.274	48	73	92	43	147	74	4.78693e-06	8.46796e-05	0.249	0.519	-0.27	48	73	70	31	147	74	9.8757e-06	0.000166504	0.249	0.532	-0.283	48	73	81	41	147	74	2.9645e-05
ENSG00000111011	RSRC2	chr12	-	122995655	122995735	122995655	122995700	123001773	123001977	132	20	357	0	108	74	2.53214e-11	9.76378e-10	0.819	1	-0.181	132	20	692	18	108	74	5.65062e-07	1.17762e-05	0.819	0.963	-0.144	132	20	505	0	108	74	3.56049e-13	1.39617e-11	0.819	1	-0.181	132	20	419	0	108	74	3.57392e-12
ENSG00000111011	RSRC2	chr12	-	123003385	123003598	123003385	123003576	123005931	123005975	16	304	105	448	95	74	8.25582e-10	2.74984e-08	0.039	0.154	-0.115	16	304	134	1018	95	74	0.000210658	0.00251748	0.039	0.093	-0.054	16	304	91	632	95	74	8.44595e-05	0.00116325	0.039	0.101	-0.062	16	304	110	582	95	74	1.80812e-07
ENSG00000112787	FBRSL1	chr12	+	133146920	133147126	133146923	133147126	133146511	133146827	0	22	22	21	76	74	4.74347e-06	9.28566e-05	0	0.505	-0.505	0	22	32	33	76	74	3.10655e-06	5.69809e-05	0	0.486	-0.486	0	22	9	16	76	74	0.000815637	0.0083957	0	0.354	-0.354	0	22	13	18	76	74	0.000132435
ENSG00000152767	FARP1	chr13	+	99064154	99064288	99064163	99064288	99062987	99063077	129	11	250	0	82	74	2.02807e-05	0.00034648	0.914	1	-0.086	129	11	294	0	82	74	8.80277e-06	0.000148807	0.914	1	-0.086	129	11	260	0	82	74	1.65688e-05	0.000267804	0.914	1	-0.086	129	11	246	0	82	74	2.20379e-05
ENSG00000134871	COL4A2	chr13	+	111138001	111138183	111138010	111138183	111137251	111137374	396	34	339	0	82	74	5.19421e-09	1.54554e-07	0.913	1	-0.087	396	34	378	0	82	74	1.27857e-09	3.87948e-08	0.913	1	-0.087	396	34	595	0	82	74	2.1011e-12	7.84577e-11	0.913	1	-0.087	396	34	147	0	82	74	2.8038e-05
ENSG00000100796	SMEK1	chr14	-	91939582	91939714	91939582	91939665	91942193	91942310	54	6	254	0	122	74	4.60284e-05	0.000733701	0.845	1	-0.155	54	6	250	0	122	74	4.87203e-05	0.000688934	0.845	1	-0.155	54	6	175	0	122	74	0.000180581	0.00225848	0.845	1	-0.155	54	6	191	0	122	74	0.000130471
ENSG00000100600	LGMN	chr14	-	93185091	93185189	93185091	93185185	93198993	93199160	478	30	866	6	77	74	1.02462e-08	2.93619e-07	0.939	0.993	-0.054	478	30	834	0	77	74	5.72842e-11	1.94962e-09	0.939	1	-0.061	478	30	273	2	77	74	9.95073e-05	0.00134796	0.939	0.992	-0.053	478	30	493	0	77	74	1.79733e-08
ENSG00000140416	TPM1	chr15	+	63351761	63351837	63351763	63351837	63349204	63349317	897	54	467	0	75	74	4.16849e-09	1.24657e-07	0.942	1	-0.058	897	54	156	0	75	74	0.000250814	0.00295012	0.942	1	-0.058	897	54	179	0	75	74	9.54698e-05	0.00130002	0.942	1	-0.058	897	54	105	0	75	74	0.00242515
ENSG00000140416	TPM1	chr15	+	63353396	63354476	63354413	63354476	63353067	63353138	83	16	260	0	147	74	3.55934e-10	1.23869e-08	0.723	1	-0.277	83	16	67	0	147	74	7.50053e-05	0.00101034	0.723	1	-0.277	83	16	69	0	147	74	6.12462e-05	0.000874324	0.723	1	-0.277	83	16	63	0	147	74	0.000113509
ENSG00000169371	SNUPN	chr15	-	75909749	75909893	75909749	75909889	75913234	75913397	33	6	102	0	77	74	0.000244195	0.00315457	0.841	1	-0.159	33	6	62	0	77	74	0.00149606	0.0136169	0.841	1	-0.159	33	6	53	0	77	74	0.0025695	0.0219685	0.841	1	-0.159	33	6	61	0	77	74	0.00158375
ENSG00000185043	CIB1	chr15	-	90775450	90775659	90775450	90775559	90776900	90776935	11	200	23	104	147	74	0.000196171	0.00261167	0.027	0.1	-0.073	11	200	57	129	147	74	5.65625e-12	2.09644e-10	0.027	0.182	-0.155	11	200	39	92	147	74	6.42049e-10	1.9468e-08	0.027	0.176	-0.149	11	200	34	108	147	74	2.88334e-07
ENSG00000185043	CIB1	chr15	-	90775450	90775679	90775450	90775559	90776900	90776935	13	200	20	104	147	74	0.00370307	0.0306495	0.032	0.088	-0.056	13	200	57	129	147	74	5.39755e-11	1.84051e-09	0.032	0.182	-0.15	13	200	48	92	147	74	8.84792e-12	3.14624e-10	0.032	0.208	-0.176	13	200	34	108	147	74	1.57779e-06
ENSG00000260807	RP11-161M6.2	chr16	-	1029024	1029249	1029024	1029110	1029600	1029763	7	34	97	37	147	74	2.50447e-10	8.88913e-09	0.094	0.569	-0.475	7	34	42	30	147	74	1.40217e-05	0.000224287	0.094	0.413	-0.319	7	34	31	20	147	74	1.78746e-05	0.00028625	0.094	0.438	-0.344	7	34	43	47	147	74	0.000585389
ENSG00000260807	RP11-161M6.2	chr16	-	1029024	1029273	1029024	1029110	1029600	1029763	8	34	97	37	147	74	8.15709e-10	2.72203e-08	0.106	0.569	-0.463	8	34	41	30	147	74	4.60504e-05	0.000656365	0.106	0.408	-0.302	8	34	32	20	147	74	2.84495e-05	0.000436821	0.106	0.446	-0.34	8	34	44	47	147	74	0.00102824
ENSG00000169180	XPO6	chr16	-	28145161	28145254	28145161	28145251	28146536	28146645	69	19	285	19	76	74	8.84045e-05	0.00130329	0.78	0.936	-0.156	69	19	144	6	76	74	3.1034e-05	0.00046029	0.78	0.959	-0.179	69	19	115	8	76	74	0.00142179	0.0133445	0.78	0.933	-0.153	69	19	145	12	76	74	0.00227671
ENSG00000168488	ATXN2L	chr16	+	28843525	28843669	28843557	28843669	28842305	28842393	171	8	310	0	105	74	0.000646339	0.00719394	0.938	1	-0.062	171	8	329	0	105	74	0.000536136	0.0057301	0.938	1	-0.062	171	8	217	0	105	74	0.00201698	0.0179509	0.938	1	-0.062	171	8	238	0	105	74	0.00150264
ENSG00000168488	ATXN2L	chr16	+	28843816	28843888	28843822	28843888	28843525	28843720	303	36	408	0	79	74	1.03251e-12	4.46952e-11	0.887	1	-0.113	303	36	453	0	79	74	1.76859e-13	7.27844e-12	0.887	1	-0.113	303	36	345	0	79	74	1.55864e-11	5.38334e-10	0.887	1	-0.113	303	36	334	0	79	74	2.58713e-11
ENSG00000039523	FAM65A	chr16	+	67575555	67575685	67575639	67575685	67575332	67575481	195	27	148	0	147	74	2.75868e-07	6.52327e-06	0.784	1	-0.216	195	27	191	0	147	74	1.43827e-08	3.83723e-07	0.784	1	-0.216	195	27	133	0	147	74	8.51075e-07	1.74064e-05	0.784	1	-0.216	195	27	110	0	147	74	5.37095e-06
ENSG00000124067	SLC12A4	chr16	-	67984556	67984614	67984556	67984607	67984864	67984963	129	7	164	0	80	74	0.00473188	0.0372895	0.945	1	-0.055	129	7	182	0	80	74	0.00360163	0.028021	0.945	1	-0.055	129	7	188	0	80	74	0.00330848	0.0267103	0.945	1	-0.055	129	7	147	0	80	74	0.00629602
ENSG00000198373	WWP2	chr16	+	69967872	69968032	69967942	69968032	69965704	69965793	274	34	1172	0	143	74	0	0	0.807	1	-0.193	274	34	2113	1	143	74	0	0	0.807	0.999	-0.192	274	34	624	0	143	74	0	0	0.807	1	-0.193	274	34	1089	0	143	74	0
ENSG00000103335	PIEZO1	chr16	-	88798782	88798943	88798782	88798886	88799014	88799126	203	9	485	0	130	74	7.00054e-05	0.00106433	0.928	1	-0.072	203	9	327	0	130	74	0.000321183	0.00367636	0.928	1	-0.072	203	9	180	0	130	74	0.00299252	0.0247468	0.928	1	-0.072	203	9	237	0	130	74	0.00110626
ENSG00000167526	RPL13	chr16	+	89627634	89628159	89627985	89628159	89627353	89627471	106	147	154	0	147	74	0	0	0.266	1	-0.734	106	147	339	97	147	74	0	0	0.266	0.638	-0.372	106	147	436	126	147	74	0	0	0.266	0.635	-0.369	106	147	277	77	147	74	0
ENSG00000108518	PFN1	chr17	-	4849922	4850115	4849922	4850111	4851557	4852309	1610	125	2997	17	77	74	0	0	0.925	0.994	-0.069	1610	125	1934	0	77	74	0	0	0.925	1	-0.075	1610	125	1992	0	77	74	0	0	0.925	1	-0.075	1610	125	1315	0	77	74	0
ENSG00000129245	FXR2	chr17	-	7504726	7504843	7504726	7504833	7506226	7506320	143	12	292	0	83	74	6.29068e-06	0.000120631	0.914	1	-0.086	143	12	190	0	83	74	6.69463e-05	0.000912775	0.914	1	-0.086	143	12	141	0	83	74	0.000309102	0.00365273	0.914	1	-0.086	143	12	189	3	83	74	0.00477298
ENSG00000132510	KDM6B	chr17	+	7755268	7755383	7755276	7755383	7754965	7755114	367	49	145	0	81	74	1.54299e-07	3.80484e-06	0.872	1	-0.128	367	49	545	0	81	74	0	0	0.872	1	-0.128	367	49	359	0	81	74	5.57332e-14	2.29474e-12	0.872	1	-0.128	367	49	560	0	81	74	0
ENSG00000179094	PER1	chr17	-	8050567	8050699	8050567	8050688	8050787	8050896	239	65	32	0	84	74	0.000349375	0.00430165	0.764	1	-0.236	239	65	1285	0	84	74	0	0	0.764	1	-0.236	239	65	775	0	84	74	0	0	0.764	1	-0.236	239	65	333	0	84	74	0
ENSG00000007237	GAS7	chr17	-	9822942	9823022	9822942	9823019	9828792	9828916	301	20	336	0	76	74	2.2343e-06	4.5955e-05	0.936	1	-0.064	301	20	355	0	76	74	1.48414e-06	2.86923e-05	0.936	1	-0.064	301	20	189	0	76	74	0.000110817	0.00147813	0.936	1	-0.064	301	20	221	0	76	74	4.15275e-05
ENSG00000108840	HDAC5	chr17	-	42170681	42170823	42170681	42170763	42170942	42171202	110	16	113	0	133	74	1.15986e-05	0.000210223	0.793	1	-0.207	110	16	214	0	133	74	4.94899e-08	1.21199e-06	0.793	1	-0.207	110	16	199	0	133	74	9.75903e-08	2.32759e-06	0.793	1	-0.207	110	16	164	0	133	74	5.56017e-07
ENSG00000108840	HDAC5	chr17	-	42170681	42170826	42170681	42170763	42170942	42171202	182	16	189	0	136	74	1.10605e-05	0.000201905	0.861	1	-0.139	182	16	398	0	136	74	2.43076e-08	6.30659e-07	0.861	1	-0.139	182	16	285	0	136	74	4.4014e-07	9.53799e-06	0.861	1	-0.139	182	16	271	0	136	74	6.68589e-07
ENSG00000108840	HDAC5	chr17	-	42170681	42170850	42170681	42170763	42170942	42171202	133	16	136	0	147	74	1.12594e-05	0.000204699	0.807	1	-0.193	133	16	273	0	147	74	2.87531e-08	7.38505e-07	0.807	1	-0.193	133	16	222	0	147	74	1.94287e-07	4.47691e-06	0.807	1	-0.193	133	16	200	0	147	74	4.89148e-07
ENSG00000108840	HDAC5	chr17	-	42170681	42170853	42170681	42170763	42170942	42171202	202	16	196	0	147	74	1.77878e-05	0.000307421	0.864	1	-0.136	202	16	402	0	147	74	5.62967e-08	1.35278e-06	0.864	1	-0.136	202	16	316	0	147	74	4.41827e-07	9.56131e-06	0.864	1	-0.136	202	16	289	0	147	74	9.21269e-07
ENSG00000121073	SLC35B1	chr17	-	47783565	47783696	47783565	47783653	47784326	47784430	105	6	635	1	116	74	0.000176626	0.00237269	0.918	0.998	-0.08	105	6	239	0	116	74	0.00114411	0.0109411	0.918	1	-0.082	105	6	162	0	116	74	0.00348971	0.0278004	0.918	1	-0.082	105	6	162	0	116	74	0.00348971
ENSG00000243678	NME1-NME2	chr17	+	49248847	49249105	49248865	49249105	49247297	49247410	244	137	420	0	91	74	0	0	0.592	1	-0.408	244	137	216	0	91	74	0	0	0.592	1	-0.408	244	137	273	0	91	74	0	0	0.592	1	-0.408	244	137	320	0	91	74	0
ENSG00000108443	RPS6KB1	chr17	+	58003795	58003943	58003903	58003943	57991995	57992064	39	8	117	0	147	74	1.63845e-05	0.000285937	0.71	1	-0.29	39	8	79	0	147	74	0.000133746	0.00168851	0.71	1	-0.29	39	8	51	0	147	74	0.00108494	0.0105895	0.71	1	-0.29	39	8	63	0	147	74	0.000409803
ENSG00000011028	MRC2	chr17	+	60749009	60749198	60749083	60749198	60744750	60744894	288	13	294	0	147	74	0.00013345	0.00185552	0.918	1	-0.082	288	13	312	0	147	74	9.69419e-05	0.00126768	0.918	1	-0.082	288	13	366	0	147	74	4.0005e-05	0.000591046	0.918	1	-0.082	288	13	244	0	147	74	0.000349521
ENSG00000108588	CCDC47	chr17	-	61830100	61830159	61830100	61830154	61831792	61831878	195	29	444	0	78	74	4.69624e-14	2.25309e-12	0.864	1	-0.136	195	29	443	0	78	74	4.86278e-14	2.07765e-12	0.864	1	-0.136	195	29	263	0	78	74	1.18888e-10	3.9326e-09	0.864	1	-0.136	195	29	369	0	78	74	8.30225e-13
ENSG00000161526	SAP30BP	chr17	+	73702419	73702625	73702427	73702625	73702087	73702172	206	14	344	0	81	74	6.77996e-06	0.000129043	0.931	1	-0.069	206	14	352	0	81	74	5.94072e-06	0.000103153	0.931	1	-0.069	206	14	204	0	81	74	0.000125636	0.00164493	0.931	1	-0.069	206	14	210	0	81	74	0.000107693
ENSG00000184009	ACTG1	chr17	-	79478928	79479168	79478928	79479141	79479257	79479386	3895	206	10506	0	100	74	0	0	0.933	1	-0.067	3895	206	9633	0	100	74	0	0	0.933	1	-0.067	3895	206	7364	0	100	74	0	0	0.933	1	-0.067	3895	206	7947	0	100	74	0
ENSG00000262660	SLC25A10	chr17	+	79673935	79674070	79673960	79674070	79671662	79671746	173	15	548	0	98	74	9.02409e-09	2.5985e-07	0.897	1	-0.103	173	15	159	0	98	74	6.32922e-05	0.000866796	0.897	1	-0.103	173	15	130	0	98	74	0.000208146	0.00256631	0.897	1	-0.103	173	15	189	0	98	74	2.10413e-05
ENSG00000215621	AC174470.1	chr17	-	79782162	79782281	79782162	79782266	79782374	79784533	169	10	305	1	88	74	0.000329455	0.00409309	0.934	0.996	-0.062	169	10	167	1	88	74	0.00541066	0.0387137	0.934	0.993	-0.059	169	10	257	0	88	74	0.000240635	0.00292766	0.934	1	-0.066	169	10	175	0	88	74	0.0011099
ENSG00000215621	AC174470.1	chr17	-	79782162	79782291	79782162	79782266	79782374	79784533	132	10	300	1	98	74	6.58562e-05	0.00101103	0.909	0.996	-0.087	132	10	165	1	98	74	0.00171849	0.0152375	0.909	0.992	-0.083	132	10	247	0	98	74	5.05487e-05	0.00073434	0.909	1	-0.091	132	10	170	0	98	74	0.000294861
ENSG00000118680	MYL12B	chr18	+	3272881	3273080	3272980	3273080	3261906	3262235	984	27	1474	0	147	74	6.39139e-09	1.87674e-07	0.948	1	-0.052	984	27	661	0	147	74	6.13768e-06	0.000106264	0.948	1	-0.052	984	27	922	0	147	74	4.02387e-07	8.75626e-06	0.948	1	-0.052	984	27	657	0	147	74	6.43235e-06
ENSG00000128791	TWSG1	chr18	+	9396277	9396544	9396379	9396544	9359969	9360069	592	18	496	0	147	74	5.34089e-05	0.000838618	0.943	1	-0.057	592	18	638	0	147	74	1.13649e-05	0.000186656	0.943	1	-0.057	592	18	339	0	147	74	0.000440897	0.00495922	0.943	1	-0.057	592	18	581	0	147	74	2.04266e-05
ENSG00000104964	AES	chr19	-	3054117	3054192	3054117	3054183	3055661	3055724	615	36	479	0	82	74	1.9888e-08	5.54782e-07	0.939	1	-0.061	615	36	324	0	82	74	1.2378e-06	2.42441e-05	0.939	1	-0.061	615	36	415	0	82	74	9.8545e-08	2.34678e-06	0.939	1	-0.061	615	36	294	0	82	74	3.074e-06
ENSG00000130255	RPL36	chr19	+	5690516	5690611	5690557	5690611	5690316	5690338	2878	109	1667	0	114	74	0	0	0.945	1	-0.055	2878	109	1949	0	114	74	0	0	0.945	1	-0.055	2878	109	2699	0	114	74	0	0	0.945	1	-0.055	2878	109	1809	0	114	74	0
ENSG00000125651	GTF2F1	chr19	-	6380914	6381053	6380914	6381047	6381132	6381206	151	10	309	0	79	74	7.32603e-05	0.00110559	0.934	1	-0.066	151	10	230	0	79	74	0.000241493	0.00285172	0.934	1	-0.066	151	10	172	0	79	74	0.000774608	0.00803681	0.934	1	-0.066	151	10	210	0	79	74	0.000349226
ENSG00000076924	XAB2	chr19	-	7687216	7687330	7687216	7687276	7687415	7687547	214	10	256	0	127	74	0.000500702	0.00580834	0.926	1	-0.074	214	10	379	0	127	74	9.20935e-05	0.00121225	0.926	1	-0.074	214	10	188	0	127	74	0.00173736	0.0157007	0.926	1	-0.074	214	10	283	0	127	74	0.000327486
ENSG00000257103	LSM14A	chr19	+	34699833	34699956	34699863	34699956	34687538	34687668	245	16	430	0	103	74	5.32718e-07	1.19722e-05	0.917	1	-0.083	245	16	359	0	103	74	1.94253e-06	3.6838e-05	0.917	1	-0.083	245	16	212	0	103	74	6.43328e-05	0.000911731	0.917	1	-0.083	245	16	295	0	103	74	7.59928e-06
ENSG00000178982	EIF3K	chr19	+	39125632	39125758	39125636	39125758	39123240	39123318	878	50	802	0	77	74	5.04519e-12	2.06114e-10	0.944	1	-0.056	878	50	648	0	77	74	1.37806e-10	4.56852e-09	0.944	1	-0.056	878	50	789	0	77	74	6.55376e-12	2.35756e-10	0.944	1	-0.056	878	50	618	0	77	74	2.77906e-10
ENSG00000130402	ACTN4	chr19	+	39214576	39214717	39214583	39214717	39214253	39214362	375	21	874	0	80	74	8.60129e-09	2.4888e-07	0.943	1	-0.057	375	21	716	0	80	74	3.42012e-08	8.63569e-07	0.943	1	-0.057	375	21	553	0	80	74	2.29605e-07	5.21394e-06	0.943	1	-0.057	375	21	648	0	80	74	7.07086e-08
ENSG00000090006	LTBP4	chr19	+	41132879	41133260	41133116	41133260	41131761	41131914	477	67	223	0	147	74	1.74707e-11	6.7953e-10	0.782	1	-0.218	477	67	658	0	147	74	0	0	0.782	1	-0.218	477	67	717	59	147	74	0.00458516	0.034825	0.782	0.86	-0.078	477	67	371	0	147	74	1.11022e-16
ENSG00000090372	STRN4	chr19	-	47230708	47230948	47230708	47230824	47231150	47231264	11	51	50	48	147	74	1.64032e-05	0.000285983	0.098	0.344	-0.246	11	51	79	82	147	74	1.07575e-05	0.000177986	0.098	0.327	-0.229	11	51	51	58	147	74	0.000103608	0.00139625	0.098	0.307	-0.209	11	51	44	58	147	74	0.000669111
ENSG00000104805	NUCB1	chr19	+	49422286	49422543	49422450	49422543	49421982	49422041	757	36	944	0	147	74	6.14964e-12	2.48956e-10	0.914	1	-0.086	757	36	902	0	147	74	1.22724e-11	4.42945e-10	0.914	1	-0.086	757	36	1102	0	147	74	5.53446e-13	2.12757e-11	0.914	1	-0.086	757	36	922	0	147	74	8.80629e-12
ENSG00000104852	SNRNP70	chr19	+	49601898	49601961	49601932	49601961	49601683	49601748	375	37	890	0	107	74	0	0	0.875	1	-0.125	375	37	467	0	107	74	1.05427e-12	4.11187e-11	0.875	1	-0.125	375	37	398	0	107	74	1.51541e-11	5.25723e-10	0.875	1	-0.125	375	37	446	0	107	74	2.30671e-12
ENSG00000142534	RPS11	chr19	+	50000776	50001303	50001244	50001303	50000450	50000582	14259	741	5945	0	147	74	0	0	0.906	1	-0.094	14259	741	9554	0	147	74	0	0	0.906	1	-0.094	14259	741	13767	0	147	74	0	0	0.906	1	-0.094	14259	741	8600	0	147	74	0
ENSG00000088038	CNOT3	chr19	+	54658995	54659419	54659046	54659419	54657476	54657577	0	84	17	119	124	74	0.00018485	0.00247386	0	0.079	-0.079	0	84	21	109	124	74	1.29389e-05	0.000208866	0	0.103	-0.103	0	84	6	56	124	74	0.00601188	0.0428723	0	0.06	-0.06	0	84	8	60	124	74	0.00136534
ENSG00000170889	RPS9	chr19	+	54711265	54711515	54711278	54711515	54710143	54710330	66	218	312	0	86	74	0	0	0.207	1	-0.793	66	218	168	0	86	74	0	0	0.207	1	-0.793	66	218	190	221	86	74	3.93254e-10	1.243e-08	0.207	0.425	-0.218	66	218	387	0	86	74	0
ENSG00000083845	RPS5	chr19	+	58904725	58904854	58904737	58904854	58904342	58904552	482	161	322	0	85	74	0	0	0.723	1	-0.277	482	161	493	79	85	74	7.6425e-07	1.54945e-05	0.723	0.845	-0.122	482	161	541	125	85	74	0.00616143	0.0436265	0.723	0.79	-0.067	482	161	527	92	85	74	5.92063e-06
ENSG00000138080	EMILIN1	chr2	+	27303018	27303138	27303050	27303138	27301434	27302103	298	15	679	0	105	74	5.33127e-07	1.19722e-05	0.933	1	-0.067	298	15	276	0	105	74	0.000104958	0.00136354	0.933	1	-0.067	298	15	270	0	105	74	0.000118352	0.00156529	0.933	1	-0.067	298	15	168	0	105	74	0.00125928
ENSG00000115241	PPM1G	chr2	-	27606818	27606959	27606818	27606899	27607539	27607955	389	12	1322	0	133	74	6.98986e-06	0.000132614	0.947	1	-0.053	389	12	518	0	133	74	0.000178166	0.00217123	0.947	1	-0.053	389	12	482	0	133	74	0.000240506	0.00292766	0.947	1	-0.053	389	12	417	0	133	74	0.000438233
ENSG00000115241	PPM1G	chr2	-	27606818	27607066	27606818	27606899	27607539	27607955	223	12	769	0	147	74	1.94857e-07	4.75244e-06	0.903	1	-0.097	223	12	346	0	147	74	2.08727e-05	0.000320741	0.903	1	-0.097	223	12	293	0	147	74	5.35759e-05	0.000773292	0.903	1	-0.097	223	12	246	0	147	74	0.000138548
ENSG00000163001	CCDC104	chr2	+	55771073	55771210	55771160	55771210	55764618	55764721	257	13	219	0	147	74	0.000306855	0.00384981	0.909	1	-0.091	257	13	199	1	147	74	0.00323287	0.025631	0.909	0.99	-0.081	257	13	190	0	147	74	0.000623147	0.00669638	0.909	1	-0.091	257	13	166	0	147	74	0.00117407
ENSG00000221823	PPP3R1	chr2	-	68413599	68413784	68413599	68413722	68415645	68415822	104	6	311	0	135	74	0.000404598	0.00484808	0.905	1	-0.095	104	6	297	0	135	74	0.000464408	0.00505707	0.905	1	-0.095	104	6	324	0	135	74	0.000358365	0.00414411	0.905	1	-0.095	104	6	303	0	135	74	0.000437349
ENSG00000169756	LIMS1	chr2	+	109297150	109297226	109297170	109297226	109294434	109294483	88	14	131	0	93	74	3.78347e-06	7.56398e-05	0.833	1	-0.167	88	14	99	0	93	74	2.73463e-05	0.000409326	0.833	1	-0.167	88	14	100	0	93	74	2.55603e-05	0.000395956	0.833	1	-0.167	88	14	105	0	93	74	1.83457e-05
ENSG00000116044	NFE2L2	chr2	-	178097119	178097290	178097119	178097200	178097977	178098067	141	17	362	0	147	74	1.03871e-09	3.39013e-08	0.807	1	-0.193	141	17	404	0	147	74	3.25747e-10	1.03764e-08	0.807	1	-0.193	141	17	318	0	147	74	3.9833e-09	1.10306e-07	0.807	1	-0.193	141	17	297	0	147	74	7.98586e-09
ENSG00000116044	NFE2L2	chr2	-	178097119	178097311	178097119	178097200	178097977	178098067	383	17	761	0	147	74	9.00267e-08	2.29279e-06	0.919	1	-0.081	383	17	843	0	147	74	4.13783e-08	1.02883e-06	0.919	1	-0.081	383	17	654	0	147	74	2.85217e-07	6.37501e-06	0.919	1	-0.081	383	17	586	0	147	74	6.53298e-07
ENSG00000168542	COL3A1	chr2	+	189864567	189864621	189864577	189864621	189864195	189864303	9511	512	3085	0	83	74	0	0	0.943	1	-0.057	9511	512	8028	0	83	74	0	0	0.943	1	-0.057	9511	512	17857	0	83	74	0	0	0.943	1	-0.057	9511	512	2633	0	83	74	0
ENSG00000204262	COL5A2	chr2	-	189918884	189918938	189918884	189918928	189921698	189921752	744	56	274	0	83	74	8.69816e-08	2.23115e-06	0.922	1	-0.078	744	56	1248	0	83	74	0	0	0.922	1	-0.078	744	56	2735	0	83	74	0	0	0.922	1	-0.078	744	56	190	0	83	74	5.16047e-06
ENSG00000115524	SF3B1	chr2	-	198283232	198283312	198283232	198283278	198285151	198285266	254	47	838	0	107	74	0	0	0.789	1	-0.211	254	47	662	0	107	74	0	0	0.789	1	-0.211	254	47	486	0	107	74	0	0	0.789	1	-0.211	254	47	591	0	107	74	0
ENSG00000138443	ABI2	chr2	+	204281630	204281804	204281636	204281804	204267298	204267457	37	18	66	5	79	74	0.000225875	0.00294132	0.658	0.925	-0.267	37	18	82	10	79	74	0.00148319	0.0135263	0.658	0.885	-0.227	37	18	88	0	79	74	2.56331e-09	7.26551e-08	0.658	1	-0.342	37	18	67	5	79	74	0.000197684
ENSG00000115414	FN1	chr2	-	216252934	216253022	216252934	216253006	216256354	216256537	822	387	3451	0	89	74	0	0	0.638	1	-0.362	822	387	1875	0	89	74	0	0	0.638	1	-0.362	822	387	1307	0	89	74	0	0	0.638	1	-0.362	822	387	1412	0	89	74	0
ENSG00000124831	LRRFIP1	chr2	+	238657006	238657042	238657010	238657042	238617186	238617273	62	17	64	0	77	74	9.04173e-06	0.00016745	0.778	1	-0.222	62	17	101	0	77	74	1.75941e-07	3.99202e-06	0.778	1	-0.222	62	17	52	0	77	74	4.27357e-05	0.000630201	0.778	1	-0.222	62	17	104	0	77	74	1.33523e-07
ENSG00000101365	IDH3B	chr20	-	2639040	2639483	2639040	2639168	2640908	2641011	38	8	114	0	147	74	1.65551e-05	0.000288349	0.705	1	-0.295	38	8	69	0	147	74	0.000235312	0.00278424	0.705	1	-0.295	38	8	62	0	147	74	0.000396642	0.00451226	0.705	1	-0.295	38	8	46	0	147	74	0.00153906
ENSG00000088826	SMOX	chr20	+	4155676	4155910	4155684	4155910	4129425	4129624	451	52	353	0	81	74	1.1835e-12	5.09132e-11	0.888	1	-0.112	451	52	1006	0	81	74	0	0	0.888	1	-0.112	451	52	477	0	81	74	2.44249e-15	1.06746e-13	0.888	1	-0.112	451	52	1069	0	81	74	0
ENSG00000088766	CRLS1	chr20	+	6015109	6015201	6015143	6015201	6012657	6012726	199	25	288	0	107	74	6.38403e-10	2.1586e-08	0.846	1	-0.154	199	25	199	0	107	74	5.27199e-08	1.28059e-06	0.846	1	-0.154	199	25	148	0	107	74	1.13735e-06	2.26977e-05	0.846	1	-0.154	199	25	179	0	107	74	1.6618e-07
ENSG00000089006	SNX5	chr20	-	17934639	17934867	17934639	17934761	17936008	17936119	14	152	73	195	147	74	6.63501e-07	1.47149e-05	0.044	0.159	-0.115	14	152	63	225	147	74	0.000134079	0.00169153	0.044	0.124	-0.08	14	152	38	155	147	74	0.00220037	0.0193627	0.044	0.11	-0.066	14	152	35	152	147	74	0.00485408
ENSG00000101439	CST3	chr20	-	23614550	23614636	23614550	23614632	23615890	23616004	477	24	501	0	77	74	1.02188e-06	2.22212e-05	0.95	1	-0.05	477	24	438	0	77	74	2.79778e-06	5.15287e-05	0.95	1	-0.05	477	24	640	0	77	74	1.57169e-07	3.65933e-06	0.95	1	-0.05	477	24	259	0	77	74	0.00010116
ENSG00000124214	STAU1	chr20	-	47734869	47734945	47734869	47734911	47736518	47736665	204	10	399	0	107	74	8.25785e-05	0.00122856	0.934	1	-0.066	204	10	229	0	107	74	0.000781816	0.00795425	0.934	1	-0.066	204	10	215	0	107	74	0.00100052	0.00991572	0.934	1	-0.066	204	10	207	0	107	74	0.00115842
ENSG00000000419	DPM1	chr20	-	49558567	49558679	49558567	49558659	49562273	49562299	240	10	318	0	93	74	0.000766274	0.00830619	0.95	1	-0.05	240	10	282	0	93	74	0.0011479	0.0109657	0.95	1	-0.05	240	10	204	0	93	74	0.00334769	0.0269306	0.95	1	-0.05	240	10	298	0	93	74	0.000953343
ENSG00000022277	RTFDC1	chr20	+	55091990	55092045	55091999	55092045	55088370	55088484	219	18	445	0	82	74	3.39366e-08	9.1383e-07	0.917	1	-0.083	219	18	238	0	82	74	4.64302e-06	8.25416e-05	0.917	1	-0.083	219	18	162	0	82	74	6.5438e-05	0.000924881	0.917	1	-0.083	219	18	208	0	82	74	1.22473e-05
ENSG00000186866	POFUT2	chr21	-	46683842	46685550	46683842	46683959	46689753	46689934	143	19	294	0	147	74	1.26733e-09	4.09144e-08	0.791	1	-0.209	143	19	672	0	147	74	5.9841e-14	2.54459e-12	0.791	1	-0.209	143	19	438	0	147	74	1.15544e-11	4.05337e-10	0.791	1	-0.209	143	19	482	0	147	74	3.59301e-12
ENSG00000186866	POFUT2	chr21	-	46683842	46687628	46683842	46683959	46689753	46689934	304	19	471	0	147	74	5.5525e-08	1.45992e-06	0.89	1	-0.11	304	19	1056	0	147	74	2.21827e-11	7.82207e-10	0.89	1	-0.11	304	19	762	0	147	74	5.30007e-10	1.62598e-08	0.89	1	-0.11	304	19	810	0	147	74	2.9058e-10
ENSG00000182871	COL18A1	chr21	+	46931024	46931140	46931117	46931140	46929977	46930175	232	26	125	0	147	74	1.1505e-05	0.000208738	0.818	1	-0.182	232	26	296	0	147	74	1.01566e-09	3.1295e-08	0.818	1	-0.182	232	26	308	0	147	74	6.01917e-10	1.83579e-08	0.818	1	-0.182	232	26	113	0	147	74	2.65779e-05
ENSG00000198832	SELM	chr22	-	31501193	31501402	31501193	31501272	31501915	31502149	64	33	13	0	147	74	0.00429244	0.0346442	0.494	1	-0.506	64	33	63	0	147	74	2.51618e-09	7.30058e-08	0.494	1	-0.506	64	33	40	0	147	74	8.40871e-07	1.72428e-05	0.494	1	-0.506	64	33	48	0	147	74	9.87145e-08
ENSG00000100316	RPL3	chr22	-	39710111	39710213	39710111	39710204	39710690	39710841	1078	251	731	0	82	74	0	0	0.795	1	-0.205	1078	251	1646	0	82	74	0	0	0.795	1	-0.205	1078	251	1583	0	82	74	0	0	0.795	1	-0.205	1078	251	1000	0	82	74	0
ENSG00000100316	RPL3	chr22	-	39710154	39710413	39710154	39710204	39710690	39710841	509	251	369	0	147	74	0	0	0.505	1	-0.495	509	251	775	0	147	74	0	0	0.505	1	-0.495	509	251	767	0	147	74	0	0	0.505	1	-0.495	509	251	527	0	147	74	0
ENSG00000077942	FBLN1	chr22	+	45928942	45929044	45928945	45929044	45927144	45927204	272	22	143	0	76	74	0.000121257	0.00170725	0.923	1	-0.077	272	22	271	0	76	74	1.04737e-06	2.06725e-05	0.923	1	-0.077	272	22	741	0	76	74	1.08397e-10	3.6008e-09	0.923	1	-0.077	272	22	135	0	76	74	0.00017386
ENSG00000196576	PLXNB2	chr22	-	50716863	50716948	50716863	50716915	50717024	50717125	596	34	571	0	106	74	1.69162e-09	5.3642e-08	0.924	1	-0.076	596	34	615	0	106	74	6.51196e-10	2.02391e-08	0.924	1	-0.076	596	34	371	0	106	74	2.59215e-07	5.83551e-06	0.924	1	-0.076	596	34	427	0	106	74	5.56769e-08
ENSG00000196576	PLXNB2	chr22	-	50719555	50719618	50719555	50719584	50719788	50719928	450	38	570	0	107	74	5.77538e-13	2.5777e-11	0.891	1	-0.109	450	38	562	0	107	74	7.35967e-13	2.92135e-11	0.891	1	-0.109	450	38	296	0	107	74	1.21251e-08	3.20997e-07	0.891	1	-0.109	450	38	466	0	107	74	1.64421e-11
ENSG00000196576	PLXNB2	chr22	-	50724228	50724330	50724228	50724327	50724418	50724527	208	42	270	0	76	74	1.32117e-14	6.57013e-13	0.828	1	-0.172	208	42	292	0	76	74	2.66454e-15	1.25528e-13	0.828	1	-0.172	208	42	162	0	76	74	1.56326e-10	5.10621e-09	0.828	1	-0.172	208	42	216	0	76	74	1.03784e-12
ENSG00000168137	SETD5	chr3	+	9490071	9490314	9490078	9490314	9489369	9489690	164	20	222	0	80	74	1.10552e-07	2.77983e-06	0.884	1	-0.116	164	20	419	0	80	74	1.78728e-10	5.83867e-09	0.884	1	-0.116	164	20	251	0	80	74	3.38754e-08	8.56243e-07	0.884	1	-0.116	164	20	255	0	80	74	2.90095e-08
ENSG00000144713	RPL32	chr3	-	12880847	12881083	12880847	12881029	12881640	12881741	6	212	39	243	127	74	5.63055e-06	0.000109026	0.016	0.086	-0.07	6	212	62	359	127	74	3.4918e-07	7.60465e-06	0.016	0.091	-0.075	6	212	87	396	127	74	7.81339e-10	2.35093e-08	0.016	0.113	-0.097	6	212	56	290	127	74	7.31714e-08
ENSG00000178035	IMPDH2	chr3	-	49061775	49062011	49061775	49061974	49062091	49062235	1037	87	689	0	110	74	0	0	0.889	1	-0.111	1037	87	1009	0	110	74	0	0	0.889	1	-0.111	1037	87	929	0	110	74	0	0	0.889	1	-0.111	1037	87	770	0	110	74	0
ENSG00000163681	SLMAP	chr3	+	57898107	57898428	57898230	57898428	57894802	57894877	64	5	105	0	147	74	0.00530727	0.0406655	0.866	1	-0.134	64	5	143	0	147	74	0.00215815	0.0184241	0.866	1	-0.134	64	5	102	0	147	74	0.00576085	0.0415748	0.866	1	-0.134	64	5	124	0	147	74	0.0032862
ENSG00000154175	ABI3BP	chr3	-	100493448	100493517	100493448	100493483	100494050	100494179	261	44	60	0	107	74	0.00010223	0.00147424	0.804	1	-0.196	261	44	301	0	107	74	1.89848e-14	8.37109e-13	0.804	1	-0.196	261	44	807	0	107	74	0	0	0.804	1	-0.196	261	44	86	0	107	74	4.1939e-06
ENSG00000144802	NFKBIZ	chr3	+	101574238	101574302	101574247	101574302	101573905	101574052	549	73	133	0	82	74	2.28045e-07	5.49432e-06	0.872	1	-0.128	549	73	1096	0	82	74	0	0	0.872	1	-0.128	549	73	386	0	82	74	4.44089e-16	2.03164e-14	0.872	1	-0.128	549	73	242	0	82	74	1.57908e-11
ENSG00000152952	PLOD2	chr3	-	145791073	145791139	145791073	145791130	145796902	145797044	431	37	790	0	82	74	8.54872e-15	4.27508e-13	0.913	1	-0.087	431	37	943	0	82	74	4.44089e-16	2.22069e-14	0.913	1	-0.087	431	37	527	0	82	74	5.92093e-12	2.13947e-10	0.913	1	-0.087	431	37	1197	0	82	74	0
ENSG00000163660	CCNL1	chr3	-	156867075	156867168	156867075	156867163	156867273	156867385	18	22	40	0	78	74	2.24993e-09	6.96152e-08	0.437	1	-0.563	18	22	136	0	78	74	0	0	0.437	1	-0.563	18	22	89	0	78	74	1.95399e-14	8.21832e-13	0.437	1	-0.563	18	22	82	0	78	74	7.21645e-14
ENSG00000114416	FXR1	chr3	+	180680815	180680878	180680822	180680878	180680670	180680728	302	33	197	5	80	74	0.000589128	0.00666521	0.894	0.973	-0.079	302	33	462	13	80	74	1.97575e-05	0.000305704	0.894	0.97	-0.076	302	33	320	3	80	74	7.29603e-08	1.77809e-06	0.894	0.99	-0.096	302	33	298	5	80	74	4.28107e-06
ENSG00000125386	FAM193A	chr4	+	2648411	2648559	2648416	2648559	2641461	2641586	26	7	76	0	78	74	8.57114e-05	0.00127305	0.779	1	-0.221	26	7	79	3	78	74	0.00543853	0.038851	0.779	0.962	-0.183	26	7	37	0	78	74	0.00188515	0.0169123	0.779	1	-0.221	26	7	68	0	78	74	0.000142585
ENSG00000109814	UGDH	chr4	-	39522970	39523164	39522970	39523139	39528902	39529057	1	359	76	398	98	74	0	0	0.002	0.126	-0.124	1	359	46	456	98	74	4.98778e-10	1.5748e-08	0.002	0.071	-0.069	1	359	27	213	98	74	4.70263e-10	1.46569e-08	0.002	0.087	-0.085	1	359	53	681	98	74	2.59684e-08
ENSG00000138760	SCARB2	chr4	-	77100669	77100858	77100669	77100706	77102106	77102254	191	14	496	0	147	74	5.64577e-08	1.48226e-06	0.873	1	-0.127	191	14	421	3	147	74	2.25131e-05	0.000342421	0.873	0.986	-0.113	191	14	352	2	147	74	2.43601e-05	0.000379438	0.873	0.989	-0.116	191	14	283	0	147	74	3.82605e-06
ENSG00000164024	METAP1	chr4	+	99969883	99970027	99969888	99970027	99966329	99966461	79	6	150	0	78	74	0.00229831	0.0207231	0.926	1	-0.074	79	6	128	0	78	74	0.00353417	0.0275681	0.926	1	-0.074	79	6	128	0	78	74	0.00353417	0.0281116	0.926	1	-0.074	79	6	119	0	78	74	0.00430488
ENSG00000145349	CAMK2D	chr4	-	114430793	114430831	114430793	114430828	114434483	114434526	32	31	81	26	76	74	0.00107006	0.0109855	0.501	0.752	-0.251	32	31	138	41	76	74	0.000143521	0.00179171	0.501	0.766	-0.265	32	31	119	19	76	74	1.90923e-07	4.40587e-06	0.501	0.859	-0.358	32	31	71	17	76	74	0.000117424
ENSG00000062194	GPBP1	chr5	+	56545280	56545403	56545283	56545403	56542901	56543042	0	10	43	0	76	74	4.83102e-11	1.81194e-09	0	1	-1	0	10	59	23	76	74	8.81231e-06	0.000148828	0	0.714	-0.714	0	10	41	26	76	74	0.000147514	0.00189181	0	0.606	-0.606	0	10	51	20	76	74	1.08945e-05
ENSG00000188725	SMIM15	chr5	-	60455748	60456026	60455748	60455892	60456914	60457054	116	7	489	0	147	74	3.06265e-05	0.000502088	0.893	1	-0.107	116	7	382	0	147	74	7.26685e-05	0.000982997	0.893	1	-0.107	116	7	299	0	147	74	0.000179689	0.00224913	0.893	1	-0.107	116	7	403	0	147	74	5.99271e-05
ENSG00000164176	EDIL3	chr5	-	83525672	83525702	83525672	83525696	83680125	83680611	211	49	471	0	79	74	0	0	0.801	1	-0.199	211	49	207	0	79	74	4.30767e-14	1.8493e-12	0.801	1	-0.199	211	49	116	0	79	74	1.83783e-09	5.27609e-08	0.801	1	-0.199	211	49	236	0	79	74	2.44249e-15
ENSG00000129596	CDO1	chr5	-	115146857	115147009	115146857	115146972	115148877	115148955	69	27	72	0	110	74	2.12914e-08	5.9116e-07	0.632	1	-0.368	69	27	80	2	110	74	7.54118e-07	1.53064e-05	0.632	0.964	-0.332	69	27	66	5	110	74	0.000393916	0.00449542	0.632	0.899	-0.267	69	27	105	5	110	74	1.99052e-06
ENSG00000129596	CDO1	chr5	-	115146857	115147012	115146857	115146972	115148877	115148955	296	27	202	0	113	74	1.06012e-06	2.29691e-05	0.878	1	-0.122	296	27	276	2	113	74	2.246e-06	4.21466e-05	0.878	0.989	-0.111	296	27	248	5	113	74	0.000510981	0.00567008	0.878	0.97	-0.092	296	27	312	5	113	74	4.46888e-05
ENSG00000120708	TGFBI	chr5	+	135382023	135382704	135382539	135382704	135379746	135379811	629	20	525	0	147	74	1.85163e-05	0.00031847	0.941	1	-0.059	629	20	484	0	147	74	3.16348e-05	0.000468425	0.941	1	-0.059	629	20	826	0	147	74	7.49463e-07	1.55313e-05	0.941	1	-0.059	629	20	466	0	147	74	4.0392e-05
ENSG00000131504	DIAPH1	chr5	-	140956322	140956438	140956322	140956398	140957041	140957158	97	8	331	0	113	74	1.79211e-05	0.000309425	0.888	1	-0.112	97	8	199	0	113	74	0.000158218	0.00194936	0.888	1	-0.112	97	8	151	0	113	74	0.000504766	0.00561306	0.888	1	-0.112	97	8	221	0	113	74	0.00010085
ENSG00000145901	TNIP1	chr5	-	150410141	150410234	150410141	150410232	150411847	150411961	217	34	89	0	75	74	1.03928e-05	0.000190495	0.863	1	-0.137	217	34	203	0	75	74	8.00449e-10	2.48347e-08	0.863	1	-0.137	217	34	107	0	75	74	1.82185e-06	3.54535e-05	0.863	1	-0.137	217	34	114	0	75	74	9.53745e-07
ENSG00000197043	ANXA6	chr5	-	150513987	150514044	150513987	150514036	150515816	150515896	197	10	314	0	81	74	0.000355904	0.00436398	0.947	1	-0.053	197	10	201	0	81	74	0.00168108	0.0149725	0.947	1	-0.053	197	10	165	0	81	74	0.0032668	0.0264664	0.947	1	-0.053	197	10	137	0	81	74	0.0059237
ENSG00000169045	HNRNPH1	chr5	-	179041686	179041960	179041686	179041778	179042546	179042622	1141	223	1868	228	147	74	3.85277e-06	7.68531e-05	0.72	0.805	-0.085	1141	223	2749	255	147	74	7.49401e-14	3.14924e-12	0.72	0.844	-0.124	1141	223	1603	185	147	74	7.81403e-07	1.61291e-05	0.72	0.813	-0.093	1141	223	1662	181	147	74	4.63816e-08
ENSG00000112149	CD83	chr6	+	14133879	14133986	14133893	14133986	14131750	14131979	273	23	168	0	87	74	2.23144e-05	0.00037761	0.91	1	-0.09	273	23	276	0	87	74	3.43245e-07	7.49363e-06	0.91	1	-0.09	273	23	97	0	87	74	0.000761297	0.0079092	0.91	1	-0.09	273	23	153	0	87	74	4.41354e-05
ENSG00000204469	PRRC2A	chr6	+	31604286	31604385	31604337	31604385	31603985	31604196	257	9	545	0	124	74	0.000240658	0.00311338	0.945	1	-0.055	257	9	467	0	124	74	0.000388842	0.00432363	0.945	1	-0.055	257	9	276	0	124	74	0.00218425	0.0192425	0.945	1	-0.055	257	9	332	0	124	74	0.00118997
ENSG00000243649	CFB	chr6	+	31918920	31919021	31918970	31919021	31918644	31918721	1614	163	250	7	123	74	8.74764e-05	0.00129067	0.856	0.956	-0.1	1614	163	190	4	123	74	9.71416e-05	0.00126936	0.856	0.966	-0.11	1614	163	87	0	123	74	0.000142475	0.0018347	0.856	1	-0.144	1614	163	55	0	123	74	0.0027749
ENSG00000204351	SKIV2L	chr6	+	31935049	31935154	31935092	31935154	31934759	31934918	87	9	165	0	116	74	7.14192e-05	0.00107987	0.86	1	-0.14	87	9	85	0	116	74	0.00153663	0.0139144	0.86	1	-0.14	87	9	66	0	116	74	0.0041515	0.0321875	0.86	1	-0.14	87	9	87	0	116	74	0.00139495
ENSG00000204248	COL11A2	chr6	-	33145908	33145962	33145908	33145952	33146084	33146129	14599	767	20082	0	83	74	0	0	0.944	1	-0.056	14599	767	22395	1	83	74	0	0	0.944	1	-0.056	14599	767	14481	2	83	74	0	0	0.944	1	-0.056	14599	767	20537	0	83	74	0
ENSG00000096433	ITPR3	chr6	+	33653419	33653604	33653571	33653604	33653135	33653310	383	13	423	0	147	74	0.000139776	0.00192994	0.937	1	-0.063	383	13	657	0	147	74	1.51127e-05	0.000240487	0.937	1	-0.063	383	13	300	0	147	74	0.00070534	0.00741152	0.937	1	-0.063	383	13	466	0	147	74	8.64131e-05
ENSG00000096433	ITPR3	chr6	+	33657014	33657187	33657091	33657187	33656432	33656558	517	17	529	0	147	74	2.22266e-05	0.000376839	0.939	1	-0.061	517	17	797	0	147	74	1.64255e-06	3.16182e-05	0.939	1	-0.061	517	17	337	0	147	74	0.00029614	0.00352619	0.939	1	-0.061	517	17	587	0	147	74	1.16371e-05
ENSG00000270800	RP1-187N21.4	chr6	-	34256546	34256708	34256546	34256704	34261227	34261312	275	39	425	0	77	74	6.32827e-15	3.1825e-13	0.871	1	-0.129	275	39	325	0	77	74	8.91398e-13	3.49186e-11	0.871	1	-0.129	275	39	275	0	77	74	1.55096e-11	5.36865e-10	0.871	1	-0.129	275	39	265	0	77	74	2.84704e-11
ENSG00000112280	COL9A1	chr6	-	70944241	70944291	70944241	70944263	70944496	70944661	6	7	22	0	101	74	0.000157935	0.00215187	0.386	1	-0.614	6	7	940	0	101	74	3.28437e-12	1.23715e-10	0.386	1	-0.614	6	7	627	0	101	74	5.45997e-12	1.98206e-10	0.386	1	-0.614	6	7	10	0	101	74	0.00447355
ENSG00000112697	TMEM30A	chr6	-	75969062	75969206	75969062	75969197	75970539	75970627	362	31	972	2	82	74	4.28546e-14	2.06779e-12	0.913	0.998	-0.085	362	31	314	0	82	74	2.15336e-08	5.61128e-07	0.913	1	-0.087	362	31	228	0	82	74	6.78692e-07	1.41963e-05	0.913	1	-0.087	362	31	308	0	82	74	2.68949e-08
ENSG00000203875	SNHG5	chr6	-	86387512	86387617	86387512	86387560	86387671	86387750	2137	80	698	0	130	74	1.89219e-09	5.91617e-08	0.938	1	-0.062	2137	80	1853	0	130	74	0	0	0.938	1	-0.062	2137	80	2058	0	130	74	0	0	0.938	1	-0.062	2137	80	1212	0	130	74	5.71765e-14
ENSG00000203875	SNHG5	chr6	-	86387853	86388013	86387853	86387906	86388411	86388451	1746	2100	399	372	147	74	0.00129326	0.0129272	0.295	0.351	-0.056	1746	2100	2673	1037	147	74	0	0	0.295	0.565	-0.27	1746	2100	2681	1123	147	74	0	0	0.295	0.546	-0.251	1746	2100	1239	652	147	74	0
ENSG00000112306	RPS12	chr6	+	133136110	133136363	133136156	133136363	133135870	133135921	397	249	297	0	119	74	0	0	0.498	1	-0.502	397	249	574	0	119	74	0	0	0.498	1	-0.502	397	249	756	0	119	74	0	0	0.498	1	-0.502	397	249	763	0	119	74	0
ENSG00000112096	SOD2	chr6	-	160113692	160113895	160113692	160113889	160114176	160114260	7478	396	1965	0	79	74	0	0	0.946	1	-0.054	7478	396	3285	0	79	74	0	0	0.946	1	-0.054	7478	396	880	0	79	74	1.11022e-16	5.2479e-15	0.946	1	-0.054	7478	396	1872	0	79	74	0
ENSG00000157954	WIPI2	chr7	+	5256193	5256290	5256195	5256290	5254165	5254335	222	18	231	0	75	74	7.85245e-06	0.000146949	0.924	1	-0.076	222	18	283	0	75	74	1.81042e-06	3.44789e-05	0.924	1	-0.076	222	18	197	0	75	74	2.338e-05	0.000365804	0.924	1	-0.076	222	18	247	0	75	74	4.88119e-06
ENSG00000126524	SBDS	chr7	-	66459206	66459328	66459206	66459264	66460276	66460563	350	21	512	0	137	74	2.5412e-08	7.00123e-07	0.9	1	-0.1	350	21	570	2	137	74	1.77483e-07	4.02189e-06	0.9	0.994	-0.094	350	21	622	1	137	74	1.49806e-08	3.91296e-07	0.9	0.997	-0.097	350	21	472	0	137	74	5.61486e-08
ENSG00000233369	RP11-396K3.1	chr7	+	72618602	72618644	72618608	72618644	72617462	72617504	344	24	823	0	79	74	1.13089e-10	4.13724e-09	0.931	1	-0.069	344	24	332	0	79	74	5.76186e-07	1.1994e-05	0.931	1	-0.069	344	24	363	0	79	74	2.60517e-07	5.85639e-06	0.931	1	-0.069	344	24	341	0	79	74	4.55228e-07
ENSG00000164692	COL1A2	chr7	+	94058499	94058742	94058515	94058742	94057604	94057789	8768	560	3739	0	89	74	0	0	0.929	1	-0.071	8768	560	7286	0	89	74	0	0	0.929	1	-0.071	8768	560	22838	0	89	74	0	0	0.929	1	-0.071	8768	560	2638	0	89	74	0
ENSG00000070669	ASNS	chr7	-	97483891	97484066	97483891	97483992	97484664	97484771	5	138	36	200	147	74	0.000138132	0.0019102	0.018	0.083	-0.065	5	138	159	269	147	74	0	0	0.018	0.229	-0.211	5	138	42	65	147	74	1.92513e-13	7.72321e-12	0.018	0.245	-0.227	5	138	143	265	147	74	1.11022e-16
ENSG00000106366	SERPINE1	chr7	+	100780281	100780365	100780290	100780365	100778995	100779082	1346	88	417	0	82	74	6.47302e-10	2.17632e-08	0.932	1	-0.068	1346	88	2298	0	82	74	0	0	0.932	1	-0.068	1346	88	2338	0	82	74	0	0	0.932	1	-0.068	1346	88	2417	0	82	74	0
ENSG00000006459	JHDM1D	chr7	-	139796698	139796847	139796698	139796842	139797344	139797442	136	10	90	0	78	74	0.00528167	0.0405215	0.928	1	-0.072	136	10	327	0	78	74	2.97439e-05	0.00044299	0.928	1	-0.072	136	10	162	0	78	74	0.000574481	0.00627676	0.928	1	-0.072	136	10	332	0	78	74	2.79579e-05
ENSG00000006459	JHDM1D	chr7	-	139796698	139796875	139796698	139796842	139797344	139797442	146	10	89	0	106	74	0.00602751	0.0448371	0.911	1	-0.089	146	10	349	0	106	74	1.58677e-05	0.000250939	0.911	1	-0.089	146	10	183	0	106	74	0.000335368	0.00391288	0.911	1	-0.089	146	10	349	0	106	74	1.58677e-05
ENSG00000155660	PDIA4	chr7	-	148702988	148703145	148702988	148703133	148705250	148705402	235	17	901	0	85	74	1.56959e-09	5.01594e-08	0.923	1	-0.077	235	17	612	0	85	74	1.87502e-08	4.91459e-07	0.923	1	-0.077	235	17	441	0	85	74	2.00266e-07	4.60112e-06	0.923	1	-0.077	235	17	244	0	85	74	1.35761e-05
ENSG00000155660	PDIA4	chr7	-	148702988	148703148	148702988	148703133	148705250	148705402	237	17	847	0	88	74	1.94189e-09	6.06094e-08	0.921	1	-0.079	237	17	601	0	88	74	1.9703e-08	5.14924e-07	0.921	1	-0.079	237	17	435	0	88	74	2.13451e-07	4.87541e-06	0.921	1	-0.079	237	17	235	0	88	74	1.74964e-05
ENSG00000104388	RAB2A	chr8	+	61497281	61497374	61497316	61497374	61496766	61496849	408	19	575	0	108	74	6.93283e-07	1.52994e-05	0.936	1	-0.064	408	19	449	0	108	74	4.11343e-06	7.36386e-05	0.936	1	-0.064	408	19	383	0	108	74	1.23442e-05	0.000204594	0.936	1	-0.064	408	19	460	0	108	74	3.46687e-06
ENSG00000120533	ENY2	chr8	+	110352672	110352792	110352729	110352792	110351548	110351619	12	58	37	0	130	74	0	0	0.105	1	-0.895	12	58	41	0	130	74	0	0	0.105	1	-0.895	12	58	28	0	130	74	1.55431e-15	6.92842e-14	0.105	1	-0.895	12	58	56	0	130	74	0
ENSG00000120533	ENY2	chr8	+	110352717	110352792	110352729	110352792	110351548	110351619	305	58	668	0	85	74	0	0	0.821	1	-0.179	305	58	363	0	85	74	0	0	0.821	1	-0.179	305	58	294	0	85	74	2.22045e-16	1.03705e-14	0.821	1	-0.179	305	58	409	0	85	74	0
ENSG00000120533	ENY2	chr8	+	110352719	110352792	110352729	110352792	110351548	110351619	36	58	94	0	83	74	0	0	0.356	1	-0.644	36	58	57	0	83	74	0	0	0.356	1	-0.644	36	58	45	0	83	74	9.76996e-15	4.18797e-13	0.356	1	-0.644	36	58	70	0	83	74	0
ENSG00000185122	HSF1	chr8	+	145537787	145537839	145537792	145537839	145537647	145537717	159	9	138	0	78	74	0.0044082	0.0353446	0.944	1	-0.056	159	9	194	0	78	74	0.00146736	0.0134161	0.944	1	-0.056	159	9	174	0	78	74	0.00209991	0.0186073	0.944	1	-0.056	159	9	148	0	78	74	0.00353831
ENSG00000159899	NPR2	chr9	+	35808751	35808850	35808808	35808850	35808505	35808680	63	8	146	0	130	74	6.35826e-05	0.000979414	0.818	1	-0.182	63	8	73	0	130	74	0.0015057	0.0136897	0.818	1	-0.182	63	8	66	0	130	74	0.00225945	0.0198047	0.818	1	-0.182	63	8	114	0	130	74	0.00021015
ENSG00000106809	OGN	chr9	-	95165515	95165764	95165515	95165583	95166777	95166895	629	27	200	0	147	74	0.000489459	0.00570014	0.921	1	-0.079	629	27	647	0	147	74	3.14594e-08	8.01118e-07	0.921	1	-0.079	629	27	2635	0	147	74	6.43929e-15	2.76783e-13	0.921	1	-0.079	629	27	264	2	147	74	0.00317739
ENSG00000197724	PHF2	chr9	+	96416694	96416857	96416703	96416857	96415460	96415647	42	7	105	0	82	74	0.000169952	0.0022986	0.844	1	-0.156	42	7	71	0	82	74	0.000844251	0.00851481	0.844	1	-0.156	42	7	64	0	82	74	0.00126427	0.0120467	0.844	1	-0.156	42	7	71	0	82	74	0.000844251
ENSG00000136938	ANP32B	chr9	+	100760837	100760960	100760857	100760960	100756912	100757062	4	14	31	0	93	74	3.04942e-09	9.243e-08	0.185	1	-0.815	4	14	22	0	93	74	8.7287e-08	2.05284e-06	0.185	1	-0.815	4	14	27	0	93	74	1.22379e-08	3.23437e-07	0.185	1	-0.815	4	14	20	0	93	74	2.09048e-07
ENSG00000204291	COL15A1	chr9	+	101806849	101806918	101806883	101806918	101804326	101804389	358	16	689	0	107	74	9.77064e-07	2.12986e-05	0.939	1	-0.061	358	16	679	0	107	74	1.06478e-06	2.0993e-05	0.939	1	-0.061	358	16	668	0	107	74	1.17249e-06	2.33691e-05	0.939	1	-0.061	358	16	367	0	107	74	4.16022e-05
ENSG00000251349	MSANTD3-TMEFF1	chr9	+	103278956	103279053	103278959	103279053	103275588	103275615	17	6	65	0	76	74	0.000108806	0.00155276	0.734	1	-0.266	17	6	46	0	76	74	0.000456811	0.0049794	0.734	1	-0.266	17	6	22	0	76	74	0.00693302	0.0480186	0.734	1	-0.266	17	6	23	0	76	74	0.00599587
ENSG00000119326	CTNNAL1	chr9	-	111714723	111714774	111714723	111714771	111718069	111718107	281	53	364	33	76	74	0.00166977	0.015882	0.838	0.915	-0.077	281	53	459	42	76	74	0.0010123	0.00991364	0.838	0.914	-0.076	281	53	455	23	76	74	1.349e-07	3.17869e-06	0.838	0.951	-0.113	281	53	481	40	76	74	0.000226067
ENSG00000196739	COL27A1	chr9	+	117047003	117047057	117047013	117047057	117045988	117046042	436	25	1295	0	83	74	2.8648e-11	1.09519e-09	0.94	1	-0.06	436	25	647	0	83	74	1.07467e-08	2.90615e-07	0.94	1	-0.06	436	25	509	0	83	74	9.61799e-08	2.29745e-06	0.94	1	-0.06	436	25	679	0	83	74	6.89061e-09
ENSG00000041982	TNC	chr9	-	117846487	117846751	117846487	117846736	117848142	117849552	2036	219	1096	0	88	74	0	0	0.887	1	-0.113	2036	219	1422	0	88	74	0	0	0.887	1	-0.113	2036	219	1162	0	88	74	0	0	0.887	1	-0.113	2036	219	725	0	88	74	0
ENSG00000044574	HSPA5	chr9	-	128002954	128003186	128002954	128003153	128003283	128003609	2690	183	6669	0	106	74	0	0	0.911	1	-0.089	2690	183	12470	0	106	74	0	0	0.911	1	-0.089	2690	183	11676	0	106	74	0	0	0.911	1	-0.089	2690	183	5032	0	106	74	0
ENSG00000165169	DYNLT3	chrX	-	37700280	37700358	37700280	37700346	37701034	37701158	91	10	116	0	85	74	0.000271146	0.00347009	0.888	1	-0.112	91	10	361	0	85	74	7.84742e-07	1.58382e-05	0.888	1	-0.112	91	10	82	0	85	74	0.00130049	0.0123617	0.888	1	-0.112	91	10	94	0	85	74	0.000717607
ENSG00000130985	UBA1	chrX	+	47060876	47061009	47060952	47061009	47060674	47060765	254	10	663	0	147	74	1.84511e-05	0.000317655	0.927	1	-0.073	254	10	282	0	147	74	0.00069236	0.00717282	0.927	1	-0.073	254	10	234	0	147	74	0.00145822	0.0135886	0.927	1	-0.073	254	10	243	0	147	74	0.0012583
ENSG00000102100	SLC35A2	chrX	-	48762022	48762759	48762022	48762169	48763668	48763820	73	39	285	64	147	74	0.00045496	0.00536841	0.485	0.692	-0.207	73	39	223	38	147	74	1.93804e-05	0.000300648	0.485	0.747	-0.262	73	39	170	17	147	74	6.316e-08	1.54648e-06	0.485	0.834	-0.349	73	39	171	34	147	74	0.000313294
ENSG00000068308	OTUD5	chrX	-	48780413	48780575	48780413	48780572	48780909	48781023	5	100	23	112	76	74	0.0023942	0.0214684	0.046	0.167	-0.121	5	100	26	136	76	74	0.0033406	0.0263683	0.046	0.157	-0.111	5	100	15	72	76	74	0.00496228	0.036901	0.046	0.169	-0.123	5	100	30	99	76	74	3.8201e-05
ENSG00000126012	KDM5C	chrX	-	53226952	53227058	53226952	53227049	53227671	53227819	191	10	226	0	82	74	0.000922542	0.00971116	0.945	1	-0.055	191	10	302	0	82	74	0.000325221	0.00371782	0.945	1	-0.055	191	10	166	0	82	74	0.00271766	0.0229965	0.945	1	-0.055	191	10	182	0	82	74	0.00198245
ENSG00000166681	NGFRAP1	chrX	+	102632390	102633005	102632437	102633005	102631955	102632034	30	257	103	308	120	74	6.8654e-07	1.51693e-05	0.067	0.171	-0.104	30	257	64	199	120	74	1.46935e-05	0.000234024	0.067	0.166	-0.099	30	257	60	209	120	74	0.000144768	0.00185964	0.067	0.15	-0.083	30	257	49	118	120	74	5.50743e-07
ENSG00000077274	CAPN6	chrX	-	110492162	110492285	110492162	110492234	110494144	110494331	327	11	634	0	124	74	7.78473e-05	0.00116497	0.947	1	-0.053	327	11	629	0	124	74	8.01091e-05	0.00107038	0.947	1	-0.053	327	11	1194	0	124	74	1.35375e-05	0.000222254	0.947	1	-0.053	327	11	490	0	124	74	0.00020489
ENSG00000147403	RPL10	chrX	+	153627678	153627935	153627827	153627935	153626717	153626883	46	19	147	0	147	74	1.27145e-11	4.98883e-10	0.549	1	-0.451	46	19	121	0	147	74	1.61436e-10	5.2931e-09	0.549	1	-0.451	46	19	19	0	147	74	0.00220558	0.0193977	0.549	1	-0.451	46	19	61	0	147	74	4.06924e-07
ENSG00000071859	FAM50A	chrX	+	153678028	153678279	153678230	153678279	153677568	153677645	136	11	261	0	147	74	9.12044e-06	0.000168558	0.862	1	-0.138	136	11	170	0	147	74	0.000110504	0.0014232	0.862	1	-0.138	136	11	184	0	147	74	7.12442e-05	0.00100332	0.862	1	-0.138	136	11	147	0	147	74	0.000240261
ENSG00000130766	SESN2	chr1	+	28598794	28598977	28598828	28598977	28598184	28598382	98	0	63	9	107	74	0.000186313	0.00249158	1	0.829	0.171	98	0	367	43	107	74	3.35218e-05	0.000491891	1	0.855	0.145	98	0	162	28	107	74	2.16434e-06	4.14484e-05	1	0.8	0.2	98	0	261	30	107	74	5.97223e-05
ENSG00000086015	MAST2	chr1	+	46348035	46348067	46348038	46348067	46295110	46295253	72	0	80	15	76	74	7.00494e-05	0.00106433	1	0.839	0.161	72	0	151	23	76	74	0.000122294	0.00155933	1	0.865	0.135	72	0	113	10	76	74	0.00558784	0.0407253	1	0.917	0.083	72	0	131	11	76	74	0.00621844
ENSG00000077254	USP33	chr1	-	78187515	78187610	78187515	78187586	78187708	78187881	23	0	93	48	97	74	9.15668e-05	0.00134436	1	0.596	0.404	23	0	20	16	97	74	3.76734e-05	0.000547427	1	0.488	0.512	23	0	21	10	97	74	0.00103987	0.0102238	1	0.616	0.384	23	0	30	10	97	74	0.00370359
ENSG00000155363	MOV10	chr1	+	113242079	113242432	113242306	113242432	113241336	113241411	47	48	15	201	147	74	1.11022e-16	5.97012e-15	0.33	0.036	0.294	47	48	50	133	147	74	0.000287255	0.00332414	0.33	0.159	0.171	47	48	26	64	147	74	0.00426438	0.0328672	0.33	0.17	0.16	47	48	19	114	147	74	8.415e-09
ENSG00000117139	KDM5B	chr1	-	202714985	202715110	202714985	202715104	202715269	202715451	84	0	159	22	79	74	8.64746e-05	0.00127968	1	0.871	0.129	84	0	358	75	79	74	2.76144e-07	6.0956e-06	1	0.817	0.183	84	0	204	33	79	74	1.33514e-05	0.000219659	1	0.853	0.147	84	0	326	39	79	74	0.000121468
ENSG00000197746	PSAP	chr10	-	73583644	73583653	73583644	73583650	73585593	73585650	144	0	199	14	76	74	0.000635917	0.00709887	1	0.933	0.067	144	0	126	9	76	74	0.00137872	0.0127819	1	0.932	0.068	144	0	129	7	76	74	0.00711947	0.049071	1	0.947	0.053	144	0	147	20	76	74	2.002e-06
ENSG00000161638	ITGA5	chr12	-	54796970	54797563	54796970	54797108	54797694	54797750	1181	0	1325	36	147	74	8.71154e-09	2.51256e-07	1	0.949	0.051	1181	0	1579	52	147	74	2.0109e-11	7.14269e-10	1	0.939	0.061	1181	0	1052	35	147	74	2.95145e-10	9.40496e-09	1	0.938	0.062	1181	0	1695	48	147	74	7.60828e-10
ENSG00000175197	DDIT3	chr12	-	57911051	57911221	57911051	57911207	57911488	57911536	334	20	100	20	87	74	0.00047136	0.0055254	0.934	0.81	0.124	334	20	498	96	87	74	5.55065e-07	1.15948e-05	0.934	0.815	0.119	334	20	362	86	87	74	5.28361e-09	1.45031e-07	0.934	0.782	0.152	334	20	509	97	87	74	6.9682e-07
ENSG00000175197	DDIT3	chr12	-	57911051	57911242	57911051	57911207	57911488	57911536	333	20	112	20	108	74	0.00145877	0.0141849	0.919	0.793	0.126	333	20	573	96	108	74	1.30439e-05	0.000210371	0.919	0.804	0.115	333	20	395	86	108	74	5.34216e-08	1.31835e-06	0.919	0.759	0.16	333	20	544	97	108	74	3.36954e-06
ENSG00000175197	DDIT3	chr12	-	57911051	57911270	57911051	57911207	57911488	57911536	353	20	132	20	136	74	0.0037421	0.0309152	0.906	0.782	0.124	353	20	658	96	136	74	6.02235e-05	0.00082805	0.906	0.789	0.117	353	20	450	86	136	74	2.76968e-07	6.19948e-06	0.906	0.74	0.166	353	20	608	97	136	74	9.82132e-06
ENSG00000175197	DDIT3	chr12	-	57911051	57911325	57911051	57911207	57911488	57911536	356	20	140	20	147	74	0.00579012	0.0434697	0.9	0.779	0.121	356	20	698	96	147	74	0.000152548	0.00188599	0.9	0.785	0.115	356	20	485	86	147	74	1.25581e-06	2.49346e-05	0.9	0.74	0.16	356	20	631	97	147	74	1.76141e-05
ENSG00000175197	DDIT3	chr12	-	57911051	57911378	57911051	57911207	57911488	57911536	373	20	140	20	147	74	0.00378795	0.0311929	0.904	0.779	0.125	373	20	711	96	147	74	8.80673e-05	0.00116353	0.904	0.789	0.115	373	20	503	86	147	74	9.42128e-07	1.91435e-05	0.904	0.746	0.158	373	20	644	97	147	74	9.79225e-06
ENSG00000165801	ARHGEF40	chr14	+	21549031	21550278	21549667	21550278	21548818	21548941	183	0	391	26	147	74	3.86643e-05	0.000625907	1	0.883	0.117	183	0	224	16	147	74	5.98959e-05	0.000824178	1	0.876	0.124	183	0	148	9	147	74	0.000592631	0.00645704	1	0.892	0.108	183	0	123	13	147	74	6.94431e-06
ENSG00000179335	CLK3	chr15	+	74914460	74914901	74914834	74914901	74912349	74912566	232	4	173	28	147	74	4.4269e-07	1.00551e-05	0.967	0.757	0.21	232	4	417	29	147	74	0.00287561	0.0232042	0.967	0.879	0.088	232	4	274	39	147	74	5.35922e-07	1.14393e-05	0.967	0.78	0.187	232	4	231	36	147	74	2.0625e-07
ENSG00000172183	ISG20	chr15	+	89195349	89195541	89195400	89195541	89182573	89182825	49	31	0	12	124	74	2.45501e-05	0.000411929	0.485	0	0.485	49	31	0	23	124	74	1.05843e-08	2.86657e-07	0.485	0	0.485	49	31	0	11	124	74	5.33051e-05	0.000770093	0.485	0	0.485	49	31	0	22	124	74	2.03204e-08
ENSG00000140632	GLYR1	chr16	-	4864537	4864648	4864537	4864630	4867598	4867693	37	0	202	39	91	74	0.00121366	0.0122623	1	0.808	0.192	37	0	35	7	91	74	0.00499625	0.0363294	1	0.803	0.197	37	0	33	12	91	74	0.000178911	0.00224298	1	0.691	0.309	37	0	51	9	91	74	0.00549884
ENSG00000205336	GPR56	chr16	+	57693306	57693593	57693324	57693593	57691284	57691403	332	391	189	351	91	74	9.44768e-05	0.00137914	0.408	0.305	0.103	332	391	166	373	91	74	4.78727e-08	1.17722e-06	0.408	0.266	0.142	332	391	98	251	91	74	1.63026e-08	4.23002e-07	0.408	0.241	0.167	332	391	117	248	91	74	1.02428e-05
ENSG00000103335	PIEZO1	chr16	-	88782340	88782527	88782340	88782492	88782605	88782685	586	0	1279	70	108	74	5.26265e-11	1.96969e-09	1	0.926	0.074	586	0	1144	66	108	74	2.21965e-11	7.82207e-10	1	0.922	0.078	586	0	668	33	108	74	1.29523e-08	3.41739e-07	1	0.933	0.067	586	0	893	78	108	74	2.22045e-16
ENSG00000175826	CTDNEP1	chr17	-	7147869	7148014	7147869	7147954	7149344	7149456	23	0	27	16	133	74	0.000180411	0.00241808	1	0.484	0.516	23	0	27	29	133	74	1.33853e-06	2.61029e-05	1	0.341	0.659	23	0	33	18	133	74	0.00022146	0.00271336	1	0.505	0.495	23	0	21	14	133	74	0.000134904
ENSG00000261915	GPS2	chr17	-	7217806	7217916	7217806	7217881	7218277	7218438	128	0	389	34	108	74	5.56705e-05	0.000867497	1	0.887	0.113	128	0	150	8	108	74	0.00600564	0.0421454	1	0.928	0.072	128	0	142	18	108	74	9.79162e-06	0.000165264	1	0.844	0.156	128	0	160	11	108	74	0.00128563
ENSG00000264772	RP11-186B7.4	chr17	+	7479841	7480008	7479847	7480008	7478436	7478576	777	0	1279	319	79	74	0	0	1	0.79	0.21	777	0	831	287	79	74	0	0	1	0.731	0.269	777	0	886	235	79	74	0	0	1	0.779	0.221	777	0	870	206	79	74	0
ENSG00000141030	COPS3	chr17	-	17171198	17171359	17171198	17171291	17174209	17174322	25	0	41	12	141	74	0.00352971	0.0295019	1	0.642	0.358	25	0	65	20	141	74	0.0018027	0.0158351	1	0.63	0.37	25	0	65	17	141	74	0.00396393	0.0309943	1	0.667	0.333	25	0	34	12	141	74	0.00175054
ENSG00000109046	WSB1	chr17	+	25634769	25636298	25636125	25636298	25633807	25633908	1062	17	323	121	147	74	0	0	0.969	0.573	0.396	1062	17	2999	212	147	74	1.23535e-12	4.75595e-11	0.969	0.877	0.092	1062	17	979	117	147	74	0	0	0.969	0.808	0.161	1062	17	1311	68	147	74	2.69088e-06
ENSG00000179218	CALR	chr19	+	13049947	13050049	13050011	13050049	13049420	13049584	1373	0	3648	106	137	74	7.01994e-13	3.09449e-11	1	0.949	0.051	1373	0	2375	95	137	74	1.11022e-16	5.66245e-15	1	0.931	0.069	1373	0	2224	79	137	74	1.22125e-14	5.20643e-13	1	0.938	0.062	1373	0	1331	46	137	74	2.48723e-12
ENSG00000008441	NFIX	chr19	+	13192493	13192669	13192511	13192669	13189426	13189549	89	0	178	24	91	74	5.56854e-05	0.000867497	1	0.858	0.142	89	0	103	15	91	74	8.22156e-05	0.00109429	1	0.848	0.152	89	0	129	17	91	74	0.000119676	0.00157747	1	0.861	0.139	89	0	73	8	91	74	0.00136735
ENSG00000184162	NR2C2AP	chr19	-	19312739	19312856	19312739	19312850	19313139	19313207	10	0	19	47	79	74	1.43087e-05	0.000253426	1	0.275	0.725	10	0	5	16	79	74	4.46766e-05	0.000638309	1	0.226	0.774	10	0	2	19	79	74	1.07365e-06	2.14812e-05	1	0.09	0.91	10	0	4	30	79	74	3.01618e-07
ENSG00000170889	RPS9	chr19	+	54710420	54711515	54711265	54711515	54710143	54710330	673	66	70	312	147	74	0	0	0.837	0.101	0.736	673	66	733	168	147	74	1.27172e-08	3.41323e-07	0.837	0.687	0.15	673	66	774	190	147	74	2.90937e-10	9.28979e-09	0.837	0.672	0.165	673	66	417	387	147	74	0
ENSG00000115594	IL1R1	chr2	+	102791937	102792105	102792030	102792105	102791046	102791190	227	0	781	170	147	74	0	0	1	0.698	0.302	227	0	209	51	147	74	6.66134e-16	3.26716e-14	1	0.674	0.326	227	0	251	59	147	74	4.44089e-16	2.03164e-14	1	0.682	0.318	227	0	450	74	147	74	3.07088e-13
ENSG00000115652	UXS1	chr2	-	106729101	106729221	106729101	106729217	106739425	106739547	337	0	459	35	77	74	3.32618e-08	8.98371e-07	1	0.926	0.074	337	0	136	11	77	74	8.0017e-06	0.000136295	1	0.922	0.078	337	0	136	8	77	74	0.000334357	0.00390399	1	0.942	0.058	337	0	195	14	77	74	5.57812e-06
ENSG00000196504	PRPF40A	chr2	-	153515461	153515523	153515461	153515488	153515606	153515703	139	0	269	24	108	74	4.25798e-05	0.000681162	1	0.885	0.115	139	0	190	16	108	74	0.000138387	0.00173731	1	0.891	0.109	139	0	137	18	108	74	3.80122e-06	6.97233e-05	1	0.839	0.161	139	0	155	18	108	74	1.03456e-05
ENSG00000173473	SMARCC1	chr3	-	47747898	47748020	47747898	47748016	47752172	47752298	92	0	188	28	77	74	1.66379e-05	0.000289228	1	0.866	0.134	92	0	120	12	77	74	0.000967579	0.00954358	1	0.906	0.094	92	0	95	10	77	74	0.00103248	0.0101726	1	0.901	0.099	92	0	117	16	77	74	9.49591e-05
ENSG00000163938	GNL3	chr3	+	52724607	52725087	52724960	52725087	52723089	52723222	362	0	658	33	147	74	8.81437e-07	1.9332e-05	1	0.909	0.091	362	0	525	50	147	74	1.14107e-11	4.12674e-10	1	0.841	0.159	362	0	327	32	147	74	1.11222e-10	3.68681e-09	1	0.837	0.163	362	0	556	46	147	74	2.23103e-10
ENSG00000183624	C3orf37	chr3	+	129020792	129020985	129020890	129020985	129017196	129017378	133	0	155	17	147	74	2.21293e-05	0.000375545	1	0.821	0.179	133	0	90	17	147	74	2.6971e-07	5.96092e-06	1	0.727	0.273	133	0	80	15	147	74	5.32913e-07	1.13907e-05	1	0.729	0.271	133	0	76	12	147	74	5.4236e-06
ENSG00000017260	ATP2C1	chr3	+	130715523	130715640	130715596	130715640	130714886	130714955	112	0	224	13	146	74	0.0033654	0.0282874	1	0.897	0.103	112	0	159	18	146	74	5.3217e-05	0.000746038	1	0.817	0.183	112	0	115	16	146	74	1.66978e-05	0.000269259	1	0.785	0.215	112	0	128	14	146	74	0.000114078
ENSG00000062194	GPBP1	chr5	+	56545235	56545403	56545280	56545403	56542901	56543042	310	0	315	43	118	74	7.70162e-13	3.38662e-11	1	0.821	0.179	310	0	563	59	118	74	1.98999e-11	7.08245e-10	1	0.857	0.143	310	0	395	41	118	74	1.4863e-10	4.86498e-09	1	0.858	0.142	310	0	345	51	118	74	3.9968e-14
ENSG00000204469	PRRC2A	chr6	+	31604509	31604913	31604818	31604913	31604337	31604385	226	0	336	12	147	74	0.00201805	0.0185808	1	0.934	0.066	226	0	303	27	147	74	3.36661e-07	7.36786e-06	1	0.85	0.15	226	0	196	16	147	74	4.92944e-06	8.86506e-05	1	0.86	0.14	226	0	187	37	147	74	7.82041e-13
ENSG00000204248	COL11A2	chr6	-	33134846	33135088	33134846	33134900	33135202	33135310	3856	178	172	120	147	74	0	0	0.916	0.419	0.497	3856	178	228	212	147	74	0	0	0.916	0.351	0.565	3856	178	130	196	147	74	0	0	0.916	0.25	0.666	3856	178	160	239	147	74	0
ENSG00000204248	COL11A2	chr6	-	33136299	33136536	33136299	33136349	33136731	33136785	18327	0	23786	860	147	74	0	0	1	0.933	0.067	18327	0	25411	1146	147	74	0	0	1	0.918	0.082	18327	0	16152	656	147	74	0	0	1	0.925	0.075	18327	0	23652	915	147	74	0
ENSG00000198755	RPL10A	chr6	+	35437157	35437306	35437212	35437306	35436578	35436804	807	29	486	49	128	74	1.34937e-05	0.000240182	0.941	0.852	0.089	807	29	737	89	128	74	3.53005e-09	1.01112e-07	0.941	0.827	0.114	807	29	916	89	128	74	1.4774e-06	2.89666e-05	0.941	0.856	0.085	807	29	826	69	128	74	0.000113437
ENSG00000197594	ENPP1	chr6	+	132201019	132201174	132201024	132201174	132199681	132199733	126	0	667	120	78	74	3.04571e-09	9.243e-08	1	0.841	0.159	126	0	223	55	78	74	1.18983e-10	3.97395e-09	1	0.794	0.206	126	0	137	33	78	74	1.76189e-09	5.08609e-08	1	0.798	0.202	126	0	210	37	78	74	6.15951e-08
ENSG00000189043	NDUFA4	chr7	-	10977730	10977797	10977730	10977774	10978434	10978678	12	0	0	35	96	74	1.64714e-11	6.4206e-10	1	0	1	12	0	0	16	96	74	2.48924e-08	6.43966e-07	1	0	1	12	0	0	12	96	74	2.72394e-07	6.10583e-06	1	0	1	12	0	0	10	96	74	1.1254e-06
ENSG00000136261	BZW2	chr7	+	16725529	16725665	16725548	16725665	16722404	16722470	83	0	284	23	92	74	0.00202069	0.0185956	1	0.909	0.091	83	0	117	13	92	74	0.00073747	0.0075831	1	0.879	0.121	83	0	121	10	92	74	0.00398899	0.0311747	1	0.907	0.093	83	0	100	8	92	74	0.00590029
ENSG00000106397	PLOD3	chr7	-	100853812	100853954	100853812	100853923	100854871	100854953	257	0	739	33	104	74	9.19275e-05	0.00134855	1	0.941	0.059	257	0	399	36	104	74	3.74374e-08	9.41297e-07	1	0.887	0.113	257	0	323	19	104	74	2.63178e-05	0.000406083	1	0.924	0.076	257	0	353	24	104	74	3.67403e-06
ENSG00000105819	PMPCB	chr7	+	102944288	102944487	102944432	102944487	102940624	102940754	157	0	219	12	147	74	0.00113535	0.0115627	1	0.902	0.098	157	0	186	28	147	74	4.9168e-08	1.20741e-06	1	0.77	0.23	157	0	173	12	147	74	0.000328879	0.00385153	1	0.879	0.121	157	0	187	19	147	74	8.26733e-06
ENSG00000107104	KANK1	chr9	+	732377	734835	734747	734835	731157	731266	365	3	355	26	147	74	6.45998e-06	0.000123348	0.984	0.873	0.111	365	3	521	85	147	74	1.44329e-15	6.96436e-14	0.984	0.755	0.229	365	3	236	54	147	74	0	0	0.984	0.688	0.296	365	3	692	181	147	74	0
ENSG00000130956	HABP4	chr9	+	99227991	99228060	99227996	99228060	99227618	99227780	102	0	172	20	78	74	9.30251e-05	0.00136129	1	0.891	0.109	102	0	104	13	78	74	0.000142654	0.00178461	1	0.884	0.116	102	0	90	12	78	74	0.00011859	0.00156579	1	0.877	0.123	102	0	93	16	78	74	9.33859e-06
ENSG00000147403	RPL10	chrX	+	153628754	153628967	153628804	153628967	153628143	153628282	47	343	0	173	123	74	3.97764e-08	1.06466e-06	0.076	0	0.076	47	343	0	307	123	74	8.94307e-12	3.274e-10	0.076	0	0.076	47	343	0	373	123	74	3.11973e-13	1.2295e-11	0.076	0	0.076	47	343	0	259	123	74	1.37517e-10
[truncated: 4 more columns]

## Sheet: RI
GeneID	geneSymbol	chr	strand	riExonStart_0base	riExonEnd	upstreamES	upstreamEE	downstreamES	downstreamEE	IJC_SAMPLE_1 (R08-269A vs. 14 week control)	SJC_SAMPLE_1 (R08-269A vs. 14 week control)	IJC_SAMPLE_2 (R08-269A vs. 14 week control)	SJC_SAMPLE_2 (R08-269A vs. 14 week control)	IncFormLen (R08-269A vs. 14 week control)	SkipFormLen (R08-269A vs. 14 week control)	PValue (R08-269A vs. 14 week control)	FDR (R08-269A vs. 14 week control)	IncLevel1 (R08-269A vs. 14 week control)	IncLevel2 (R08-269A vs. 14 week control)	IncLevelDifference (R08-269A vs. 14 week control)	IJC_SAMPLE_1 (R08-269A vs. 14 week control)	SJC_SAMPLE_1 (R08-269A vs. 14 week control)	IJC_SAMPLE_2 (R08-269A vs. 14 week control)	SJC_SAMPLE_2 (R08-269A vs. 14 week control)	IncFormLen (R08-269A vs. 14 week control)	SkipFormLen (R08-269A vs. 14 week control)	PValue (R08-269A vs. 14 week control)	FDR (R08-269A vs. 14 week control)	IncLevel1 (R08-269A vs. 14 week control)	IncLevel2 (R08-269A vs. 14 week control)	IncLevelDifference (R08-269A vs. 14 week control)	IJC_SAMPLE_1 (R08-269A vs. 15 week control)	SJC_SAMPLE_1 (R08-269A vs. 15 week control)	IJC_SAMPLE_2 (R08-269A vs. 15 week control)	SJC_SAMPLE_2 (R08-269A vs. 15 week control)	IncFormLen (R08-269A vs. 15 week control)	SkipFormLen (R08-269A vs. 15 week control)	PValue (R08-269A vs. 15 week control)	FDR (R08-269A vs. 15 week control)	IncLevel1 (R08-269A vs. 15 week control)	IncLevel2 (R08-269A vs. 15 week control)	IncLevelDifference (R08-269A vs. 15 week control)	IJC_SAMPLE_1 (R08-269A vs. 18 week control)	SJC_SAMPLE_1 (R08-269A vs. 18 week control)	IJC_SAMPLE_2 (R08-269A vs. 18 week control)	SJC_SAMPLE_2 (R08-269A vs. 18 week control)	IncFormLen (R08-269A vs. 18 week control)	SkipFormLen (R08-269A vs. 18 week control)	PValue (R08-269A vs. 18 week control)
ENSG00000127054	CPSF3L	chr1	-	1247605	1248080	1247605	1247748	1248015	1248080	105	7	169	0	147	74	0.000976686	0.00902714	0.883	1	-0.117	105	7	142	0	147	74	0.00184126	0.00947737	0.883	1	-0.117	105	7	144	0	147	74	0.00175149	0.0102247	0.883	1	-0.117	105	7	91	0	147	74	0.00811561
ENSG00000127054	CPSF3L	chr1	-	1247972	1248329	1247972	1248080	1248166	1248329	17	191	78	229	147	74	2.6641e-07	6.05653e-06	0.043	0.146	-0.103	17	191	48	187	147	74	0.000221082	0.00150448	0.043	0.114	-0.071	17	191	46	154	147	74	2.88339e-05	0.000280922	0.043	0.131	-0.088	17	191	53	105	147	74	8.86015e-10
ENSG00000127054	CPSF3L	chr1	-	1248414	1248972	1248414	1248477	1248888	1248972	174	33	350	15	147	74	1.89932e-06	3.89396e-05	0.726	0.922	-0.196	174	33	327	0	147	74	4.66294e-15	1.43309e-13	0.726	1	-0.274	174	33	240	0	147	74	1.43774e-12	3.77179e-11	0.726	1	-0.274	174	33	215	0	147	74	9.4893e-12
ENSG00000117308	GALE	chr1	-	24124606	24125220	24124606	24124720	24125104	24125220	25	81	56	54	147	74	3.16081e-05	0.00048034	0.134	0.343	-0.209	25	81	78	30	147	74	4.83946e-13	1.24032e-11	0.134	0.567	-0.433	25	81	18	14	147	74	0.000775238	0.00515395	0.134	0.393	-0.259	25	81	28	38	147	74	0.0103378
ENSG00000117616	C1orf63	chr1	-	25570040	25571792	25570040	25570124	25571640	25571792	44	85	189	66	147	74	4.31877e-14	2.01233e-12	0.207	0.59	-0.383	44	85	305	95	147	74	0	0	0.207	0.618	-0.411	44	85	222	184	147	74	4.44267e-05	0.00040953	0.207	0.378	-0.171	44	85	194	81	147	74	4.69291e-12
ENSG00000197989	SNHG12	chr1	-	28906044	28907158	28906044	28906493	28907071	28907158	62	381	89	243	147	74	9.77879e-06	0.00017229	0.076	0.156	-0.08	62	381	183	548	147	74	4.26362e-06	4.26775e-05	0.076	0.144	-0.068	62	381	188	425	147	74	1.35502e-10	2.89178e-09	0.076	0.182	-0.106	62	381	159	378	147	74	3.53739e-09
ENSG00000116871	MAP7D1	chr1	+	36641799	36642182	36641799	36641922	36642018	36642182	32	34	156	34	147	74	3.37126e-07	7.51272e-06	0.321	0.698	-0.377	32	34	131	33	147	74	4.41444e-06	4.39501e-05	0.321	0.666	-0.345	32	34	162	29	147	74	1.84577e-08	3.01719e-07	0.321	0.738	-0.417	32	34	73	12	147	74	7.52527e-07
ENSG00000171793	CTPS1	chr1	+	41474330	41474562	41474330	41474386	41474465	41474562	2	41	62	195	147	74	0.00123634	0.0109945	0.024	0.138	-0.114	2	41	36	29	147	74	7.51987e-09	1.15872e-07	0.024	0.385	-0.361	2	41	11	29	147	74	0.00373798	0.0191274	0.024	0.16	-0.136	2	41	38	33	147	74	1.27019e-08
ENSG00000117410	ATP6V0B	chr1	+	44441508	44441845	44441508	44441646	44441761	44441845	5	11	24	5	147	74	0.000796159	0.00769939	0.186	0.707	-0.521	5	11	70	5	147	74	2.72702e-07	3.37447e-06	0.186	0.876	-0.69	5	11	64	9	147	74	1.07148e-05	0.000114107	0.186	0.782	-0.596	5	11	29	6	147	74	0.000482049
ENSG00000142937	RPS8	chr1	+	45243671	45244335	45243671	45243801	45244263	45244335	511	36	561	0	147	74	1.37643e-11	5.24346e-10	0.877	1	-0.123	511	36	1368	0	147	74	0	0	0.877	1	-0.123	511	36	1652	0	147	74	0	0	0.877	1	-0.123	511	36	973	0	147	74	8.88178e-16
ENSG00000173846	PLK3	chr1	+	45270010	45270451	45270010	45270173	45270321	45270451	13	128	14	29	147	74	0.000475347	0.00489946	0.049	0.196	-0.147	13	128	61	113	147	74	2.69866e-08	3.95361e-07	0.049	0.214	-0.165	13	128	48	54	147	74	1.546e-11	3.69528e-10	0.049	0.309	-0.26	13	128	17	56	147	74	0.0066567
ENSG00000137955	RABGGTB	chr1	+	76255636	76255959	76255636	76255742	76255836	76255959	88	116	212	40	147	74	0	0	0.276	0.727	-0.451	88	116	271	191	147	74	0.000222425	0.00150817	0.276	0.417	-0.141	88	116	183	122	147	74	0.000192139	0.00153768	0.276	0.43	-0.154	88	116	212	110	147	74	3.20082e-07
ENSG00000060718	COL11A1	chr1	-	103461427	103461598	103461427	103461457	103461544	103461598	2658	321	7806	0	147	74	0	0	0.807	1	-0.193	2658	321	6433	0	147	74	0	0	0.807	1	-0.193	2658	321	3887	0	147	74	0	0	0.807	1	-0.193	2658	321	6566	0	147	74	0
ENSG00000160741	CRTC2	chr1	-	153927348	153927642	153927348	153927465	153927540	153927642	2	82	12	67	147	74	0.00280099	0.0207244	0.012	0.083	-0.071	2	82	40	91	147	74	2.05798e-08	3.07881e-07	0.012	0.181	-0.169	2	82	38	88	147	74	3.29821e-08	5.17136e-07	0.012	0.179	-0.167	2	82	14	50	147	74	0.000124587
ENSG00000143543	JTB	chr1	-	153949168	153949489	153949168	153949247	153949451	153949489	451	15	553	0	147	74	2.44301e-05	0.000383668	0.938	1	-0.062	451	15	523	0	147	74	3.34954e-05	0.000270982	0.938	1	-0.062	451	15	609	0	147	74	1.40768e-05	0.000147286	0.938	1	-0.062	451	15	410	0	147	74	0.000127395
ENSG00000234741	GAS5	chr1	-	173833394	173833644	173833394	173833442	173833621	173833644	114	54	321	55	147	74	4.95401e-06	9.34138e-05	0.515	0.746	-0.231	114	54	382	71	147	74	1.18837e-05	0.00010701	0.515	0.73	-0.215	114	54	459	74	147	74	3.84291e-07	5.17974e-06	0.515	0.757	-0.242	114	54	345	78	147	74	0.000450203
ENSG00000234741	GAS5	chr1	-	173833394	173834420	173833394	173833442	173834366	173834420	97	54	293	20	147	74	5.88418e-15	2.85992e-13	0.475	0.881	-0.406	97	54	361	91	147	74	0.000164187	0.00115053	0.475	0.666	-0.191	97	54	402	86	147	74	6.2916e-06	7.00543e-05	0.475	0.702	-0.227	97	54	299	52	147	74	3.53346e-07
ENSG00000234741	GAS5	chr1	-	173833394	173834420	173833394	173833842	173834366	173834420	107	624	378	259	147	74	0	0	0.079	0.424	-0.345	107	624	425	607	147	74	0	0	0.079	0.261	-0.182	107	624	520	634	147	74	0	0	0.079	0.292	-0.213	107	624	333	570	147	74	0
ENSG00000234741	GAS5	chr1	-	173833621	173833842	173833621	173833644	173833812	173833842	98	99	316	62	147	74	0	0	0.333	0.72	-0.387	98	99	301	139	147	74	8.50044e-06	7.91928e-05	0.333	0.522	-0.189	98	99	351	139	147	74	8.02437e-08	1.1791e-06	0.333	0.56	-0.227	98	99	293	110	147	74	4.40819e-08
ENSG00000234741	GAS5	chr1	-	173834366	173834685	173834366	173834420	173834608	173834685	108	191	305	58	147	74	0	0	0.222	0.726	-0.504	108	191	394	282	147	74	1.55701e-10	3.00508e-09	0.222	0.413	-0.191	108	191	429	255	147	74	1.26565e-14	3.91189e-13	0.222	0.459	-0.237	108	191	341	218	147	74	3.19544e-12
ENSG00000143499	SMYD2	chr1	+	214504292	214507651	214504292	214504413	214505360	214507651	2	55	23	70	147	74	0.000263805	0.0030108	0.018	0.142	-0.124	2	55	41	44	147	74	7.13567e-10	1.25708e-08	0.018	0.319	-0.301	2	55	15	54	147	74	0.00182593	0.0104949	0.018	0.123	-0.105	2	55	20	42	147	74	2.23556e-05
ENSG00000026025	VIM	chr10	+	17277167	17278378	17277167	17277388	17278292	17278378	140	503	761	674	147	74	0	0	0.123	0.362	-0.239	140	503	1523	10	147	74	0	0	0.123	0.987	-0.864	140	503	1306	981	147	74	0	0	0.123	0.401	-0.278	140	503	824	722	147	74	0
ENSG00000107863	ARHGAP21	chr10	-	24889574	24889859	24889574	24889717	24889824	24889859	44	4	206	0	147	74	0.000969711	0.00897739	0.847	1	-0.153	44	4	245	0	147	74	0.000639922	0.00382938	0.847	1	-0.153	44	4	115	0	147	74	0.00425388	0.0214007	0.847	1	-0.153	44	4	192	0	147	74	0.00115385
ENSG00000122952	ZWINT	chr10	-	58119778	58120144	58119778	58119902	58120053	58120144	0	29	43	123	147	74	0.000196422	0.00233634	0	0.15	-0.15	0	29	16	39	147	74	0.000244467	0.00164579	0	0.171	-0.171	0	29	14	35	147	74	0.000349088	0.00261475	0	0.168	-0.168	0	29	17	27	147	74	1.96206e-05
ENSG00000096746	HNRNPH3	chr10	+	70096955	70098444	70096955	70097090	70098259	70098444	32	124	119	184	147	74	3.63838e-05	0.000545563	0.115	0.246	-0.131	32	124	383	322	147	74	3.88578e-15	1.20077e-13	0.115	0.375	-0.26	32	124	266	206	147	74	1.55431e-15	5.00544e-14	0.115	0.394	-0.279	32	124	165	143	147	74	3.19744e-12
ENSG00000120008	WDR11	chr10	+	122665387	122666367	122665387	122665533	122666287	122666367	4	22	87	113	147	74	0.00421287	0.0287556	0.084	0.279	-0.195	4	22	35	20	147	74	3.61981e-05	0.000289534	0.084	0.468	-0.384	4	22	29	20	147	74	0.000211676	0.00166676	0.084	0.422	-0.338	4	22	39	21	147	74	1.72333e-05
ENSG00000174775	HRAS	chr11	-	532241	532755	532241	532522	532630	532755	7	62	56	119	147	74	0.000208572	0.00247044	0.054	0.192	-0.138	7	62	36	62	147	74	6.30955e-05	0.000484132	0.054	0.226	-0.172	7	62	41	61	147	74	8.32243e-06	9.05216e-05	0.054	0.253	-0.199	7	62	36	47	147	74	3.13941e-06
ENSG00000130600	H19	chr11	-	2017105	2017421	2017105	2017121	2017308	2017421	5130	868	4115	0	147	74	0	0	0.748	1	-0.252	5130	868	6496	686	147	74	0	0	0.748	0.827	-0.079	5130	868	6933	0	147	74	0	0	0.748	1	-0.252	5130	868	4336	0	147	74	0
ENSG00000110619	CARS	chr11	-	3023199	3023830	3023199	3023283	3023770	3023830	69	254	149	287	147	74	0.000102408	0.00132426	0.12	0.207	-0.087	69	254	267	240	147	74	0	0	0.12	0.359	-0.239	69	254	119	116	147	74	5.60663e-13	1.53839e-11	0.12	0.341	-0.221	69	254	195	188	147	74	2.22045e-16
ENSG00000166471	TMEM41B	chr11	-	9302200	9305140	9302200	9302588	9304917	9305140	82	86	371	40	147	74	0	0	0.324	0.824	-0.5	82	86	345	105	147	74	7.97403e-11	1.5934e-09	0.324	0.623	-0.299	82	86	220	80	147	74	1.38759e-07	1.9742e-06	0.324	0.581	-0.257	82	86	275	106	147	74	1.84528e-07
ENSG00000129084	PSMA1	chr11	-	14535362	14536037	14535362	14535433	14535948	14536037	36	408	215	666	147	74	4.36318e-14	2.01636e-12	0.043	0.14	-0.097	36	408	211	368	147	74	0	0	0.043	0.224	-0.181	36	408	134	386	147	74	1.60094e-13	4.60421e-12	0.043	0.149	-0.106	36	408	176	382	147	74	0
ENSG00000213619	NDUFS3	chr11	+	47602076	47602536	47602076	47602174	47602386	47602536	4	115	65	246	147	74	7.58373e-07	1.6382e-05	0.017	0.117	-0.1	4	115	57	137	147	74	6.52597e-10	1.15688e-08	0.017	0.173	-0.156	4	115	55	87	147	74	2.57017e-13	7.31342e-12	0.017	0.241	-0.224	4	115	41	94	147	74	2.15191e-09
ENSG00000149532	CPSF7	chr11	-	61183137	61183991	61183137	61183256	61183576	61183991	6	126	73	380	147	74	0.000180047	0.00217367	0.023	0.088	-0.065	6	126	51	190	147	74	4.49564e-06	4.46015e-05	0.023	0.119	-0.096	6	126	24	86	147	74	4.08806e-05	0.000379717	0.023	0.123	-0.1	6	126	42	180	147	74	4.80458e-05
ENSG00000162191	UBXN1	chr11	-	62443969	62444477	62443969	62444111	62444284	62444477	7	213	38	221	147	74	7.17906e-06	0.000130989	0.016	0.08	-0.064	7	213	54	146	147	74	5.28577e-13	1.32849e-11	0.016	0.157	-0.141	7	213	60	144	147	74	8.77076e-15	2.75843e-13	0.016	0.173	-0.157	7	213	25	148	147	74	4.62341e-05
ENSG00000255717	SNHG1	chr11	-	62621272	62621536	62621272	62621305	62621489	62621536	55	314	188	207	147	74	0	0	0.081	0.314	-0.233	55	314	213	368	147	74	8.07132e-14	2.18389e-12	0.081	0.226	-0.145	55	314	173	397	147	74	3.65466e-08	5.6642e-07	0.081	0.18	-0.099	55	314	113	303	147	74	2.57506e-05
ENSG00000255717	SNHG1	chr11	-	62622359	62622688	62622359	62622410	62622604	62622688	36	235	161	150	147	74	0	0	0.072	0.351	-0.279	36	235	155	308	147	74	4.98013e-10	9.05551e-09	0.072	0.202	-0.13	36	235	118	272	147	74	2.05323e-07	2.87674e-06	0.072	0.179	-0.107	36	235	80	242	147	74	0.00036165
ENSG00000149823	VPS51	chr11	+	64877176	64878075	64877176	64877260	64877953	64878075	110	27	175	0	147	74	2.61433e-11	9.44846e-10	0.672	1	-0.328	110	27	174	0	147	74	2.85356e-11	6.15912e-10	0.672	1	-0.328	110	27	202	0	147	74	2.75324e-12	7.05092e-11	0.672	1	-0.328	110	27	118	0	147	74	6.91466e-09
ENSG00000162298	SYVN1	chr11	-	64897473	64897851	64897473	64897647	64897722	64897851	2	41	38	102	147	74	0.000577622	0.00584674	0.024	0.158	-0.134	2	41	76	92	147	74	5.43821e-08	7.57466e-07	0.024	0.294	-0.27	2	41	27	29	147	74	5.55752e-07	7.28984e-06	0.024	0.319	-0.295	2	41	37	46	147	74	6.38015e-07
ENSG00000173020	ADRBK1	chr11	+	67049741	67050013	67049741	67049802	67049905	67050013	90	8	163	0	147	74	0.000211514	0.0024948	0.85	1	-0.15	90	8	183	0	147	74	0.000124072	0.000894864	0.85	1	-0.15	90	8	125	0	147	74	0.000683031	0.00463806	0.85	1	-0.15	90	8	120	0	147	74	0.000811973
ENSG00000175634	RPS6KB2	chr11	+	67196997	67200128	67196997	67197066	67200070	67200128	5	12	16	0	147	74	1.17431e-05	0.000200024	0.173	1	-0.827	5	12	33	17	147	74	0.0100803	0.0387519	0.173	0.494	-0.321	5	12	16	6	147	74	0.00828542	0.0375076	0.173	0.573	-0.4	5	12	32	3	147	74	7.8259e-06
ENSG00000175634	RPS6KB2	chr11	+	67202052	67202872	67202052	67202165	67202459	67202872	1	55	16	106	147	74	0.00846093	0.0493306	0.009	0.071	-0.062	1	55	12	48	147	74	0.00105289	0.0058202	0.009	0.112	-0.103	1	55	14	43	147	74	0.000164297	0.00133271	0.009	0.141	-0.132	1	55	15	30	147	74	7.71732e-06
ENSG00000167792	NDUFV1	chr11	+	67375870	67376193	67375870	67375949	67376022	67376193	13	168	57	248	146	74	0.000284739	0.00318524	0.038	0.104	-0.066	13	168	56	193	146	74	9.65104e-06	8.84549e-05	0.038	0.128	-0.09	13	168	41	196	146	74	0.00179869	0.0104015	0.038	0.096	-0.058	13	168	27	134	146	74	0.00598127
ENSG00000167792	NDUFV1	chr11	+	67377851	67378678	67377851	67378041	67378465	67378678	15	138	64	220	147	74	0.000643538	0.00639906	0.052	0.128	-0.076	15	138	74	135	147	74	6.65071e-09	1.03323e-07	0.052	0.216	-0.164	15	138	33	133	147	74	0.011506	0.0485774	0.052	0.111	-0.059	15	138	36	106	147	74	0.000397648
ENSG00000110330	BIRC2	chr11	+	102219328	102221480	102219328	102219495	102220608	102221480	411	23	1645	4	147	74	2.66775e-12	1.08991e-10	0.9	0.995	-0.095	411	23	1026	0	147	74	1.34683e-11	2.96356e-10	0.9	1	-0.1	411	23	502	2	147	74	1.01054e-06	1.2909e-05	0.9	0.992	-0.092	411	23	847	0	147	74	1.18275e-10
ENSG00000215021	PHB2	chr12	-	7076838	7077184	7076838	7076942	7077054	7077184	33	633	166	808	147	74	1.02141e-14	4.88024e-13	0.026	0.094	-0.068	33	633	143	548	147	74	0	0	0.026	0.116	-0.09	33	633	107	592	147	74	1.19926e-10	2.57843e-09	0.026	0.083	-0.057	33	633	94	422	147	74	2.44693e-13
ENSG00000060138	YBX3	chr12	-	10854558	10856747	10854558	10854730	10856653	10856747	1063	30	840	0	147	74	3.93316e-07	8.69614e-06	0.947	1	-0.053	1063	30	1490	0	147	74	1.43673e-09	2.41807e-08	0.947	1	-0.053	1063	30	980	0	147	74	9.22954e-08	1.33791e-06	0.947	1	-0.053	1063	30	775	0	147	74	8.16085e-07
ENSG00000092841	MYL6	chr12	+	56552156	56552495	56552156	56552199	56552467	56552495	32	13	35	0	147	74	0.000130038	0.00161844	0.553	1	-0.447	32	13	88	7	147	74	0.00127115	0.00685914	0.553	0.864	-0.311	32	13	90	0	147	74	9.11197e-08	1.32444e-06	0.553	1	-0.447	32	13	42	0	147	74	3.94929e-05
ENSG00000257309	RP11-603J24.18	chr12	+	56552467	56552704	56552467	56552495	56552591	56552704	25	5	67	0	147	74	0.00124699	0.0110543	0.716	1	-0.284	25	5	200	0	147	74	2.26384e-05	0.000191075	0.716	1	-0.284	25	5	111	0	147	74	0.000199279	0.00158773	0.716	1	-0.284	25	5	98	0	147	74	0.000315995
ENSG00000257309	RP11-603J24.18	chr12	+	56552467	56552704	56552467	56552495	56552685	56552704	12	225	29	1	147	74	0	0	0.026	0.936	-0.91	12	225	90	0	147	74	0	0	0.026	1	-0.974	12	225	49	2	147	74	0	0	0.026	0.925	-0.899	12	225	54	13	147	74	0
ENSG00000092841	MYL6	chr12	+	56552467	56553514	56552467	56552704	56553370	56553514	634	214	840	0	147	74	0	0	0.599	1	-0.401	634	214	834	0	147	74	0	0	0.599	1	-0.401	634	214	806	0	147	74	0	0	0.599	1	-0.401	634	214	632	11	147	74	0
ENSG00000092841	MYL6	chr12	+	56553370	56553932	56553370	56553514	56553758	56553932	98	349	396	65	147	74	0	0	0.124	0.754	-0.63	98	349	392	67	147	74	0	0	0.124	0.747	-0.623	98	349	195	321	147	74	7.94961e-08	1.17132e-06	0.124	0.234	-0.11	98	349	151	235	147	74	6.6686e-08
ENSG00000135473	PAN2	chr12	-	56716398	56716993	56716398	56716542	56716845	56716993	8	17	55	31	147	74	0.00523012	0.0339113	0.192	0.472	-0.28	8	17	56	10	147	74	2.35354e-06	2.51118e-05	0.192	0.738	-0.546	8	17	59	15	147	74	2.23768e-05	0.000223685	0.192	0.664	-0.472	8	17	63	14	147	74	7.0717e-06
ENSG00000076108	BAZ2A	chr12	-	57008797	57009391	57008797	57008912	57009002	57009391	67	16	274	17	147	74	0.000509655	0.0052435	0.678	0.89	-0.212	67	16	379	34	147	74	0.00516381	0.0224972	0.678	0.849	-0.171	67	16	243	17	147	74	0.00150176	0.00892454	0.678	0.878	-0.2	67	16	232	10	147	74	5.8141e-05
ENSG00000182199	SHMT2	chr12	+	57623355	57623594	57623355	57623370	57623506	57623594	42	43	88	0	147	74	0	0	0.33	1	-0.67	42	43	98	35	147	74	0.000307752	0.0020223	0.33	0.585	-0.255	42	43	120	0	147	74	0	0	0.33	1	-0.67	42	43	72	29	147	74	0.00241072
ENSG00000166986	MARS	chr12	+	57905790	57906136	57905790	57905886	57906018	57906136	30	123	156	348	147	74	0.00531303	0.0343519	0.109	0.184	-0.075	30	123	201	81	147	74	0	0	0.109	0.555	-0.446	30	123	81	33	147	74	0	0	0.109	0.553	-0.444	30	123	104	118	147	74	3.64628e-08
ENSG00000175197	DDIT3	chr12	-	57911051	57911536	57911051	57911221	57911488	57911536	107	297	82	70	147	74	2.28111e-09	6.84089e-08	0.154	0.371	-0.217	107	297	405	395	147	74	4.44089e-16	1.45163e-14	0.154	0.34	-0.186	107	297	292	293	147	74	8.63754e-14	2.55234e-12	0.154	0.334	-0.18	107	297	307	424	147	74	1.5015e-07
ENSG00000089053	ANAPC5	chr12	-	121783641	121784808	121783641	121783834	121784698	121784808	10	68	224	362	147	74	2.50651e-06	5.01124e-05	0.069	0.238	-0.169	10	68	78	77	147	74	6.09933e-09	9.5545e-08	0.069	0.338	-0.269	10	68	67	126	147	74	0.000158279	0.00128779	0.069	0.211	-0.142	10	68	77	68	147	74	9.01022e-10
ENSG00000111011	RSRC2	chr12	-	123003385	123005975	123003385	123003576	123005931	123005975	28	304	199	448	147	74	1.11022e-16	5.7426e-15	0.044	0.183	-0.139	28	304	262	1018	147	74	5.4999e-08	7.64175e-07	0.044	0.115	-0.071	28	304	158	632	147	74	5.86889e-07	7.67953e-06	0.044	0.112	-0.068	28	304	191	582	147	74	4.02146e-11
ENSG00000182196	ARL6IP4	chr12	+	123465675	123466426	123465675	123465813	123466141	123466426	225	128	465	180	147	74	0.006766	0.0415289	0.469	0.565	-0.096	225	128	335	76	147	74	3.19719e-08	4.63593e-07	0.469	0.689	-0.22	225	128	302	108	147	74	0.00322328	0.0170116	0.469	0.585	-0.116	225	128	262	87	147	74	0.00113338
ENSG00000182196	ARL6IP4	chr12	+	123465675	123466426	123465675	123465846	123466141	123466426	71	120	220	177	147	74	3.34794e-05	0.000504697	0.229	0.385	-0.156	71	120	198	79	147	74	1.42109e-13	3.79068e-12	0.229	0.558	-0.329	71	120	142	138	147	74	0.0037492	0.0191665	0.229	0.341	-0.112	71	120	117	99	147	74	0.000604122
ENSG00000150991	UBC	chr12	-	125397895	125398311	125397895	125398041	125398269	125398311	5349	292	4194	7	147	74	0	0	0.902	0.997	-0.095	5349	292	24986	0	147	74	0	0	0.902	1	-0.098	5349	292	28050	0	147	74	0	0	0.902	1	-0.098	5349	292	15456	34	147	74	0
ENSG00000133112	TPT1	chr13	-	45914160	45914920	45914160	45914208	45914846	45914920	21563	2395	16282	0	147	74	0	0	0.819	1	-0.181	21563	2395	28197	0	147	74	0	0	0.819	1	-0.181	21563	2395	33215	0	147	74	0	0	0.819	1	-0.181	21563	2395	26874	0	147	74	0
ENSG00000165782	TMEM55B	chr14	-	20926016	20927455	20926016	20926861	20927364	20927455	4	67	33	100	147	74	0.000306438	0.00338764	0.029	0.142	-0.113	4	67	18	78	147	74	0.0107066	0.0406076	0.029	0.104	-0.075	4	67	28	48	147	74	1.93176e-06	2.33461e-05	0.029	0.227	-0.198	4	67	12	43	147	74	0.00732483
ENSG00000100968	NFATC4	chr14	+	24842900	24843672	24842900	24843073	24843531	24843672	55	99	53	40	147	74	0.00115926	0.0103909	0.219	0.4	-0.181	55	99	235	118	147	74	1.21305e-10	2.39017e-09	0.219	0.501	-0.282	55	99	129	94	147	74	2.31934e-05	0.000230562	0.219	0.409	-0.19	55	99	101	75	147	74	8.30194e-05
ENSG00000126777	KTN1	chr14	+	56138283	56138595	56138283	56138339	56138502	56138595	308	15	648	0	147	74	2.65926e-07	6.05653e-06	0.912	1	-0.088	308	15	418	0	147	74	5.60232e-06	5.43416e-05	0.912	1	-0.088	308	15	360	0	147	74	1.5048e-05	0.000156837	0.912	1	-0.088	308	15	401	0	147	74	7.39972e-06
ENSG00000100650	SRSF5	chr14	+	70235898	70237257	70235898	70235968	70237183	70237257	370	275	678	364	147	74	0.00160313	0.0135306	0.404	0.484	-0.08	370	275	1880	377	147	74	0	0	0.404	0.715	-0.311	370	275	1349	201	147	74	0	0	0.404	0.772	-0.368	370	275	1294	534	147	74	7.38643e-10
ENSG00000119688	ABCD4	chr14	-	74763035	74764772	74763035	74763152	74764632	74764772	0	27	31	75	147	74	0.000152804	0.00188102	0	0.172	-0.172	0	27	22	36	147	74	2.21684e-05	0.000187561	0	0.235	-0.235	0	27	7	25	147	74	0.00562314	0.0271709	0	0.124	-0.124	0	27	13	16	147	74	1.80139e-05
ENSG00000214548	MEG3	chr14	+	101295370	101297871	101295370	101296086	101297757	101297871	1778	414	2939	249	147	74	0	0	0.684	0.856	-0.172	1778	414	10827	981	147	74	0	0	0.684	0.847	-0.163	1778	414	6998	513	147	74	0	0	0.684	0.873	-0.189	1778	414	7183	617	147	74	0
ENSG00000168970	JMJD7-PLA2G4B	chr15	+	42128672	42129138	42128672	42128749	42128978	42129138	0	10	18	20	147	74	0.00255105	0.0193762	0	0.312	-0.312	0	10	15	20	147	74	0.00523434	0.0227169	0	0.274	-0.274	0	10	9	14	147	74	0.0118558	0.049696	0	0.244	-0.244	0	10	11	17	147	74	0.00996826
ENSG00000174444	RPL4	chr15	-	66794949	66795502	66794949	66795088	66795395	66795502	23	156	109	136	147	74	7.05991e-13	2.99276e-11	0.069	0.287	-0.218	23	156	130	194	147	74	3.31857e-11	7.0817e-10	0.069	0.252	-0.183	23	156	140	260	147	74	1.03059e-08	1.73746e-07	0.069	0.213	-0.144	23	156	75	147	147	74	7.48886e-07
ENSG00000140983	RHOT2	chr16	+	722253	722566	722253	722384	722488	722566	14	123	49	116	147	74	2.24052e-05	0.000355832	0.054	0.175	-0.121	14	123	52	129	147	74	3.53656e-05	0.00028489	0.054	0.169	-0.115	14	123	31	110	147	74	0.0075222	0.0346653	0.054	0.124	-0.07	14	123	25	68	147	74	0.00114354
ENSG00000140983	RHOT2	chr16	+	722253	722825	722253	722566	722702	722825	8	118	39	138	147	74	0.000109629	0.00139524	0.033	0.125	-0.092	8	118	62	117	147	74	9.00105e-10	1.56138e-08	0.033	0.211	-0.178	8	118	35	105	147	74	2.18552e-05	0.000218878	0.033	0.144	-0.111	8	118	42	92	147	74	1.27144e-07
ENSG00000103266	STUB1	chr16	+	731792	732076	731792	731880	732019	732076	171	172	660	307	147	74	1.97079e-09	5.97382e-08	0.334	0.52	-0.186	171	172	202	96	147	74	4.22905e-06	4.24783e-05	0.334	0.514	-0.18	171	172	238	83	147	74	1.00329e-10	2.18448e-09	0.334	0.591	-0.257	171	172	221	74	147	74	6.36508e-11
ENSG00000140990	NDUFB10	chr16	+	2011497	2011976	2011497	2011637	2011797	2011976	10	121	51	251	147	74	0.00811279	0.047448	0.04	0.093	-0.053	10	121	36	100	147	74	3.28455e-05	0.000266487	0.04	0.153	-0.113	10	121	35	107	147	74	0.000113484	0.000959622	0.04	0.141	-0.101	10	121	28	101	147	74	0.00119897
ENSG00000103145	HCFC1R1	chr16	-	3073233	3073531	3073233	3073362	3073474	3073531	40	115	84	104	147	74	0.000277882	0.00313968	0.149	0.289	-0.14	40	115	209	114	147	74	7.77156e-16	2.51132e-14	0.149	0.48	-0.331	40	115	288	145	147	74	0	0	0.149	0.5	-0.351	40	115	146	87	147	74	5.80869e-13
ENSG00000168488	ATXN2L	chr16	+	28846598	28847079	28846598	28846720	28846869	28847079	47	269	150	291	147	74	1.49025e-09	4.64202e-08	0.081	0.206	-0.125	47	269	170	330	147	74	6.3821e-10	1.13851e-08	0.081	0.206	-0.125	47	269	93	282	147	74	0.00114401	0.00709733	0.081	0.142	-0.061	47	269	142	242	147	74	2.45777e-11
ENSG00000149925	ALDOA	chr16	+	30078770	30080299	30078770	30078982	30080138	30080299	32	113	87	0	147	74	0	0	0.125	1	-0.875	32	113	378	222	147	74	0	0	0.125	0.462	-0.337	32	113	332	158	147	74	0	0	0.125	0.514	-0.389	32	113	138	115	147	74	1.34535e-10
[truncated: 172 more rows]
[truncated: 4 more columns]
